# Supplementary material
Source: publisher figshare collection journal article supplement (https://acs.figshare.com/ndownloader/files/5370479)
Supplement: Supplementary file 1 [file 5370479]

 
data_shelxl
 
_audit_creation_method            'SHELXL-2014/7'
_shelx_SHELXL_version_number      '2014/7'
_chemical_name_systematic         ?
_chemical_name_common             ?
_chemical_melting_point           ?
_chemical_formula_moiety          'C72 H111 Cl O3 Ti' 
_chemical_formula_sum             'C72 H111 Cl O3 Ti' 
_chemical_formula_weight          1107.95

loop_
 _atom_type_symbol
 _atom_type_description
 _atom_type_scat_dispersion_real
 _atom_type_scat_dispersion_imag
 _atom_type_scat_source
 'C'  'C'   0.0033   0.0016
 'International Tables Vol C Tables 4.2.6.8 and 6.1.1.4'
 'H'  'H'   0.0000   0.0000
 'International Tables Vol C Tables 4.2.6.8 and 6.1.1.4'
 'Cl'  'Cl'   0.1484   0.1585
 'International Tables Vol C Tables 4.2.6.8 and 6.1.1.4'
 'O'  'O'   0.0106   0.0060
 'International Tables Vol C Tables 4.2.6.8 and 6.1.1.4'
 'Ti'  'Ti'   0.2776   0.4457
 'International Tables Vol C Tables 4.2.6.8 and 6.1.1.4'
 
_space_group_crystal_system       monoclinic
_space_group_IT_number            14
_space_group_name_H-M_alt         'P 21/n'
_space_group_name_Hall            '-P 2yn'
 
_shelx_space_group_comment
;
The symmetry employed for this shelxl refinement is uniquely defined
by the following loop, which should always be used as a source of
symmetry information in preference to the above space-group names.
They are only intended as comments.
;
 
loop_
 _space_group_symop_operation_xyz
 'x, y, z'
 '-x+1/2, y+1/2, -z+1/2'
 '-x, -y, -z'
 'x-1/2, -y-1/2, z-1/2'
 
_cell_length_a                    10.802(2)
_cell_length_b                    24.288(5)
_cell_length_c                    25.511(5)
_cell_angle_alpha                 90
_cell_angle_beta                  98.010(3)
_cell_angle_gamma                 90
_cell_volume                      6628(2)
_cell_formula_units_Z             4
_cell_measurement_temperature     100(2)
_cell_measurement_reflns_used     12619
_cell_measurement_theta_min       3.1461
_cell_measurement_theta_max       27.4848
 
_exptl_crystal_description              'Block'
_exptl_crystal_colour                   'Green'
_exptl_crystal_density_meas       ?
_exptl_crystal_density_method     ?
_exptl_crystal_density_diffrn     1.110          
_exptl_crystal_F_000              2424
_exptl_transmission_factor_min    ?
_exptl_transmission_factor_max    ?
_exptl_crystal_size_max           0.247
_exptl_crystal_size_mid           0.194
_exptl_crystal_size_min           0.134
_exptl_absorpt_coefficient_mu     0.213
_shelx_estimated_absorpt_T_min    0.949
_shelx_estimated_absorpt_T_max    0.972
_exptl_absorpt_correction_type          'Numerical'
_exptl_absorpt_correction_T_min   0.9644
_exptl_absorpt_correction_T_max   0.9859
_exptl_absorpt_process_details    'Numabs'
_exptl_absorpt_special_details    ?
_diffrn_ambient_temperature       100(2)
_diffrn_radiation_wavelength      0.71075
_diffrn_radiation_type            MoK\a
_diffrn_source                    'Fine-focus rotating anode'
_diffrn_measurement_device_type   'Rigaku AFC-10 with Saturn724+'
_diffrn_measurement_method        '\w-scan'
_diffrn_detector_area_resol_mean  7.31
_diffrn_reflns_number             29973
_diffrn_reflns_av_unetI/netI      0.0707
_diffrn_reflns_av_R_equivalents   0.0492
_diffrn_reflns_limit_h_min        0
_diffrn_reflns_limit_h_max        14
_diffrn_reflns_limit_k_min        -31
_diffrn_reflns_limit_k_max        31
_diffrn_reflns_limit_l_min        -33
_diffrn_reflns_limit_l_max        32
_diffrn_reflns_theta_min          3.146
_diffrn_reflns_theta_max          27.499
_diffrn_reflns_theta_full         25.242
_diffrn_measured_fraction_theta_max   0.998
_diffrn_measured_fraction_theta_full  0.998
_diffrn_reflns_Laue_measured_fraction_max    0.998
_diffrn_reflns_Laue_measured_fraction_full   0.998
_diffrn_reflns_point_group_measured_fraction_max   0.998
_diffrn_reflns_point_group_measured_fraction_full  0.998
_reflns_number_total              15177
_reflns_number_gt                 11966
_reflns_threshold_expression      'I > 2\s(I)'
_reflns_Friedel_coverage          0.000
_reflns_Friedel_fraction_max      .
_reflns_Friedel_fraction_full     .
 
_reflns_special_details
;
 Reflections were merged by SHELXL according to the crystal
 class for the calculation of statistics and refinement.
 
 _reflns_Friedel_fraction is defined as the number of unique
 Friedel pairs measured divided by the number that would be
 possible theoretically, ignoring centric projections and
 systematic absences.
;
 
_computing_data_collection        'CrystalClear'
_computing_cell_refinement        'CrystalClear'
_computing_data_reduction         'CrystalClear'
_computing_structure_solution     'SIR2011'
_computing_structure_refinement 'SHELXL-2014/7 (Sheldrick, 2014)'
_computing_molecular_graphics     'SHELXLE'
_computing_publication_material   'SHELXL-2014/7 (Sheldrick, 2014)'
_refine_special_details           ?
_refine_ls_structure_factor_coef  Fsqd
_refine_ls_matrix_type            full
_refine_ls_weighting_scheme       calc
_refine_ls_weighting_details
'w=1/[\s^2^(Fo^2^)+(0.0580P)^2^+8.6013P] where P=(Fo^2^+2Fc^2^)/3'
_atom_sites_solution_primary      direct
_atom_sites_solution_secondary    difmap
_atom_sites_solution_hydrogens    geom
_refine_ls_hydrogen_treatment     constr
_refine_ls_extinction_method      none
_refine_ls_extinction_coef        .
_refine_ls_number_reflns          15177
_refine_ls_number_parameters      752
_refine_ls_number_restraints      56
_refine_ls_R_factor_all           0.1472
_refine_ls_R_factor_gt            0.1190
_refine_ls_wR_factor_ref          0.2377
_refine_ls_wR_factor_gt           0.2233
_refine_ls_goodness_of_fit_ref    1.249
_refine_ls_restrained_S_all       1.255
_refine_ls_shift/su_max           0.001
_refine_ls_shift/su_mean          0.000
 
loop_
 _atom_site_label
 _atom_site_type_symbol
 _atom_site_fract_x
 _atom_site_fract_y
 _atom_site_fract_z
 _atom_site_U_iso_or_equiv
 _atom_site_adp_type
 _atom_site_occupancy
 _atom_site_site_symmetry_order  
 _atom_site_calc_flag
 _atom_site_refinement_flags_posn
 _atom_site_refinement_flags_adp
 _atom_site_refinement_flags_occupancy
 _atom_site_disorder_assembly
 _atom_site_disorder_group
Ti1 Ti 0.29720(6) 0.25178(3) 0.73284(3) 0.0387(2) Uani 1 1 d . . . . .
Cl1 Cl 0.09935(9) 0.22364(5) 0.73346(5) 0.0572(3) Uani 1 1 d . . . . .
O1 O 0.3432(2) 0.28984(10) 0.79255(9) 0.0337(6) Uani 1 1 d . . . . .
O2 O 0.2962(3) 0.29387(14) 0.67556(10) 0.0508(8) Uani 1 1 d . . . . .
O3 O 0.3853(2) 0.19061(11) 0.72759(10) 0.0374(6) Uani 1 1 d . . . . .
C1 C 0.3981(3) 0.30290(15) 0.84322(13) 0.0286(7) Uani 1 1 d . . . . .
C2 C 0.4887(3) 0.34503(14) 0.85190(14) 0.0296(7) Uani 1 1 d . . . . .
C3 C 0.5254(4) 0.38946(16) 0.81417(16) 0.0373(9) Uani 1 1 d . . . . .
C4 C 0.6395(4) 0.41701(16) 0.84780(16) 0.0430(10) Uani 1 1 d . . . . .
H4A H 0.7180 0.4033 0.8365 0.052 Uiso 1 1 calc R U . . .
H4B H 0.6360 0.4574 0.8426 0.052 Uiso 1 1 calc R U . . .
C5 C 0.6372(4) 0.40314(16) 0.90671(16) 0.0385(9) Uani 1 1 d . . . . .
C6 C 0.5477(3) 0.35457(14) 0.90320(14) 0.0312(8) Uani 1 1 d . . . . .
C7 C 0.5195(3) 0.32357(16) 0.94579(14) 0.0343(8) Uani 1 1 d . . . . .
H7 H 0.5635 0.3294 0.9803 0.041 Uiso 1 1 calc R U . . .
C8 C 0.4263(3) 0.28411(15) 0.93724(14) 0.0317(8) Uani 1 1 d . . . . .
C9 C 0.3803(4) 0.24766(17) 0.97872(15) 0.0377(9) Uani 1 1 d . . . . .
C10 C 0.2532(4) 0.22709(17) 0.94937(15) 0.0398(9) Uani 1 1 d . . . . .
H10A H 0.1839 0.2474 0.9621 0.048 Uiso 1 1 calc R U . . .
H10B H 0.2428 0.1874 0.9566 0.048 Uiso 1 1 calc R U . . .
C11 C 0.2500(3) 0.23647(15) 0.88898(15) 0.0320(8) Uani 1 1 d . . . . .
C12 C 0.3619(3) 0.27487(14) 0.88693(14) 0.0286(7) Uani 1 1 d . . . . .
C13 C 0.5609(4) 0.3697(2) 0.76144(17) 0.0513(11) Uani 1 1 d . . . . .
H13A H 0.6277 0.3422 0.7680 0.077 Uiso 1 1 calc R U . . .
H13B H 0.5901 0.4010 0.7422 0.077 Uiso 1 1 calc R U . . .
H13C H 0.4877 0.3531 0.7402 0.077 Uiso 1 1 calc R U . . .
C14 C 0.4171(4) 0.4305(2) 0.8026(2) 0.0633(14) Uani 1 1 d . . . . .
H14A H 0.3429 0.4113 0.7849 0.095 Uiso 1 1 calc R U . . .
H14B H 0.4407 0.4598 0.7795 0.095 Uiso 1 1 calc R U . . .
H14C H 0.3985 0.4465 0.8359 0.095 Uiso 1 1 calc R U . . .
C15 C 0.7666(4) 0.38746(19) 0.93557(18) 0.0485(11) Uani 1 1 d . . . . .
H15A H 0.8238 0.4188 0.9328 0.058 Uiso 1 1 calc R U . . .
H15B H 0.7595 0.3825 0.9736 0.058 Uiso 1 1 calc R U . . .
C16 C 0.8268(4) 0.3358(2) 0.91626(19) 0.0557(12) Uani 1 1 d . . . . .
H16A H 0.7727 0.3040 0.9196 0.084 Uiso 1 1 calc R U . . .
H16B H 0.9083 0.3298 0.9377 0.084 Uiso 1 1 calc R U . . .
H16C H 0.8381 0.3405 0.8791 0.084 Uiso 1 1 calc R U . . .
C17 C 0.5809(4) 0.45025(17) 0.93706(19) 0.0504(11) Uani 1 1 d . . . . .
H17A H 0.4962 0.4586 0.9185 0.060 Uiso 1 1 calc R U . . .
H17B H 0.5712 0.4367 0.9728 0.060 Uiso 1 1 calc R U . . .
C18 C 0.6561(5) 0.50420(19) 0.9432(2) 0.0655(15) Uani 1 1 d . . . . .
H18A H 0.7361 0.4978 0.9656 0.098 Uiso 1 1 calc R U . . .
H18B H 0.6086 0.5322 0.9596 0.098 Uiso 1 1 calc R U . . .
H18C H 0.6716 0.5170 0.9082 0.098 Uiso 1 1 calc R U . . .
C19 C 0.4684(4) 0.19779(18) 0.99093(17) 0.0471(10) Uani 1 1 d . . . . .
H19A H 0.4317 0.1733 1.0157 0.057 Uiso 1 1 calc R U . . .
H19B H 0.4699 0.1770 0.9576 0.057 Uiso 1 1 calc R U . . .
C20 C 0.6022(4) 0.2100(2) 1.0145(2) 0.0592(13) Uani 1 1 d . . . . .
H20A H 0.6417 0.2329 0.9898 0.089 Uiso 1 1 calc R U . . .
H20B H 0.6485 0.1753 1.0206 0.089 Uiso 1 1 calc R U . . .
H20C H 0.6031 0.2295 1.0481 0.089 Uiso 1 1 calc R U . . .
C21 C 0.3639(4) 0.27915(19) 1.02972(15) 0.0446(10) Uani 1 1 d . . . . .
H21A H 0.3263 0.2539 1.0535 0.054 Uiso 1 1 calc R U . . .
H21B H 0.4478 0.2895 1.0478 0.054 Uiso 1 1 calc R U . . .
C22 C 0.2836(5) 0.3310(2) 1.02214(17) 0.0547(12) Uani 1 1 d . . . . .
H22A H 0.3187 0.3563 0.9981 0.082 Uiso 1 1 calc R U . . .
H22B H 0.2825 0.3491 1.0564 0.082 Uiso 1 1 calc R U . . .
H22C H 0.1982 0.3211 1.0070 0.082 Uiso 1 1 calc R U . . .
C23 C 0.2605(4) 0.18086(15) 0.86095(16) 0.0391(9) Uani 1 1 d . . . . .
H23A H 0.2719 0.1873 0.8240 0.059 Uiso 1 1 calc R U . . .
H23B H 0.1840 0.1595 0.8621 0.059 Uiso 1 1 calc R U . . .
H23C H 0.3323 0.1604 0.8789 0.059 Uiso 1 1 calc R U . . .
C24 C 0.1277(3) 0.26534(16) 0.86710(16) 0.0377(9) Uani 1 1 d . . . . .
H24A H 0.1199 0.2996 0.8867 0.057 Uiso 1 1 calc R U . . .
H24B H 0.0570 0.2411 0.8710 0.057 Uiso 1 1 calc R U . . .
H24C H 0.1278 0.2738 0.8296 0.057 Uiso 1 1 calc R U . . .
C25 C 0.3005(4) 0.3384(2) 0.64231(15) 0.0477(11) Uani 1 1 d . . . . .
C26 C 0.2124(4) 0.3816(2) 0.64199(16) 0.0567(13) Uani 1 1 d . . . . .
C27 C 0.0919(5) 0.3841(2) 0.66714(17) 0.0702(17) Uani 1 1 d D . . . .
C28 C 0.051(4) 0.4443(9) 0.657(2) 0.099(3) Uani 0.26(10) 1 d D U P A 1
H28A H -0.0375 0.4451 0.6399 0.118 Uiso 0.26(10) 1 calc R U P A 1
H28B H 0.0565 0.4643 0.6908 0.118 Uiso 0.26(10) 1 calc R U P A 1
C28B C 0.0364(13) 0.4396(6) 0.6459(12) 0.099(3) Uani 0.74(10) 1 d D U P A 2
H28C H 0.0089 0.4608 0.6754 0.118 Uiso 0.74(10) 1 calc R U P A 2
H28D H -0.0378 0.4327 0.6193 0.118 Uiso 0.74(10) 1 calc R U P A 2
C29 C 0.1326(5) 0.4737(2) 0.6205(2) 0.0743(17) Uani 1 1 d D . . . .
C30 C 0.2244(5) 0.4278(2) 0.61063(18) 0.0560(12) Uani 1 1 d . . . . .
C31 C 0.3162(4) 0.4317(2) 0.57844(19) 0.0558(12) Uani 1 1 d . . . . .
H31 H 0.3234 0.4638 0.5578 0.067 Uiso 1 1 calc R U . . .
C32 C 0.3987(4) 0.38763(18) 0.57654(17) 0.0458(10) Uani 1 1 d . . . . .
C33 C 0.5038(4) 0.38426(19) 0.54274(17) 0.0485(11) Uani 1 1 d . . . . .
C34 C 0.5569(6) 0.32769(19) 0.5557(3) 0.0764(18) Uani 1 1 d . . . . .
H34A H 0.6480 0.3307 0.5673 0.092 Uiso 1 1 calc R U . . .
H34B H 0.5443 0.3046 0.5235 0.092 Uiso 1 1 calc R U . . .
C35 C 0.4952(4) 0.29965(18) 0.59957(16) 0.0435(10) Uani 1 1 d . . . . .
C36 C 0.3930(4) 0.34149(18) 0.60837(15) 0.0416(10) Uani 1 1 d . . . . .
C37 C 0.0019(5) 0.3376(4) 0.6436(2) 0.111(3) Uani 1 1 d . . . . .
H37A H -0.0141 0.3414 0.6050 0.166 Uiso 1 1 calc R U . . .
H37B H -0.0771 0.3405 0.6582 0.166 Uiso 1 1 calc R U . . .
H37C H 0.0403 0.3017 0.6528 0.166 Uiso 1 1 calc R U . . .
C38 C 0.1061(4) 0.3787(2) 0.72799(16) 0.0565(13) Uani 1 1 d . . . . .
H38A H 0.1471 0.3437 0.7388 0.085 Uiso 1 1 calc R U . . .
H38B H 0.0233 0.3797 0.7396 0.085 Uiso 1 1 calc R U . . .
H38C H 0.1569 0.4093 0.7443 0.085 Uiso 1 1 calc R U . . .
C39 C 0.0645(5) 0.4948(2) 0.5686(2) 0.0766(17) Uani 1 1 d . . . . .
H39A H 0.0187 0.4638 0.5496 0.092 Uiso 1 1 calc R U . . .
H39B H 0.1270 0.5080 0.5466 0.092 Uiso 1 1 calc R U . . .
C40 C -0.0288(6) 0.5417(3) 0.5742(3) 0.095(2) Uani 1 1 d . . . . .
H40A H -0.0923 0.5290 0.5953 0.142 Uiso 1 1 calc R U . . .
H40B H -0.0693 0.5529 0.5390 0.142 Uiso 1 1 calc R U . . .
H40C H 0.0159 0.5733 0.5918 0.142 Uiso 1 1 calc R U . . .
C41 C 0.1853(7) 0.5057(3) 0.6707(2) 0.0577(17) Uani 0.574(7) 1 d D U P A 1
H41A H 0.1219 0.5316 0.6809 0.069 Uiso 0.574(7) 1 calc R U P A 1
H41B H 0.2099 0.4801 0.7005 0.069 Uiso 0.574(7) 1 calc R U P A 1
C42 C 0.3001(10) 0.5374(5) 0.6571(5) 0.074(3) Uani 0.574(7) 1 d D U P A 1
H42A H 0.3678 0.5114 0.6536 0.111 Uiso 0.574(7) 1 calc R U P A 1
H42B H 0.3278 0.5638 0.6854 0.111 Uiso 0.574(7) 1 calc R U P A 1
H42C H 0.2777 0.5573 0.6237 0.111 Uiso 0.574(7) 1 calc R U P A 1
C41B C 0.2043(9) 0.5281(3) 0.6338(5) 0.0577(17) Uani 0.426(7) 1 d D U P A 2
H41C H 0.2329 0.5418 0.6010 0.069 Uiso 0.426(7) 1 calc R U P A 2
H41D H 0.1445 0.5554 0.6443 0.069 Uiso 0.426(7) 1 calc R U P A 2
C42B C 0.3181(13) 0.5263(8) 0.6774(6) 0.074(3) Uani 0.426(7) 1 d D U P A 2
H42D H 0.2949 0.5079 0.7088 0.111 Uiso 0.426(7) 1 calc R U P A 2
H42E H 0.3456 0.5639 0.6867 0.111 Uiso 0.426(7) 1 calc R U P A 2
H42F H 0.3863 0.5060 0.6646 0.111 Uiso 0.426(7) 1 calc R U P A 2
C43 C 0.4643(7) 0.4028(4) 0.4839(3) 0.059(3) Uani 0.663(13) 1 d . U P B 1
H43A H 0.4509 0.4431 0.4833 0.071 Uiso 0.663(13) 1 calc R U P B 1
H43B H 0.5344 0.3951 0.4637 0.071 Uiso 0.663(13) 1 calc R U P B 1
C44 C 0.3479(9) 0.3756(5) 0.4557(3) 0.064(3) Uani 0.663(13) 1 d . U P B 1
H44A H 0.3598 0.3356 0.4558 0.096 Uiso 0.663(13) 1 calc R U P B 1
H44B H 0.3320 0.3888 0.4191 0.096 Uiso 0.663(13) 1 calc R U P B 1
H44C H 0.2766 0.3847 0.4740 0.096 Uiso 0.663(13) 1 calc R U P B 1
C43B C 0.4488(12) 0.3594(5) 0.4871(5) 0.039(4) Uani 0.337(13) 1 d . U P B 2
H43C H 0.5172 0.3473 0.4677 0.047 Uiso 0.337(13) 1 calc R U P B 2
H43D H 0.3947 0.3273 0.4917 0.047 Uiso 0.337(13) 1 calc R U P B 2
C44B C 0.3728(18) 0.4056(8) 0.4571(7) 0.058(5) Uani 0.337(13) 1 d . U P B 2
H44D H 0.3119 0.4199 0.4787 0.088 Uiso 0.337(13) 1 calc R U P B 2
H44E H 0.3288 0.3911 0.4237 0.088 Uiso 0.337(13) 1 calc R U P B 2
H44F H 0.4292 0.4353 0.4495 0.088 Uiso 0.337(13) 1 calc R U P B 2
C45 C 0.5982(6) 0.4295(2) 0.5598(3) 0.091(2) Uani 1 1 d . . . . .
H45A H 0.6277 0.4251 0.5980 0.109 Uiso 1 1 calc R U . . .
H45B H 0.5549 0.4654 0.5549 0.109 Uiso 1 1 calc R U . . .
C46 C 0.7123(6) 0.4310(3) 0.5304(4) 0.124(3) Uani 1 1 d . . . . .
H46A H 0.7590 0.3965 0.5365 0.186 Uiso 1 1 calc R U . . .
H46B H 0.7662 0.4619 0.5434 0.186 Uiso 1 1 calc R U . . .
H46C H 0.6847 0.4355 0.4924 0.186 Uiso 1 1 calc R U . . .
C47 C 0.4421(5) 0.24430(18) 0.5812(2) 0.0576(12) Uani 1 1 d . . . . .
H47A H 0.5085 0.2214 0.5701 0.086 Uiso 1 1 calc R U . . .
H47B H 0.3758 0.2495 0.5512 0.086 Uiso 1 1 calc R U . . .
H47C H 0.4076 0.2261 0.6102 0.086 Uiso 1 1 calc R U . . .
C48 C 0.5892(5) 0.2916(3) 0.6489(2) 0.101(3) Uani 1 1 d . . . . .
H48A H 0.5487 0.2731 0.6762 0.152 Uiso 1 1 calc R U . . .
H48B H 0.6210 0.3275 0.6622 0.152 Uiso 1 1 calc R U . . .
H48C H 0.6588 0.2690 0.6404 0.152 Uiso 1 1 calc R U . . .
C49 C 0.4553(3) 0.14667(16) 0.71308(14) 0.0320(8) Uani 1 1 d . . . . .
C50 C 0.4040(3) 0.10944(15) 0.67418(14) 0.0301(8) Uani 1 1 d . . . . .
C51 C 0.2683(3) 0.10275(15) 0.64737(14) 0.0324(8) Uani 1 1 d . . . . .
C52 C 0.2788(3) 0.05669(16) 0.60570(15) 0.0361(8) Uani 1 1 d . . . . .
H52A H 0.2115 0.0292 0.6068 0.043 Uiso 1 1 calc R U . . .
H52B H 0.2696 0.0728 0.5697 0.043 Uiso 1 1 calc R U . . .
C53 C 0.4083(3) 0.02838(15) 0.61844(15) 0.0345(8) Uani 1 1 d . . . . .
C54 C 0.4770(3) 0.06606(16) 0.66010(15) 0.0337(8) Uani 1 1 d . . . . .
C55 C 0.5994(3) 0.05932(16) 0.68315(16) 0.0371(9) Uani 1 1 d . . . . .
H55 H 0.6489 0.0302 0.6723 0.044 Uiso 1 1 calc R U . . .
C56 C 0.6491(3) 0.09594(17) 0.72255(16) 0.0378(9) Uani 1 1 d . . . . .
C57 C 0.7817(4) 0.09535(19) 0.75074(17) 0.0459(10) Uani 1 1 d . . . . .
C58 C 0.7833(4) 0.1439(2) 0.78996(15) 0.0525(12) Uani 1 1 d . . . . .
H58A H 0.8451 0.1717 0.7821 0.063 Uiso 1 1 calc R U . . .
H58B H 0.8082 0.1305 0.8266 0.063 Uiso 1 1 calc R U . . .
C59 C 0.6506(3) 0.1707(2) 0.78519(15) 0.0429(10) Uani 1 1 d . . . . .
C60 C 0.5787(3) 0.13971(17) 0.73819(14) 0.0340(8) Uani 1 1 d . . . . .
C61 C 0.1901(3) 0.08250(19) 0.68949(16) 0.0435(10) Uani 1 1 d . . . . .
H61A H 0.2286 0.0493 0.7065 0.065 Uiso 1 1 calc R U . . .
H61B H 0.1052 0.0740 0.6727 0.065 Uiso 1 1 calc R U . . .
H61C H 0.1869 0.1113 0.7162 0.065 Uiso 1 1 calc R U . . .
C62 C 0.2056(4) 0.15297(17) 0.61877(16) 0.0424(10) Uani 1 1 d . . . . .
H62A H 0.1986 0.1824 0.6445 0.064 Uiso 1 1 calc R U . . .
H62B H 0.1221 0.1428 0.6014 0.064 Uiso 1 1 calc R U . . .
H62C H 0.2561 0.1658 0.5921 0.064 Uiso 1 1 calc R U . . .
C63 C 0.3962(4) -0.02985(16) 0.64188(18) 0.0447(10) Uani 1 1 d . . . . .
H63A H 0.4809 -0.0434 0.6556 0.054 Uiso 1 1 calc R U . . .
H63B H 0.3489 -0.0268 0.6723 0.054 Uiso 1 1 calc R U . . .
C64 C 0.3319(5) -0.07256(18) 0.6035(2) 0.0562(12) Uani 1 1 d . . . . .
H64A H 0.2523 -0.0577 0.5860 0.084 Uiso 1 1 calc R U . . .
H64B H 0.3162 -0.1060 0.6230 0.084 Uiso 1 1 calc R U . . .
H64C H 0.3858 -0.0814 0.5767 0.084 Uiso 1 1 calc R U . . .
C65 C 0.4763(4) 0.02518(15) 0.56901(16) 0.0382(9) Uani 1 1 d . . . . .
H65A H 0.5505 0.0012 0.5772 0.046 Uiso 1 1 calc R U . . .
H65B H 0.4197 0.0076 0.5399 0.046 Uiso 1 1 calc R U . . .
C66 C 0.5183(4) 0.08061(16) 0.54966(16) 0.0418(9) Uani 1 1 d . . . . .
H66A H 0.4461 0.1052 0.5426 0.063 Uiso 1 1 calc R U . . .
H66B H 0.5554 0.0753 0.5171 0.063 Uiso 1 1 calc R U . . .
H66C H 0.5805 0.0969 0.5769 0.063 Uiso 1 1 calc R U . . .
C67 C 0.8175(6) 0.0392(3) 0.7748(3) 0.101(2) Uani 1 1 d . . . . .
H67A H 0.8250 0.0137 0.7452 0.121 Uiso 1 1 calc R U . . .
H67B H 0.9020 0.0428 0.7952 0.121 Uiso 1 1 calc R U . . .
C68 C 0.7421(7) 0.0138(4) 0.8075(3) 0.125(3) Uani 1 1 d . . . . .
H68A H 0.7383 0.0367 0.8388 0.188 Uiso 1 1 calc R U . . .
H68B H 0.7771 -0.0223 0.8184 0.188 Uiso 1 1 calc R U . . .
H68C H 0.6577 0.0091 0.7882 0.188 Uiso 1 1 calc R U . . .
C69 C 0.8736(4) 0.1056(2) 0.7106(2) 0.0614(15) Uani 1 1 d . . . . .
H69A H 0.9582 0.1111 0.7305 0.074 Uiso 1 1 calc R U . . .
H69B H 0.8765 0.0722 0.6887 0.074 Uiso 1 1 calc R U . . .
C70 C 0.8433(4) 0.1544(3) 0.67407(19) 0.080(2) Uani 1 1 d . . . . .
H70A H 0.7634 0.1479 0.6516 0.121 Uiso 1 1 calc R U . . .
H70B H 0.9096 0.1589 0.6518 0.121 Uiso 1 1 calc R U . . .
H70C H 0.8374 0.1877 0.6952 0.121 Uiso 1 1 calc R U . . .
C71 C 0.5889(4) 0.1595(3) 0.83507(16) 0.0633(15) Uani 1 1 d . . . . .
H71A H 0.5040 0.1746 0.8302 0.095 Uiso 1 1 calc R U . . .
H71B H 0.6382 0.1771 0.8657 0.095 Uiso 1 1 calc R U . . .
H71C H 0.5854 0.1197 0.8411 0.095 Uiso 1 1 calc R U . . .
C72 C 0.6590(4) 0.2326(2) 0.77773(18) 0.0537(12) Uani 1 1 d . . . . .
H72A H 0.6953 0.2403 0.7454 0.081 Uiso 1 1 calc R U . . .
H72B H 0.7119 0.2487 0.8082 0.081 Uiso 1 1 calc R U . . .
H72C H 0.5751 0.2487 0.7748 0.081 Uiso 1 1 calc R U . . .
 
loop_
 _atom_site_aniso_label
 _atom_site_aniso_U_11
 _atom_site_aniso_U_22
 _atom_site_aniso_U_33
 _atom_site_aniso_U_23
 _atom_site_aniso_U_13
 _atom_site_aniso_U_12
Ti1 0.0299(4) 0.0570(5) 0.0290(4) -0.0133(3) 0.0040(3) 0.0084(3)
Cl1 0.0292(5) 0.0804(8) 0.0616(7) -0.0380(6) 0.0052(5) 0.0027(5)
O1 0.0324(13) 0.0412(15) 0.0283(13) -0.0075(11) 0.0066(10) 0.0005(11)
O2 0.0482(17) 0.077(2) 0.0273(14) -0.0057(14) 0.0069(12) 0.0249(16)
O3 0.0261(13) 0.0515(17) 0.0350(14) -0.0121(12) 0.0060(10) 0.0069(12)
C1 0.0282(17) 0.0338(19) 0.0242(17) -0.0053(14) 0.0053(13) 0.0036(15)
C2 0.0292(18) 0.0287(18) 0.0326(19) 0.0003(14) 0.0106(14) 0.0021(14)
C3 0.036(2) 0.036(2) 0.042(2) 0.0011(17) 0.0138(17) -0.0015(17)
C4 0.045(2) 0.032(2) 0.057(3) -0.0018(18) 0.024(2) -0.0057(18)
C5 0.037(2) 0.036(2) 0.045(2) -0.0107(17) 0.0168(17) -0.0123(17)
C6 0.0305(18) 0.0281(18) 0.037(2) -0.0053(15) 0.0101(15) -0.0022(15)
C7 0.0340(19) 0.039(2) 0.0293(19) -0.0016(16) 0.0040(15) -0.0021(16)
C8 0.0333(19) 0.0310(19) 0.0322(19) 0.0021(15) 0.0094(15) 0.0008(15)
C9 0.039(2) 0.043(2) 0.032(2) 0.0003(17) 0.0108(16) -0.0042(18)
C10 0.042(2) 0.042(2) 0.037(2) 0.0014(17) 0.0124(17) -0.0097(18)
C11 0.0294(18) 0.0314(19) 0.036(2) -0.0071(15) 0.0084(15) -0.0053(15)
C12 0.0284(17) 0.0257(17) 0.0327(19) -0.0057(14) 0.0076(14) -0.0017(14)
C13 0.052(3) 0.063(3) 0.041(2) 0.003(2) 0.017(2) -0.011(2)
C14 0.053(3) 0.057(3) 0.086(4) 0.035(3) 0.030(3) 0.012(2)
C15 0.040(2) 0.055(3) 0.051(3) -0.016(2) 0.0104(19) -0.018(2)
C16 0.041(2) 0.064(3) 0.063(3) -0.008(2) 0.013(2) -0.003(2)
C17 0.051(3) 0.036(2) 0.070(3) -0.022(2) 0.028(2) -0.0164(19)
C18 0.069(3) 0.044(3) 0.091(4) -0.029(3) 0.037(3) -0.020(2)
C19 0.053(3) 0.044(2) 0.045(2) 0.0079(19) 0.009(2) 0.001(2)
C20 0.053(3) 0.061(3) 0.062(3) 0.022(2) 0.003(2) 0.002(2)
C21 0.049(2) 0.059(3) 0.028(2) 0.0000(18) 0.0104(17) -0.007(2)
C22 0.064(3) 0.062(3) 0.041(2) -0.010(2) 0.017(2) 0.008(2)
C23 0.037(2) 0.030(2) 0.051(2) -0.0064(17) 0.0099(18) -0.0043(16)
C24 0.0328(19) 0.039(2) 0.044(2) -0.0091(17) 0.0130(16) -0.0032(16)
C25 0.052(3) 0.066(3) 0.0238(19) -0.0101(19) 0.0018(17) 0.015(2)
C26 0.047(2) 0.093(4) 0.029(2) -0.018(2) -0.0012(18) 0.028(3)
C27 0.064(3) 0.119(5) 0.027(2) -0.001(3) 0.002(2) 0.046(3)
C28 0.099(5) 0.129(5) 0.071(6) 0.027(4) 0.025(4) 0.075(4)
C28B 0.099(5) 0.129(5) 0.071(6) 0.027(4) 0.025(4) 0.075(4)
C29 0.068(3) 0.074(4) 0.076(4) -0.028(3) -0.006(3) 0.030(3)
C30 0.060(3) 0.066(3) 0.039(2) -0.011(2) -0.004(2) 0.024(2)
C31 0.060(3) 0.054(3) 0.050(3) -0.016(2) -0.003(2) 0.007(2)
C32 0.047(2) 0.044(2) 0.045(2) -0.0145(19) -0.0001(19) 0.0039(19)
C33 0.049(3) 0.051(3) 0.043(2) -0.004(2) 0.0017(19) 0.007(2)
C34 0.097(4) 0.034(2) 0.114(5) 0.004(3) 0.069(4) 0.007(3)
C35 0.049(2) 0.049(2) 0.034(2) -0.0058(18) 0.0113(18) 0.009(2)
C36 0.044(2) 0.053(3) 0.0278(19) -0.0166(18) 0.0027(16) 0.0045(19)
C37 0.039(3) 0.251(10) 0.040(3) -0.040(4) -0.002(2) 0.016(4)
C38 0.057(3) 0.079(3) 0.034(2) -0.011(2) 0.0048(19) 0.030(3)
C39 0.082(4) 0.068(4) 0.085(4) 0.028(3) 0.029(3) 0.039(3)
C40 0.091(4) 0.072(4) 0.125(6) 0.014(4) 0.028(4) 0.042(4)
C41 0.069(4) 0.048(4) 0.057(4) -0.003(3) 0.013(4) 0.020(3)
C42 0.098(5) 0.052(5) 0.075(6) -0.014(5) 0.020(5) 0.001(4)
C41B 0.069(4) 0.048(4) 0.057(4) -0.003(3) 0.013(4) 0.020(3)
C42B 0.098(5) 0.052(5) 0.075(6) -0.014(5) 0.020(5) 0.001(4)
C43 0.054(5) 0.067(6) 0.055(5) 0.011(4) -0.001(4) 0.008(4)
C44 0.062(5) 0.084(6) 0.046(4) 0.000(5) 0.004(4) -0.008(5)
C43B 0.050(7) 0.026(7) 0.041(7) 0.004(5) 0.009(5) 0.010(5)
C44B 0.058(8) 0.056(8) 0.060(8) -0.005(7) 0.005(7) 0.011(7)
C45 0.077(4) 0.035(3) 0.169(7) -0.018(3) 0.044(4) -0.005(3)
C46 0.085(5) 0.061(4) 0.241(10) 0.004(5) 0.077(6) 0.004(4)
C47 0.062(3) 0.036(2) 0.079(3) 0.001(2) 0.026(3) 0.007(2)
C48 0.057(3) 0.196(8) 0.049(3) -0.029(4) 0.001(3) 0.061(4)
C49 0.0256(17) 0.044(2) 0.0278(18) -0.0001(16) 0.0089(14) 0.0039(16)
C50 0.0238(17) 0.039(2) 0.0283(18) 0.0034(15) 0.0062(14) 0.0034(15)
C51 0.0272(18) 0.038(2) 0.0324(19) -0.0058(16) 0.0058(15) 0.0035(15)
C52 0.0314(19) 0.039(2) 0.039(2) -0.0074(17) 0.0089(16) -0.0001(16)
C53 0.0282(18) 0.0316(19) 0.046(2) -0.0026(16) 0.0129(16) 0.0018(15)
C54 0.0261(18) 0.038(2) 0.040(2) 0.0064(16) 0.0126(15) 0.0007(15)
C55 0.0275(18) 0.035(2) 0.051(2) 0.0066(18) 0.0139(17) 0.0086(16)
C56 0.0263(18) 0.046(2) 0.043(2) 0.0114(18) 0.0085(16) 0.0027(16)
C57 0.028(2) 0.059(3) 0.050(2) 0.010(2) 0.0020(17) 0.0088(19)
C58 0.031(2) 0.100(4) 0.025(2) -0.002(2) 0.0009(16) 0.008(2)
C59 0.0269(19) 0.073(3) 0.029(2) -0.0020(19) 0.0042(15) 0.0043(19)
C60 0.0256(17) 0.049(2) 0.0279(18) 0.0049(16) 0.0058(14) 0.0034(16)
C61 0.0258(19) 0.062(3) 0.045(2) -0.008(2) 0.0131(16) -0.0015(18)
C62 0.038(2) 0.049(2) 0.036(2) -0.0110(18) -0.0076(17) 0.0093(18)
C63 0.044(2) 0.036(2) 0.059(3) 0.0052(19) 0.023(2) 0.0022(18)
C64 0.062(3) 0.034(2) 0.080(3) -0.009(2) 0.032(3) -0.008(2)
C65 0.039(2) 0.033(2) 0.047(2) -0.0036(17) 0.0204(17) 0.0031(17)
C66 0.044(2) 0.039(2) 0.045(2) -0.0039(18) 0.0183(18) -0.0054(18)
C67 0.054(3) 0.112(5) 0.126(6) 0.052(5) -0.022(4) 0.006(4)
C68 0.090(5) 0.158(8) 0.119(6) 0.066(6) -0.014(5) 0.012(5)
C69 0.026(2) 0.087(4) 0.074(3) -0.040(3) 0.015(2) -0.004(2)
C70 0.041(3) 0.161(6) 0.040(3) -0.001(3) 0.009(2) -0.034(3)
C71 0.039(2) 0.124(5) 0.028(2) 0.004(3) 0.0104(18) 0.018(3)
C72 0.034(2) 0.077(3) 0.047(3) -0.019(2) -0.0022(19) -0.001(2)
 
_geom_special_details
;
 All esds (except the esd in the dihedral angle between two l.s. planes)
 are estimated using the full covariance matrix.  The cell esds are taken
 into account individually in the estimation of esds in distances, angles
 and torsion angles; correlations between esds in cell parameters are only
 used when they are defined by crystal symmetry.  An approximate (isotropic)
 treatment of cell esds is used for estimating esds involving l.s. planes.
;
 
loop_
 _geom_bond_atom_site_label_1
 _geom_bond_atom_site_label_2
 _geom_bond_distance
 _geom_bond_site_symmetry_2
 _geom_bond_publ_flag
Ti1 O3 1.780(3) . ?
Ti1 O2 1.782(3) . ?
Ti1 O1 1.792(2) . ?
Ti1 Cl1 2.2459(13) . ?
O1 C1 1.382(4) . ?
O2 C25 1.380(5) . ?
O3 C49 1.388(4) . ?
C1 C12 1.408(5) . ?
C1 C2 1.411(5) . ?
C2 C6 1.393(5) . ?
C2 C3 1.535(5) . ?
C3 C13 1.527(5) . ?
C3 C14 1.534(6) . ?
C3 C4 1.552(6) . ?
C4 C5 1.544(6) . ?
C4 H4A 0.9900 . ?
C4 H4B 0.9900 . ?
C5 C6 1.519(5) . ?
C5 C15 1.534(6) . ?
C5 C17 1.552(5) . ?
C6 C7 1.390(5) . ?
C7 C8 1.385(5) . ?
C7 H7 0.9500 . ?
C8 C12 1.390(5) . ?
C8 C9 1.515(5) . ?
C9 C21 1.541(5) . ?
C9 C19 1.545(6) . ?
C9 C10 1.552(5) . ?
C10 C11 1.553(5) . ?
C10 H10A 0.9900 . ?
C10 H10B 0.9900 . ?
C11 C24 1.531(5) . ?
C11 C12 1.534(5) . ?
C11 C23 1.540(5) . ?
C13 H13A 0.9800 . ?
C13 H13B 0.9800 . ?
C13 H13C 0.9800 . ?
C14 H14A 0.9800 . ?
C14 H14B 0.9800 . ?
C14 H14C 0.9800 . ?
C15 C16 1.526(6) . ?
C15 H15A 0.9900 . ?
C15 H15B 0.9900 . ?
C16 H16A 0.9800 . ?
C16 H16B 0.9800 . ?
C16 H16C 0.9800 . ?
C17 C18 1.538(6) . ?
C17 H17A 0.9900 . ?
C17 H17B 0.9900 . ?
C18 H18A 0.9800 . ?
C18 H18B 0.9800 . ?
C18 H18C 0.9800 . ?
C19 C20 1.515(6) . ?
C19 H19A 0.9900 . ?
C19 H19B 0.9900 . ?
C20 H20A 0.9800 . ?
C20 H20B 0.9800 . ?
C20 H20C 0.9800 . ?
C21 C22 1.527(6) . ?
C21 H21A 0.9900 . ?
C21 H21B 0.9900 . ?
C22 H22A 0.9800 . ?
C22 H22B 0.9800 . ?
C22 H22C 0.9800 . ?
C23 H23A 0.9800 . ?
C23 H23B 0.9800 . ?
C23 H23C 0.9800 . ?
C24 H24A 0.9800 . ?
C24 H24B 0.9800 . ?
C24 H24C 0.9800 . ?
C25 C36 1.412(6) . ?
C25 C26 1.415(6) . ?
C26 C30 1.395(7) . ?
C26 C27 1.531(7) . ?
C27 C28 1.541(2) . ?
C27 C28B 1.541(2) . ?
C27 C38 1.544(6) . ?
C27 C37 1.555(9) . ?
C28 C29 1.540(2) . ?
C28 H28A 0.9900 . ?
C28 H28B 0.9900 . ?
C28B C29 1.542(2) . ?
C28B H28C 0.9900 . ?
C28B H28D 0.9900 . ?
C29 C39 1.511(7) . ?
C29 C30 1.535(6) . ?
C29 C41 1.540(2) . ?
C29 C41B 1.545(2) . ?
C30 C31 1.376(7) . ?
C31 C32 1.397(6) . ?
C31 H31 0.9500 . ?
C32 C36 1.390(6) . ?
C32 C33 1.521(6) . ?
C33 C34 1.508(6) . ?
C33 C45 1.519(7) . ?
C33 C43 1.569(8) . ?
C33 C43B 1.580(13) . ?
C34 C35 1.539(6) . ?
C34 H34A 0.9900 . ?
C34 H34B 0.9900 . ?
C35 C47 1.510(6) . ?
C35 C48 1.517(6) . ?
C35 C36 1.540(5) . ?
C37 H37A 0.9800 . ?
C37 H37B 0.9800 . ?
C37 H37C 0.9800 . ?
C38 H38A 0.9800 . ?
C38 H38B 0.9800 . ?
C38 H38C 0.9800 . ?
C39 C40 1.542(7) . ?
C39 H39A 0.9900 . ?
C39 H39B 0.9900 . ?
C40 H40A 0.9800 . ?
C40 H40B 0.9800 . ?
C40 H40C 0.9800 . ?
C41 C42 1.540(2) . ?
C41 H41A 0.9900 . ?
C41 H41B 0.9900 . ?
C42 H42A 0.9800 . ?
C42 H42B 0.9800 . ?
C42 H42C 0.9800 . ?
C41B C42B 1.540(2) . ?
C41B H41C 0.9900 . ?
C41B H41D 0.9900 . ?
C42B H42D 0.9800 . ?
C42B H42E 0.9800 . ?
C42B H42F 0.9800 . ?
C43 C44 1.510(13) . ?
C43 H43A 0.9900 . ?
C43 H43B 0.9900 . ?
C44 H44A 0.9800 . ?
C44 H44B 0.9800 . ?
C44 H44C 0.9800 . ?
C43B C44B 1.53(2) . ?
C43B H43C 0.9900 . ?
C43B H43D 0.9900 . ?
C44B H44D 0.9800 . ?
C44B H44E 0.9800 . ?
C44B H44F 0.9800 . ?
C45 C46 1.530(8) . ?
C45 H45A 0.9900 . ?
C45 H45B 0.9900 . ?
C46 H46A 0.9800 . ?
C46 H46B 0.9800 . ?
C46 H46C 0.9800 . ?
C47 H47A 0.9800 . ?
C47 H47B 0.9800 . ?
C47 H47C 0.9800 . ?
C48 H48A 0.9800 . ?
C48 H48B 0.9800 . ?
C48 H48C 0.9800 . ?
C49 C50 1.399(5) . ?
C49 C60 1.406(5) . ?
C50 C54 1.393(5) . ?
C50 C51 1.537(5) . ?
C51 C62 1.530(5) . ?
C51 C61 1.537(5) . ?
C51 C52 1.558(5) . ?
C52 C53 1.552(5) . ?
C52 H52A 0.9900 . ?
C52 H52B 0.9900 . ?
C53 C54 1.515(5) . ?
C53 C65 1.547(5) . ?
C53 C63 1.548(5) . ?
C54 C55 1.380(5) . ?
C55 C56 1.393(6) . ?
C55 H55 0.9500 . ?
C56 C60 1.397(5) . ?
C56 C57 1.511(5) . ?
C57 C67 1.522(7) . ?
C57 C69 1.543(6) . ?
C57 C58 1.544(6) . ?
C58 C59 1.564(5) . ?
C58 H58A 0.9900 . ?
C58 H58B 0.9900 . ?
C59 C72 1.520(7) . ?
C59 C60 1.532(5) . ?
C59 C71 1.540(5) . ?
C61 H61A 0.9800 . ?
C61 H61B 0.9800 . ?
C61 H61C 0.9800 . ?
C62 H62A 0.9800 . ?
C62 H62B 0.9800 . ?
C62 H62C 0.9800 . ?
C63 C64 1.526(6) . ?
C63 H63A 0.9900 . ?
C63 H63B 0.9900 . ?
C64 H64A 0.9800 . ?
C64 H64B 0.9800 . ?
C64 H64C 0.9800 . ?
C65 C66 1.525(5) . ?
C65 H65A 0.9900 . ?
C65 H65B 0.9900 . ?
C66 H66A 0.9800 . ?
C66 H66B 0.9800 . ?
C66 H66C 0.9800 . ?
C67 C68 1.389(9) . ?
C67 H67A 0.9900 . ?
C67 H67B 0.9900 . ?
C68 H68A 0.9800 . ?
C68 H68B 0.9800 . ?
C68 H68C 0.9800 . ?
C69 C70 1.513(8) . ?
C69 H69A 0.9900 . ?
C69 H69B 0.9900 . ?
C70 H70A 0.9800 . ?
C70 H70B 0.9800 . ?
C70 H70C 0.9800 . ?
C71 H71A 0.9800 . ?
C71 H71B 0.9800 . ?
C71 H71C 0.9800 . ?
C72 H72A 0.9800 . ?
C72 H72B 0.9800 . ?
C72 H72C 0.9800 . ?
 
loop_
 _geom_angle_atom_site_label_1
 _geom_angle_atom_site_label_2
 _geom_angle_atom_site_label_3
 _geom_angle
 _geom_angle_site_symmetry_1
 _geom_angle_site_symmetry_3
 _geom_angle_publ_flag
O3 Ti1 O2 111.07(12) . . ?
O3 Ti1 O1 114.02(12) . . ?
O2 Ti1 O1 111.75(14) . . ?
O3 Ti1 Cl1 105.42(10) . . ?
O2 Ti1 Cl1 106.44(11) . . ?
O1 Ti1 Cl1 107.59(9) . . ?
C1 O1 Ti1 161.0(2) . . ?
C25 O2 Ti1 163.1(3) . . ?
C49 O3 Ti1 168.3(2) . . ?
O1 C1 C12 120.0(3) . . ?
O1 C1 C2 120.7(3) . . ?
C12 C1 C2 119.3(3) . . ?
C6 C2 C1 119.0(3) . . ?
C6 C2 C3 110.3(3) . . ?
C1 C2 C3 130.2(3) . . ?
C13 C3 C14 108.3(4) . . ?
C13 C3 C2 116.7(3) . . ?
C14 C3 C2 108.7(3) . . ?
C13 C3 C4 110.2(3) . . ?
C14 C3 C4 110.6(4) . . ?
C2 C3 C4 102.2(3) . . ?
C5 C4 C3 108.9(3) . . ?
C5 C4 H4A 109.9 . . ?
C3 C4 H4A 109.9 . . ?
C5 C4 H4B 109.9 . . ?
C3 C4 H4B 109.9 . . ?
H4A C4 H4B 108.3 . . ?
C6 C5 C15 111.4(3) . . ?
C6 C5 C4 102.0(3) . . ?
C15 C5 C4 112.6(3) . . ?
C6 C5 C17 108.2(3) . . ?
C15 C5 C17 109.7(3) . . ?
C4 C5 C17 112.7(4) . . ?
C7 C6 C2 121.5(3) . . ?
C7 C6 C5 125.5(3) . . ?
C2 C6 C5 112.9(3) . . ?
C8 C7 C6 119.1(3) . . ?
C8 C7 H7 120.5 . . ?
C6 C7 H7 120.5 . . ?
C7 C8 C12 121.1(3) . . ?
C7 C8 C9 126.6(3) . . ?
C12 C8 C9 112.3(3) . . ?
C8 C9 C21 112.8(3) . . ?
C8 C9 C19 110.3(3) . . ?
C21 C9 C19 111.0(3) . . ?
C8 C9 C10 101.8(3) . . ?
C21 C9 C10 111.7(3) . . ?
C19 C9 C10 108.9(3) . . ?
C9 C10 C11 109.1(3) . . ?
C9 C10 H10A 109.9 . . ?
C11 C10 H10A 109.9 . . ?
C9 C10 H10B 109.9 . . ?
C11 C10 H10B 109.9 . . ?
H10A C10 H10B 108.3 . . ?
C24 C11 C12 110.7(3) . . ?
C24 C11 C23 110.4(3) . . ?
C12 C11 C23 114.1(3) . . ?
C24 C11 C10 109.1(3) . . ?
C12 C11 C10 102.4(3) . . ?
C23 C11 C10 109.8(3) . . ?
C8 C12 C1 119.7(3) . . ?
C8 C12 C11 111.2(3) . . ?
C1 C12 C11 128.9(3) . . ?
C3 C13 H13A 109.5 . . ?
C3 C13 H13B 109.5 . . ?
H13A C13 H13B 109.5 . . ?
C3 C13 H13C 109.5 . . ?
H13A C13 H13C 109.5 . . ?
H13B C13 H13C 109.5 . . ?
C3 C14 H14A 109.5 . . ?
C3 C14 H14B 109.5 . . ?
H14A C14 H14B 109.5 . . ?
C3 C14 H14C 109.5 . . ?
H14A C14 H14C 109.5 . . ?
H14B C14 H14C 109.5 . . ?
C16 C15 C5 116.8(3) . . ?
C16 C15 H15A 108.1 . . ?
C5 C15 H15A 108.1 . . ?
C16 C15 H15B 108.1 . . ?
C5 C15 H15B 108.1 . . ?
H15A C15 H15B 107.3 . . ?
C15 C16 H16A 109.5 . . ?
C15 C16 H16B 109.5 . . ?
H16A C16 H16B 109.5 . . ?
C15 C16 H16C 109.5 . . ?
H16A C16 H16C 109.5 . . ?
H16B C16 H16C 109.5 . . ?
C18 C17 C5 116.1(3) . . ?
C18 C17 H17A 108.3 . . ?
C5 C17 H17A 108.3 . . ?
C18 C17 H17B 108.3 . . ?
C5 C17 H17B 108.3 . . ?
H17A C17 H17B 107.4 . . ?
C17 C18 H18A 109.5 . . ?
C17 C18 H18B 109.5 . . ?
H18A C18 H18B 109.5 . . ?
C17 C18 H18C 109.5 . . ?
H18A C18 H18C 109.5 . . ?
H18B C18 H18C 109.5 . . ?
C20 C19 C9 117.0(4) . . ?
C20 C19 H19A 108.0 . . ?
C9 C19 H19A 108.0 . . ?
C20 C19 H19B 108.0 . . ?
C9 C19 H19B 108.0 . . ?
H19A C19 H19B 107.3 . . ?
C19 C20 H20A 109.5 . . ?
C19 C20 H20B 109.5 . . ?
H20A C20 H20B 109.5 . . ?
C19 C20 H20C 109.5 . . ?
H20A C20 H20C 109.5 . . ?
H20B C20 H20C 109.5 . . ?
C22 C21 C9 115.6(3) . . ?
C22 C21 H21A 108.4 . . ?
C9 C21 H21A 108.4 . . ?
C22 C21 H21B 108.4 . . ?
C9 C21 H21B 108.4 . . ?
H21A C21 H21B 107.4 . . ?
C21 C22 H22A 109.5 . . ?
C21 C22 H22B 109.5 . . ?
H22A C22 H22B 109.5 . . ?
C21 C22 H22C 109.5 . . ?
H22A C22 H22C 109.5 . . ?
H22B C22 H22C 109.5 . . ?
C11 C23 H23A 109.5 . . ?
C11 C23 H23B 109.5 . . ?
H23A C23 H23B 109.5 . . ?
C11 C23 H23C 109.5 . . ?
H23A C23 H23C 109.5 . . ?
H23B C23 H23C 109.5 . . ?
C11 C24 H24A 109.5 . . ?
C11 C24 H24B 109.5 . . ?
H24A C24 H24B 109.5 . . ?
C11 C24 H24C 109.5 . . ?
H24A C24 H24C 109.5 . . ?
H24B C24 H24C 109.5 . . ?
O2 C25 C36 120.4(4) . . ?
O2 C25 C26 120.3(4) . . ?
C36 C25 C26 119.4(4) . . ?
C30 C26 C25 118.9(4) . . ?
C30 C26 C27 111.1(4) . . ?
C25 C26 C27 129.6(5) . . ?
C26 C27 C28 101.9(6) . . ?
C26 C27 C28B 101.5(5) . . ?
C26 C27 C38 116.5(4) . . ?
C28 C27 C38 104(2) . . ?
C28B C27 C38 114.0(12) . . ?
C26 C27 C37 109.4(4) . . ?
C28 C27 C37 118(3) . . ?
C28B C27 C37 107.9(11) . . ?
C38 C27 C37 107.2(5) . . ?
C29 C28 C27 111.6(5) . . ?
C29 C28 H28A 109.3 . . ?
C27 C28 H28A 109.3 . . ?
C29 C28 H28B 109.3 . . ?
C27 C28 H28B 109.3 . . ?
H28A C28 H28B 108.0 . . ?
C27 C28B C29 111.4(5) . . ?
C27 C28B H28C 109.3 . . ?
C29 C28B H28C 109.3 . . ?
C27 C28B H28D 109.3 . . ?
C29 C28B H28D 109.3 . . ?
H28C C28B H28D 108.0 . . ?
C39 C29 C30 110.5(4) . . ?
C39 C29 C28 116(3) . . ?
C30 C29 C28 101.5(5) . . ?
C39 C29 C41 129.5(5) . . ?
C30 C29 C41 109.3(5) . . ?
C28 C29 C41 85(3) . . ?
C39 C29 C28B 106.1(10) . . ?
C30 C29 C28B 99.6(5) . . ?
C39 C29 C41B 94.1(6) . . ?
C30 C29 C41B 110.0(5) . . ?
C28B C29 C41B 135.5(13) . . ?
C31 C30 C26 121.9(4) . . ?
C31 C30 C29 125.7(5) . . ?
C26 C30 C29 112.1(4) . . ?
C30 C31 C32 119.0(5) . . ?
C30 C31 H31 120.5 . . ?
C32 C31 H31 120.5 . . ?
C36 C32 C31 121.1(4) . . ?
C36 C32 C33 112.6(4) . . ?
C31 C32 C33 126.2(4) . . ?
C34 C33 C45 112.1(4) . . ?
C34 C33 C32 102.5(4) . . ?
C45 C33 C32 108.9(4) . . ?
C34 C33 C43 121.1(5) . . ?
C45 C33 C43 98.5(5) . . ?
C32 C33 C43 113.7(4) . . ?
C34 C33 C43B 86.1(6) . . ?
C45 C33 C43B 133.3(7) . . ?
C32 C33 C43B 108.2(6) . . ?
C33 C34 C35 111.9(4) . . ?
C33 C34 H34A 109.2 . . ?
C35 C34 H34A 109.2 . . ?
C33 C34 H34B 109.2 . . ?
C35 C34 H34B 109.2 . . ?
H34A C34 H34B 107.9 . . ?
C47 C35 C48 108.9(5) . . ?
C47 C35 C34 110.6(4) . . ?
C48 C35 C34 110.6(5) . . ?
C47 C35 C36 112.6(4) . . ?
C48 C35 C36 112.0(3) . . ?
C34 C35 C36 101.9(4) . . ?
C32 C36 C25 119.5(4) . . ?
C32 C36 C35 110.8(4) . . ?
C25 C36 C35 129.6(4) . . ?
C27 C37 H37A 109.5 . . ?
C27 C37 H37B 109.5 . . ?
H37A C37 H37B 109.5 . . ?
C27 C37 H37C 109.5 . . ?
H37A C37 H37C 109.5 . . ?
H37B C37 H37C 109.5 . . ?
C27 C38 H38A 109.5 . . ?
C27 C38 H38B 109.5 . . ?
H38A C38 H38B 109.5 . . ?
C27 C38 H38C 109.5 . . ?
H38A C38 H38C 109.5 . . ?
H38B C38 H38C 109.5 . . ?
C29 C39 C40 114.5(5) . . ?
C29 C39 H39A 108.6 . . ?
C40 C39 H39A 108.6 . . ?
C29 C39 H39B 108.6 . . ?
C40 C39 H39B 108.6 . . ?
H39A C39 H39B 107.6 . . ?
C39 C40 H40A 109.5 . . ?
C39 C40 H40B 109.5 . . ?
H40A C40 H40B 109.5 . . ?
C39 C40 H40C 109.5 . . ?
H40A C40 H40C 109.5 . . ?
H40B C40 H40C 109.5 . . ?
C42 C41 C29 106.3(7) . . ?
C42 C41 H41A 110.5 . . ?
C29 C41 H41A 110.5 . . ?
C42 C41 H41B 110.5 . . ?
C29 C41 H41B 110.5 . . ?
H41A C41 H41B 108.7 . . ?
C41 C42 H42A 109.5 . . ?
C41 C42 H42B 109.5 . . ?
H42A C42 H42B 109.5 . . ?
C41 C42 H42C 109.5 . . ?
H42A C42 H42C 109.5 . . ?
H42B C42 H42C 109.5 . . ?
C42B C41B C29 117.4(10) . . ?
C42B C41B H41C 107.9 . . ?
C29 C41B H41C 107.9 . . ?
C42B C41B H41D 107.9 . . ?
C29 C41B H41D 107.9 . . ?
H41C C41B H41D 107.2 . . ?
C41B C42B H42D 109.5 . . ?
C41B C42B H42E 109.5 . . ?
H42D C42B H42E 109.5 . . ?
C41B C42B H42F 109.5 . . ?
H42D C42B H42F 109.5 . . ?
H42E C42B H42F 109.5 . . ?
C44 C43 C33 115.3(7) . . ?
C44 C43 H43A 108.5 . . ?
C33 C43 H43A 108.5 . . ?
C44 C43 H43B 108.5 . . ?
C33 C43 H43B 108.5 . . ?
H43A C43 H43B 107.5 . . ?
C43 C44 H44A 109.5 . . ?
C43 C44 H44B 109.5 . . ?
H44A C44 H44B 109.5 . . ?
C43 C44 H44C 109.5 . . ?
H44A C44 H44C 109.5 . . ?
H44B C44 H44C 109.5 . . ?
C44B C43B C33 106.1(11) . . ?
C44B C43B H43C 110.5 . . ?
C33 C43B H43C 110.5 . . ?
C44B C43B H43D 110.5 . . ?
C33 C43B H43D 110.5 . . ?
H43C C43B H43D 108.7 . . ?
C43B C44B H44D 109.5 . . ?
C43B C44B H44E 109.5 . . ?
H44D C44B H44E 109.5 . . ?
C43B C44B H44F 109.5 . . ?
H44D C44B H44F 109.5 . . ?
H44E C44B H44F 109.5 . . ?
C33 C45 C46 115.6(5) . . ?
C33 C45 H45A 108.4 . . ?
C46 C45 H45A 108.4 . . ?
C33 C45 H45B 108.4 . . ?
C46 C45 H45B 108.4 . . ?
H45A C45 H45B 107.4 . . ?
C45 C46 H46A 109.5 . . ?
C45 C46 H46B 109.5 . . ?
H46A C46 H46B 109.5 . . ?
C45 C46 H46C 109.5 . . ?
H46A C46 H46C 109.5 . . ?
H46B C46 H46C 109.5 . . ?
C35 C47 H47A 109.5 . . ?
C35 C47 H47B 109.5 . . ?
H47A C47 H47B 109.5 . . ?
C35 C47 H47C 109.5 . . ?
H47A C47 H47C 109.5 . . ?
H47B C47 H47C 109.5 . . ?
C35 C48 H48A 109.5 . . ?
C35 C48 H48B 109.5 . . ?
H48A C48 H48B 109.5 . . ?
C35 C48 H48C 109.5 . . ?
H48A C48 H48C 109.5 . . ?
H48B C48 H48C 109.5 . . ?
O3 C49 C50 120.6(3) . . ?
O3 C49 C60 119.2(3) . . ?
C50 C49 C60 120.2(3) . . ?
C54 C50 C49 119.3(3) . . ?
C54 C50 C51 110.1(3) . . ?
C49 C50 C51 130.0(3) . . ?
C62 C51 C61 109.8(3) . . ?
C62 C51 C50 117.3(3) . . ?
C61 C51 C50 107.8(3) . . ?
C62 C51 C52 108.5(3) . . ?
C61 C51 C52 110.3(3) . . ?
C50 C51 C52 102.9(3) . . ?
C53 C52 C51 108.9(3) . . ?
C53 C52 H52A 109.9 . . ?
C51 C52 H52A 109.9 . . ?
C53 C52 H52B 109.9 . . ?
C51 C52 H52B 109.9 . . ?
H52A C52 H52B 108.3 . . ?
C54 C53 C65 111.2(3) . . ?
C54 C53 C63 109.9(3) . . ?
C65 C53 C63 110.2(3) . . ?
C54 C53 C52 102.6(3) . . ?
C65 C53 C52 111.6(3) . . ?
C63 C53 C52 111.3(3) . . ?
C55 C54 C50 121.5(4) . . ?
C55 C54 C53 125.0(3) . . ?
C50 C54 C53 113.5(3) . . ?
C54 C55 C56 118.8(3) . . ?
C54 C55 H55 120.6 . . ?
C56 C55 H55 120.6 . . ?
C55 C56 C60 121.4(3) . . ?
C55 C56 C57 125.6(4) . . ?
C60 C56 C57 112.9(4) . . ?
C56 C57 C67 111.8(4) . . ?
C56 C57 C69 109.7(4) . . ?
C67 C57 C69 105.2(4) . . ?
C56 C57 C58 103.0(3) . . ?
C67 C57 C58 116.3(5) . . ?
C69 C57 C58 110.9(4) . . ?
C57 C58 C59 109.9(3) . . ?
C57 C58 H58A 109.7 . . ?
C59 C58 H58A 109.7 . . ?
C57 C58 H58B 109.7 . . ?
C59 C58 H58B 109.7 . . ?
H58A C58 H58B 108.2 . . ?
C72 C59 C60 114.9(3) . . ?
C72 C59 C71 108.6(4) . . ?
C60 C59 C71 109.3(4) . . ?
C72 C59 C58 110.6(4) . . ?
C60 C59 C58 102.4(3) . . ?
C71 C59 C58 111.1(3) . . ?
C56 C60 C49 118.7(3) . . ?
C56 C60 C59 111.1(3) . . ?
C49 C60 C59 130.0(3) . . ?
C51 C61 H61A 109.5 . . ?
C51 C61 H61B 109.5 . . ?
H61A C61 H61B 109.5 . . ?
C51 C61 H61C 109.5 . . ?
H61A C61 H61C 109.5 . . ?
H61B C61 H61C 109.5 . . ?
C51 C62 H62A 109.5 . . ?
C51 C62 H62B 109.5 . . ?
H62A C62 H62B 109.5 . . ?
C51 C62 H62C 109.5 . . ?
H62A C62 H62C 109.5 . . ?
H62B C62 H62C 109.5 . . ?
C64 C63 C53 115.4(4) . . ?
C64 C63 H63A 108.4 . . ?
C53 C63 H63A 108.4 . . ?
C64 C63 H63B 108.4 . . ?
C53 C63 H63B 108.4 . . ?
H63A C63 H63B 107.5 . . ?
C63 C64 H64A 109.5 . . ?
C63 C64 H64B 109.5 . . ?
H64A C64 H64B 109.5 . . ?
C63 C64 H64C 109.5 . . ?
H64A C64 H64C 109.5 . . ?
H64B C64 H64C 109.5 . . ?
C66 C65 C53 114.6(3) . . ?
C66 C65 H65A 108.6 . . ?
C53 C65 H65A 108.6 . . ?
C66 C65 H65B 108.6 . . ?
C53 C65 H65B 108.6 . . ?
H65A C65 H65B 107.6 . . ?
C65 C66 H66A 109.5 . . ?
C65 C66 H66B 109.5 . . ?
H66A C66 H66B 109.5 . . ?
C65 C66 H66C 109.5 . . ?
H66A C66 H66C 109.5 . . ?
H66B C66 H66C 109.5 . . ?
C68 C67 C57 120.1(6) . . ?
C68 C67 H67A 107.3 . . ?
C57 C67 H67A 107.3 . . ?
C68 C67 H67B 107.3 . . ?
C57 C67 H67B 107.3 . . ?
H67A C67 H67B 106.9 . . ?
C67 C68 H68A 109.5 . . ?
C67 C68 H68B 109.5 . . ?
H68A C68 H68B 109.5 . . ?
C67 C68 H68C 109.5 . . ?
H68A C68 H68C 109.5 . . ?
H68B C68 H68C 109.5 . . ?
C70 C69 C57 115.6(4) . . ?
C70 C69 H69A 108.4 . . ?
C57 C69 H69A 108.4 . . ?
C70 C69 H69B 108.4 . . ?
C57 C69 H69B 108.4 . . ?
H69A C69 H69B 107.4 . . ?
C69 C70 H70A 109.5 . . ?
C69 C70 H70B 109.5 . . ?
H70A C70 H70B 109.5 . . ?
C69 C70 H70C 109.5 . . ?
H70A C70 H70C 109.5 . . ?
H70B C70 H70C 109.5 . . ?
C59 C71 H71A 109.5 . . ?
C59 C71 H71B 109.5 . . ?
H71A C71 H71B 109.5 . . ?
C59 C71 H71C 109.5 . . ?
H71A C71 H71C 109.5 . . ?
H71B C71 H71C 109.5 . . ?
C59 C72 H72A 109.5 . . ?
C59 C72 H72B 109.5 . . ?
H72A C72 H72B 109.5 . . ?
C59 C72 H72C 109.5 . . ?
H72A C72 H72C 109.5 . . ?
H72B C72 H72C 109.5 . . ?
 
loop_
 _geom_torsion_atom_site_label_1
 _geom_torsion_atom_site_label_2
 _geom_torsion_atom_site_label_3
 _geom_torsion_atom_site_label_4
 _geom_torsion
 _geom_torsion_site_symmetry_1
 _geom_torsion_site_symmetry_2
 _geom_torsion_site_symmetry_3
 _geom_torsion_site_symmetry_4
 _geom_torsion_publ_flag
O3 Ti1 O1 C1 -14.9(7) . . . . ?
O2 Ti1 O1 C1 -141.8(7) . . . . ?
Cl1 Ti1 O1 C1 101.7(7) . . . . ?
O3 Ti1 O2 C25 -137.8(9) . . . . ?
O1 Ti1 O2 C25 -9.2(10) . . . . ?
Cl1 Ti1 O2 C25 108.0(9) . . . . ?
O2 Ti1 O3 C49 -6.4(12) . . . . ?
O1 Ti1 O3 C49 -133.7(11) . . . . ?
Cl1 Ti1 O3 C49 108.5(12) . . . . ?
Ti1 O1 C1 C12 -64.2(8) . . . . ?
Ti1 O1 C1 C2 117.2(7) . . . . ?
O1 C1 C2 C6 -175.9(3) . . . . ?
C12 C1 C2 C6 5.5(5) . . . . ?
O1 C1 C2 C3 12.8(5) . . . . ?
C12 C1 C2 C3 -165.8(3) . . . . ?
C6 C2 C3 C13 134.3(4) . . . . ?
C1 C2 C3 C13 -53.8(5) . . . . ?
C6 C2 C3 C14 -102.9(4) . . . . ?
C1 C2 C3 C14 69.0(5) . . . . ?
C6 C2 C3 C4 14.0(4) . . . . ?
C1 C2 C3 C4 -174.0(4) . . . . ?
C13 C3 C4 C5 -143.9(3) . . . . ?
C14 C3 C4 C5 96.4(4) . . . . ?
C2 C3 C4 C5 -19.1(4) . . . . ?
C3 C4 C5 C6 17.0(4) . . . . ?
C3 C4 C5 C15 136.5(3) . . . . ?
C3 C4 C5 C17 -98.7(4) . . . . ?
C1 C2 C6 C7 0.0(5) . . . . ?
C3 C2 C6 C7 173.0(3) . . . . ?
C1 C2 C6 C5 -176.8(3) . . . . ?
C3 C2 C6 C5 -3.8(4) . . . . ?
C15 C5 C6 C7 54.8(5) . . . . ?
C4 C5 C6 C7 175.1(4) . . . . ?
C17 C5 C6 C7 -65.9(5) . . . . ?
C15 C5 C6 C2 -128.6(3) . . . . ?
C4 C5 C6 C2 -8.3(4) . . . . ?
C17 C5 C6 C2 110.7(4) . . . . ?
C2 C6 C7 C8 -3.1(5) . . . . ?
C5 C6 C7 C8 173.3(3) . . . . ?
C6 C7 C8 C12 0.6(5) . . . . ?
C6 C7 C8 C9 -178.2(3) . . . . ?
C7 C8 C9 C21 43.1(5) . . . . ?
C12 C8 C9 C21 -135.8(3) . . . . ?
C7 C8 C9 C19 -81.6(5) . . . . ?
C12 C8 C9 C19 99.5(4) . . . . ?
C7 C8 C9 C10 162.9(4) . . . . ?
C12 C8 C9 C10 -16.0(4) . . . . ?
C8 C9 C10 C11 17.6(4) . . . . ?
C21 C9 C10 C11 138.2(3) . . . . ?
C19 C9 C10 C11 -98.8(4) . . . . ?
C9 C10 C11 C24 -130.7(3) . . . . ?
C9 C10 C11 C12 -13.3(4) . . . . ?
C9 C10 C11 C23 108.2(4) . . . . ?
C7 C8 C12 C1 4.9(5) . . . . ?
C9 C8 C12 C1 -176.1(3) . . . . ?
C7 C8 C12 C11 -170.6(3) . . . . ?
C9 C8 C12 C11 8.3(4) . . . . ?
O1 C1 C12 C8 173.4(3) . . . . ?
C2 C1 C12 C8 -7.9(5) . . . . ?
O1 C1 C12 C11 -11.9(5) . . . . ?
C2 C1 C12 C11 166.8(3) . . . . ?
C24 C11 C12 C8 119.5(3) . . . . ?
C23 C11 C12 C8 -115.3(4) . . . . ?
C10 C11 C12 C8 3.3(4) . . . . ?
C24 C11 C12 C1 -55.5(5) . . . . ?
C23 C11 C12 C1 69.7(5) . . . . ?
C10 C11 C12 C1 -171.8(4) . . . . ?
C6 C5 C15 C16 50.8(5) . . . . ?
C4 C5 C15 C16 -63.1(5) . . . . ?
C17 C5 C15 C16 170.6(4) . . . . ?
C6 C5 C17 C18 -178.0(4) . . . . ?
C15 C5 C17 C18 60.3(5) . . . . ?
C4 C5 C17 C18 -66.0(5) . . . . ?
C8 C9 C19 C20 62.8(5) . . . . ?
C21 C9 C19 C20 -62.9(5) . . . . ?
C10 C9 C19 C20 173.7(4) . . . . ?
C8 C9 C21 C22 52.8(5) . . . . ?
C19 C9 C21 C22 177.1(4) . . . . ?
C10 C9 C21 C22 -61.2(5) . . . . ?
Ti1 O2 C25 C36 120.0(8) . . . . ?
Ti1 O2 C25 C26 -59.9(11) . . . . ?
O2 C25 C26 C30 175.7(4) . . . . ?
C36 C25 C26 C30 -4.2(6) . . . . ?
O2 C25 C26 C27 -11.6(7) . . . . ?
C36 C25 C26 C27 168.5(4) . . . . ?
C30 C26 C27 C28 -13(3) . . . . ?
C25 C26 C27 C28 174(3) . . . . ?
C30 C26 C27 C28B -0.6(14) . . . . ?
C25 C26 C27 C28B -173.8(13) . . . . ?
C30 C26 C27 C38 -125.1(5) . . . . ?
C25 C26 C27 C38 61.7(7) . . . . ?
C30 C26 C27 C37 113.2(5) . . . . ?
C25 C26 C27 C37 -60.0(6) . . . . ?
C26 C27 C28 C29 8(5) . . . . ?
C38 C27 C28 C29 129(4) . . . . ?
C37 C27 C28 C29 -112(4) . . . . ?
C26 C27 C28B C29 -12(2) . . . . ?
C38 C27 C28B C29 113.7(16) . . . . ?
C37 C27 C28B C29 -127.4(17) . . . . ?
C27 C28 C29 C39 119(4) . . . . ?
C27 C28 C29 C30 -1(5) . . . . ?
C27 C28 C29 C41 -109(4) . . . . ?
C27 C28B C29 C39 134.0(17) . . . . ?
C27 C28B C29 C30 19(2) . . . . ?
C27 C28B C29 C41B -112.6(15) . . . . ?
C25 C26 C30 C31 2.7(7) . . . . ?
C27 C26 C30 C31 -171.3(4) . . . . ?
C25 C26 C30 C29 -172.4(4) . . . . ?
C27 C26 C30 C29 13.6(5) . . . . ?
C39 C29 C30 C31 54.0(7) . . . . ?
C28 C29 C30 C31 177(3) . . . . ?
C41 C29 C30 C31 -94.2(6) . . . . ?
C28B C29 C30 C31 165.3(13) . . . . ?
C41B C29 C30 C31 -48.4(7) . . . . ?
C39 C29 C30 C26 -131.1(5) . . . . ?
C28 C29 C30 C26 -8(3) . . . . ?
C41 C29 C30 C26 80.6(6) . . . . ?
C28B C29 C30 C26 -19.8(13) . . . . ?
C41B C29 C30 C26 126.4(6) . . . . ?
C26 C30 C31 C32 0.9(7) . . . . ?
C29 C30 C31 C32 175.3(4) . . . . ?
C30 C31 C32 C36 -3.1(6) . . . . ?
C30 C31 C32 C33 178.9(4) . . . . ?
C36 C32 C33 C34 3.5(5) . . . . ?
C31 C32 C33 C34 -178.3(5) . . . . ?
C36 C32 C33 C45 -115.3(5) . . . . ?
C31 C32 C33 C45 62.8(6) . . . . ?
C36 C32 C33 C43 135.9(5) . . . . ?
C31 C32 C33 C43 -45.9(7) . . . . ?
C36 C32 C33 C43B 93.5(6) . . . . ?
C31 C32 C33 C43B -88.3(7) . . . . ?
C45 C33 C34 C35 111.4(6) . . . . ?
C32 C33 C34 C35 -5.2(6) . . . . ?
C43 C33 C34 C35 -133.0(6) . . . . ?
C43B C33 C34 C35 -113.0(7) . . . . ?
C33 C34 C35 C47 124.8(5) . . . . ?
C33 C34 C35 C48 -114.4(5) . . . . ?
C33 C34 C35 C36 4.8(6) . . . . ?
C31 C32 C36 C25 1.5(6) . . . . ?
C33 C32 C36 C25 179.7(4) . . . . ?
C31 C32 C36 C35 -178.9(4) . . . . ?
C33 C32 C36 C35 -0.6(5) . . . . ?
O2 C25 C36 C32 -177.7(4) . . . . ?
C26 C25 C36 C32 2.2(6) . . . . ?
O2 C25 C36 C35 2.7(6) . . . . ?
C26 C25 C36 C35 -177.4(4) . . . . ?
C47 C35 C36 C32 -121.0(4) . . . . ?
C48 C35 C36 C32 115.7(5) . . . . ?
C34 C35 C36 C32 -2.5(5) . . . . ?
C47 C35 C36 C25 58.6(6) . . . . ?
C48 C35 C36 C25 -64.7(6) . . . . ?
C34 C35 C36 C25 177.1(5) . . . . ?
C30 C29 C39 C40 -179.1(5) . . . . ?
C28 C29 C39 C40 66.3(17) . . . . ?
C41 C29 C39 C40 -39.2(9) . . . . ?
C28B C29 C39 C40 73.8(10) . . . . ?
C41B C29 C39 C40 -66.1(7) . . . . ?
C39 C29 C41 C42 -71.4(9) . . . . ?
C30 C29 C41 C42 68.9(8) . . . . ?
C28 C29 C41 C42 169.4(12) . . . . ?
C39 C29 C41B C42B -164.2(11) . . . . ?
C30 C29 C41B C42B -50.7(13) . . . . ?
C28B C29 C41B C42B 77.9(15) . . . . ?
C34 C33 C43 C44 71.3(9) . . . . ?
C45 C33 C43 C44 -166.4(7) . . . . ?
C32 C33 C43 C44 -51.4(9) . . . . ?
C34 C33 C43B C44B 177.1(11) . . . . ?
C45 C33 C43B C44B -65.9(13) . . . . ?
C32 C33 C43B C44B 75.2(12) . . . . ?
C34 C33 C45 C46 66.0(7) . . . . ?
C32 C33 C45 C46 178.6(6) . . . . ?
C43 C33 C45 C46 -62.6(7) . . . . ?
C43B C33 C45 C46 -40.4(10) . . . . ?
Ti1 O3 C49 C50 -66.8(13) . . . . ?
Ti1 O3 C49 C60 113.6(11) . . . . ?
O3 C49 C50 C54 179.4(3) . . . . ?
C60 C49 C50 C54 -1.0(5) . . . . ?
O3 C49 C50 C51 -10.0(6) . . . . ?
C60 C49 C50 C51 169.6(3) . . . . ?
C54 C50 C51 C62 -131.3(3) . . . . ?
C49 C50 C51 C62 57.4(5) . . . . ?
C54 C50 C51 C61 104.2(3) . . . . ?
C49 C50 C51 C61 -67.1(5) . . . . ?
C54 C50 C51 C52 -12.4(4) . . . . ?
C49 C50 C51 C52 176.3(4) . . . . ?
C62 C51 C52 C53 138.9(3) . . . . ?
C61 C51 C52 C53 -100.8(3) . . . . ?
C50 C51 C52 C53 13.9(4) . . . . ?
C51 C52 C53 C54 -10.5(4) . . . . ?
C51 C52 C53 C65 -129.6(3) . . . . ?
C51 C52 C53 C63 106.9(4) . . . . ?
C49 C50 C54 C55 -0.8(5) . . . . ?
C51 C50 C54 C55 -173.2(3) . . . . ?
C49 C50 C54 C53 178.7(3) . . . . ?
C51 C50 C54 C53 6.3(4) . . . . ?
C65 C53 C54 C55 -58.4(5) . . . . ?
C63 C53 C54 C55 63.8(5) . . . . ?
C52 C53 C54 C55 -177.7(3) . . . . ?
C65 C53 C54 C50 122.1(3) . . . . ?
C63 C53 C54 C50 -115.7(3) . . . . ?
C52 C53 C54 C50 2.7(4) . . . . ?
C50 C54 C55 C56 2.0(5) . . . . ?
C53 C54 C55 C56 -177.5(3) . . . . ?
C54 C55 C56 C60 -1.4(6) . . . . ?
C54 C55 C56 C57 -178.3(4) . . . . ?
C55 C56 C57 C67 -53.8(6) . . . . ?
C60 C56 C57 C67 129.1(5) . . . . ?
C55 C56 C57 C69 62.5(5) . . . . ?
C60 C56 C57 C69 -114.6(4) . . . . ?
C55 C56 C57 C58 -179.3(4) . . . . ?
C60 C56 C57 C58 3.5(5) . . . . ?
C56 C57 C58 C59 1.8(5) . . . . ?
C67 C57 C58 C59 -120.9(4) . . . . ?
C69 C57 C58 C59 119.1(4) . . . . ?
C57 C58 C59 C72 -128.6(4) . . . . ?
C57 C58 C59 C60 -5.7(5) . . . . ?
C57 C58 C59 C71 110.8(4) . . . . ?
C55 C56 C60 C49 -0.4(6) . . . . ?
C57 C56 C60 C49 176.9(3) . . . . ?
C55 C56 C60 C59 175.1(3) . . . . ?
C57 C56 C60 C59 -7.6(5) . . . . ?
O3 C49 C60 C56 -178.8(3) . . . . ?
C50 C49 C60 C56 1.6(5) . . . . ?
O3 C49 C60 C59 6.7(6) . . . . ?
C50 C49 C60 C59 -172.9(4) . . . . ?
C72 C59 C60 C56 128.0(4) . . . . ?
C71 C59 C60 C56 -109.8(4) . . . . ?
C58 C59 C60 C56 8.0(4) . . . . ?
C72 C59 C60 C49 -57.2(5) . . . . ?
C71 C59 C60 C49 65.0(6) . . . . ?
C58 C59 C60 C49 -177.2(4) . . . . ?
C54 C53 C63 C64 -178.3(3) . . . . ?
C65 C53 C63 C64 -55.5(5) . . . . ?
C52 C53 C63 C64 68.7(4) . . . . ?
C54 C53 C65 C66 -45.4(5) . . . . ?
C63 C53 C65 C66 -167.5(3) . . . . ?
C52 C53 C65 C66 68.4(4) . . . . ?
C56 C57 C67 C68 -52.1(9) . . . . ?
C69 C57 C67 C68 -171.2(7) . . . . ?
C58 C57 C67 C68 65.8(8) . . . . ?
C56 C57 C69 C70 49.1(5) . . . . ?
C67 C57 C69 C70 169.5(5) . . . . ?
C58 C57 C69 C70 -64.0(5) . . . . ?
 
_refine_diff_density_max    0.624
_refine_diff_density_min   -0.530
_refine_diff_density_rms    0.058

_shelx_res_file
;

    shelxl.res created by SHELXL-2014/7


TITL (EMindO)3TiCl 031714
CELL  0.71075 10.80220 24.28850 25.51110 90.00000 98.00980 90.00000
ZERR  4 0.00230 0.00520 0.00530 0.00000 0.00340 0.00000
LATT 1
SYMM .50-X, .50+Y, .50-Z
SFAC C H CL O TI
UNIT 288 444 4 12 4
SHEL 6.790236 0.769625
L.S. 10
FMAP 2
PLAN 25
WPDB -2
HTAB
BOND $H
CONF
LIST 4
TEMP -172.8
ACTA
SIZE 0.247 0.194 0.134
SIMU C41 C41B
SIMU C43 C43B
WGHT    0.058000    8.601301
FVAR       0.71073   0.57404   0.66254   0.26401   0.36297   0.50000
TI1   5    0.297199    0.251780    0.732843    11.00000    0.02994    0.05701 =
         0.02901   -0.01326    0.00403    0.00842
CL1   3    0.099353    0.223639    0.733457    11.00000    0.02922    0.08038 =
         0.06164   -0.03804    0.00517    0.00265
O1    4    0.343150    0.289839    0.792550    11.00000    0.03236    0.04118 =
         0.02828   -0.00753    0.00660    0.00045
O2    4    0.296163    0.293865    0.675557    11.00000    0.04825    0.07731 =
         0.02730   -0.00567    0.00687    0.02488
O3    4    0.385301    0.190607    0.727591    11.00000    0.02607    0.05150 =
         0.03499   -0.01207    0.00603    0.00685
C1    1    0.398110    0.302902    0.843221    11.00000    0.02822    0.03384 =
         0.02416   -0.00529    0.00534    0.00362
C2    1    0.488658    0.345027    0.851897    11.00000    0.02917    0.02869 =
         0.03262    0.00028    0.01062    0.00214
C3    1    0.525431    0.389463    0.814175    11.00000    0.03606    0.03640 =
         0.04193    0.00109    0.01382   -0.00149
C4    1    0.639539    0.417012    0.847796    11.00000    0.04453    0.03234 =
         0.05689   -0.00183    0.02393   -0.00575
AFIX  23
H4A   2    0.717994    0.403284    0.836520    11.00000   -1.20000
H4B   2    0.635961    0.457406    0.842621    11.00000   -1.20000
AFIX   0
C5    1    0.637173    0.403144    0.906714    11.00000    0.03732    0.03615 =
         0.04519   -0.01068    0.01684   -0.01229
C6    1    0.547747    0.354572    0.903196    11.00000    0.03048    0.02815 =
         0.03651   -0.00533    0.01011   -0.00215
C7    1    0.519479    0.323575    0.945787    11.00000    0.03402    0.03939 =
         0.02932   -0.00162    0.00405   -0.00213
AFIX  43
H7    2    0.563459    0.329376    0.980259    11.00000   -1.20000
AFIX   0
C8    1    0.426250    0.284106    0.937236    11.00000    0.03330    0.03096 =
         0.03220    0.00207    0.00941    0.00082
C9    1    0.380295    0.247659    0.978717    11.00000    0.03918    0.04320 =
         0.03230    0.00029    0.01085   -0.00424
C10   1    0.253244    0.227087    0.949371    11.00000    0.04204    0.04175 =
         0.03749    0.00137    0.01239   -0.00967
AFIX  23
H10A  2    0.183870    0.247442    0.962137    11.00000   -1.20000
H10B  2    0.242803    0.187430    0.956582    11.00000   -1.20000
AFIX   0
C11   1    0.250013    0.236467    0.888984    11.00000    0.02937    0.03136 =
         0.03628   -0.00710    0.00835   -0.00528
C12   1    0.361929    0.274867    0.886934    11.00000    0.02838    0.02575 =
         0.03269   -0.00565    0.00761   -0.00169
C13   1    0.560914    0.369655    0.761437    11.00000    0.05210    0.06333 =
         0.04148    0.00332    0.01662   -0.01114
AFIX 137
H13A  2    0.627743    0.342193    0.767996    11.00000   -1.50000
H13B  2    0.590050    0.400969    0.742237    11.00000   -1.50000
H13C  2    0.487717    0.353093    0.740234    11.00000   -1.50000
AFIX   0
C14   1    0.417117    0.430486    0.802585    11.00000    0.05278    0.05702 =
         0.08561    0.03534    0.02953    0.01225
AFIX 137
H14A  2    0.342936    0.411347    0.784936    11.00000   -1.50000
H14B  2    0.440669    0.459834    0.779533    11.00000   -1.50000
H14C  2    0.398545    0.446488    0.835884    11.00000   -1.50000
AFIX   0
C15   1    0.766555    0.387461    0.935573    11.00000    0.04010    0.05549 =
         0.05097   -0.01553    0.01044   -0.01791
AFIX  23
H15A  2    0.823790    0.418833    0.932797    11.00000   -1.20000
H15B  2    0.759511    0.382515    0.973564    11.00000   -1.20000
AFIX   0
C16   1    0.826786    0.335838    0.916265    11.00000    0.04113    0.06436 =
         0.06337   -0.00807    0.01305   -0.00290
AFIX 137
H16A  2    0.772676    0.304019    0.919642    11.00000   -1.50000
H16B  2    0.908261    0.329801    0.937673    11.00000   -1.50000
H16C  2    0.838114    0.340534    0.879076    11.00000   -1.50000
AFIX   0
C17   1    0.580900    0.450247    0.937056    11.00000    0.05111    0.03577 =
         0.06961   -0.02208    0.02753   -0.01640
AFIX  23
H17A  2    0.496247    0.458608    0.918544    11.00000   -1.20000
H17B  2    0.571181    0.436651    0.972839    11.00000   -1.20000
AFIX   0
C18   1    0.656111    0.504197    0.943156    11.00000    0.06912    0.04393 =
         0.09075   -0.02882    0.03719   -0.01995
AFIX 137
H18A  2    0.736099    0.497754    0.965573    11.00000   -1.50000
H18B  2    0.608589    0.532181    0.959556    11.00000   -1.50000
H18C  2    0.671561    0.517026    0.908228    11.00000   -1.50000
AFIX   0
C19   1    0.468384    0.197791    0.990931    11.00000    0.05295    0.04366 =
         0.04537    0.00789    0.00923    0.00087
AFIX  23
H19A  2    0.431656    0.173275    1.015671    11.00000   -1.20000
H19B  2    0.469935    0.177031    0.957633    11.00000   -1.20000
AFIX   0
C20   1    0.602231    0.209957    1.014454    11.00000    0.05305    0.06139 =
         0.06171    0.02180    0.00324    0.00170
AFIX 137
H20A  2    0.641700    0.232875    0.989844    11.00000   -1.50000
H20B  2    0.648485    0.175319    1.020646    11.00000   -1.50000
H20C  2    0.603073    0.229545    1.048086    11.00000   -1.50000
AFIX   0
C21   1    0.363946    0.279154    1.029723    11.00000    0.04851    0.05856 =
         0.02827    0.00000    0.01040   -0.00728
AFIX  23
H21A  2    0.326298    0.253865    1.053522    11.00000   -1.20000
H21B  2    0.447773    0.289550    1.047805    11.00000   -1.20000
AFIX   0
C22   1    0.283644    0.331041    1.022142    11.00000    0.06445    0.06182 =
         0.04072   -0.01037    0.01742    0.00779
AFIX 137
H22A  2    0.318676    0.356273    0.998078    11.00000   -1.50000
H22B  2    0.282549    0.349084    1.056435    11.00000   -1.50000
H22C  2    0.198166    0.321070    1.007049    11.00000   -1.50000
AFIX   0
C23   1    0.260523    0.180856    0.860947    11.00000    0.03675    0.03046 =
         0.05132   -0.00638    0.00995   -0.00435
AFIX 137
H23A  2    0.271936    0.187325    0.824005    11.00000   -1.50000
H23B  2    0.183981    0.159496    0.862095    11.00000   -1.50000
H23C  2    0.332340    0.160359    0.878897    11.00000   -1.50000
AFIX   0
C24   1    0.127655    0.265343    0.867099    11.00000    0.03279    0.03893 =
         0.04367   -0.00914    0.01298   -0.00315
AFIX 137
H24A  2    0.119862    0.299561    0.886731    11.00000   -1.50000
H24B  2    0.056953    0.241127    0.871006    11.00000   -1.50000
H24C  2    0.127845    0.273822    0.829553    11.00000   -1.50000
AFIX   0
C25   1    0.300492    0.338437    0.642312    11.00000    0.05235    0.06608 =
         0.02379   -0.01013    0.00176    0.01547
C26   1    0.212397    0.381583    0.641987    11.00000    0.04698    0.09259 =
         0.02871   -0.01798   -0.00122    0.02833
C27   1    0.091870    0.384116    0.667142    11.00000    0.06402    0.11904 =
         0.02655   -0.00081    0.00235    0.04590
DFIX 1.54 0.002 C27 C28 C27 C28B C28 C29 C28B C29
EADP C28 C28B
ISOR 0.01 0.01 C28 C28B
PART 1 41.0
C28   1    0.050790    0.444335    0.656704    41.00000    0.09948    0.12936 =
         0.07067    0.02681    0.02490    0.07535
AFIX  23
H28A  2   -0.037549    0.445150    0.639944    41.00000   -1.20000
H28B  2    0.056525    0.464251    0.690816    41.00000   -1.20000
AFIX   0
PART 2 -41.0
C28B  1    0.036367    0.439564    0.645912   -41.00000    0.09948    0.12936 =
         0.07067    0.02681    0.02490    0.07535
AFIX  23
H28C  2    0.008854    0.460770    0.675358   -41.00000   -1.20000
H28D  2   -0.037837    0.432660    0.619292   -41.00000   -1.20000
AFIX   0
PART 0
C29   1    0.132594    0.473687    0.620464    11.00000    0.06769    0.07441 =
         0.07627   -0.02789   -0.00590    0.02970
C30   1    0.224403    0.427809    0.610632    11.00000    0.06013    0.06592 =
         0.03868   -0.01088   -0.00418    0.02390
C31   1    0.316214    0.431651    0.578442    11.00000    0.05976    0.05411 =
         0.05043   -0.01550   -0.00344    0.00695
AFIX  43
H31   2    0.323410    0.463763    0.557822    11.00000   -1.20000
AFIX   0
C32   1    0.398654    0.387634    0.576541    11.00000    0.04698    0.04378 =
         0.04477   -0.01447   -0.00008    0.00387
C33   1    0.503820    0.384262    0.542741    11.00000    0.04942    0.05146 =
         0.04321   -0.00364    0.00174    0.00669
C34   1    0.556943    0.327695    0.555737    11.00000    0.09708    0.03367 =
         0.11370    0.00423    0.06882    0.00666
AFIX  23
H34A  2    0.648030    0.330745    0.567342    11.00000   -1.20000
H34B  2    0.544261    0.304583    0.523469    11.00000   -1.20000
AFIX   0
C35   1    0.495152    0.299650    0.599570    11.00000    0.04904    0.04877 =
         0.03438   -0.00582    0.01128    0.00893
C36   1    0.392957    0.341487    0.608371    11.00000    0.04384    0.05265 =
         0.02779   -0.01658    0.00273    0.00449
C37   1    0.001906    0.337615    0.643625    11.00000    0.03854    0.25130 =
         0.04003   -0.03961   -0.00166    0.01649
AFIX 137
H37A  2   -0.014096    0.341371    0.605026    11.00000   -1.50000
H37B  2   -0.077146    0.340458    0.658188    11.00000   -1.50000
H37C  2    0.040256    0.301706    0.652839    11.00000   -1.50000
AFIX   0
C38   1    0.106101    0.378703    0.727990    11.00000    0.05671    0.07857 =
         0.03374   -0.01098    0.00477    0.03031
AFIX 137
H38A  2    0.147139    0.343709    0.738753    11.00000   -1.50000
H38B  2    0.023340    0.379711    0.739555    11.00000   -1.50000
H38C  2    0.156857    0.409252    0.744281    11.00000   -1.50000
AFIX   0
C39   1    0.064531    0.494786    0.568614    11.00000    0.08246    0.06761 =
         0.08456    0.02759    0.02911    0.03856
AFIX  23
H39A  2    0.018739    0.463773    0.549619    11.00000   -1.20000
H39B  2    0.127044    0.507972    0.546586    11.00000   -1.20000
AFIX   0
C40   1   -0.028777    0.541740    0.574194    11.00000    0.09069    0.07219 =
         0.12532    0.01433    0.02849    0.04160
AFIX 137
H40A  2   -0.092297    0.528962    0.595311    11.00000   -1.50000
H40B  2   -0.069273    0.552854    0.539011    11.00000   -1.50000
H40C  2    0.015928    0.573252    0.591806    11.00000   -1.50000
AFIX   0
DFIX 1.54 0.002 C29 C41 C29 C41B C41 C42 C41B C42B
EADP C41 C41B
EADP C42 C42B
ISOR 0.01 0.01 C42 C42B
PART 1 21.0
C41   1    0.185297    0.505745    0.670739    21.00000    0.06894    0.04828 =
         0.05708   -0.00290    0.01290    0.02038
AFIX  23
H41A  2    0.121910    0.531619    0.680881    21.00000   -1.20000
H41B  2    0.209861    0.480096    0.700535    21.00000   -1.20000
AFIX   0
C42   1    0.300096    0.537437    0.657116    21.00000    0.09802    0.05175 =
         0.07530   -0.01426    0.02030    0.00055
AFIX 137
H42A  2    0.367801    0.511430    0.653583    21.00000   -1.50000
H42B  2    0.327827    0.563791    0.685416    21.00000   -1.50000
H42C  2    0.277721    0.557261    0.623680    21.00000   -1.50000
AFIX   0
PART 2 -21.0
C41B  1    0.204266    0.528066    0.633804   -21.00000    0.06894    0.04828 =
         0.05708   -0.00290    0.01290    0.02038
AFIX  23
H41C  2    0.232945    0.541799    0.600994   -21.00000   -1.20000
H41D  2    0.144457    0.555444    0.644332   -21.00000   -1.20000
AFIX   0
C42B  1    0.318112    0.526304    0.677444   -21.00000    0.09802    0.05175 =
         0.07530   -0.01426    0.02030    0.00055
AFIX 137
H42D  2    0.294862    0.507853    0.708814   -21.00000   -1.50000
H42E  2    0.345646    0.563941    0.686707   -21.00000   -1.50000
H42F  2    0.386267    0.505996    0.664577   -21.00000   -1.50000
AFIX   0
PART 0
ISOR 0.01 0.01 C44 C44B
PART 1 31.0
C43   1    0.464295    0.402785    0.483875    31.00000    0.05374    0.06701 =
         0.05486    0.01066   -0.00138    0.00751
AFIX  23
H43A  2    0.450943    0.443118    0.483344    31.00000   -1.20000
H43B  2    0.534371    0.395078    0.463745    31.00000   -1.20000
AFIX   0
C44   1    0.347943    0.375575    0.455732    31.00000    0.06197    0.08420 =
         0.04552   -0.00048    0.00410   -0.00763
AFIX 137
H44A  2    0.359764    0.335569    0.455814    31.00000   -1.50000
H44B  2    0.332001    0.388831    0.419130    31.00000   -1.50000
H44C  2    0.276556    0.384667    0.473987    31.00000   -1.50000
AFIX   0
PART 2 -31.0
C43B  1    0.448819    0.359367    0.487132   -31.00000    0.05047    0.02550 =
         0.04105    0.00377    0.00876    0.01011
AFIX  23
H43C  2    0.517173    0.347314    0.467653   -31.00000   -1.20000
H43D  2    0.394662    0.327325    0.491662   -31.00000   -1.20000
AFIX   0
C44B  1    0.372810    0.405605    0.457056   -31.00000    0.05832    0.05626 =
         0.05960   -0.00487    0.00527    0.01097
AFIX 137
H44D  2    0.311864    0.419932    0.478692   -31.00000   -1.50000
H44E  2    0.328788    0.391147    0.423710   -31.00000   -1.50000
H44F  2    0.429170    0.435305    0.449535   -31.00000   -1.50000
AFIX   0
PART 0
C45   1    0.598177    0.429451    0.559754    11.00000    0.07714    0.03460 =
         0.16905   -0.01783    0.04376   -0.00473
AFIX  23
H45A  2    0.627705    0.425079    0.598039    11.00000   -1.20000
H45B  2    0.554938    0.465407    0.554888    11.00000   -1.20000
AFIX   0
C46   1    0.712277    0.430976    0.530355    11.00000    0.08474    0.06150 =
         0.24083    0.00440    0.07666    0.00354
AFIX 137
H46A  2    0.759020    0.396456    0.536491    11.00000   -1.50000
H46B  2    0.766178    0.461917    0.543391    11.00000   -1.50000
H46C  2    0.684721    0.435532    0.492351    11.00000   -1.50000
AFIX   0
C47   1    0.442104    0.244303    0.581154    11.00000    0.06166    0.03631 =
         0.07926    0.00131    0.02590    0.00692
AFIX 137
H47A  2    0.508544    0.221404    0.570097    11.00000   -1.50000
H47B  2    0.375769    0.249457    0.551202    11.00000   -1.50000
H47C  2    0.407579    0.226135    0.610212    11.00000   -1.50000
AFIX   0
C48   1    0.589237    0.291593    0.648937    11.00000    0.05656    0.19565 =
         0.04908   -0.02911    0.00058    0.06051
AFIX 137
H48A  2    0.548672    0.273108    0.676152    11.00000   -1.50000
H48B  2    0.621016    0.327505    0.662176    11.00000   -1.50000
H48C  2    0.658811    0.268961    0.640380    11.00000   -1.50000
AFIX   0
C49   1    0.455344    0.146667    0.713084    11.00000    0.02563    0.04414 =
         0.02784   -0.00012    0.00886    0.00385
C50   1    0.403985    0.109437    0.674180    11.00000    0.02379    0.03905 =
         0.02832    0.00338    0.00619    0.00343
C51   1    0.268278    0.102753    0.647365    11.00000    0.02723    0.03819 =
         0.03236   -0.00575    0.00576    0.00354
C52   1    0.278808    0.056687    0.605705    11.00000    0.03136    0.03851 =
         0.03944   -0.00740    0.00886   -0.00011
AFIX  23
H52A  2    0.211462    0.029242    0.606808    11.00000   -1.20000
H52B  2    0.269642    0.072832    0.569740    11.00000   -1.20000
AFIX   0
C53   1    0.408346    0.028376    0.618443    11.00000    0.02817    0.03163 =
         0.04605   -0.00259    0.01294    0.00183
C54   1    0.476951    0.066056    0.660097    11.00000    0.02614    0.03761 =
         0.03954    0.00643    0.01259    0.00075
C55   1    0.599376    0.059321    0.683150    11.00000    0.02747    0.03478 =
         0.05138    0.00655    0.01393    0.00855
AFIX  43
H55   2    0.648851    0.030219    0.672333    11.00000   -1.20000
AFIX   0
C56   1    0.649101    0.095939    0.722548    11.00000    0.02627    0.04577 =
         0.04250    0.01136    0.00847    0.00274
C57   1    0.781717    0.095348    0.750737    11.00000    0.02789    0.05868 =
         0.05013    0.00954    0.00198    0.00883
C58   1    0.783269    0.143861    0.789960    11.00000    0.03078    0.10036 =
         0.02536   -0.00192    0.00090    0.00794
AFIX  23
H58A  2    0.845108    0.171687    0.782129    11.00000   -1.20000
H58B  2    0.808247    0.130451    0.826551    11.00000   -1.20000
AFIX   0
C59   1    0.650554    0.170689    0.785192    11.00000    0.02689    0.07259 =
         0.02933   -0.00199    0.00421    0.00435
C60   1    0.578699    0.139715    0.738194    11.00000    0.02556    0.04912 =
         0.02790    0.00490    0.00579    0.00338
C61   1    0.190144    0.082495    0.689492    11.00000    0.02585    0.06208 =
         0.04477   -0.00761    0.01305   -0.00153
AFIX 137
H61A  2    0.228567    0.049310    0.706521    11.00000   -1.50000
H61B  2    0.105160    0.073959    0.672651    11.00000   -1.50000
H61C  2    0.186885    0.111300    0.716165    11.00000   -1.50000
AFIX   0
C62   1    0.205642    0.152970    0.618771    11.00000    0.03824    0.04928 =
         0.03612   -0.01103   -0.00760    0.00928
AFIX 137
H62A  2    0.198641    0.182418    0.644453    11.00000   -1.50000
H62B  2    0.122058    0.142825    0.601424    11.00000   -1.50000
H62C  2    0.256099    0.165836    0.592117    11.00000   -1.50000
AFIX   0
C63   1    0.396169   -0.029853    0.641876    11.00000    0.04424    0.03556 =
         0.05875    0.00519    0.02286    0.00217
AFIX  23
H63A  2    0.480943   -0.043424    0.655567    11.00000   -1.20000
H63B  2    0.348937   -0.026832    0.672338    11.00000   -1.20000
AFIX   0
C64   1    0.331857   -0.072556    0.603459    11.00000    0.06166    0.03352 =
         0.07966   -0.00851    0.03162   -0.00807
AFIX 137
H64A  2    0.252294   -0.057699    0.586011    11.00000   -1.50000
H64B  2    0.316180   -0.106029    0.622951    11.00000   -1.50000
H64C  2    0.385800   -0.081362    0.576745    11.00000   -1.50000
AFIX   0
C65   1    0.476251    0.025183    0.569006    11.00000    0.03883    0.03256 =
         0.04740   -0.00362    0.02043    0.00311
AFIX  23
H65A  2    0.550499    0.001185    0.577220    11.00000   -1.20000
H65B  2    0.419666    0.007592    0.539928    11.00000   -1.20000
AFIX   0
C66   1    0.518313    0.080607    0.549657    11.00000    0.04418    0.03948 =
         0.04509   -0.00389    0.01826   -0.00538
AFIX 137
H66A  2    0.446071    0.105241    0.542558    11.00000   -1.50000
H66B  2    0.555429    0.075275    0.517095    11.00000   -1.50000
H66C  2    0.580474    0.096927    0.576881    11.00000   -1.50000
AFIX   0
C67   1    0.817520    0.039237    0.774773    11.00000    0.05446    0.11190 =
         0.12634    0.05231   -0.02163    0.00563
AFIX  23
H67A  2    0.825020    0.013678    0.745151    11.00000   -1.20000
H67B  2    0.901994    0.042837    0.795237    11.00000   -1.20000
AFIX   0
C68   1    0.742111    0.013842    0.807469    11.00000    0.09001    0.15835 =
         0.11943    0.06584   -0.01403    0.01212
AFIX 137
H68A  2    0.738267    0.036741    0.838830    11.00000   -1.50000
H68B  2    0.777123   -0.022254    0.818430    11.00000   -1.50000
H68C  2    0.657733    0.009120    0.788216    11.00000   -1.50000
AFIX   0
C69   1    0.873612    0.105640    0.710601    11.00000    0.02605    0.08676 =
         0.07385   -0.04041    0.01515   -0.00404
AFIX  23
H69A  2    0.958202    0.111085    0.730460    11.00000   -1.20000
H69B  2    0.876451    0.072155    0.688673    11.00000   -1.20000
AFIX   0
C70   1    0.843350    0.154358    0.674073    11.00000    0.04124    0.16083 =
         0.04040   -0.00081    0.00923   -0.03369
AFIX 137
H70A  2    0.763448    0.147948    0.651582    11.00000   -1.50000
H70B  2    0.909590    0.158947    0.651806    11.00000   -1.50000
H70C  2    0.837416    0.187725    0.695178    11.00000   -1.50000
AFIX   0
C71   1    0.588927    0.159500    0.835069    11.00000    0.03916    0.12386 =
         0.02844    0.00398    0.01044    0.01817
AFIX 137
H71A  2    0.503984    0.174616    0.830170    11.00000   -1.50000
H71B  2    0.638181    0.177054    0.865721    11.00000   -1.50000
H71C  2    0.585404    0.119709    0.841052    11.00000   -1.50000
AFIX   0
C72   1    0.658956    0.232592    0.777725    11.00000    0.03437    0.07738 =
         0.04722   -0.01922   -0.00222   -0.00130
AFIX 137
H72A  2    0.695261    0.240337    0.745377    11.00000   -1.50000
H72B  2    0.711948    0.248673    0.808194    11.00000   -1.50000
H72C  2    0.575076    0.248681    0.774790    11.00000   -1.50000

AFIX   0
HKLF 4

REM  (EMindO)3TiCl 031714
REM R1 =  0.1190 for   11966 Fo > 4sig(Fo)  and  0.1472 for all   15177 data
REM    752 parameters refined using     56 restraints

END

WGHT      0.0580      8.6033

REM No hydrogen bonds found for HTAB generation

REM Highest difference peak  0.624,  deepest hole -0.530,  1-sigma level  0.058
Q1    1   0.8045  0.0581  0.8114  11.00000  0.05    0.62
Q2    1   0.2194  0.5402  0.6406  11.00000  0.05    0.55
Q3    1   0.0788  0.4643  0.6636  11.00000  0.05    0.48
Q4    1   0.9225  0.0336  0.8195  11.00000  0.05    0.47
Q5    1   0.0094  0.4195  0.6461  11.00000  0.05    0.38
Q6    1   0.8066 -0.0064  0.7882  11.00000  0.05    0.36
Q7    1   0.0784  0.4498  0.6140  11.00000  0.05    0.32
Q8    1   0.6216  0.3157  0.5402  11.00000  0.05    0.27
Q9    1   0.3294  0.2333  0.7609  11.00000  0.05    0.27
Q10   1   0.1128  0.4984  0.6640  11.00000  0.05    0.26
Q11   1   0.1435  0.2027  0.7641  11.00000  0.05    0.26
Q12   1   0.0900  0.2904  0.7319  11.00000  0.05    0.26
Q13   1   0.6064  0.4622  0.5783  11.00000  0.05    0.25
Q14   1   0.0052  0.3193  0.6279  11.00000  0.05    0.25
Q15   1   0.2923  0.2730  0.7886  11.00000  0.05    0.24
Q16   1   0.5431  0.3580  0.5505  11.00000  0.05    0.24
Q17   1  -0.1081  0.5190  0.5859  11.00000  0.05    0.24
Q18   1   0.5889  0.3343  0.5862  11.00000  0.05    0.24
Q19   1   0.5641  0.4073  0.8307  11.00000  0.05    0.24
Q20   1   0.4386  0.3865  0.5536  11.00000  0.05    0.23
Q21   1   0.3525  0.4304  0.8236  11.00000  0.05    0.22
Q22   1   0.1817  0.3158  1.0214  11.00000  0.05    0.22
Q23   1   0.2284  0.4269  0.5809  11.00000  0.05    0.22
Q24   1   0.2361  0.1253  0.6363  11.00000  0.05    0.22
Q25   1   0.5868  0.3020  0.6406  11.00000  0.05    0.21
;
_shelx_res_checksum   66492

_shelx_hkl_file
;
   0   0   2   -7.13    2.19
   0  -2   0  -10.89    4.34
   0   2   0  -14.29    5.07
   0   1   2   -8.06    2.35
   0  -1   2   -7.22    3.02
   0  -2   1   -9.82    2.59
   0   2   1   -8.08    2.23
   1   0   0   -5.06    2.48
   1   0  -1   -5.22    3.13
   1   1   0   -4.93    1.98
   1  -1   0   -2.79    1.94
   1   1  -1   -7.41    3.25
   1  -1  -1   -5.77    4.17
   1   0   1   -6.65    3.11
   1   0  -2   -2.22    3.31
   1  -1   1   -4.38    3.40
   1   1   1  -11.49    2.94
   0   2   2  -13.74    4.84
   0  -2   2  -12.24    3.53
   0   0   3    1.23    2.36
   1   1  -2   -1.38    6.04
   1  -1  -2   -5.64    7.63
   0   3   0  115.24   40.92
   0  -3   0  199.91   20.68
   0  -1   3  231.91   14.69
   0  -3   1  220.51   38.46
   0   3   1  261.57   11.32
   1   0   2    2.36    3.64
   1   2   1 1947.33  109.16
   1  -2   1 2444.59  110.26
   1   1   2 4183.52  187.97
   1  -1   2 4431.31  134.90
   1   2  -223070.64  301.97
   1  -2  -222325.22  366.81
   1   0  -3   13.34    5.46
   0  -2   346833.58   46.17
   1   1  -3  723.97   20.23
   1  -1  -3  727.83   20.49
   0  -3   2 8456.66   38.44
   0   3   2 8422.42   45.48
   1   2   2   38.55    7.36
   1  -2   2   27.62    4.85
   1  -3   019043.29  148.93
   1   3   019334.96  142.10
   1  -3  -123630.40  275.97
   1   3  -123791.76  214.71
   0   0   4 1261.84   22.61
   1   0   313245.88  106.84
   1  -2  -3 1005.53   29.47
   1   2  -3  986.60   29.86
   1   3   112596.87  107.81
   1  -3   112544.97   86.91
   0  -1   4 4184.25   60.04
   0   1   4 4210.74   60.29
   0   4   0  101.07   15.98
   0  -4   0   98.93   15.24
   1   1   324448.53  174.64
   1  -1   324440.96  165.99
   1  -3  -2 1409.96   32.32
   1   3  -2 1312.35   33.40
   0   4   1  701.08   21.25
   0  -4   1  685.27   21.19
   0  -3   3  685.86   26.29
   0   3   3  651.73   24.87
   1   0  -4   15.89    5.72
   1   1  -4  570.54   15.66
   1  -1  -4  575.91   13.01
   0   2   422684.84  247.06
   0  -2   422493.63  162.43
   1   3   2 6401.77   76.48
   1  -3   2 6390.43   75.93
   1   2   310402.96   65.47
   1  -2   310499.37   72.16
   0  -4   2  536.20   11.68
   0   4   2  464.79   13.36
   2   0  -1   19.48    6.39
   2   0   0 1006.50   26.40
   1  -3  -3   25.74    8.60
   1   3  -3   45.25    8.10
   1   4   0  358.61  118.74
   2  -1  -1 8331.03   64.58
   2   1  -1 8068.84   93.55
   1  -4  -130962.44  457.02
   1  -2  -423559.01  147.50
   1   2  -423219.06  179.70
   2   1   0  577.63   12.40
   2  -1   0  584.79   12.13
   2   0  -2 3645.29  131.70
   1   0   4    6.86    4.26
   1  -4   1 7194.17   79.07
   1   4   1 7061.81   76.76
   2   0   1   57.26   12.48
   2   1  -2 7031.17   82.36
   2  -1  -2 7261.67   84.68
   0   0   5    6.76    3.73
   1   1   411636.42   71.86
   1  -1   411504.35   87.54
   1   4  -211740.75   93.89
   1  -4  -211849.90  109.76
   2   1   1 7255.67   85.78
   2  -1   1 7186.54   77.95
   0  -3   4  210.27   11.33
   0   3   4  205.55   13.73
   0   1   5   12.16    8.44
   0  -1   5   20.27    5.34
   1   3   3 2815.05   83.50
   1  -3   3 2811.11   55.85
   0  -4   3 1004.72   27.19
   0   4   3 1015.31   31.67
   2  -2  -1 7290.64   79.25
   2   2  -1 7377.66   86.53
   2  -2   0  563.70   17.24
   2   2   0  558.12   17.00
   0   5   0  -17.39   13.50
   0  -5   0    5.14   17.54
   1   0  -5 4748.24   58.22
   2   0  -3    3.37    8.14
   2   2  -2 1866.83   38.68
   2  -2  -2 1880.29   40.09
   0  -5   1  801.92   23.47
   0   5   1  816.64   24.25
   1  -4   2 2979.93   52.90
   1   4   2 3004.68   52.17
   1  -1  -5 5961.38   70.91
   1   1  -5 5992.37   67.91
   2   1  -322975.76  135.05
   2  -1  -322678.10  161.89
   1   2   4  452.42   10.35
   1  -2   4  474.33   23.36
   1   3  -414301.71  158.67
   1  -3  -414169.94   93.21
   2   0   223123.37  219.57
   2  -2   1 8841.97   64.01
   2   2   1 8814.90   55.00
   0   2   5 1200.33   37.83
   0  -2   5 1188.25   44.24
   1  -4  -313827.91  132.38
   1   4  -314022.44  122.97
   2   1   2  734.83   35.12
   2  -1   2  664.81   35.99
   0  -5   2   40.83    7.73
   0   5   2   24.84    6.70
   1  -2  -537594.30  118.76
   1   2  -537493.93   79.40
   2   2  -3 1749.14   39.62
   2  -2  -3 1748.01   35.10
   2   3  -1   34.81    8.29
   2  -3  -1   38.85    5.94
   2   3   010687.84  107.02
   2  -3   010548.10  102.25
   1   5   0  334.07   15.34
   1  -5   0  331.36   17.48
   1   5  -1 6239.35   83.64
   1  -5  -1 6165.62   68.48
   2   0  -4   53.20    9.10
   2   2   2   50.62   10.31
   2  -2   2   28.99    7.05
   0  -4   4 1264.52   42.34
   0   4   4 1229.73   20.92
   2   3  -2 1989.60  126.06
   2  -3  -2 1971.08   72.65
   1  -4   323222.51  200.88
   1   4   323904.93  185.84
   1   0   553317.57   75.94
   1   3   4 2691.41   50.83
   1  -3   4 2763.28   55.56
   2   1  -4 2218.39   42.27
   2  -1  -4 2235.11   41.39
   1   5   1 2226.39   48.18
   1  -5   1 2280.83   42.18
   2   3   1 9130.09  106.51
   2  -3   1 8876.40   67.98
   0   3   5  436.33   15.88
   0  -3   5  464.61   18.59
   1   1   5  444.59   20.14
   1  -1   5  421.10   10.34
   2   0   3    2.73    7.04
   1  -5  -2 2223.59   26.22
   1   5  -2 2214.56   25.93
   0   0   6 5097.10   80.14
   0  -5   315477.00  146.54
   0   5   315388.64  133.08
   1   4  -4 2064.79   45.37
   1  -4  -4 2143.19   49.57
   2   1   3   22.46    4.77
   2  -1   3   11.54    9.08
   1   3  -5 3616.76   57.27
   1  -3  -5 3488.61   66.35
   0   1   6 2018.34   44.32
   0  -1   6 2001.08   46.55
   2   3  -3  817.42   26.21
   2  -3  -3  839.77   30.49
   2  -2  -4 1662.61   35.98
   2   2  -4 1670.72   36.59
   1   0  -6    0.02    7.19
   1   5   2 2640.95   46.02
   1  -5   2 2687.85   45.43
   1   2   5  858.09   23.93
   1  -2   5  893.35   37.57
   2   3   2  488.45   18.59
   2  -3   2  505.02   15.17
   1   1  -6   14.08    6.21
   1  -1  -6   18.58    7.26
   0  -6   0 8902.94  153.10
   0   6   0 8930.80  128.97
   2   4  -1 2802.06   49.53
   2  -4  -1 2834.14   47.91
   2   2   3 1550.62   35.44
   2  -2   3 1570.74   34.23
   2  -4   0 3725.27   65.08
   2   4   0 3562.17   62.52
   1   5  -3 4599.56   64.26
   1  -5  -3 4583.86   54.23
   0   6   1  414.83   17.26
   0  -6   1  463.68   15.99
   0  -2   6 1051.87   30.17
   0   2   6 1052.49   31.45
   2   0  -5   -2.93    6.93
   2   4  -2 8729.00   86.03
   2  -4  -2 8890.71   66.63
   1  -4   4 1419.06   30.51
   1   4   4 1405.90   35.88
   2  -1  -5 1164.81   27.12
   2   1  -5 1147.01   32.38
   2   4   1 4018.01   77.73
   2  -4   1 3921.27   59.80
   1  -2  -6  243.22   17.68
   1   2  -6  225.11   18.75
   0   4   5 4859.31   58.57
   0  -4   5 4805.73   67.62
   2  -3  -4   27.78    7.08
   2   3  -4   32.18    6.45
   0   6   2 1621.09   37.29
   0  -6   2 1605.65   36.17
   0   5   4  833.65   28.03
   0  -5   4  848.81   31.44
   2   0   4  255.33   16.35
   1   5   3 1755.15   40.39
   1  -5   3 1718.02   38.79
   1  -3   519630.74  123.62
   1   3   519521.90  167.28
   1   6   0   11.05    4.74
   1  -6   0    7.10    6.19
   1  -4  -515857.25  150.83
   1   4  -516060.27  166.07
   2  -1   4  666.64   22.91
   2   1   4  665.81   20.48
   2   4  -323920.20  262.68
   2  -4  -323928.09  268.29
   1  -6  -1  171.44   14.84
   1   6  -1  195.35   15.96
   2   3   3 6647.29   84.00
   2  -3   3 6582.83   97.04
   2  -2  -5 8161.35   98.19
   2   2  -5 8336.71   49.76
   1   0   6   11.78    5.57
   0   3   6 1442.43   30.12
   0  -3   6 1430.91   43.60
   1   5  -4 5439.37   61.29
   1  -5  -4 5319.46   60.55
   1   6   118571.29  237.60
   1  -6   118774.46  199.51
   2   4   2 4409.43   77.67
   2  -4   2 4240.29   26.55
   1   1   6 2003.97   45.31
   1  -1   6 1942.76   41.79
   1   6  -2   31.27    6.13
   1  -6  -2   47.44    9.17
   1   3  -6  334.23   16.62
   1  -3  -6  357.27   19.68
   2   2   4 6519.89   98.22
   2  -2   4 6497.81   67.98
   0   6   3  582.00   17.62
   0  -6   3  584.34   14.36
   0   0   7    1.18    4.61
   2  -5  -1 7100.60   82.74
   2   5  -1 7268.47  137.20
   3   0  -1  127.59   11.51
   2   5   0 1455.21   35.08
   2  -5   0 1414.58   62.00
   1   6   2   58.65   10.17
   1  -6   2   71.93    9.01
   1  -2   6 3898.42   73.94
   1   2   6 3937.75   80.63
   1   0  -710123.08  100.50
   0   1   7 3497.52   60.47
   0  -1   7 3446.49   60.66
   3   0   0   16.07    5.34
   3   0  -2   11.95    3.93
   3  -1  -1   98.73   18.83
   3   1  -1   85.78   11.01
   2  -4  -410769.64  130.31
   2   4  -410711.09   82.55
   2   0  -6 3929.28   65.43
   2   3  -5  597.49   24.28
   2  -3  -5  605.31   19.64
   2  -5  -2  806.96   33.01
   2   5  -2  786.14   27.14
   1  -1  -7 7203.47   91.67
   1   1  -7 7185.54   83.19
   1  -4   5 4593.98   57.81
   1   4   5 4534.57   55.62
   1   5   4  690.15   24.03
   1  -5   4  667.62   21.65
   3  -1   0 5829.07   57.87
   3   1   0 5791.94   73.61
   3   1  -2   10.95    6.03
   3  -1  -2    7.34    4.12
   2  -1  -6  125.88   14.75
   2   1  -6  121.35   13.62
   1  -6  -3  440.26   17.97
   1   6  -3  426.92   15.66
   2   5   1 2808.31   50.55
   2  -5   1 2825.42   56.15
   0   5   5 3761.47   72.62
   0  -5   5 3689.19   71.25
   2  -4   310713.63   71.35
   2   4   310622.20   89.51
   0  -7   0   41.09   15.82
   0   7   0   39.56   30.61
   3   0   1   22.83    6.26
   3   0  -3 5535.19   61.75
   0   4   6 3135.40   55.33
   0  -4   6 3139.40   55.54
   2   3   4 2128.11   41.93
   2  -3   4 2121.49   53.04
   0  -2   7 2602.70   46.81
   0   2   7 2656.02   46.55
   3   2  -1  265.89   11.52
   3  -2  -1  254.41   12.84
   2   0   5   16.33    5.67
   0  -7   1   13.00   10.47
   0   7   1  -11.80   13.02
   3  -1   1  564.87   11.65
   3   1   1  530.57   17.10
   1   2  -7  156.09   13.28
   1  -2  -7  156.86   13.93
   1   5  -5 2942.37   63.83
   1  -5  -5 2946.65   50.36
   3   1  -317287.75  212.68
   3  -1  -317441.59  222.90
   2   5  -3 8385.65  137.51
   2  -5  -3 8400.32   38.73
   3   2   0 1942.45   44.07
   3  -2   0 1874.17   38.40
   3   2  -2 5128.62   67.23
   3  -2  -2 5094.90   73.85
   2   2  -6  409.23   25.55
   2  -2  -6  352.19   20.35
   1   4  -611977.01  123.06
   1  -4  -611779.96  122.96
   0   6   4 6460.61   77.03
   0  -6   4 6399.54   82.96
   2   1   5 3369.80   89.96
   2  -1   5 3341.87   72.95
   1   3   6 2741.70   50.20
   1  -3   6 2735.47   60.34
   1  -6   3   11.35    7.72
   1   6   3   11.44    5.33
   2   5   2 2298.30   60.68
   2  -5   2 2316.27   41.11
   0  -7   2  341.28   20.98
   0   7   2  364.44   17.02
   3   2   1    6.24    5.52
   3  -2   1    5.99    6.28
   3  -2  -3    3.68   11.40
   3   2  -3    4.92    4.64
   1   6  -4 2371.63   44.27
   1  -6  -4 2340.37   55.83
   2   4  -5   83.55   12.82
   2  -4  -5  112.26   13.19
   3   0   2   17.09    5.17
   2  -2   5 2255.02   43.46
   2   2   5 2286.21   43.60
   3   0  -4   18.89    5.89
   1  -7   0 2499.97   43.32
   1   7   0 2528.89   43.17
   0   3   7 8378.78   58.64
   0  -3   7 8307.07   57.40
   1  -7  -1   14.45    5.76
   1   7  -1   22.38    6.38
   3   3  -115605.01  100.32
   3  -3  -115564.39  163.18
   1   0   725338.47  245.76
   3   1   2  187.03   18.14
   3  -1   2  184.24   15.11
   3   1  -4  179.78   12.07
   3  -1  -4  174.37   12.89
   1   3  -7 7297.10   82.08
   1  -3  -7 7231.15   81.70
   3  -3   0  244.67   19.95
   3   3   0  244.97   15.27
   3  -3  -2 8343.79   45.70
   3   3  -2 8450.67  112.71
   2   5  -4 2562.98   50.16
   2  -5  -4 2582.15   46.92
   2   3  -6 3170.23   78.70
   2  -3  -6 3131.04   63.72
   1  -7   1 1699.62   41.30
   1   7   1 1677.59   41.09
   1   1   710696.90  148.47
   1  -1   710779.49  107.57
   2   4   4 1494.71   39.98
   2  -4   4 1457.82   42.57
   1  -5   5  120.09   12.35
   1   5   5   90.34   13.92
   2   6  -1 6724.43   98.44
   2  -6  -1 6676.30   90.13
   2  -6   0 4783.04   62.23
   2   6   0 4855.09   73.03
   1  -7  -2  165.95   14.87
   1   7  -2  169.17   12.91
   0   7   310032.90   76.55
   0  -7   310066.18  112.77
   2   0  -7   20.14    7.09
   2  -5   3    6.27    3.30
   2   5   3    4.44    4.01
   3   2   2 8823.78   61.06
   3  -2   2 8748.24   78.39
   2  -6  -2  204.47   19.50
   2   6  -2  195.99   13.95
   3   2  -4 1222.03   20.52
   3  -2  -4 1222.98   20.49
   1  -4   610124.30  115.90
   1   4   610273.67   74.59
   3   3   1 8716.97   99.20
   3  -3   1 8715.08   81.88
   3  -3  -3 4026.39   70.95
   3   3  -3 3976.54   86.23
   0   5   6 2690.66   46.60
   0  -5   6 2666.52   50.95
   1  -6   4   29.69    6.17
   1   6   4    8.73    7.17
   2   1  -7  447.29   18.28
   2  -1  -7  472.50   15.65
   1  -2   7 2511.39   52.22
   1   2   7 2604.83   48.09
   2   6   1 2974.24   54.89
   2  -6   1 3050.41   52.06
   2   3   5   99.60   11.53
   2  -3   5  103.80   12.27
   1   7   2 9102.16   96.81
   1  -7   2 9207.37  101.65
   0  -6   5 4235.86   34.32
   0   6   5 4230.72   65.00
   0   0   8   96.31   13.03
   1   0  -8    7.29    7.78
   1  -5  -6   16.09    6.29
   1   5  -6   18.72    8.06
   0   1   8  769.79   29.62
   0  -1   8  746.06   34.51
   3   0   3  452.69   14.04
   3   0  -5  241.08   15.02
   1  -1  -8 3683.27   61.25
   1   1  -8 3689.18   67.00
   1   7  -3 2377.69   40.58
   1  -7  -3 2367.36   43.66
   3  -1   3 3557.78   67.89
   3   1   3 3741.18   61.71
   2   0   6 1292.28   26.17
   1  -6  -5 6436.46   73.59
   1   6  -5 6379.12   95.27
   2  -6  -3   31.21    7.60
   2   6  -3   12.94    4.84
   0   4   7 1436.11   31.89
   0  -4   7 1452.94   38.12
   3   1  -5  600.59   22.28
   3  -1  -5  589.53   13.96
   2  -2  -7   87.28   12.34
   2   2  -7   89.52   10.93
   3  -4  -1    5.34    5.33
   3   4  -1    7.20    4.66
   1   4  -7 7260.85  119.05
   1  -4  -7 7097.12   84.31
   2  -1   6   13.47    3.30
   2   1   6    8.31    5.50
   3   4   0 1532.10   34.68
   3  -4   0 1493.73   35.16
   3  -4  -2   35.57   10.76
   3   4  -2   20.23    5.46
   2   4  -6  758.70   29.28
   2  -4  -6  732.24   25.79
   2  -5  -5  623.75   41.26
   2   5  -5  613.42   36.50
   3   3   2   89.33   10.93
   3  -3   2   76.36   10.29
   2   6   2  558.85   15.00
   2  -6   2  545.89   16.64
   3   3  -4   -1.19    8.03
   3  -3  -4    7.14    3.43
   0  -2   818595.72  218.53
   0   2   818573.30  177.01
   1  -2  -8  189.54   18.59
   1   2  -8  205.79   19.17
   1   3   7 1216.03   31.30
   1  -3   7 1237.37   27.24
   0   7   4 8291.21   67.96
   0  -7   4 8360.65   98.94
   0   8   0   24.25   12.24
   0  -8   0   40.27   11.31
   3  -2   3  593.40   21.02
   3   2   3  588.25   17.90
   1  -7   3  258.57   16.32
   1   7   3  244.40   18.89
   3  -2  -5 1430.46   33.95
   3   2  -5 1493.58   61.81
   0  -8   1 1649.50   37.92
   0   8   1 1660.98   37.12
   3  -4   1 6032.87   78.21
   3   4   1 6148.14   64.88
   2  -2   6 2216.63   44.08
   2   2   6 2206.18   31.83
   3   4  -3  503.97   14.80
   3  -4  -3  444.45   23.21
   2  -5   4 2225.39   50.16
   2   5   4 2280.31   46.01
   2   4   5 3641.69   72.12
   2  -4   5 3651.28   65.45
   2  -3  -7 9226.46   62.53
   2   3  -7 9312.96  146.10
   1  -7  -4  234.30   15.72
   1   7  -4  263.04   20.71
   2   6  -4 2973.63   54.63
   2  -6  -4 3097.72   55.52
   1   5   6   32.24   10.08
   1  -5   6   29.51    5.66
   1  -6   5 1252.70   24.68
   1   6   5 1298.16   47.73
   0  -8   2 5177.20   81.51
   0   8   2 5152.31   60.30
   0   3   8 1939.02   41.42
   0  -3   8 1929.17   45.08
   1   3  -8 1912.82   43.66
   1  -3  -8 1876.95   45.47
   3   0   4   12.64    6.58
   2   6   3 4219.52   43.62
   2  -6   3 4194.20   31.26
   3   0  -6    3.52    6.45
   1   8   0   18.96    5.27
   1  -8   0   26.77    7.18
   1   0   8   11.29    5.12
   3  -3   3 4227.93   34.10
   3   3   3 4348.40   62.59
   0   6   6 4293.92   44.77
   0  -6   6 4286.25   50.24
   2  -7  -1 8463.18   67.71
   2   7  -1 8630.92   73.33
   3   3  -5 2428.00   58.52
   3  -3  -5 2420.42   40.26
   1  -8  -1   21.73    8.19
   1   8  -1   13.64    5.39
   3   1   4  153.62   15.70
   3  -1   4  133.84   16.15
   2  -7   0   16.59    7.12
   2   7   0   17.29    6.01
   3   1  -6 1270.77   29.06
   3  -1  -6 1293.87   39.44
   3  -4   2 7028.71   87.56
   3   4   2 7217.45   86.07
   3   4  -4  942.93   30.27
   3  -4  -4  982.59   30.66
   2   0  -8 1913.66   41.18
   1   1   8   12.67    6.65
   1  -1   8    0.06    2.67
   2   3   6 1620.33   52.12
   2  -3   6 1648.38   38.52
   0  -5   7  961.36   28.33
   0   5   7  923.42   27.73
   3  -5  -1 4920.04   64.19
   3   5  -1 4896.74   67.43
   1   8   1  181.63   14.70
   1  -8   1  202.18   14.38
   1   4   7  743.50   26.74
   1  -4   7  723.34   27.95
   1  -6  -6 1257.84   39.43
   1   6  -6 1212.61   35.01
   2  -7  -2 3080.21   82.14
   2   7  -2 3147.94   51.27
   2   1  -8 7424.27   99.70
   2  -1  -8 7478.26   90.24
   1   5  -7   33.76    8.89
   1  -5  -7   32.69    9.81
   1   7   4  637.59   26.27
   1  -7   4  702.04   22.88
   3  -5   0  302.75   10.70
   3   5   0  285.35   11.92
   3   5  -2 9733.08  146.66
   3  -5  -2 9810.40  108.89
   2   5  -610399.80  148.43
   2  -5  -610578.82   77.79
   1  -8  -2   19.62    6.22
   1   8  -2   30.80    6.99
   2  -7   1 1384.92   38.19
   2   7   1 1380.21   32.20
   0   7   5 2104.02   49.42
   0  -7   5 2165.70   33.04
   0  -8   3 1175.85   30.31
   0   8   3 1228.69   25.53
   3  -2   4 1089.18   34.34
   3   2   4 1182.53   24.28
   3   2  -6 1339.18   33.16
   3  -2  -6 1340.79   35.28
   1  -2   8  570.94   23.69
   1   2   8  563.89   18.27
   2   4  -7 1485.51   39.61
   2  -4  -7 1568.46   36.84
   2   6  -5  436.66   21.61
   2  -6  -5  411.31   18.08
   2   2  -8 1286.74   35.05
   2  -2  -8 1352.01   32.62
   1  -8   2   91.48   14.07
   1   8   2   82.38   10.70
   3  -5   1 1576.59   33.69
   3   5   1 1570.03   42.27
   1   7  -5  946.61   29.15
   1  -7  -5 1039.11   33.03
   3   5  -3 3631.58   59.71
   3  -5  -3 3649.01   62.03
   2   7  -3 1296.30   30.01
   2  -7  -3 1240.31   28.67
   2   0   7    5.69    4.90
   1   0  -9 4093.09   67.52
   2  -5   5  574.35   22.20
   2   5   5  620.02   26.39
   0   0   9   -3.16    6.87
   0  -4   8  409.37   23.85
   0   4   8  363.68   18.25
   2  -1   7  207.51   16.18
   2   1   7  190.75   19.94
   1   4  -8   16.34    5.97
   1  -4  -8   28.73    7.61
   1   1  -9  239.74   17.10
   1  -1  -9  194.32   15.77
   1  -8  -3 1037.91   36.32
   1   8  -3  990.38   32.10
   2  -7   2 2488.63   45.47
   2   7   2 2483.16   43.52
   0  -1   9   37.17    7.07
   0   1   9   38.13    9.44
   3  -4   3 1536.44   49.76
   3   4   3 1589.33   47.99
   2   6   4  462.34   22.79
   2  -6   4  473.75   18.04
   3   4  -5  440.20   19.17
   3  -4  -5  493.11   17.35
   2   4   6  331.66   19.58
   2  -4   6  342.50   17.25
   3   3   4 1839.90   44.25
   3  -3   4 1796.09   39.76
   3  -3  -6 1086.30   33.73
   3   3  -6 1075.57   32.63
   1   6   6  562.21   32.38
   1  -6   6  575.74   14.83
   1   3   8    9.79    6.34
   1  -3   8    8.74    8.09
   2   2   7   27.65    7.67
   2  -2   7   25.39    4.92
   1   2  -9 2533.05   44.19
   1  -2  -9 2477.99   44.31
   3   0   5 4324.40   74.28
   3  -5   2 6165.78   64.02
   3   5   2 6185.79  106.07
   0   8   4 6703.95   78.05
   0  -8   4 6738.50   79.51
   0  -2   9  419.56   17.12
   0   2   9  444.56   16.68
   3  -5  -4 5758.31   78.15
   3   5  -4 5723.94   65.23
   3   0  -7    2.38    7.25
   2   3  -8 1011.68   31.43
   2  -3  -8 1026.80   31.62
   1  -8   3   15.31    8.32
   1   8   3   12.11    6.00
   2  -7  -4 9255.96  116.20
   2   7  -4 9278.10  128.75
   3  -1   5  645.64   20.60
   3   1   5  609.74   18.64
   1   5   7 4231.02   29.59
   1  -5   7 4229.54   64.53
   3   1  -7  307.69   16.45
   3  -1  -7  270.01   16.33
   1   7   5 4290.30   84.63
   1  -7   5 4245.85   39.22
   4   0  -1   10.92    5.09
   0   9   0    3.51    9.53
   0  -9   0   17.29    9.25
   0   6   7 2852.93   52.09
   0  -6   7 2778.10   77.88
   4   0  -2 6637.10  109.13
   3   6  -1 1441.36   36.69
   3  -6  -1 1421.76   34.90
   1   8  -4  282.47   17.33
   1  -8  -4  269.74   20.96
   2   7   312185.69  207.60
   2  -7   312327.05   76.73
   0  -9   1   10.51    7.40
   0   9   1    4.85    8.57
   4  -1  -1 1057.72   37.29
   4   1  -1 1011.80   31.93
   1   6  -7 1871.72   50.76
   1  -6  -7 1883.85   42.98
   0   7   6 5023.78   58.40
   0  -7   6 4909.24   61.77
   4   1  -2 7844.91  120.51
   4  -1  -2 8032.11  162.64
   2   5  -7 1257.13   35.34
   2  -5  -7 1298.38   28.27
   3   6   0   57.37   11.52
   3  -6   0   56.59   16.57
   3  -6  -2  727.48   25.85
   3   6  -2  667.13   24.93
   4   0   0 3531.07   58.58
   2   6  -617100.81  157.07
   2  -6  -616893.79  185.08
   3   2   5 1800.54   38.68
   3  -2   5 1829.35   39.62
   3   2  -7   16.04    5.34
   3  -2  -7   -7.94    7.31
   2   3   7  511.67   18.18
   2  -3   7  507.90   21.69
   4  -1   010722.62   81.67
   4   1   010750.80  107.98
   4   0  -3    6.34    3.51
   1  -3  -9 4803.39   61.66
   1   3  -9 4937.66   67.32
   1   7  -6  739.44   25.66
   1  -7  -6  696.37   25.10
   0   3   9 1063.91   28.46
   0  -3   9 1005.80   33.27
   0   5   8 1761.24   40.89
   0  -5   8 1795.43   43.78
   2   8  -1 1488.89   35.00
   2  -8  -1 1435.90   35.05
   1  -5  -810014.02   73.59
   1   5  -8 9949.72   87.48
   3   4   4 7610.46  120.31
   3  -4   4 7651.38  114.37
   4  -1  -3  851.68   30.36
   4   1  -3  890.22   28.52
   2   0  -9    6.72    9.15
   2  -8   0 1198.70   18.61
   2   8   0 1096.45   33.05
   0   9   2  316.41   22.47
   0  -9   2  312.03   23.89
   3  -4  -6  314.95   16.15
   3   4  -6  314.24   25.23
   4   2  -1   93.02   11.06
   4  -2  -1   91.97   12.62
   3   6   1   26.24    7.31
   3  -6   1   33.45    6.75
   1   4   8 4307.66   58.49
   1  -4   8 4279.28  111.41
   3   5   3   76.98   11.92
   3  -5   3   84.78    9.07
   3   6  -3   16.98    6.98
   3  -6  -3   25.59    8.64
   4   2  -2  946.65   31.36
   4  -2  -2  927.01   35.28
   3   5  -5 7336.71  109.77
   3  -5  -5 7481.68  134.75
   1   0   9 2006.20   45.19
   2   1  -9 4846.36   59.79
   2  -1  -9 4800.10   60.45
   2   6   5 2640.18   55.55
   2  -6   5 2582.75   55.39
   4   0   1    3.81    5.24
   2  -8  -2  117.80   14.89
   2   8  -2  144.21   12.76
   2  -4  -8   83.50   13.95
   2   4  -8  110.68   12.54
   1   9   0 1654.48   42.46
   1  -9   0 1634.67   37.20
   2   5   6   38.22   10.66
   2  -5   6   47.00    8.89
   1   8   4   21.87    6.81
   1  -8   4   17.56    5.25
   1  -9  -1   49.37    9.43
   1   9  -1   62.87    9.15
   4   2   0 1201.04   23.08
   4  -2   0 1173.57   23.25
   1   1   910948.47  102.38
   1  -1   910950.14  112.38
   2  -7  -5  841.86   27.54
   2   7  -5  822.59   28.62
   2  -8   1 1484.09   35.62
   2   8   1 1395.99   35.47
   4  -1   1   21.06    4.98
   4   1   1    3.95    6.28
   0  -8   5 3907.62   61.06
   0   8   5 3897.63   69.66
   4   2  -3  323.02   24.71
   4  -2  -3  355.47   18.27
   4   0  -4 3936.43   77.00
   3  -3   5  845.89   33.06
   3   3   5  847.63   44.70
   1   9   1  636.47   26.67
   1  -9   1  665.38   25.13
   3   3  -7 2590.81   46.57
   3  -3  -7 2558.77   57.46
   2  -2  -9 3119.15   62.02
   2   2  -9 3040.91   54.97
   4   1  -4 2919.49   56.14
   4  -1  -4 3042.09   57.80
   1   9  -2 2212.92   42.11
   1  -9  -2 2193.65   42.82
   1  -8  -5  496.60   22.59
   1   8  -5  473.78   18.77
   2  -7   4 5036.23   96.84
   2   7   4 4957.13   96.19
   2  -8  -3  796.57   27.71
   2   8  -3  790.18   27.59
   0  -9   3  890.14   27.17
   0   9   3  849.61   26.12
   1  -2   9 1440.12   37.29
   1   2   9 1391.96   39.72
   2   0   8 5653.53   87.34
   3   6   2  667.34   26.96
   3  -6   2  693.75   21.25
   4   2   1   45.69   12.41
   4  -2   1   42.23    6.65
   3   6  -4 5261.62   69.34
   3  -6  -4 5287.12   85.33
   4   3  -1  705.40   24.28
   4  -3  -1  648.40   21.72
   4   3  -2 4188.67   45.82
   4  -3  -2 4174.47   42.94
   2   4   7  807.12   28.19
   2  -4   7  803.27   29.24
   2   1   8  265.37   18.29
   2  -1   8  281.12   15.75
   1   4  -9  869.45   29.16
   1  -4  -9  864.42   31.59
   3   0   6    4.89    4.38
   1   6   7   24.79   10.54
   1  -6   7   31.50    6.17
   2   8   2 1244.64   26.43
   2  -8   2 1276.61   36.89
   0  -4   9 1286.03   33.62
   0   4   9 1334.83   30.17
   3   0  -8   24.13    8.19
   4   0   2 7043.46   83.23
   1  -9   2 1391.00   38.01
   1   9   2 1444.38   35.93
   1   7   6 1007.80   34.87
   1  -7   6 1029.96   29.19
   4  -3   0 1276.74   35.86
   4   3   0 1334.34   35.88
   1   0 -10    8.87    6.57
   4   2  -4 7867.94   96.60
   4  -2  -4 7788.88  103.13
   3   1   6  364.09   18.63
   3  -1   6  375.37   19.74
   3   1  -8 9471.10  107.09
   3  -1  -8 9533.67  111.02
   4   1   2 2364.97   46.41
   4  -1   2 2415.75   48.80
   0   0  1012202.43  137.35
   4  -3  -3  680.95   31.94
   4   3  -3  711.04   16.52
   1  -1 -10 2790.79   52.47
   1   1 -10 2795.02   71.87
   1   9  -3  515.84   23.25
   1  -9  -3  547.67   17.45
   2   6  -7  579.17   19.68
   2  -6  -7  548.24   25.73
   4   0  -5   -1.10    4.04
   0   1  10 2516.89   48.58
   0  -1  10 2399.56   48.45
   3  -5   4 1323.37   32.65
   3   5   4 1332.41   41.62
   2   2   8  147.90   15.22
   2  -2   8  159.95   11.40
   2  -3  -9   18.85    6.84
   2   3  -9   29.19    8.44
   3  -5  -6  175.16   15.64
   3   5  -6  183.71   17.03
   1   5   8 7831.21   96.06
   1  -5   8 7915.55  109.99
   0  -7   7 1766.93   46.04
   0   7   7 1766.17   59.98
   4  -1  -5 1131.77   33.55
   4   1  -5 1154.70   33.13
   3   7  -1 1395.82   40.40
   3  -7  -1 1414.54   43.79
   1   3   9 1399.45   44.63
   1  -3   9 1268.95   37.60
   2  -8  -4  168.58   16.13
   2   8  -4  166.27   13.58
   3  -2   6  499.97   19.71
   3   2   6  504.50   21.52
   3  -4   5 2972.56   50.64
   3   4   5 3043.85   57.64
   4   3   1  698.36   22.62
   4  -3   1  702.74   15.54
   3   4  -7  100.63   23.36
   3  -4  -7  153.51   14.04
   3   2  -8  793.67   24.96
   3  -2  -8  836.77   26.21
   2   5  -8 8736.64  164.08
   2  -5  -8 8551.99   96.52
   4   2   2   36.52    7.64
   4  -2   2   32.81    5.78
   0   6   8  107.32   13.89
   0  -6   8  126.62   13.15
   1  -7  -7   26.66   10.36
   1   7  -7   31.18    7.99
   1  -8   5  833.31   22.68
   1   8   5  822.81   26.24
   3   7   0 2800.46   53.93
   3  -7   0 2903.08   57.30
   3   7  -2 5500.56   60.60
   3  -7  -2 5544.20   70.17
   1  -6  -8 1811.15   44.46
   1   6  -8 1839.31   47.12
   1  -2 -10    8.00    8.98
   1   2 -10   14.15    7.56
   2  -7  -6  451.34   22.42
   2   7  -6  475.21   26.49
   0   9   4   79.11   12.67
   0  -9   4   84.53   12.29
   3  -6   3    8.61    3.51
   3   6   3   -3.20    6.47
   1   9   3   11.30    6.82
   1  -9   3   13.27    6.99
   3  -6  -5  221.29   19.18
   3   6  -5  225.62   15.21
   0  -2  10  437.60   19.20
   0   2  10  409.18   19.72
   4  -3  -4 5506.92   83.66
   4   3  -4 5539.07   98.55
   2  -8   3  136.61   14.87
   2   8   3  126.53   13.22
   4   4  -1 2064.87   46.16
   4  -4  -1 2007.75   47.48
   2   6   6 1338.45   40.10
   2  -6   6 1261.55   35.67
   0  -8   6 6097.13   84.09
   0   8   6 5986.67  106.05
   4  -4  -2  139.03   12.89
   4   4  -2  151.81   13.55
   4   2  -5   22.64    6.38
   4  -2  -5   13.88    4.52
   4   0   3    4.81    5.00
   3  -7   1    5.33    4.80
   3   7   1   19.86    9.65
   3   7  -3  240.48   21.60
   3  -7  -3  256.08   18.78
   4  -4   0 2299.95   41.84
   4   4   0 2284.95   43.18
   1  -9  -4  255.90   19.85
   1   9  -4  259.31   21.16
   2   3   8  411.19   14.37
   2  -3   8  386.74   14.46
   1  -8  -6  509.42   18.18
   1   8  -6  512.29   22.51
   2  -7   5 1749.29   43.58
   2   7   5 1811.73   46.17
   4  -1   3 2716.31   69.24
   4   1   3 2886.54   52.73
   2   5   7   24.84    6.58
   2  -5   7   23.05    5.83
   4   4  -3   13.31    4.72
   4  -4  -3    9.89    3.20
   1   5  -9  270.76   15.75
   1  -5  -9  251.62   22.08
   3   3   6 7778.91  153.39
   3  -3   6 7724.30  101.99
   0   5   9  255.76   20.68
   0  -5   9  305.62   25.78
   3  -3  -8   57.69    8.48
   3   3  -8   48.13   10.60
   0  10   0 1609.14   58.00
   0 -10   0 1610.25   67.04
   4   3   2 5657.40   67.67
   4  -3   2 5576.50   93.32
   1  -3 -10  200.65   21.29
   1   3 -10  194.23   22.78
   2  -4  -9 2169.50   45.23
   2   4  -9 2194.19   47.06
   2   0 -10  212.38   14.68
   0 -10   1   46.21    8.41
   0  10   1   75.26   10.78
   4   0  -6 3427.85   63.47
   2   9  -1  115.48   13.97
   2  -9  -1  114.22   16.61
   0  -3  10   29.39    7.09
   0   3  10   29.66    7.11
   1  -4   9  519.62   30.61
   1   4   9  555.07   19.90
   2   9   0   52.21    7.30
   2  -9   0   52.72    7.57
   2   8  -5   29.96    7.80
   2  -8  -5   23.05    6.96
   4   4   1 1275.87   33.58
   4  -4   1 1250.35   34.92
   2  -1 -10 1077.38   33.01
   2   1 -10 1132.08   35.66
   4  -2   311256.79  169.59
   4   2   311453.05  120.34
   4   1  -6   23.58    9.65
   4  -1  -6   27.46    4.72
   4  -3  -5  293.89   12.57
   4   3  -5  282.59   22.17
   3  -7   2 1517.55   34.64
   3   7   2 1528.47   41.79
   2   9  -2 2725.98   47.11
   2  -9  -2 2697.29   54.30
   3   7  -4  585.77   15.13
   3  -7  -4  552.30   15.58
   1  -9   4 1822.19   44.31
   1   9   4 1863.88   43.84
   4  -4  -4  757.60   17.81
   4   4  -4  757.16   26.29
   3  -5   5    2.86   10.31
   3   5   5   18.77    3.94
   1   0  10    4.34    5.82
   0  10   2  554.74   17.63
   0 -10   2  519.00   17.07
   1  -7   7  164.79   12.76
   1   7   7  153.71   13.73
   2   9   1   16.35    5.65
   2  -9   1    8.82    4.03
   3   5  -7   41.53    8.09
   3  -5  -7   34.89    6.89
   0  -9   5   39.76    8.12
   0   9   5   39.99   10.29
   2   8   4 1592.11   45.34
   2  -8   4 1639.27   41.47
   3   0   7   79.33    9.87
   3   6   4  584.89   15.62
   3  -6   4  534.97   16.81
   1  -1  10  235.60   17.09
   1   1  10  219.68   25.39
   3  -6  -6  435.02   23.91
   3   6  -6  397.87   24.16
   3   0  -9  346.43   21.96
   2  -2 -10  273.58   17.50
   2   2 -10  266.73   24.79
   1 -10   0 1209.86   40.34
   1  10   0 1213.78   36.41
   4  -2  -6 1847.17   43.48
   4   2  -6 1870.60   45.84
   1   6   8  462.10   18.72
   1  -6   8  425.02   45.45
   1 -10  -1  323.94   23.49
   1  10  -1  307.04   15.11
   3  -1   7 3941.57   65.66
   3   1   7 3961.82   53.95
   2   4   8    7.16    3.51
   2  -4   8   10.21    5.11
   3  -1  -9  321.00   22.66
   3   1  -9  339.86   30.87
   4   5  -1 2789.44   51.81
   4  -5  -1 2783.96   51.99
   2  -6  -8  615.93   20.10
   2   6  -8  587.99   17.67
   1   8   6 1106.89   49.42
   1  -8   6 1102.71   28.99
   1   9  -5 3852.46   76.86
   1  -9  -5 3843.65   82.38
   2   9  -3 1588.74   37.38
   2  -9  -3 1625.87   45.77
   4  -5  -2 4971.87   69.51
   4   5  -2 5006.20   79.82
   2  -7  -7   60.50   13.05
   2   7  -7   70.95   14.60
   2   0   9    6.30    3.86
   3   4   6 1399.45   39.98
   3  -4   6 1466.24   40.57
   1  10   1  174.76   17.05
   1 -10   1  130.95   14.22
   3   4  -8   32.98    6.45
   3  -4  -8   21.68    7.09
   4   0   4  292.06   17.50
   4  -4   2 4177.07   48.84
   4   4   2 4313.74   93.56
   4  -3   3   54.66    9.70
   4   3   3   51.83    8.14
   2  -1   9 1754.87   42.02
   2   1   9 1838.58   43.76
   4   5   0   39.26    6.35
   4  -5   0   31.66    6.87
   1  -4 -10   23.92    9.20
   1   4 -10    1.31    6.81
   1 -10  -2  349.29   22.15
   1  10  -2  380.68   23.69
   1  -2  10 1485.67   42.36
   1   2  10 1535.59   40.40
   2  -9   2 1646.06   37.70
   2   9   2 1647.11   39.47
   4   1   4 2232.74   48.29
   4  -1   4 2208.85   52.89
   0  -7   8  517.89   21.38
   0   7   8  489.35   23.06
   0 -10   3 1761.37   41.37
   0  10   3 1754.09   41.82
   0  -4  10    7.22    8.96
   0   4  10   18.02    4.02
   1  -7  -8 2307.82   49.71
   1   7  -8 2330.64   43.58
   3   2   7 1079.06   44.15
   3  -2   7 1052.26   34.41
   4   5  -3   14.60    4.94
   4  -5  -3    9.81    6.49
   3  -2  -9 3354.61   59.35
   3   2  -9 3401.86   62.30
   3  -7   3    1.78    3.59
   3   7   3   11.39    5.16
   0  -8   7  588.60   24.05
   0   8   7  526.50   29.73
   3  -7  -5 2186.73   51.69
   3   7  -5 2140.24   50.63
   4   4  -5  828.37   36.37
   4  -4  -5  917.02   28.08
   3  -8  -1 1255.01   40.19
   3   8  -1 1205.85   59.45
   2   5  -9 1617.47   38.96
   2  -5  -9 1655.72   46.30
   2   3 -10   18.93    7.08
   2  -3 -10   18.64    6.49
   1 -10   2  164.94   14.95
   1  10   2  169.21   14.72
   4   3  -6   27.28   11.30
   4  -3  -6    9.79    4.62
   1  -8  -7  514.26   21.18
   1   8  -7  504.50   21.88
   2   7   6    4.03    7.67
   2  -7   6   23.40    5.50
   1   0 -11  282.20   21.71
   3  -8   0   26.92    8.79
   3   8   0    8.06    6.18
   2  -6   7  261.80   20.25
   2   6   7  253.76   21.45
   3  -8  -216664.68  283.58
   3   8  -216772.16  244.67
   2   2   9   27.85    8.28
   2  -2   9   10.47    2.81
   1  -5   9 5040.13   78.23
   1   5   9 5050.06   70.80
   1  -6  -9 1246.66   40.75
   1   6  -9 1238.42   37.81
   2  -8  -6  599.18   20.42
   2   8  -6  628.21   22.86
   4   0  -7    5.54    4.71
   4   5   1  247.53   15.94
   4  -5   1  270.60   17.10
   0  -6   9  268.16   19.01
   0   6   9  237.51   15.37
   4  -2   4   27.21    5.61
   4   2   4   26.98    6.99
   1   1 -11 2622.71   68.47
   1  -1 -11 2679.67   53.27
   2  -9  -4   82.01   13.55
   2   9  -4   42.36   10.30
   1 -10  -3 1027.29   37.93
   1  10  -3 1048.28   35.45
   4  -1  -7 1069.19   31.06
   4   1  -7 1037.02   33.46
   0   0  11    9.99    5.41
   1   9   5   85.08   20.94
   1  -9   5   95.90   12.56
   4   5  -4 2621.48   57.97
   4  -5  -4 2563.32   61.37
   1  -3  10  635.70   22.73
   1   3  10  660.79   32.18
   0   1  11  180.60   16.16
   0  -1  11  152.74   16.36
   3  -8   1 2928.34   68.27
   3   8   1 2942.80   60.80
   3   8  -3 2683.56   55.98
   3  -8  -3 2703.41   53.74
   3   3   7 1640.54   43.55
   3  -3   7 1592.21   34.67
   2  -9   3  574.68   22.28
   2   9   3  572.17   27.47
   2   8   5  914.95   45.80
   2  -8   5  965.60   39.76
   3   3  -9 1366.85   42.34
   3  -3  -9 1368.03   49.13
   4   4   3   91.67   11.07
   4  -4   3   66.94   13.27
   0   9   6   33.38    9.47
   0  -9   6   41.42    8.46
   1   2 -11  939.43   33.96
   1  -2 -11  947.18   31.70
   2  -5   8 2997.64   61.61
   2   5   8 3053.76   59.97
   3   6   5  475.15   21.03
   3  -6   5  483.83   19.30
   4   2  -7 1010.39   44.18
   4  -2  -7  941.27   33.01
   0  10   4  821.44   21.19
   0 -10   4  814.86   21.06
   3   6  -7  371.35   35.90
   3  -6  -7  360.55   33.23
   1  10   3   79.50   11.70
   1 -10   3   84.56   11.64
   2   3   9    2.20    7.16
   2  -3   9    1.29    1.91
   3   5   6  876.31   30.46
   3  -5   6  940.45   29.13
   1  -9  -6 2521.76   72.11
   1   9  -6 2565.14   55.26
   0   2  11 3406.94   76.98
   0  -2  11 3330.44   71.60
   3  -5  -8  274.09   15.15
   3   5  -8  258.96   23.02
   4  -3   4  702.58   26.29
   4   3   4  653.06   25.48
   4  -5   2   45.56    8.88
   4   5   2   40.41    7.22
   1   5 -10  162.66   12.50
   1  -5 -10  197.95   14.39
   2   4 -10  417.78   23.59
   2  -4 -10  397.34   24.07
   4   6  -1 1959.13   54.73
   4  -6  -1 1979.64   55.17
   4  -4  -6  605.56   20.93
   4   4  -6  713.86   28.17
   4   6  -2  511.21   21.37
   4  -6  -2  530.57   16.07
   0   5  10   47.16    6.46
   0  -5  10   37.79   19.54
   3   7   4   51.44    7.59
   3  -7   4   43.80    8.28
   1  10  -4  742.92   23.79
   1 -10  -4  781.09   35.74
   3  -7  -6  494.87   28.81
   3   7  -6  458.06   21.53
   3   8   2  365.79   25.48
   3  -8   2  383.49   31.98
   4   0   5    4.48    5.30
   3  -8  -4  653.39   31.31
   3   8  -4  646.78   35.97
   1   7   8    4.49    7.33
   1  -7   8    4.29    4.20
   4   5  -5  187.61   23.69
   4  -5  -5  208.22   18.01
   4  -6   0  442.77   14.62
   4   6   0  396.58   16.98
   2   9  -5 1955.87   51.42
   2  -9  -5 2043.78   54.52
   1  -8   7  254.57   15.57
   1   8   7  272.28   23.74
   4  -1   5  551.35   19.98
   4   1   5  597.44   21.39
   2   7  -8   41.46    9.15
   2  -7  -8   42.43    7.66
   2   0 -11   -2.61    6.82
   1   3 -11   15.55    5.38
   1  -3 -11    8.65    4.73
   4   6  -3 3794.28   70.22
   4  -6  -3 3755.88   82.04
   1  -4  10  191.02   18.40
   1   4  10  170.03   22.13
   4   3  -7  296.54   24.53
   4  -3  -7  254.75   21.53
   2  -1 -11  119.55   16.61
   2   1 -11   74.06   16.32
   3   0   8    9.63    4.42
   2  10  -1  898.57   34.41
   2 -10  -1  957.12   34.05
   3  -4   7  617.99   17.05
   3   4   7  688.81   21.86
   2  -6  -9  233.99   18.71
   2   6  -9  269.24   20.69
   3   0 -10    2.12    6.68
   2  10   0   77.56   11.73
   2 -10   0  118.09   13.87
   3   4  -9 1837.47   52.49
   3  -4  -9 1845.89   46.62
   0   3  11    3.55    4.89
   0  -3  11   24.76    9.66
   0  11   0   -4.90   12.64
   0 -11   0   35.86   10.60
   3  -1   8   13.22    5.11
   3   1   8   23.03    5.82
   2   9   4  106.17   14.16
   2  -9   4  128.61   20.61
   2   8  -7  540.39   20.80
   2  -8  -7  547.27   33.65
   1  -6   9 6028.04  141.28
   1   6   9 5886.89   79.05
   3  -1 -10 1191.74   37.38
   3   1 -10 1126.83   39.61
   4   2   5  624.92   20.58
   4  -2   5  617.59   18.70
   4   6   1   69.99   12.80
   4  -6   1   74.41   10.65
   2  10  -2 1496.37   44.14
   2 -10  -2 1587.08   45.54
   0  11   1   23.66    7.52
   0 -11   1   20.99    9.35
   4   0  -8  509.13   28.88
   1 -10   4  454.41   21.30
   1  10   4  407.33   21.84
   2  -4   9    9.39    3.59
   2   4   9    7.65    5.00
   2  10   1 1121.82   43.19
   2 -10   1 1132.84   38.36
   4  -4   4  632.04   21.25
   4   4   4  671.98   20.13
   1   9   6  545.74   30.63
   1  -9   6  611.96   20.58
   2  -2 -11  511.80   31.63
   2   2 -11  513.44   21.77
   0 -10   5 2876.65   77.60
   0  10   5 2860.96   60.22
   4   5   3 3407.79   71.00
   4  -5   3 3339.74   55.88
   0   8   8  927.28   34.52
   0  -8   8  896.14   32.22
   4  -1  -8   29.98    9.58
   4   1  -8   15.87    5.82
   2  -7   7  747.20   24.66
   2   7   7  733.69   26.54
   1   8  -8  357.58   29.83
   1  -8  -8  330.75   25.60
   4   6  -4  191.49   14.04
   4  -6  -4  189.09   17.30
   1   7  -9 1742.31   46.18
   1  -7  -9 1733.33   48.19
   1   0  11  139.95   13.02
   0  -7   9   26.79    9.22
   0   7   9   50.62    8.54
   3  -2   8   23.22    5.95
   3   2   8   32.74    8.15
   3   8   312317.22  157.20
   3  -8   312180.70  215.69
   3   8  -5  252.85   25.97
   3  -8  -5  247.44   19.52
   3  -2 -10  589.65   21.36
   3   2 -10  582.58   22.09
   0 -11   2   19.91    8.68
   0  11   2   18.17    7.56
   1   1  11   24.52    5.89
   1  -1  11   17.11    5.07
   2  -8   6  252.02   31.43
   2   8   6  237.90   31.41
   1  10  -5  142.84   14.63
   1 -10  -5  133.72   17.01
   2   0  10 3764.25   67.51
   2  10  -3  385.54   25.90
   2 -10  -3  415.60   24.65
   2  -6   8 2563.23   57.83
   2   6   8 2501.47   69.43
   2   5 -10  615.39   21.77
   2  -5 -10  581.27   24.64
   1  11   0  214.95   19.49
   1 -11   0  204.88   16.92
   4  -5  -6 1067.52   36.01
   4   5  -6 1113.45   49.24
   4   2  -8   99.22   13.40
   4  -2  -8   94.69   13.41
   2  -1  10 1233.99   38.29
   2   1  10 1301.05   45.38
   0  -9   7  455.65   36.81
   0   9   7  418.03   29.73
   1  -4 -11  805.94   32.30
   1   4 -11  800.39   34.80
   1 -11  -1   67.80   11.12
   1  11  -1   78.01   14.19
   3   9  -1 5289.85  136.62
   3  -9  -1 5353.67   84.63
   5   0  -2    0.57    3.81
   3   6   6 3389.75  103.05
   3  -6   6 3387.75   72.25
   4  -4  -7 4749.12  108.24
   4   4  -7 4595.45  109.40
   2  10   2   77.05   10.94
   2 -10   2   55.48    9.88
   4   3   5   22.75    5.37
   4  -3   5   13.12    7.15
   5   0  -1    7.92    4.83
   3  -6  -8 2474.69   74.05
   3   6  -8 2592.15   59.16
   4   6   2 1253.44   58.85
   4  -6   2 1285.63   39.25
   1  -9  -711697.19  166.71
   1   9  -711682.76  140.67
   3  -9   0   47.43   19.99
   3   9   0   51.88   13.02
   3   9  -2   43.22    9.41
   3  -9  -2   25.80   13.62
   5  -1  -2   77.73   10.10
   5   1  -2   58.80    5.67
   1  -6 -10 5122.98   66.24
   1   6 -10 5326.18  102.77
   2   9  -6   73.42   13.83
   2  -9  -6  128.16   15.71
   3   7   5 1425.05   46.56
   3  -7   5 1468.72   58.89
   1  11   1 1813.46   53.94
   1 -11   1 1702.68   46.38
   1   2  11   26.09   10.09
   1  -2  11    7.55   13.71
   5  -1  -1 1615.22   38.35
   5   1  -1 1602.93   43.30
   0   4  11  435.21   17.10
   0  -4  11  453.94   36.19
   3   7  -7  880.44   30.76
   3  -7  -7  913.23   37.09
   5   0  -3    9.52    2.68
   2  -3 -11 2729.25   60.13
   2   3 -11 2694.41   54.06
   0  -6  10    6.87   10.36
   0   6  10    6.82    3.85
   1 -11  -2  254.76   20.24
   1  11  -2  215.06   18.09
   1   5  10 5322.23   97.86
   1  -5  10 5339.34  112.60
   5   0   0    5.44    4.04
   5   1  -3 9689.76  139.51
   5  -1  -3 9507.77  201.47
   3   3   8 3795.20   71.84
   3  -3   8 3604.39   86.21
   2  -2  10 1596.66   42.51
   2   2  10 1652.64   49.96
   0 -11   3   35.17   10.14
   0  11   3   34.29   11.67
   4   6  -5 5176.76  125.16
   4  -6  -5 5164.38   70.18
   3   5   7   56.22    6.46
   3  -5   7   57.48   11.31
   3  -3 -10 2759.00   54.37
   3   3 -10 2744.06   63.53
   3   5  -9 1537.44   45.74
   3  -5  -9 1480.12   39.05
   5  -1   0  550.40   22.10
   5   1   0  529.83   29.40
   4  -7  -1 3009.19  113.39
   4   7  -1 2938.81   64.94
   3  -9   1  139.26   16.67
   3   9   1  127.99   20.14
   3   9  -3   25.32    4.33
   3  -9  -3   23.70   15.06
   4   7  -2 3736.84   87.84
   4  -7  -2 3760.77  121.51
   4   0   6  988.71   41.18
   5   2  -2   73.71   12.39
   5  -2  -2   83.59   12.38
   2 -10  -4 1036.37   40.63
   2  10  -4 1067.31   39.12
   5   2  -1   48.97   11.18
   5  -2  -1   47.74    9.31
   2   9   5 2688.43   70.28
   2  -9   5 2730.14   61.91
   1   0 -12   18.80    7.06
   1 -11   2 1019.94   37.31
   1  11   2 1046.26   35.97
   4   3  -8 7915.13  163.07
   4  -3  -8 7788.76  106.46
   1  10   5 3842.47   69.09
   1 -10   5 3851.83   69.87
   4   1   6 5168.41   70.04
   4  -1   6 5264.26   63.51
   2   5   9  302.12   16.35
   2  -5   9  315.66   15.61
   4  -7   0   23.87    8.77
   4   7   0   21.06    5.81
   5   0  -4   16.31    4.42
   1  -1 -12  206.88   22.40
   1   1 -12  223.67   21.35
   4   5   4  282.81   21.05
   4  -5   4  321.00   21.34
   5   2  -3  907.09   33.90
   5  -2  -3  898.21   35.63
   3   8   4   15.59    4.32
   3  -8   4   26.25    9.38
   4  -7  -3 4262.21   93.15
   4   7  -3 4202.65   58.80
   5  -1  -4  152.66   15.86
   5   1  -4  144.64   18.01
   2 -10   3   44.48    8.26
   2  10   3   53.69    9.69
   1 -11  -3 2522.04   49.45
   1  11  -3 2472.08   63.25
   1  -3  11 2877.65   71.43
   1   3  11 2933.94   84.16
   3  -8  -6 1772.69   57.76
   3   8  -6 1702.00   47.07
   5   0   1 3113.86   57.38
   5  -2   0 5397.41   88.48
   5   2   0 5406.37   88.54
   0   0  12  299.53   24.80
   1  -8   8 1212.33   36.47
   1   8   8 1227.06   46.08
   0  10   6 1985.96   61.84
   0 -10   6 2053.26   69.92
   2  -7  -9 9230.19  160.94
   2   7  -9 9227.22  121.65
   4  -4   5  230.82   16.29
   4   4   5  189.18   14.57
   5   1   1  522.14   17.56
   5  -1   1  524.85   26.84
   2   8  -8   22.14    8.27
   2  -8  -8   19.79    5.82
   4   6   3 4420.34   83.36
   4  -6   3 4293.43   74.07
   0   1  12 3366.42   71.29
   0  -1  12 3376.58   74.51
   2   3  10   18.85    7.46
   2  -3  10   -2.15   11.71
   4   2   6 1346.77   40.21
   4  -2   6 1306.71   42.99
   1  -7   9 1614.23   49.81
   1   7   9 1542.50   45.02
   3  -9   2  672.01   23.89
   3   9   2  695.04   59.25
   1  10  -6  861.54   40.55
   1 -10  -6  750.56   28.56
   4  -7   1 3147.58   73.83
   4   7   1 3146.17   67.02
   3  -9  -4    6.57   11.62
   3   9  -4   18.84    5.92
   1  -2 -12  350.75   21.69
   1   2 -12  396.58   21.22
   2  -4 -11   17.37    7.76
   2   4 -11   10.47    8.19
   1   5 -11  468.59   31.33
   1  -5 -11  492.79   25.10
   4   0  -9   13.71    7.27
   5  -3  -2 2142.55   53.49
   5   3  -2 2168.14   57.62
   5   2  -4   72.68   16.14
   5  -2  -4   76.24   12.77
   1   9   7  151.03   34.32
   1  -9   7  146.52   13.48
   4   5  -7  355.42   20.54
   4  -5  -7  328.20   18.57
   5  -3  -1 5239.65  132.43
   5   3  -1 5194.62   97.02
   0 -11   4   31.81    8.96
   0  11   4   23.62    9.76
   3   4   8  273.38   18.45
   3  -4   8  271.10   18.49
   1  11   3  214.63   20.41
   1 -11   3  187.54   16.94
   4  -1  -9   19.75    6.55
   4   1  -9   21.18    7.43
   4   7  -4 1127.82   37.27
   4  -7  -4 1058.22   38.40
   3   4 -10  524.49   23.17
   3  -4 -10  499.44   35.73
   5   0  -5 6299.85   96.35
   0   5  11 4557.88   89.51
   0  -5  11 4470.77   78.56
   5  -2   1   19.66    3.76
   5   2   1   25.62    7.28
   2  -6 -10 1820.87   72.97
   2   6 -10 1827.96   48.94
   5   3  -3 2196.19   73.05
   5  -3  -3 2215.42   55.65
   0   2  12  130.57   13.85
   0  -2  12  125.03   16.81
   4   6  -6  507.96   27.37
   4  -6  -6  521.50   34.17
   2  10  -5  476.39   27.75
   2 -10  -5  443.65   30.80
   3   0   9   16.17    6.36
   5   1  -5 3263.25   74.10
   5  -1  -5 3298.13  114.90
   5   3   0  639.58   48.36
   5  -3   0  579.07   19.88
   3   0 -11   63.29   11.62
   4   4  -8 6669.60  116.69
   4  -4  -8 6512.21   98.06
   2  -9  -7 3109.34   69.67
   2   9  -7 3148.31   65.23
   2   8   7   93.57   15.49
   2  -8   7   88.72   16.11
   1  11  -4 1018.65   35.88
   1 -11  -4 1027.00   38.93
   2  -7   8 2637.53   72.72
   2   7   8 2572.31   68.05
   1  -8  -9 3522.59   90.91
   1   8  -9 3519.71   74.42
   5   0   2    8.16    5.29
   3  -1   9 1119.60   34.90
   3   1   9 1156.39   37.33
   0  -8   9 4336.20  102.28
   0   8   9 4607.13   74.12
   2   0 -12 2117.40   57.64
   3   1 -11  126.96   16.15
   3  -1 -11  161.76   15.22
   4  -3   6 1259.37   40.38
   4   3   6 1256.84   49.59
   4   2  -9 1254.33   70.33
   4  -2  -9 1286.61   46.96
   3   7   6 1666.94   62.53
   3  -7   6 1656.56   56.53
   5   1   2 3958.87   61.44
   5  -1   2 3928.65   59.27
   1   6  10   94.37   12.68
   1  -6  10   64.53   18.43
   1  -4  11  273.75   33.39
   1   4  11  258.62   20.43
   3   7  -8 2554.34   58.99
   3  -7  -8 2475.66   54.69
   1  -3 -12 1491.49   46.19
   1   3 -12 1486.11   45.93
   4   7   2 2858.93   65.65
   4  -7   2 2817.07   61.07
   2   1 -12  245.06   35.55
   2  -1 -12  272.15   23.40
   0   9   8 2120.71   59.17
   0  -9   8 1971.49   53.22
   2  10   4 1118.26   39.99
   2 -10   4 1096.01   36.27
   1   9  -8  634.39   35.92
   1  -9  -8  637.74   24.56
   3   6   7 2788.85   92.07
   3  -6   7 2816.10   70.99
   1   7 -10   13.92    9.16
   1  -7 -10   21.08   13.31
   5   3  -4  314.47   18.11
   5  -3  -4  321.82   26.45
   5   2  -5  397.20   18.00
   5  -2  -5  431.26   40.36
   3   6  -9 1151.33   43.32
   3  -6  -9 1141.28   37.65
   3  -9   3 1079.87   34.06
   3   9   3 1101.39   41.05
   2  -4  10 1144.95   42.19
   2   4  10 1188.36   41.13
   2  11  -1 3864.91   67.02
   2 -11  -1 3919.29  114.51
   3  -9  -5 5135.21   86.52
   3   9  -5 4954.48   84.76
   0  -7  10   32.77   10.24
   0   7  10   14.99    5.12
   2 -11   0   85.33   17.06
   2  11   0  118.42   16.08
   3  -2   9   95.05   11.08
   3   2   9   79.26   12.93
   5   3   113261.38  214.48
   5  -3   112975.29  239.94
   1 -10   6  114.65   17.22
   1  10   6   80.99   18.32
   0  -3  12  564.49   24.44
   0   3  12  583.07   30.54
   3   2 -11  171.91   26.54
   3  -2 -11  192.33   28.26
   2   9   6 1604.91   72.61
   2  -9   6 1515.31   49.02
   4  -7  -5  517.30   20.20
   4   7  -5  493.12   17.02
   2   6   9 2200.16   76.59
   2  -6   9 2153.89   81.31
   5  -4  -2   51.45    7.86
   5   4  -2   49.86   11.26
   3   8   5  490.17   22.32
   3  -8   5  526.17   28.28
   5   2   2   30.64    6.06
   5  -2   2   22.29    5.12
   4  -5   5  176.94   15.36
   4   5   5  197.43   14.79
   5  -4  -1  569.80   15.60
   5   4  -1  624.40   14.32
   2 -11  -2 1641.79   57.52
   2  11  -2 1587.92   53.12
   3   8  -7 1750.17   56.28
   3  -8  -7 1686.14   54.05
   4  -6   4   31.05    6.87
   4   6   4   46.00   11.26
   2  -2 -12   34.39    8.64
   2   2 -12   44.20   12.28
   1  11   4  652.92   39.68
   1 -11   4  629.36   21.55
   2  11   1   11.20    5.46
   2 -11   1   14.91    6.09
   5   0  -6    1.06    4.74
   0  12   0 2028.94   82.56
   0 -12   0 1994.24   74.71
   5   4  -3  585.80   23.49
   5  -4  -3  581.58   20.59
   2  -5 -11 2069.81   65.40
   2   5 -11 2109.94   50.02
   0  11   5  494.89   22.91
   0 -11   5  451.46   29.37
   4  -3  -9   49.44   12.05
   4   3  -9   46.79   10.93
   4   0   7   18.03    4.44
   5   4   0 1886.39   51.83
   5  -4   0 1842.88   52.89
   5  -1  -6 1688.23   54.90
   5   1  -6 1628.32   44.33
   0  12   1   11.48    8.10
   0 -12   1   20.18    8.82
   4  -8  -1   39.30   10.46
   4   8  -1   39.26    9.83
   3  -5   8  152.54   22.47
   3   5   8  184.63   11.92
   0 -10   7  866.69   27.51
   0  10   7  906.58   36.17
   4  -8  -2 5740.03  124.64
   4   8  -2 5655.68  133.01
   3  10  -1   23.58    4.88
   3 -10  -1   89.42   18.47
   1   0  12    2.84    3.84
   3  -5 -10  642.16   24.89
   3   5 -10  629.45   26.85
   5   3  -5 1350.57   54.50
   5  -3  -5 1275.81   54.34
   4   1   7  230.26   19.93
   4  -1   7  199.27   17.47
   2   0  11   -1.53    3.68
   1  10  -7 3575.56  142.62
   1 -10  -7 3548.83   75.76
   1  11  -5  446.47   30.82
   1 -11  -5  421.34   26.96
   2 -11  -3  574.97   28.91
   2  11  -3  559.41   20.33
   1  -6 -11   76.51   35.54
   1   6 -11   80.54   10.64
   5   0   3 1070.89   31.51
   4  -4   6 7458.79   85.34
   4   4   6 7479.35  112.33
   3  10   0  636.71   33.69
   3 -10   0  682.18   30.64
   3 -10  -2 9970.48  167.54
   3  10  -2 9980.33  121.33
   4  -8   0   35.10   14.22
   4   8   0   67.76   11.53
   1  -1  12  933.29   55.38
   1   1  12 1012.37   37.23
   2  10  -6  838.11   31.01
   2 -10  -6  797.80   29.13
   3  -3   9  931.09   38.55
   3   3   9  953.62   44.75
   4  -6  -7 2279.01   60.63
   4   6  -7 2277.07   56.33
   2  -1  11  415.51   15.93
   2   1  11  439.73   26.53
   1   4 -12  544.69   21.36
   1  -4 -12  582.71   34.05
   4   7   3  544.07   21.97
   4  -7   3  496.50   17.33
   3   3 -11  450.49   24.49
   3  -3 -11  389.97   28.29
   4   5  -8 1276.47   81.44
   4  -5  -8 1233.77   39.03
   5   1   3  589.06   20.91
   5  -1   3  607.37   23.22
   4  -8  -3 1161.58   56.95
   4   8  -3 1153.28   39.12
   5  -4  -4   16.76    7.63
   5   4  -4   16.68    7.92
   5  -3   2  468.22   32.69
   5   3   2  470.26   21.99
   0 -12   2   74.90   13.32
   0  12   2   88.43   13.35
   2 -11   2  141.00   17.52
   2  11   2  135.30   16.42
   0   6  11  314.79   21.04
   0  -6  11  369.14   32.26
   5  -2  -6 1640.09   51.81
   5   2  -6 1678.14   59.79
   2  -3 -12 4497.50   76.99
   2   3 -12 4413.34   71.11
   2  -8  -9  392.18   31.04
   2   8  -9  323.13   32.99
   1  -5  11  -13.12   11.07
   1   5  11   26.01   10.83
   4   2   7  721.08   26.85
   4  -2   7  686.45   19.14
   5   4   1  338.32   25.54
   5  -4   1  304.28   17.91
   0   4  12  205.45   15.81
   0  -4  12  152.53   30.53
   3 -10   1 6434.66  137.75
   3  10   1 6260.81  152.85
   1  12   0  196.62   18.81
   1 -12   0  204.83   29.24
   3 -10  -3  304.66   24.88
   3  10  -3  252.50   15.16
   1 -12  -1  506.44   26.90
   1  12  -1  489.23   19.82
   3   9   4  729.35   20.83
   3  -9   4  708.73   17.49
   1  -8   9  781.19   19.54
   1   8   9  740.73   27.17
   1  -2  12 1215.88   59.51
   1   2  12 1345.03   46.67
   3   9  -6 1981.23   67.91
   3  -9  -6 2152.10   70.06
   2  10   5  435.41   30.55
   2 -10   5  435.10   20.79
   4  -8   1   20.55    6.85
   4   8   1   19.69    9.21
   2  -2  11   44.19    5.94
   2   2  11   67.58   11.80
   2  -7 -10 2346.09   56.05
   2   7 -10 2343.31   58.27
   4  -7  -6   45.32    8.05
   4   7  -6   54.98    9.96
   1   9   8   48.65   16.44
   1  -9   8   24.71    6.54
   2   5  10  739.52   38.56
   2  -5  10  739.36   31.87
   5  -2   3  218.28   17.39
   5   2   3  240.28   17.02
   4   0 -10  300.53   31.72
   1  12   1   41.82   19.50
   1 -12   1   44.67    9.62
   2   9  -8  126.92   19.61
   2  -9  -8  160.89   27.77
   4  -4  -9 2467.86   60.94
   4   4  -9 2477.40   79.79
   5  -5  -2   93.74   11.48
   5   5  -2  103.54   16.39
   2  11  -4  329.71   18.00
   2 -11  -4  352.84   34.76
   4  -8  -4  334.40   26.35
   4   8  -4  302.50   18.10
   4  -1 -10 3133.83   73.41
   4   1 -10 3219.82   81.37
   1 -12  -2   71.54   18.30
   1  12  -2   61.17   11.37
   5  -5  -1 7213.93  119.48
   5   5  -1 7321.59  173.10
   1  11   5  663.04   31.43
   1 -11   5  576.13   19.10
   0 -12   3  166.87   17.12
   0  12   3  195.93   16.72
   1  -7  10  498.93   19.67
   1   7  10  490.53   39.07
   5  -4  -5 2037.54   64.41
   5   4  -5 2167.50   90.87
   5   0  -7 4669.26   66.26
   5   3  -6   95.99   17.31
   5  -3  -6   64.61   16.61
   5   5  -3  881.22   34.39
   5  -5  -3  906.47   34.31
   1   0 -13  497.00   26.11
   3   7   7 1368.18   53.12
   3  -7   7 1352.08   56.33
   2   8   8   45.63   11.89
   2  -8   8   52.34   11.07
   2  11   3   52.19   13.02
   2 -11   3   47.28   10.39
   3  -4   9  231.14   18.72
   3   4   9  271.21   19.41
   3  10   2  788.36   24.52
   3 -10   2  807.95   20.46
   4  -6   5   20.34    7.39
   4   6   5   40.10    6.81
   4   3   7    7.13    5.43
   4  -3   7    8.91    6.69
   3   7  -9 1231.35   51.18
   3  -7  -9 1150.65   41.27
   3 -10  -4   13.40   14.67
   3  10  -4   12.25    3.55
   5   5   0  144.85   16.21
   5  -5   0  141.54   13.25
   5  -1  -7  330.86   26.71
   5   1  -7  361.94   18.91
   1  12   2   12.29    8.94
   1 -12   2   19.58    8.58
   3  -4 -11  213.04   27.63
   3   4 -11  234.32   20.91
   0 -11   6  443.08   23.45
   0  11   6  451.77   39.63
   1   1 -13 6914.07  149.56
   1  -1 -13 6807.80  123.02
   1   3  12  391.98   31.95
   1  -3  12  365.47   77.21
   4  -2 -10 2370.34   73.58
   4   2 -10 2547.24   74.50
   3  -8   6  761.33   42.30
   3   8   6  787.14   40.50
   5   4   2   51.77   14.27
   5  -4   2   23.13    6.46
   1 -10   7 7260.40  111.85
   1  10   7 7496.03  155.37
   2   3  11  423.36   22.79
   2  -3  11  459.03   28.77
   3  -8  -8 3107.54   63.33
   3   8  -8 2833.76   81.27
   4   8   2  133.05   25.93
   4  -8   2  142.57   20.92
   2  -6 -11   68.63   14.25
   2   6 -11   54.37   13.23
   2  -4 -12 1906.26   41.56
   2   4 -12 1935.41   82.28
   5  -3   3 7455.21  121.46
   5   3   3 7591.96  114.95
   4   5   6 1130.39   63.65
   4  -5   6 1150.84   38.09
   2   9   7  673.48   29.50
   2  -9   7  678.38   12.98
   2  -7   9   38.89   16.13
   2   7   9   16.10    7.04
   1  -8 -10 3932.06  145.79
   1   8 -10 3920.38   70.25
   1   9  -9 3095.92   75.53
   1  -9  -9 3051.36   46.44
   1  12  -3  777.23   24.17
   1 -12  -3  871.97   34.51
   1 -11  -6 1058.60   38.89
   1  11  -6 1103.03   46.29
   5   0   4   17.18    8.06
   0   9   9  496.58   42.05
   0  -9   9  568.42   20.34
   1   5 -12 3646.61   66.73
   1  -5 -12 3906.13   85.61
   4   7   4 4192.41   90.34
   4  -7   4 3997.49   63.91
   3  -6   8 1067.23   37.76
   3   6   8 1115.12   49.79
   0   0  13    1.12    8.44
   0   8  10  820.11   41.47
   0  -8  10  868.55   29.95
   5   5  -4   31.53    7.88
   5  -5  -4   27.00   12.74
   3   6 -10 1142.68   39.92
   3  -6 -10 1120.24   50.01
   5   1   4 1842.88   48.47
   5  -1   4 1830.49   29.32
   5  -2  -7  670.80   15.70
   5   2  -7  655.99   50.72
   3   0  10    5.88    4.41
   0   1  13   12.29    4.37
   0  -1  13    4.13    7.34
   2 -10  -7  337.52   34.60
   2  10  -7  348.11   34.34
   4   8  -5  898.86   31.09
   4  -8  -5  835.36   32.01
   1   2 -13   27.41    7.24
   1  -2 -13    6.38   11.79
   3   0 -12    8.06   10.02
   5   5   1 1653.85   51.15
   5  -5   1 1670.49   54.19
   3   1  10  315.29   24.35
   3  -1  10  298.88   20.18
   0  -5  12  895.20   39.04
   0   5  12  845.50   21.33
   4   6  -8 1789.23   65.16
   4  -6  -8 1670.69   48.62
   3  -1 -12 1173.60   47.85
   3   1 -12 1238.59   47.16
   2 -11  -5 2106.47   74.05
   2  11  -5 2105.87   57.96
   0 -12   4   14.34    5.40
   0  12   4   24.95   14.27
   0 -10   8 3171.02   48.42
   0  10   8 3205.35   63.21
   1  12   3  140.26   37.97
   1 -12   3  107.80   19.69
   1  -7 -11  598.45   29.97
   1   7 -11  542.65   25.25
   1  10  -8  344.80   38.77
   1 -10  -8  350.66   45.04
   4   3 -10 1763.57   61.21
   4  -3 -10 1708.23   53.67
   3  -9   5   24.49   10.35
   3   9   5   16.78    6.13
   1   6  11  114.89   15.50
   1  -6  11   96.40   31.00
   4  -7  -7  858.62   41.20
   4   7  -7  856.81   25.23
   5  -2   4   35.70    7.07
   5   2   4   36.16    7.37
   5  -4  -6  843.72   14.82
   5   4  -6  827.30   21.39
   3  -9  -7  123.50   15.86
   3   9  -7   90.86   13.57
   3 -10   3  861.92   21.61
   3  10   3  872.35   23.07
   0  -2  13   32.62    8.21
   0   2  13   18.65    5.11
   3  10  -5 6771.18  121.38
   3 -10  -5 6379.36  220.14
   4   5  -9   70.62   18.55
   4  -5  -9   95.22   11.92
   4   4   7  329.13   15.30
   4  -4   7  319.06   26.20
   0  -7  11  880.04   39.09
   0   7  11  790.01   36.10
   2   0 -13    9.04   10.42
   3   2  10  620.12   33.53
   3  -2  10  573.43   18.39
   4   0   8 1584.98   55.08
   2  10   6  904.30   37.45
   2 -10   6  941.96   26.94
   2   6  10   13.50    3.61
   2  -6  10    6.56    2.95
   2  11   4 1107.97   45.59
   2 -11   4 1077.98   49.27
   1  12  -4  680.65   25.61
   1 -12  -4  631.15   31.20
   1  -4  12  622.54   33.74
   1   4  12  618.50   27.14
   3  -2 -12   93.27   10.62
   3   2 -12  119.91   16.31
   5   5  -5  549.26   23.62
   5  -5  -5  572.11   20.56
   2   4  11   15.23   14.85
   2  -4  11   -2.41   11.88
   5   3  -7 2070.03   72.31
   5  -3  -7 1986.20   49.30
   4  -9  -1 1858.44   50.52
   4   9  -1 1816.57   58.77
   2   1 -13    9.89   10.87
   2  -1 -13   -3.44   14.04
   4   8   3 1004.53   37.43
   4  -8   3 1028.55   31.39
   4   1   8  429.60   19.34
   4  -1   8  441.97   18.92
   4   9  -2   42.15   11.03
   4  -9  -2   54.26   12.59
   5   4   3   97.54    9.44
   5  -4   3   76.00   17.99
   1   3 -13 2634.48   71.66
   1  -3 -13 2525.96   74.81
   5  -6  -2  210.37   15.72
   5   6  -2  197.84   18.28
   3   5   9   70.58   15.76
   3  -5   9   86.02    9.36
   5   6  -1  728.73   23.71
   5  -6  -1  774.21   22.08
   1  11   6  305.08   35.53
   1 -11   6  326.22   20.18
   3  -5 -11  586.12   35.92
   3   5 -11  568.67   26.38
   4   9   0 2369.48   67.29
   4  -9   0 2286.76  149.75
   5   5   2 1847.27   35.14
   5  -5   2 1866.25   49.90
   5   0  -8    5.65    6.01
   5  -6  -3   10.00    5.95
   5   6  -3    0.22    3.37
   2   5 -12  630.22   30.55
   2  -5 -12  606.34   77.28
   2  12  -1  338.78   22.18
   2 -12  -1  302.64   31.25
   4   9  -3 2099.85   54.78
   4  -9  -3 2209.97   66.88
   2  12   0 4357.07   81.32
   2 -12   0 4400.91   84.61
   5   1  -8  234.66   23.44
   5  -1  -8  226.42   17.33
   5  -3   4  292.35   21.28
   5   3   4  277.60   20.87
   5  -6   0  991.82   32.54
   5   6   0 1050.33   41.23
   2   8 -10 3639.30   90.02
   2  -8 -10 3558.86   79.95
   2  -2 -13  422.11   40.83
   2   2 -13  374.64   20.82
   4   2   8  237.82   21.69
   4  -2   8  263.95   20.04
   4  -8  -6  369.24   25.57
   4   8  -6  397.48   20.92
   0  -3  13  216.10   26.39
   0   3  13  305.46   22.87
   2  -9  -9  182.19   22.44
   2   9  -9  133.00   24.64
   2  12  -2   42.32    9.86
   2 -12  -2   46.21   13.81
   3   3  10  145.79   17.58
   3  -3  10  177.09   14.61
   0  11   7   72.60   18.11
   0 -11   7   42.65    8.55
   4   6   6  479.75   14.23
   4  -6   6  494.95   30.94
   1 -12   4  214.20   22.04
   1  12   4  253.57   26.55
   3  11  -1  429.82   13.25
   3 -11  -1  410.55   28.31
   1   9   9 3662.86  102.66
   1  -9   9 3726.55   63.58
   4   4 -10 3245.64   84.05
   4  -4 -10 3308.23  102.20
   3  -3 -12  400.39   28.39
   3   3 -12  372.60   30.24
   2  12   1  592.52   35.34
   2 -12   1  595.78   24.72
   4   7   5  202.72   25.65
   4  -7   5  180.90   19.31
   4  -9   1  468.13   32.05
   4   9   1  522.75   31.46
   1   6 -12    3.92    5.21
   1  -6 -12   20.29   13.45
   0 -12   5  229.85   21.44
   0  12   5  184.48   30.31
   1  11  -7  752.79   37.13
   1 -11  -7  782.71   27.05
   5   0   5  878.35   36.72
   3 -11   0  369.32   34.35
   3  11   0  355.76   13.92
   3  11  -2 1227.89   34.56
   3 -11  -2 1186.42   46.71
   5   6  -4   10.70    4.58
   5  -6  -4   16.27    4.21
   4   0 -11  -14.89    9.75
   2  11  -6  887.39   44.14
   2 -11  -6  973.65   41.83
   1   8  10   12.15    7.28
   1  -8  10   16.03   12.08
   5   2  -8  179.44   17.85
   5  -2  -8  142.22   14.31
   2   7 -11  393.95   38.85
   2  -7 -11  466.27   35.74
   5  -1   5  979.68   33.07
   5   1   5  948.15   27.95
   2   0  12 1103.09   33.46
   3   8   7 1196.20   56.55
   3  -8   7 1169.63   63.13
   3  10   4  311.71   27.82
   3 -10   4  286.55   20.73
   4  -9  -4 1491.87   53.68
   4   9  -4 1475.35   47.90
   4   1 -11  339.09   42.98
   4  -1 -11  268.83   37.50
   3 -10  -6  534.46   57.56
   3  10  -6  448.86   19.13
   3  -8  -9 1189.18   43.88
   3   8  -9 1191.94   43.16
   5  -6   1 3162.52   45.05
   5   6   1 3245.95   90.98
   5  -4  -7  275.54   25.28
   5   4  -7  334.19   35.13
   5  -5  -6  158.61   13.20
   5   5  -6  147.87   32.93
   0 -13   0    6.27   21.90
   0  13   0   21.09   14.22
   0   6  12  129.08   11.83
   0  -6  12  169.40   19.64
   3   7   8 5434.38  151.27
   3  -7   8 5513.76  101.89
   1  10   8 1582.38  113.30
   1 -10   8 1652.20   46.24
   1 -12  -5  316.36   33.71
   1  12  -5  312.14   32.28
   1   0  13  379.73   24.14
   2 -12  -3   26.88    7.40
   2  12  -3   25.10    7.95
   2   1  12   52.58   11.68
   2  -1  12   69.56    8.98
   1  -4 -13   27.80   13.50
   1   4 -13   24.74    7.76
   3  -7 -10  790.67   32.21
   3   7 -10  743.09   37.95
   4   5   7   10.50    5.96
   4  -5   7   27.49    5.93
   0 -13   1 1077.79   41.56
   0  13   1 1061.23   32.55
   2   3 -13  400.59   27.86
   2  -3 -13  402.37   41.42
   2  10  -8  683.28   42.40
   2 -10  -8  646.83   32.20
   4  -3   8   19.16    5.59
   4   3   8    6.38    5.71
   3 -11   1  116.83   12.24
   3  11   1  105.37   12.57
   3  11  -3  409.74   16.75
   3 -11  -3  400.16   35.23
   1   1  13 7943.48  130.43
   1  -1  13 7779.84  152.51
   2   8   9   32.99   11.42
   2  -8   9   43.97    9.12
   2   9   8   48.98   10.45
   2  -9   8   76.86   11.32
   1   5  12 2847.15   85.53
   1  -5  12 2923.54   90.36
   2 -12   2 2751.16   78.19
   2  12   2 2605.76   77.92
   2 -11   5  649.98   33.92
   2  11   5  631.28   35.39
   2   5  11  263.46   21.57
   2  -5  11  272.72   29.34
   4   8   4  951.48   41.26
   4  -8   4  842.02   31.90
   4   7  -8  534.28   23.86
   4  -7  -8  582.62   28.42
   5   2   5 2264.63   56.73
   5  -2   5 2213.36   57.29
   5   5   3 1178.06   44.26
   5  -5   3 1174.53   35.59
   4   6  -9  611.74   30.11
   4  -6  -9  578.71   40.91
   4   2 -11  192.32   22.05
   4  -2 -11  177.78   18.35
   3  -9   6 2733.75   79.35
   3   9   6 2670.92   86.14
   5  -4   4  131.37   14.23
   5   4   4  143.43   16.20
   3   9  -8   69.23   16.46
   3  -9  -8  115.30   11.37
   4  -9   2 5830.01  149.16
   4   9   2 5915.71  167.59
   0   4  13   49.40    4.56
   0  -4  13   55.29   12.36
   2   2  12  122.85   14.91
   2  -2  12  113.17   16.78
   1   9 -10   80.69   23.47
   1  -9 -10  139.41   18.24
   0 -13   2   42.42   13.62
   0  13   2   40.57    9.57
   1   7  11  436.15   16.94
   1  -7  11  468.31   28.48
   5   3  -8  218.37   32.12
   5  -3  -8  239.35   18.21
   5  -6  -5  670.96   18.75
   5   6  -5  615.56   25.69
   3  -4  10   26.77    6.73
   3   4  10   46.21   10.74
   1  -2  13  100.53   18.07
   1   2  13   81.98   17.46
   0   9  10  523.08   39.97
   0  -9  10  507.50   24.21
   3  -4 -12  489.45   45.28
   3   4 -12  487.37   38.93
   3  -6   9  294.18   24.23
   3   6   9  313.75   31.67
   1 -13   0  436.96   29.94
   1  13   0  461.09   45.42
   3  -6 -11 1855.50   32.40
   3   6 -11 1861.23   62.84
   2   7  10  323.33   21.23
   2  -7  10  322.92   18.24
   1  -8 -11   30.52   15.27
   1   8 -11   34.82    7.21
   4   9  -5  304.77   31.13
   4  -9  -5  350.50   30.98
   2  10   7  935.25   44.96
   2 -10   7  773.76   13.07
   1 -13  -1   36.97   11.44
   1  13  -1   21.98    7.44
   2 -12  -4   40.04   28.87
   2  12  -4   22.17    5.98
   1 -10  -9  266.58   20.75
   1  10  -9  347.19   42.21
   5  -6   2 1492.83   43.55
   5   6   2 1569.69   49.24
   3 -11   2   20.32    4.73
   3  11   2   26.05    7.26
   4   8  -7  183.03   32.74
   4  -8  -7  124.21   14.85
   0  10   9   15.22    8.68
   0 -10   9   36.41    7.44
   3 -11  -4  127.05   23.08
   3  11  -4  134.61   12.86
   2  -6 -12   97.74   21.95
   2   6 -12   76.21   10.06
   1  12   5  235.30   25.21
   1 -12   5  243.90   23.61
   5  -7  -2  176.67   15.98
   5   7  -2  162.10   21.27
   4   5 -10  391.98   40.23
   4  -5 -10  332.96   28.31
   1 -13   1   47.09   11.98
   1  13   1   32.75    9.53
   1  11   7 1335.65   83.83
   1 -11   7 1281.80   47.14
   5   7  -1 3797.87   69.75
   5  -7  -1 3847.36   66.67
   0  -8  11  939.00   63.08
   0   8  11  945.48   36.04
   5   3   5 2449.99   63.95
   5  -3   5 2460.91   59.00
   5   0  -9  775.12   23.47
   4   3 -11  558.21   42.02
   4  -3 -11  502.86   24.33
   2  12   3 3147.52   86.27
   2 -12   3 3090.20   43.54
   1 -13  -2   98.33   17.16
   1  13  -2  145.51   18.01
   2  -4 -13 1451.83   67.14
   2   4 -13 1420.50   63.57
   5  -7  -3 5593.95  125.71
   5   7  -3 5619.11  111.07
   4  -4   8   11.32    4.88
   4   4   8    4.84    5.18
   0 -12   6 1044.39   40.60
   0  12   6 1091.12   50.36
   0 -13   3   16.03    7.59
   0  13   3   22.21    6.60
   2  -3  12 1436.01   53.12
   2   3  12 1440.02   53.99
   5   1  -9 1866.60   34.31
   5  -1  -9 1919.64   58.84
   1   0 -14   14.97    9.65
   5   7   0 3892.82   77.86
   5  -7   0 3765.45  122.53
   5  -5  -7 2589.53   63.49
   5   5  -7 2468.23   79.69
   1  -3  13 3088.88   92.85
   1   3  13 3141.23   74.52
   3   0  11  573.95   20.02
   2  11  -7 2246.67   75.54
   2 -11  -7 2303.48   76.00
   1   5 -13 2564.46   62.21
   1  -5 -13 2726.28   91.28
   3 -10   5 1061.50   46.17
   3  10   5 1077.26   35.06
   1 -12  -6  947.29   43.54
   1  12  -6  915.27   41.73
   1   1 -14 1240.22   52.70
   1  -1 -14 1281.99   48.85
   3   0 -13 3376.96   75.15
   3 -10  -7   58.23   19.44
   3  10  -7   24.35    8.95
   1 -13   2  189.89   18.95
   1  13   2  185.09   24.39
   4  -9   3  585.64   29.81
   4   9   3  608.67   45.79
   4   0   9    6.66    4.44
   3   1  11   54.23    8.23
   3  -1  11   49.29    9.71
   4  -7   6 1905.94   61.81
   4   7   6 1851.20   13.37
   5   4  -8   38.67   16.28
   5  -4  -8   36.21    7.73
   3  -1 -13  271.11   20.32
   3   1 -13  280.06   46.94
   5   6  -6   30.68    9.27
   5  -6  -6   41.23    6.78
   1   7 -12  735.82   27.33
   1  -7 -12  769.39   48.26
   0  11   8  125.66   18.66
   0 -11   8  127.84   12.99
   4   1   9 1163.04   41.80
   4  -1   9 1182.01   35.97
   5  -2  -9 1567.18   50.98
   5   2  -9 1672.07   53.85
   5   0   6   13.45    5.88
   1  11  -8  234.12   30.81
   1 -11  -8  201.12   18.24
   5  -7  -4  366.61   25.59
   5   7  -4  366.60   18.58
   1 -13  -3  345.61   36.35
   1  13  -3  404.04   31.00
   4  -6   7  872.03   34.40
   4   6   7  861.61   33.49
   5  -5   4 3938.92   69.53
   5   5   4 3889.83   99.45
   4  10  -1   95.57   15.19
   4 -10  -1  130.60   18.84
   0   0  14  351.56   27.54
   3  11   3   18.05    5.98
   3 -11   3    3.71    6.46
   0   5  13  100.49   13.48
   0  -5  13   81.12   22.29
   4  10  -2 2331.55   72.55
   4 -10  -2 2465.20   81.15
   3  11  -5 2541.70   70.51
   3 -11  -5 2567.06  130.80
   5  -1   6  499.75   27.38
   5   1   6  556.40   20.56
   1   6  12   24.51   14.37
   1  -6  12   26.20    9.38
   2 -12  -5   70.27   22.05
   2  12  -5   63.94    9.77
   4   8   5  628.92   15.56
   4  -8   5  683.27   24.10
   1   2 -14  296.39   24.09
   1  -2 -14  276.47   22.49
   2   6  11   27.29    8.00
   2  -6  11   29.47    8.26
   5  -7   1 1403.51   45.97
   5   7   1 1525.45   50.22
   2   9 -10  132.91   16.19
   2  -9 -10  120.57   22.69
   6   0  -2   17.00    5.91
   3   5  10  470.96   25.09
   3  -5  10  399.77   17.95
   0   7  1210992.32   99.23
   0  -7  1211120.45   76.38
   4   9  -6 3681.60   86.31
   4  -9  -6 3837.85  130.27
   0   1  14 7901.46  131.42
   0  -1  14 7955.08  144.95
   2  11   6  261.54   23.31
   2 -11   6  203.46   18.68
   3   2  11 1392.92   51.15
   3  -2  11 1351.33   51.64
   5  -6   3   12.69    5.01
   5   6   3   20.19    8.43
   4 -10   0 1265.97   55.16
   4  10   0 1216.06   50.18
   3  -5 -12 3069.96   54.85
   3   5 -12 3097.85   36.66
   6   0  -1    4.43    3.75
   3  -2 -13 1623.97   58.61
   3   2 -13 1524.82   66.12
   6   0  -3    2.61    2.55
   6  -1  -2 3361.19   58.82
   6   1  -2 3102.64   27.47
   2  -8 -11   28.95   10.37
   2   8 -11   15.19    6.72
   5   4   5 5183.14   93.25
   5  -4   5 4946.40   90.74
   4   2   9  632.83   23.94
   4  -2   9  607.59   17.51
   4  10  -3 1505.88   50.56
   4 -10  -3 1632.34   56.66
   4   4 -11 1502.11   51.95
   4  -4 -11 1483.85   50.00
   0 -13   4  229.50   25.48
   0  13   4  201.34   25.51
   6   1  -1  100.03   10.82
   6  -1  -1   88.57   10.94
   6   1  -3   58.20   21.61
   6  -1  -3   58.63   10.86
   3  -8   8 1192.06   41.87
   3   8   8 1168.84   59.05
   2  12   4 3160.46   72.65
   2 -12   4 3123.69   52.79
   1 -13   3  247.31   25.87
   1  13   3  270.64   23.90
   2   4  12 1042.67   48.27
   2  -4  12 1028.57   50.38
   5  -2   6  131.61   13.67
   5   2   6  135.56   15.29
   4   7  -9 1216.81   50.74
   4  -7  -9 1152.17   55.41
   2  10  -9   25.07    8.55
   2 -10  -9   18.62   10.87
   3  -8 -10  531.28   34.26
   3   8 -10  448.97   62.09
   1   9  10   95.20   22.19
   1  -9  10  119.29   13.03
   2   0 -14   21.20    7.59
   0   2  14   50.69    9.84
   0  -2  14   47.39   10.11
   1  -4  13 1071.62   63.03
   1   4  13 1108.11   53.89
   5   3  -9   33.47   10.01
   5  -3  -9   44.65   10.61
   3  -9   7  737.03   29.26
   3   9   7  773.84   33.30
   1  10   9 2161.15   66.94
   1 -10   9 2061.53   54.04
   6   0   0  934.07   35.51
   2  -1 -14 1342.13   50.64
   2   1 -14 1416.46   51.67
   5   7  -5 3354.34   70.27
   5  -7  -5 3259.67   89.17
   6   0  -4  242.89   16.15
   4 -10   1  242.84   26.95
   4  10   1  203.56   27.45
   3   9  -9 1935.85   70.56
   3  -9  -9 2033.75   70.47
   6   2  -2  711.79   41.33
   6  -2  -2  626.24   32.70
   2   5 -13 1541.45   53.05
   2  -5 -13 1476.16   88.80
   1  12   6  196.88   24.80
   1 -12   6  223.05   24.61
   4  -5   8  583.11   18.42
   4   5   8  625.06   38.11
   4  -8  -8 1326.69   44.53
   4   8  -8 1242.14   55.03
   4   0 -12 2087.73   69.29
   1 -13  -4  417.01   38.28
   1  13  -4  411.11   32.76
   4   6 -10  855.10   52.84
   4  -6 -10  712.83   29.66
   6   1   0 3047.89   31.65
   6  -1   0 3082.73   39.08
   3   7   9  554.65   23.50
   3  -7   9  588.81   29.04
   6   1  -4 3663.09  110.90
   6  -1  -4 3707.39   73.84
   1  -3 -14 1375.84   49.40
   1   3 -14 1352.97   50.28
   6  -2  -1  379.70   18.38
   6   2  -1  372.92   22.99
   6  -2  -3  199.95   25.74
   6   2  -3  215.99   27.89
   3  -7 -11 3876.64   75.16
   3   7 -11 3779.07   72.84
   3   3  11   11.48    7.85
   3  -3  11    6.78    3.25
   4  -1 -12  448.39   37.86
   4   1 -12  420.75   29.54
   2   9   9  204.17   25.52
   2  -9   9  196.77   21.90
   4 -10  -4 1642.87   59.61
   4  10  -4 1568.08   67.72
   5   7   2 1014.98   40.89
   5  -7   2  970.49   30.40
   1   8  11  729.15   23.15
   1  -8  11  819.92   29.74
   3   3 -13  155.88   26.65
   3  -3 -13  139.12   19.70
   4   9   4 1217.12   69.33
   4  -9   4 1151.73   30.85
   2   7 -12 1281.45   48.59
   2  -7 -12 1237.79   52.40
   4  -3   9 1328.94   48.78
   4   3   9 1343.10   45.33
   5   5  -8  507.54   25.77
   5  -5  -8  579.02   18.15
   2  -2 -14   53.73   17.73
   2   2 -14   71.73   16.92
   5  -6  -7    8.22    3.11
   5   6  -7   17.74    9.67
   2   8  10  650.67   30.96
   2  -8  10  622.31   28.27
   0  12   7  207.89   22.73
   0 -12   7  221.73   18.69
   2  13  -1 6234.82  113.09
   2 -13  -1 6168.77  113.63
   5  -3   6  816.76   33.31
   5   3   6  832.86   21.83
   1  -6 -13   36.11   15.61
   1   6 -13   21.55    5.80
   3  11   4  484.54   21.82
   3 -11   4  480.24   17.23
   3  12  -1 2101.24   57.40
   3 -12  -1 2135.07   71.70
   2  10   8 1566.06   67.50
   2 -10   8 1589.43   47.06
   6   2   0   48.73    8.34
   6  -2   0   53.88   12.91
   2  13   0  451.41   38.63
   2 -13   0  354.04   33.29
   3  11  -6  118.96   15.76
   3 -11  -6   89.95   20.82
   6   2  -4  112.59   16.32
   6  -2  -4  106.26   15.71
   0   3  14 6737.94  113.79
   0  -3  14 6836.23  124.64
   6   0   1    7.03    6.66
   1 -11   8 1057.26   36.54
   1  11   8 1121.03   44.61
   1  12  -7   39.41   12.89
   1 -12  -7   60.96   12.18
   3  12   0   10.07    5.23
   3 -12   0    0.19    7.98
   4   2 -12 2292.91  103.32
   4  -2 -12 2437.05  108.17
   3 -12  -2  612.28   42.00
   3  12  -2  643.72   20.31
   6   0  -5    9.08    3.45
   5  -8  -2  657.26   23.31
   5   8  -2  651.15   22.93
   2  12  -6 1117.09   44.70
   2 -12  -6 1209.73   51.00
   3  10   6   25.19   10.97
   3 -10   6   34.31    8.25
   5   8  -1   12.22   20.62
   5  -8  -1   25.32   10.75
   2 -13  -2   73.91   14.84
   2  13  -2   76.59   14.90
   5   0 -10   10.49    8.50
   3  10  -8   86.27   27.48
   3 -10  -8  126.01   19.21
   6  -3  -2   41.00   12.38
   6   3  -2   87.46   12.74
   2  11  -8 4573.24   85.39
   2 -11  -8 4709.00  113.91
   4  10   2  282.94   19.49
   4 -10   2  271.94   34.79
   6  -1   1  244.36   27.34
   6   1   1  279.72   19.51
   1  -9 -11 2249.56   80.88
   1   9 -11 2252.33   59.75
   1 -13   4  276.96   32.90
   1  13   4  193.32   46.58
   6   1  -5  215.49   23.74
   6  -1  -5  172.49   23.12
   1 -10 -10  209.16   20.65
   1  10 -10  248.58   31.22
   4   9  -7   17.08   16.82
   4  -9  -7   20.73   10.38
   2 -13   1  649.02   23.30
   2  13   1  633.70   33.42
   5   6   4   87.91    9.79
   5  -6   4   69.05   10.99
   6   3  -1   17.74    4.84
   6  -3  -1   11.37    6.96
   5   1 -10   46.17   11.48
   5  -1 -10   26.89   11.35
   6  -3  -3  449.32   29.78
   6   3  -3  508.02   24.34
   5  -8  -3   38.32    7.96
   5   8  -3   27.33    5.64
   0 -13   5   19.48    8.83
   0  13   5    8.15    8.66
   5  -5   5 2534.46   68.81
   5   5   5 2475.71   69.94
   0  -6  13  630.37   55.49
   0   6  13  635.45   17.80
   5  -4  -9  834.19   23.79
   5   4  -9  777.99   34.77
   0 -10  10   15.49    6.30
   0  10  10   22.00    9.35
   4   5 -11   47.45   15.76
   4  -5 -11   33.46    9.79
   2   0  13   14.53    4.64
   0   9  11 1913.61   68.32
   0  -9  11 1987.73   58.31
   5   8   0  350.58   26.22
   5  -8   0  388.04   34.92
   5  -7  -6  238.36   19.47
   5   7  -6  198.12   24.15
   3   6  10   33.51    7.81
   3  -6  10   22.39    8.36
   3 -12   1 1334.22   48.74
   3  12   1 1316.47   46.19
   3  12  -3    2.22    7.53
   3 -12  -3   26.40   12.68
   2   5  12  148.76   18.98
   2  -5  12  150.50   17.66
   4  10  -5  915.24   35.37
   4 -10  -5  969.03   45.20
   3   6 -12   77.89   15.95
   3  -6 -12   96.67   15.69
   2  -1  13    0.55    3.35
   2   1  13    8.95    7.33
   2  -3 -14 2134.94   64.26
   2   3 -14 1946.45   52.73
   2  12   5   31.83    9.60
   2 -12   5   57.44    9.84
   1  -4 -14   80.89   13.82
   1   4 -14   89.60   13.06
   4   7   7 2989.79   89.09
   4  -7   7 2706.68   69.76
   6   2   1  308.05   24.15
   6  -2   1  330.75   26.93
   1  13  -5  960.18   43.56
   1 -13  -5  955.40   46.29
   1  -5  13 1892.81   91.22
   1   5  13 1931.65   58.18
   2  13  -3  800.31   23.50
   2 -13  -3  860.89   46.51
   3  -4  11  657.52   13.71
   3   4  11  714.99   35.50
   4   8   6 1095.87   49.57
   4  -8   6 1027.05   32.09
   6  -2  -5  266.49   28.55
   6   2  -5  304.22   26.92
   1   7  12  615.27   68.17
   1  -7  12  639.67   29.65
   6   3   0  818.46   21.30
   6  -3   0  846.03   32.13
   6   3  -4 2089.95   72.20
   6  -3  -4 1932.82   56.24
   1   0  14    6.55    5.82
   2  -7  11    9.62    4.06
   2   7  11   19.23    5.51
   3   4 -13   17.57    9.17
   3  -4 -13   59.78   14.14
   5   2 -10  147.73   19.50
   5  -2 -10  158.42   19.67
   1   8 -12 1530.64   47.71
   1  -8 -12 1511.90   63.39
   4  -4   9  773.14   19.43
   4   4   9  782.32   26.84
   5  -7   3 2844.55   71.74
   5   7   3 2984.04   63.31
   4  -3 -12  935.70   42.22
   4   3 -12 1032.57   68.03
   2  11   7   16.88   10.41
   2 -11   7    1.55    5.82
   5   0   7 3455.19   79.48
   5   8  -4  275.09   17.90
   5  -8  -4  277.04   18.92
   1 -11  -9 4770.98   80.65
   1  11  -9 4907.99  105.54
   2 -13   2  247.47   31.17
   2  13   2  274.51   28.68
   1  -1  14   -4.91    4.65
   1   1  14    4.62    6.33
   0 -11   9  632.14   31.77
   0  11   9  723.37   41.11
   0  14   0  393.08   49.71
   0 -14   0  449.12   32.76
   5   4   6   76.68   13.98
   5  -4   6   84.83   14.54
   5   1   7  226.99   22.25
   5  -1   7  205.40   16.74
   6   0   2   89.19   10.76
   2   2  13   16.91    8.00
   2  -2  13    9.63   12.83
   5  -8   1  167.87   22.17
   5   8   1  128.13   19.98
   0  14   1 1420.98   44.80
   0 -14   1 1422.03   56.60
   6   0  -6  425.09   14.04
   2  -6 -13   24.93   17.07
   2   6 -13   20.11    7.47
   0  -8  12   34.56   11.20
   0   8  12   12.02    3.89
   4   6   8 3104.75   64.48
   4  -6   8 3043.98   51.75
   0  -4  14   51.58   11.16
   0   4  14   26.90    7.47
   6   1   2 1542.89   51.74
   6  -1   2 1653.55   48.30
   3  12   2 2852.33   91.51
   3 -12   2 2834.89   81.82
   3 -12  -4   53.29   16.24
   3  12  -4   26.81    6.56
   6   1  -6 1260.56   50.81
   6  -1  -6 1246.89   55.15
   6  -4  -2 2158.08   74.98
   6   4  -2 2301.40   73.82
   4  10   3  517.40   37.66
   4 -10   3  475.97   44.24
   1  12   7 3595.72   82.40
   1 -12   7 3513.74   57.33
   4   9   5  475.35   22.19
   4  -9   5  422.09   22.15
   1   2  14  562.17   22.14
   1  -2  14  547.60   30.28
   6   4  -1 5695.96  102.13
   6  -4  -1 5660.22  119.87
   6   4  -3 1318.44   49.10
   6  -4  -3 1284.71   51.51
   6   3   1  369.79   31.99
   6  -3   1  358.05   22.71
   4   0  10 1483.00   49.97
   6   3  -5  318.61   33.99
   6  -3  -5  321.80   27.81
   4   8  -9  205.31   28.11
   4  -8  -9  240.17   22.04
   5   2   7   95.91   11.53
   5  -2   7   71.81    9.25
   2  13  -4 5745.63  104.21
   2 -13  -4 5914.93  154.19
   4  -7 -10 1850.67   37.32
   4   7 -10 2014.11   67.71
   3  11   5  748.56   33.60
   3 -11   5  719.14   18.01
   0  14   2  166.46   16.40
   0 -14   2  191.27   29.00
   5   6  -8  792.22   30.50
   5  -6  -8  769.95   30.61
   5   3 -10  275.14   26.34
   5  -3 -10  249.04   22.54
   3  11  -7 2575.82   95.38
   3 -11  -7 2657.66  107.31
   2   9 -11  364.77   34.95
   2  -9 -11  341.92   41.13
   4  -1  10 1347.41   41.68
   4   1  10 1312.66   57.56
   1 -13   5  240.48   21.27
   1  13   5  229.52   25.09
   6  -2   2   62.89    8.72
   6   2   2   81.72   10.03
   2   4 -14 3957.54   86.81
   2  -4 -14 3968.78  106.48
   5  -8  -5    7.93    3.72
   5   8  -5   -0.69    5.78
   2  10 -10 1206.55   44.48
   2 -10 -10 1164.10   52.41
   6  -2  -6  192.21   24.42
   6   2  -6  255.38   26.48
   1 -14   0   11.87    8.73
   1  14   0    1.37   12.51
   3   9   8  474.92   32.58
   3  -9   8  481.96   26.14
   4  10  -6    9.65    5.36
   4 -10  -6   33.82   15.56
   5   5  -9 1404.78   61.25
   5  -5  -9 1287.52   38.03
   2  12  -7  659.95   29.46
   2 -12  -7  706.74   53.41
   3   0  12    2.09    6.06
   1  14  -1   34.42   10.41
   1 -14  -1   16.49    8.80
   3  -9 -10  182.43   20.98
   3   9 -10  138.81   25.72
   2 -13   3 3111.73  102.20
   2  13   3 3173.69   66.50
   6   4   0  154.73   20.96
   6  -4   0  124.68   14.61
   2   3  13 1010.45   53.95
   2  -3  13  898.92   60.36
   3  -8   9 2507.04   79.37
   3   8   9 2740.62   86.40
   6   4  -4  667.16   49.17
   6  -4  -4  663.50   40.44
   5   7  -7  120.34   16.06
   5  -7  -7  111.10   10.07
   4  11  -1  428.71   34.46
   4 -11  -1  428.48   40.57
   3   0 -14    9.97    9.23
   3   8 -11  541.84   51.07
   3  -8 -11  539.52   33.17
   0 -13   6  864.01   35.11
   0  13   6  906.18   44.83
   4 -11  -2  153.21   28.07
   4  11  -2  120.12   15.82
   4   4 -12   71.28   17.94
   4  -4 -12   64.97   14.67
   3  -1  12    8.54    5.89
   3   1  12    1.29    8.84
   1  -7 -13 7911.21  159.38
   1   7 -13 7563.30  125.14
   5  -8   2   19.78    8.62
   5   8   2    2.31    6.16
   1 -14   1  932.45   42.23
   1  14   1  923.70   41.02
   1  -5 -14   13.02    6.34
   1   5 -14    4.81    5.02
   3  -1 -14  878.93   46.51
   3   1 -14  861.93   33.72
   2  -8 -12   82.08   22.15
   2   8 -12  107.88   20.78
   0  12   8  270.60   27.76
   0 -12   8  261.47   23.28
   4  -9  -8  754.21   26.25
   4   9  -8  834.56   34.19
   5   6   5  194.24   25.08
   5  -6   5  162.91   18.79
   4  -2  10 2122.45   56.58
   4   2  10 2173.45  103.86
   3  -5  11  176.13   15.50
   3   5  11  197.03   20.61
   1  12  -8  319.23   33.20
   1 -12  -8  257.51   23.88
   4  11   0  314.16   26.57
   4 -11   0  329.53   39.97
   4  -6 -11   17.87    6.07
   4   6 -11   -8.35   15.22
   1  14  -2   26.51    7.89
   1 -14  -2   17.90   11.95
   1 -10  10  676.08   36.92
   1  10  10  730.38   43.64
   1 -13  -6   94.52   11.25
   1  13  -6   92.34   16.67
   1   3  14   21.81    6.64
   1  -3  14   23.94   19.02
   3   5 -13   22.19    6.88
   3  -5 -13   19.04   16.32
   1   0 -15  351.33   32.32
   3  12   3  156.91   26.43
   3 -12   3  184.46   29.86
   4   5   9   33.21    9.34
   4  -5   9   30.38    8.52
   0 -14   3  187.94   17.00
   0  14   3  157.66   19.88
   2   6  12  972.94   46.55
   2  -6  12  995.25   40.42
   3 -12  -5  621.89   36.63
   3  12  -5  586.36   30.93
   3  10   7 2501.68   83.49
   3 -10   7 2533.75   72.22
   5   3   7 2120.19   66.92
   5  -3   7 2161.12   60.13
   4 -11  -3  538.64   50.79
   4  11  -3  461.54   12.40
   1  -9  11 2714.25   73.45
   1   9  11 2735.56   85.72
   3  10  -9  168.99   19.29
   3 -10  -9  204.47   25.43
   5   7   4  110.48   13.88
   5  -7   4  136.09   22.14
   6   0   3    4.86    7.02
   1  -1 -15 2046.13   60.04
   1   1 -15 2088.71   69.11
   2  12   6 1207.85   40.98
   2 -12   6 1232.80   41.20
   0   7  13   14.80    5.64
   0  -7  13   16.56   13.52
   1  -6  13 1083.04   55.28
   1   6  13 1091.90   50.64
   6   0  -7    6.55    3.82
   3  -2  12    7.31    3.38
   3   2  12   29.35   10.10
   5  -5   6   14.34    7.69
   5   5   6    1.12    4.17
   2  11  -9  138.16   17.74
   2 -11  -9  178.58   25.90
   6   3   2 2716.49   85.10
   6  -3   2 2699.13   70.70
   6  -1   3  111.33   18.15
   6   1   3  105.45   12.81
   6   3  -6 3515.84  115.47
   6  -3  -6 3538.26  135.39
   3  -2 -14  280.45   31.36
   3   2 -14  288.66   29.44
   1  14   2   62.87   25.34
   1 -14   2   66.18   21.83
   3   7  10   37.99    9.92
   3  -7  10   34.71   12.50
   0  -5  14 1745.63   69.71
   0   5  14 1745.38   73.45
   6  -4   1   26.63    6.12
   6   4   1   17.99    5.89
   2  -9  10 1071.02   41.56
   2   9  10 1036.09   55.19
   6  -1  -7    6.35    8.03
   6   1  -7   13.52    7.92
   2 -10   9  115.89   15.98
   2  10   9  119.14   18.24
   6  -4  -5 1040.67   43.92
   6   4  -5 1034.88   53.79
   1  11   9  162.99   21.86
   1 -11   9  209.63   18.05
   3  -7 -12 2653.85   86.27
   3   7 -12 2749.48   83.42
   2 -13  -5   65.18   27.65
   2  13  -5   76.52   12.91
   4  11   1  109.43   18.01
   4 -11   1  147.60   25.85
   5   4 -10    5.38    8.81
   5  -4 -10    2.82    5.63
   6   5  -2 1453.56   50.85
   6  -5  -2 1395.69   54.36
   4  10   4 1734.03   79.83
   4 -10   4 1690.11   49.00
   4   0 -13   16.16    9.77
   5   0 -11  125.76   15.29
   5   9  -2    8.48    5.77
   5  -9  -2   47.10   11.69
   1  14  -3   46.13   14.23
   1 -14  -3   50.36   10.90
   5  -9  -1 5083.54  123.35
   5   9  -1 5051.14  105.00
   6   5  -1  337.54   18.74
   6  -5  -1  357.13   16.73
   5  -8  -6   31.85    7.26
   5   8  -6   35.46   12.10
   6  -5  -3  185.11   22.69
   6   5  -3  230.10   17.98
   0   0  15    2.13    5.37
   1  -2 -15  450.51   27.74
   1   2 -15  502.55   38.07
   4  -1 -13  653.15   25.84
   4   1 -13  707.48   33.76
   4  -3  10    8.66    5.53
   4   3  10   19.35    8.74
   5   1 -11  109.22   14.44
   5  -1 -11   90.00   12.23
   4 -11  -4  632.26   47.77
   4  11  -4  560.13   18.61
   2   4  13  125.61   30.66
   2  -4  13   96.02   37.51
   4   8   7   36.61   20.84
   4  -8   7   77.21   11.31
   6  -2   3  239.76   24.24
   6   2   3  211.98   19.47
   0  -1  15   32.72    7.40
   0   1  15   29.44    7.62
   5   9  -3 1412.66   75.93
   5  -9  -3 1428.84   50.58
   2 -13   4   32.37   11.19
   2  13   4   25.43    9.81
   6  -2  -7 1072.10   56.67
   6   2  -7 1152.36   60.85
   1   8  12   85.72   10.85
   1  -8  12   72.54   14.61
   2  -5 -14  587.65  119.64
   2   5 -14  568.63   26.12
   2  -8  11  377.31   16.92
   2   8  11  414.34   31.05
   5  -9   0   49.30   19.77
   5   9   0   24.79   11.33
   2   7 -13  589.32   31.59
   2  -7 -13  633.40   42.51
   4   7   8 3167.44   47.49
   4  -7   8 3192.61   64.51
   1  10 -11  135.22   17.04
   1 -10 -11  170.66   20.01
   5   8   3  439.28   43.97
   5  -8   3  453.93   14.25
   2   0 -15    6.21   10.08
   3   3  12 2262.00   70.97
   3  -3  12 2126.83   75.78
   2  11   8  246.96   28.52
   2 -11   8  205.46   14.59
   6   5   0 2544.81   67.66
   6  -5   0 2568.74   65.67
   4  10  -7  114.65   15.79
   4 -10  -7  119.10   38.96
   0 -14   4   80.89   15.38
   0  14   4   66.07   16.98
   6  -5  -4  440.31   20.57
   6   5  -4  482.30   34.87
   1   4  14  130.46   18.58
   1  -4  14  195.74   37.22
   3   3 -14  451.87   43.03
   3  -3 -14  495.99   41.69
   4   2 -13   14.79   11.23
   4  -2 -13   21.37    8.23
   1  13   6   11.24   14.04
   1 -13   6    2.30    6.54
   5  -2 -11  262.14   24.15
   5   2 -11  261.71   25.00
   1 -14   3  354.87   36.59
   1  14   3  341.38   22.21
   2   1 -15   47.37   17.12
   2  -1 -15   55.16   13.92
   4   9   6   27.77   17.04
   4  -9   6   16.05    7.07
   4   5 -12   14.44   10.01
   4  -5 -12   43.24   10.48
   5   4   7 1469.08   71.36
   5  -4   7 1458.89   52.94
   3  11   6  192.87   23.18
   3 -11   6  217.84   23.83
   0  10  11   79.69   15.28
   0 -10  11   70.81    9.34
   3 -11  -8   96.37   24.23
   3  11  -8   88.74   12.54
   1   9 -12   43.89   11.68
   1  -9 -12   43.78   11.27
   0  -2  15   57.73   15.58
   0   2  15   21.71    7.52
   4 -11   2  601.95   28.88
   4  11   2  622.59   23.17
   5   0   8    9.58    6.83
   5   6  -9 2103.80   72.37
   5  -6  -9 1894.90   37.36
   3  12   4   16.08    4.15
   3 -12   4   38.25    9.47
   1 -11 -10  268.85   23.63
   1  11 -10  235.47   34.47
   5   9  -4  164.86   19.37
   5  -9  -4  142.96   14.92
   6  -4   2   53.70    8.58
   6   4   2   64.33    8.74
   5  -7  -8   21.66    7.77
   5   7  -8   42.55   11.36
   3 -12  -6  223.26   28.64
   3  12  -6  188.98   27.61
   6  -4  -6  526.51   41.91
   6   4  -6  595.72   22.29
   1  -3 -15  554.76   21.80
   1   3 -15  558.97   31.70
   1  12   8   17.63   12.03
   1 -12   8   24.22    5.93
   5   1   8   11.28    8.75
   5  -1   8    9.25    6.30
   0 -11  10   25.78    7.58
   0  11  10   21.70   12.75
   1  14  -4  713.02   39.71
   1 -14  -4  721.64   33.05
   1  -6 -14 1864.72   82.97
   1   6 -14 1788.34   49.97
   5   9   1   25.87    7.76
   5  -9   1   46.63   10.81
   6   3   3  251.87   21.77
   6  -3   3  228.45   19.72
   2  12  -8  585.82   34.69
   2 -12  -8  627.04   39.73
   0   9  12 1221.76   43.98
   0  -9  12 1306.38   58.19
   0  13   7  136.54   34.48
   0 -13   7  110.57   12.66
   3   6  11  275.80   14.61
   3  -6  11  262.05   15.19
   6   3  -7  851.19   39.99
   6  -3  -7  704.89   42.96
   2  -2 -15  294.20   28.79
   2   2 -15  334.08   30.10
   4  11  -5  409.72   28.15
   4 -11  -5  451.83   34.97
   3  13  -1   10.35    3.82
   3 -13  -1   62.48   16.63
   4  -8 -10 1564.69   50.07
   4   8 -10 1640.51   64.54
   3  -6 -13  163.76   37.99
   3   6 -13  129.20   20.63
   6   0   4  153.50   24.49
   6  -5   1    6.55    4.55
   6   5   1   10.30    2.99
   1 -13  -7 1139.88   50.53
   1  13  -7 1158.74   53.30
   4  -4  10   45.41    7.08
   4   4  10   36.33    9.76
   4  -6   9  689.06   47.74
   4   6   9  769.09   48.31
   3  13   0 1694.05   58.39
   3 -13   0 1618.97   54.17
   3 -13  -2    6.74   18.62
   3  13  -2   11.06    4.73
   6   5  -5  528.25   52.83
   6  -5  -5  531.26   23.30
   6   0  -8  141.34   20.35
   2 -13  -6 2531.71   89.06
   2  13  -6 2437.88   73.91
   5  -5 -10  351.93   25.63
   5   5 -10  321.18   48.48
   6   1   4  290.43   24.26
   6  -1   4  290.27   28.89
   4   3 -13   41.39   15.79
   4  -3 -13   47.44   12.66
   5   7   5   15.38    4.70
   5  -7   5    5.51    7.25
   5  -3 -11   15.45    7.13
   5   3 -11   15.61    9.45
   2  14  -1   27.21   10.59
   2 -14  -1   13.58    8.13
   5   2   8  353.79   20.03
   5  -2   8  320.85   31.84
   5   6   6   22.79    8.78
   5  -6   6   39.75   10.42
   4   9  -9  203.11   27.11
   4  -9  -9  148.83   15.36
   6   1  -8 4265.38   91.02
   6  -1  -8 4164.58   92.81
   4  -7 -11  323.12   53.76
   4   7 -11  333.70   32.55
   2  14   0  705.67   32.43
   2 -14   0  782.66   26.96
   5  -8  -7 2646.60   60.39
   5   8  -7 2592.04   75.81
   0   3  15  257.29   24.39
   0  -3  15  244.31   33.12
   0  -6  14  964.77   45.27
   0   6  14  994.52   26.19
   2  -7  12  710.70   31.10
   2   7  12  670.89   39.22
   3  -4  12  161.79   25.04
   3   4  12  167.69   22.49
   1  -8 -13   28.96   19.83
   1   8 -13   24.77   12.27
   2   5  13   26.16    7.13
   2  -5  13   34.60    5.87
   4  10   5  241.52   11.85
   4 -10   5  256.88   21.41
   5   9  -5  243.53   22.89
   5  -9  -5  235.19   23.03
   2 -14  -2   69.36   15.00
   2  14  -2   34.59   10.55
   6   6  -2  372.80   22.08
   6  -6  -2  286.89   30.65
   3   4 -14  591.60   34.72
   3  -4 -14  682.30   41.22
   3  13   1 1439.89   53.82
   3 -13   1 1308.13   56.35
   3 -13  -3  244.67   28.13
   3  13  -3  334.43   22.93
   1   7  13 1380.08   60.92
   1  -7  13 1614.92   68.97
   1 -14   4 4344.60  103.82
   1  14   4 4500.51  116.14
   2  12   7   19.97   11.23
   2 -12   7   14.02    3.71
   1 -12  -9   29.92    6.93
   1  12  -9   13.38   12.91
   3  -9   9    7.66    7.83
   3   9   9   15.78    5.06
   2  14   1   85.32   15.03
   2 -14   1   56.58   23.43
   2 -13   5   26.87   12.07
   2  13   5   27.97    9.52
   2   0  14 1461.97   53.09
   0  12   9   75.72   24.24
   0 -12   9   62.95   11.70
   6   6  -1  640.33   19.99
   6  -6  -1  692.39   26.32
   6  -6  -3   -4.79    7.50
   6   6  -3   17.23    9.00
   6   2   4  725.74   21.10
   6  -2   4  717.68   27.26
   2 -10 -11  772.25   65.60
   2  10 -11  746.14   26.50
   0 -14   5 1863.29   55.79
   0  14   5 1745.67   75.93
   4 -11   3   84.88   14.28
   4  11   3   67.26   12.04
   3   9 -11  556.01   34.73
   3  -9 -11  607.98   63.82
   2   3 -15   59.00   11.89
   2  -3 -15   55.87   12.19
   6  -2  -8  131.08   12.56
   6   2  -8  147.28   22.61
   5  -9   2 1126.78   47.10
   5   9   2 1143.58   44.75
   2   1  14  637.48   31.24
   2  -1  14  610.91   19.70
   5   8   4    3.68    5.80
   5  -8   4    5.86    4.60
   1   5  14 1242.14   73.60
   1  -5  14 1202.66   61.18
   1  -4 -15   36.47    9.14
   1   4 -15    9.69    8.27
   2   9 -12  978.04   45.80
   2  -9 -12  935.07   53.77
   3  10   8  561.77   25.92
   3 -10   8  522.08   41.33
   0   8  13   -0.87    4.53
   0  -8  13   13.57    7.46
   5   5   7 3320.06   79.71
   5  -5   7 3189.06   73.80
   3 -10 -10  745.78   48.63
   3  10 -10  681.90   42.69
   2  -6 -14   96.26   21.37
   2   6 -14  119.50   13.15
   6  -4   3  439.85   43.03
   6   4   3  408.53   25.97
   3  -8  10   84.60   12.57
   3   8  10   41.56   12.03
   4   0  11   -5.20    6.52
   1  14  -5   11.15    8.22
   1 -14  -5   -0.73   11.83
   2 -14  -3 1029.82   46.99
   2  14  -3 1038.89   44.05
   6  -4  -7  171.12   24.16
   6   4  -7  209.76   37.31
   5   3   8  771.86   30.49
   5  -3   8  738.72   21.99
   6   5   2 1958.06   57.93
   6  -5   2 1930.45   59.97
   6   6   0  211.89   32.55
   6  -6   0  204.43   20.38
   3   8 -12 2430.99   84.04
   3  -8 -12 2469.54   82.31
   6   6  -4  884.00   21.19
   6  -6  -4  841.91   32.64
   2 -11 -10  833.42   47.75
   2  11 -10  788.80   36.30
   6   5  -6 1207.96   47.81
   6  -5  -6 1222.50   51.22
   4   1  11   11.15    7.09
   4  -1  11    8.46    4.20
   4 -11  -6 2916.70   81.59
   4  11  -6 2929.07   70.43
   4 -10  -8   30.87   11.03
   4  10  -8   45.94   12.31
   1   0  15  664.70   22.27
   4  -6 -12  168.41   15.66
   4   6 -12  163.70   51.04
   3 -12   5   24.88    8.99
   3  12   5   19.12    8.27
   3  13   2    7.44    4.95
   3 -13   2   -4.33    6.84
   2  14   2 5569.60  130.85
   2 -14   2 5672.17  136.11
   2  -2  14   11.49   15.92
   2   2  14   16.29    5.06
   3  13  -4   35.30    7.83
   3 -13  -4   44.04   18.91
   3 -12  -7  150.60   32.75
   3  12  -7  188.12   27.47
   4   4 -13   66.97   18.37
   4  -4 -13   75.39   13.22
   1  -1  15 3391.03   94.54
   1   1  15 3333.12   71.90
   5  -4 -11   24.89    7.18
   5   4 -11   49.20   17.39
   1  10  11  199.19   32.06
   1 -10  11  284.69   25.26
   1 -13   7  501.16   16.06
   1  13   7  566.78   57.07
   0  -4  15  279.97   34.20
   0   4  15  258.80   17.20
   6  -3   4  160.32   19.64
   6   3   4  139.59   15.37
   4  -5  10  251.40   27.11
   4   5  10  242.75   19.53
   6   3  -8  528.81   40.02
   6  -3  -8  514.13   55.09
   1 -11  10  162.34   15.64
   1  11  10  148.31   32.56
   5   9  -6  114.81   15.55
   5  -9  -6  119.85   15.19
   4  12  -1   18.38    7.85
   4 -12  -1   13.57   11.48
   0 -15   0   17.92   15.50
   0  15   0   45.05   20.53
   2  -8 -13  389.51   42.73
   2   8 -13  347.87   23.66
   4  -2  11  173.70   22.36
   4   2  11  173.34   21.11
   4  -8   8  169.99   25.47
   4   8   8  216.60   30.08
   2  10  10   28.38    8.58
   2 -10  10   40.08   11.33
   4 -12  -2  181.50   23.78
   4  12  -2  134.81   25.65
   5   7  -9 2052.31   66.07
   5  -7  -9 1988.35   72.33
   3 -11   7   20.48    8.63
   3  11   7   49.59   11.24
   5   0 -12   12.97   10.57
   4   9   7 1309.37   60.70
   4  -9   7 1294.23   46.92
   3 -11  -9 4256.20  131.28
   3  11  -9 3995.57   94.06
   0  15   1  462.82   42.88
   0 -15   1  426.00   55.00
   6   6   1   21.61    5.99
   6  -6   1    6.55    5.42
   1  -2  15   50.90   12.72
   1   2  15   39.69   11.61
   3   0  13 2999.04   65.50
   2  -4 -15   12.80   14.94
   2   4 -15   17.64    9.63
   2 -13  -7 2770.59  113.51
   2  13  -7 2762.80   69.66
   3   5  12 2591.87   69.32
   3  -5  12 2469.95   52.25
   6  -6  -5  340.30   39.83
   6   6  -5  340.12   18.75
   4  12   0  379.14   41.85
   4 -12   0  350.93   36.63
   5   1 -12   16.50    9.52
   5  -1 -12   15.02   13.11
   5  10  -2   10.73    7.41
   5 -10  -2   20.11    7.02
   2  14  -4    1.92    6.65
   2 -14  -4   -1.01   19.15
   1  -9  12   25.09   13.02
   1   9  12   29.55    8.92
   5 -10  -1  364.69   34.61
   5  10  -1  425.86   46.88
   1  -7 -14  535.26   38.95
   1   7 -14  441.98   22.51
   2   9  11  512.73   24.24
   2  -9  11  411.76   16.52
   5  -6 -10  693.79   26.86
   5   6 -10  679.92   62.04
   6   0   5    4.37    4.88
   3   0 -15  409.90   57.37
   3   5 -14 1284.22   84.04
   3  -5 -14 1371.99   69.14
   1 -14   5  286.57   29.78
   1  14   5  326.88   32.95
   3   7  11 1034.61   47.27
   3  -7  11 1093.34   46.83
   5   9   3 1609.02   64.04
   5  -9   3 1627.08   89.13
   3   1  13   12.06    4.36
   3  -1  13   24.96    5.27
   2 -11   9  140.86   13.30
   2  11   9  145.18   26.38
   4  12  -3  161.97   14.53
   4 -12  -3  222.41   31.28
   6   0  -9   -0.09    6.00
   5  -8  -8   48.49   12.49
   5   8  -8   42.11   11.51
   2  -3  14    8.54    7.99
   2   3  14   15.33    6.01
   3   7 -13 1331.19   59.41
   3  -7 -13 1352.06   56.57
   6   1   5   43.90    7.38
   6  -1   5   38.83    9.63
   3  -1 -15 3759.31  100.86
   3   1 -15 3681.72  111.09
   4 -11   4   16.01    4.52
   4  11   4   43.81   10.69
   5  10  -3  364.87   37.50
   5 -10  -3  393.35   45.08
   0 -13   8 1819.90   51.16
   0  13   8 1896.63   72.87
   4  -7   9 1363.71   47.96
   4   7   9 1331.42   61.29
   5   4   8   35.50   12.64
   5  -4   8   34.42    7.88
   1 -13  -8  337.66   33.11
   1  13  -8  434.75   51.33
   2  12  -9  173.48   25.35
   2 -12  -9   88.63   39.83
   2  14   3  643.75   25.27
   2 -14   3  808.43   52.83
   6   1  -9  527.04   25.80
   6  -1  -9  501.41   44.57
   2   6  13 1223.76   61.39
   2  -6  13 1254.52   52.12
   0 -15   2   39.14   11.86
   0  15   2   21.71   14.50
   5  10   0 1486.50   55.95
   5 -10   0 1370.03   59.20
   1  -5 -15 1110.74   58.43
   1   5 -15  957.61   29.24
   3  13   3 2011.20   60.07
   3 -13   3 2077.55   85.76
   0 -14   6   37.08   14.05
   0  14   6   38.78   12.32
   3  13  -5  897.57   32.56
   3 -13  -5  907.33   41.13
   5   7   6  255.90   33.03
   5  -7   6  244.20   29.46
   5  -2 -12 3867.62  100.23
   5   2 -12 3946.26   92.13
   1  12   9  690.30   29.49
   1 -12   9  642.05   18.65
   4   0 -14 2853.98   89.79
   4 -12   1   29.60   13.13
   4  12   1   45.72   14.53
   6   5   3  419.57   35.45
   6  -5   3  417.84   28.69
   4  -3  11 1436.45   51.34
   4   3  11 1509.19   45.19
   1 -15   0   27.69   11.60
   1  15   0   18.68   10.51
   0  -7  14 2502.31   85.92
   0   7  14 2507.53   58.67
   2 -13   6   13.75    6.12
   2  13   6   31.31    8.26
   6   5  -7    7.99    9.18
   6  -5  -7    9.83    7.89
   3  -2  13  220.01   18.66
   3   2  13  235.91   26.22
   4  10   6 1989.00   79.42
   4 -10   6 1909.34   65.93
   1  15  -1  293.24   27.24
   1 -15  -1  270.32   25.14
   4  -1 -14  445.08   39.40
   4   1 -14  449.85   44.77
   1  14  -6   71.09   28.45
   1 -14  -6   72.58   22.26
   1  -6  14 2491.95   86.41
   1   6  14 2334.44   86.93
   1  10 -12 1532.34   50.62
   1 -10 -12 1581.31   52.41
   6   2   5 3236.12   73.48
   6  -2   5 3287.99   72.67
   6  -4   4   21.82   13.29
   6   4   4    6.43    7.09
   6  -7  -2 1985.67   66.56
   6   7  -2 1937.25   63.12
   3   2 -15  281.00   24.66
   3  -2 -15  330.99   28.83
   5   0   9  436.97   28.29
   5  -8   5 4834.12  110.59
   5   8   5 4831.05  100.62
   1  -3  15 4101.30  120.15
   1   3  15 4051.44  102.12
   1  11 -11 1597.34   61.17
   1 -11 -11 1512.31   65.34
   5  -6   7  684.39   28.71
   5   6   7  792.39   63.76
   5 -10  -4  576.24   62.79
   5  10  -4  609.20   18.13
   4  12  -4  625.32   17.06
   4 -12  -4  610.03   40.59
   6  -4  -8  917.43   38.15
   6   4  -8  989.71   51.76
   4  -8 -11  308.56   29.48
   4   8 -11  349.40   42.49
   4  -9 -10 1252.17   46.40
   4   9 -10 1292.47   58.36
   6  -2  -9 1389.68   48.57
   6   2  -9 1413.42   50.00
   1 -15   1   14.47   20.14
   1  15   1   12.05   10.23
   4 -11  -7  146.03   21.96
   4  11  -7  115.17   12.44
   6  -7  -1    5.04    4.29
   6   7  -1    7.09    3.72
   6  -7  -3  331.17   19.66
   6   7  -3  364.23   25.09
   1   0 -16    1.52    7.24
   4   5 -13   18.22   10.27
   4  -5 -13   23.47    9.67
   5  -1   9  334.95   20.64
   5   1   9  322.64   21.48
   5   5 -11  632.73   41.43
   5  -5 -11  589.17   34.60
   2   8  12    0.00    1.94
   2  -8  12    2.16    2.84
   6  -6   2   14.67    7.99
   6   6   2   30.07    8.97
   1  15  -2  101.75   15.66
   1 -15  -2  136.91   19.03
   0 -11  11   11.15    4.80
   0  11  11   26.66   11.14
   5  10   1   36.22    9.14
   5 -10   1   27.35   15.14
   6   6  -6  254.27   32.10
   6  -6  -6  263.69   33.91
   0   5  15   10.60    4.26
   0  -5  15   12.79   11.06
   1  -1 -16   -3.88    9.55
   1   1 -16   -1.19    9.46
   0  10  12  103.38   23.38
   0 -10  12   58.17   19.21
   1  -8  13   51.05   10.75
   1   8  13   36.36    4.46
   0 -15   3   72.85   15.58
   0  15   3   41.65   18.48
   2  12   8 2566.00   87.90
   2 -12   8 2436.11   59.47
   4  -2 -14  991.63   47.73
   4   2 -14  917.50   42.71
   2 -14  -5   42.62   15.12
   2  14  -5   25.88    8.10
   2   7 -14  609.55   29.22
   2  -7 -14  708.47   42.85
   5  -9  -7  980.24   33.77
   5   9  -7 1206.94   56.38
   1   9 -13 1887.10   51.83
   1  -9 -13 1852.25   60.27
   5  -3 -12   33.93    8.95
   5   3 -12   18.44   10.83
   6  -7   0  373.03   17.72
   6   7   0  334.29   18.51
   3  12   6   50.39    8.47
   3 -12   6   49.56   10.28
   6   7  -4 2551.16   70.48
   6  -7  -4 2556.24   79.74
   2  -4  14 1121.66   51.63
   2   4  14 1144.76   45.84
   3  12  -8   22.57    9.46
   3 -12  -8   23.74   14.80
   4  12   2 1301.51   97.45
   4 -12   2 1315.86   60.01
   1 -15   2   19.31   10.76
   1  15   2    6.10    7.28
   5  -2   9  593.35   28.08
   5   2   9  540.25   36.44
   4  -6  10 2430.29   57.24
   4   6  10 2424.18   93.31
   3  -3  13  616.87   12.59
   3   3  13  657.73   27.58
   2   5 -15   14.51    6.29
   2  -5 -15   34.28   18.91
   4   7 -12   81.56   18.75
   4  -7 -12   57.88   14.65
   4  10  -9  453.44   50.73
   4 -10  -9  444.74   30.67
   1 -12 -10  267.41   23.26
   1  12 -10  304.40   31.81
   6  -3   5   35.64    7.92
   6   3   5   34.48    6.90
   3   3 -15 2835.99   70.41
   3  -3 -15 2910.91   82.42
   1  -2 -16   38.51   10.50
   1   2 -16   55.34   11.46
   2 -14   4 1406.28   51.95
   2  14   4 1301.24   58.46
   0  12  10   68.74   18.60
   0 -12  10   60.09   10.35
   6   3  -9   19.79    7.16
   6  -3  -9   48.72    6.35
   0   0  16 1077.63   44.23
   1  15  -3   19.16    8.31
   1 -15  -3    9.17   15.06
   5 -10  -5 2095.93   83.51
   5  10  -5 1914.11   64.79
   5   9   4  382.00   26.33
   5  -9   4  279.81   13.90
   4   4  11 2069.36   71.59
   4  -4  11 2056.61   62.25
   0   9  13  188.24   19.98
   0  -9  13  241.37   31.93
   5   5   8  155.78   16.39
   5  -5   8   96.48   13.19
   3  -6  12 3186.15   75.31
   3   6  12 3270.13  112.87
   4 -12  -5  386.95   30.70
   4  12  -5  384.56   22.93
   3 -13   4    9.08   10.57
   3  13   4    3.98    4.47
   0   1  16 4962.19  115.28
   0  -1  16 4941.47  113.67
   3  10   9  391.34   35.12
   3 -10   9  465.55   28.53
   3  13  -6  320.06   20.11
   3 -13  -6  333.67   41.72
   2   0 -16  231.55   21.94
   3  -6 -14  132.37   29.97
   3   6 -14  215.82   21.09
   1  14   6  724.79   33.25
   1 -14   6  700.29   34.87
   3  -9  10  543.16   26.60
   3   9  10  609.17   33.92
   3 -10 -11  145.62   23.47
   3  10 -11  145.22   24.64
   1 -13   8 1715.13   47.21
   1  13   8 1658.18   61.79
   1  -4  15  184.86   25.70
   1   4  15  187.49   30.57
   4   3 -14  422.67   48.32
   4  -3 -14  390.90   37.11
   3   9 -12   35.63   14.38
   3  -9 -12   40.49   13.44
   5 -10   2   16.98    7.25
   5  10   2   35.53   12.35
   4 -11   5  377.16   11.06
   4  11   5  341.69   29.71
   2  -1 -16   38.79   10.86
   2   1 -16   29.35   10.15
   2 -13  -8 1446.80   73.72
   2  13  -8 1463.20   69.28
   2  10 -12 1548.59   60.01
   2 -10 -12 1639.96   57.13
   6   7   1    5.61    5.14
   6  -7   1   18.62    5.05
   6   7  -5   38.83   10.50
   6  -7  -5   44.02    5.64
   0 -15   4  878.16   37.85
   0  15   4  822.53   42.87
   5   7 -10 1034.57   60.79
   5  -7 -10  968.07   47.19
   6   5   4  448.80   33.69
   6  -5   4  432.33   29.71
   1  -6 -15   51.67   19.39
   1   6 -15   12.86    4.48
   2  11 -11  630.39   30.78
   2 -11 -11  732.65   50.55
   5  -3   9  159.15   23.76
   5   3   9  156.88   26.39
   1  15   3   56.75   18.57
   1 -15   3   53.13   10.88
   5   8  -9 3136.81   83.37
   5  -8  -9 2977.41   76.91
   6   5  -8  762.46   26.50
   6  -5  -8  728.00   17.41
   0  -2  16 1398.12   71.85
   0   2  16 1458.97   61.22
   6   0   6 1082.31   72.84
   6   6   3  323.75   24.12
   6  -6   3  346.16   27.61
   1  -3 -16   10.60    7.67
   1   3 -16    9.81    8.93
   3  11   8  214.53   30.86
   3 -11   8  212.56   30.05
   0 -14   7  630.03   25.40
   0  14   7  621.49   47.30
   6  -6  -7  862.92   26.93
   6   6  -7  820.36   27.08
   3  14  -1  144.05   16.00
   3 -14  -1  132.68   19.64
   5   4 -12  216.14   24.05
   5  -4 -12  252.89   24.39
   6   0 -10  576.09   34.17
   3  11 -10  163.23   33.32
   3 -11 -10  215.02   34.03
   2  -7  13   48.27   10.78
   2   7  13   36.15   14.60
   6   1   6   29.69    7.25
   6  -1   6   27.20    9.98
   2  -2 -16  379.57   39.42
   2   2 -16  358.99   24.80
   1   8 -14   93.06   10.45
   1  -8 -14  111.43   19.76
   2  -9 -13 1134.37   62.62
   2   9 -13 1176.94   49.82
   4  12   3  525.72   39.65
   4 -12   3  540.00   25.34
   4   9   8  746.47   32.30
   4  -9   8  813.15   27.80
   1  14  -7   35.13   15.87
   1 -14  -7   36.96   13.09
   3   8  11  172.82   23.29
   3  -8  11  154.79   24.14
   3   4  13  516.74   27.54
   3  -4  13  493.94   23.57
   3 -14   0   16.04    5.25
   3  14   0   14.27   11.52
   3  14  -2  496.10   21.69
   3 -14  -2  581.21   41.62
   1 -15  -4  216.65   24.77
   1  15  -4  205.61   33.31
   6   1 -10 1847.45   56.45
   6  -1 -10 1741.47   58.79
   2  14  -6  186.34   22.10
   2 -14  -6  169.54   23.29
   3  -8 -13  111.41   22.71
   3   8 -13   89.82   16.29
   6  -4   5  335.94   22.29
   6   4   5  340.83   22.24
   3  -4 -15   46.06   12.74
   3   4 -15   60.31   12.76
   4   6 -13   78.75   22.30
   4  -6 -13   60.46   12.27
   4 -11  -8  228.87   38.42
   4  11  -8  153.35   19.73
   4  -8   9 1164.09   43.30
   4   8   9 1149.91   51.87
   5   6 -11 3798.92  130.10
   5  -6 -11 3644.75   83.54
   2 -13   7   33.44    6.26
   2  13   7   47.97   13.43
   1  13  -9  719.45   58.42
   1 -13  -9  669.30   55.69
   6   4  -9   38.18   15.20
   6  -4  -9   24.23    5.91
   2  -5  14   21.24    8.21
   2   5  14   23.68   14.94
   1  -7  14   40.67   14.97
   1   7  14   20.64   12.36
   0  13   9   10.76   15.73
   0 -13   9   29.36    6.70
   5 -10  -6   11.53    6.26
   5  10  -6   19.37    7.16
   0   6  15   26.38    8.52
   0  -6  15   70.19   22.84
   5  -8   6  351.85   29.81
   5   8   6  370.36   19.44
   5  -7   7  845.33   38.35
   5   7   7  865.45   52.89
   1  11  11  319.30   30.76
   1 -11  11  347.54   22.16
   5  -9  -8   93.89   12.02
   5   9  -8  133.59   20.12
   6   2   6 1483.61   53.57
   6  -2   6 1466.62   67.70
   4   0  12 1333.47   57.28
   4  10   7   41.93   12.82
   4 -10   7   61.06   11.00
   2  12 -10 1312.39   57.96
   2 -12 -10 1419.05   78.80
   3 -14   1  535.52   27.64
   3  14   1  578.57   18.19
   4 -12  -6  774.97   49.54
   4  12  -6  758.61   22.75
   0  -8  14   73.21   13.88
   0   8  14   45.21    7.50
   3 -14  -3  114.60   22.24
   3  14  -3  123.35   13.30
   2 -15  -1   26.18    9.38
   2  15  -1   46.56    9.62
   6  -2 -10    9.52    5.84
   6   2 -10   13.12    6.30
   1 -10  12  188.02   19.78
   1  10  12  206.33   23.36
   5   0 -13 8138.23  230.68
   4   4 -14  225.86   28.54
   4  -4 -14  214.02   23.43
   6  -7   2  250.29   17.00
   6   7   2  257.75   27.55
   2 -15   0  839.17   51.93
   2  15   0  754.17   28.66
   0  -3  16  478.65   56.90
   0   3  16  498.62   27.12
   4   1  12  959.58   26.89
   4  -1  12  968.92   26.77
   2  14   5  408.96   40.60
   2 -14   5  383.79   36.47
   2 -10  11  511.58   13.16
   2  10  11  548.23   48.14
   6  -7  -6 1574.72   41.98
   6   7  -6 1594.37   61.28
   6   8  -2   66.29    9.87
   6  -8  -2   95.79   12.73
   4   5  11  921.75   37.57
   4  -5  11  911.29   21.95
   2 -11  10  303.44   14.13
   2  11  10  282.92   31.39
   5 -10   3 1042.99   72.06
   5  10   3  998.50   44.23
   2   6 -15   11.63    5.71
   2  -6 -15   24.50   17.37
   5   1 -13   33.92   11.18
   5  -1 -13   19.84   16.54
   2  -3 -16  486.22   32.95
   2   3 -16  473.06   24.50
   2   0  15   11.01    9.51
   6   8  -1  528.71   21.29
   6  -8  -1  533.67   18.41
   2  15  -2  218.48   23.17
   2 -15  -2  260.69   26.41
   6  -8  -3   43.20    7.83
   6   8  -3   39.48    6.01
   5   4   9 1186.43   54.40
   5  -4   9 1152.27   43.98
   1   5  15 1560.08   81.70
   1  -5  15 1601.08   71.68
   1  15   4 1299.37   65.50
   1 -15   4 1291.18   49.21
   5 -11  -2  190.53   29.59
   5  11  -2  156.75   31.82
   3  13   5   41.43    8.33
   3 -13   5   27.69    9.69
   1 -12  10   22.26    6.83
   1  12  10   68.68   20.47
   2  15   1   30.40   12.06
   2 -15   1   51.26   12.40
   5 -11  -1    1.19   12.09
   5  11  -1    2.81    7.34
   7   0  -2    3.62    2.22
   2   1  15   19.05    9.35
   2  -1  15    1.79    2.87
   3 -13  -7 1610.92   74.18
   3  13  -7 1506.55   51.14
   1   4 -16 1697.29   55.34
   1  -4 -16 1734.23   66.03
   0  15   5  164.62   25.68
   0 -15   5  187.51   21.70
   7   0  -3 2529.35   84.34
   5   9   5   10.80    4.05
   5  -9   5    2.11    3.54
   4   7  10  182.47   26.23
   4  -7  10  137.48   39.40
   5   6   8  623.94   23.86
   5  -6   8  512.32   33.28
   3  12   7  654.17   74.71
   3 -12   7  739.04   33.76
   4  -9 -11  288.75   30.35
   4   9 -11  236.04   45.14
   2  -8 -14   50.70   12.45
   2   8 -14   21.77    7.89
   4   2  12 2085.09   85.74
   4  -2  12 2060.89   73.09
   7   1  -2    5.53    2.73
   7  -1  -2    3.76    7.09
   3  12  -9  397.76   41.32
   3 -12  -9  425.61   42.78
   5 -11  -3   92.39   17.61
   5  11  -3   76.50   12.29
   7  -1  -3   68.93    8.92
   7   1  -3   89.66   24.29
   7   0  -1   45.87    8.22
   2  -9  12  832.52   14.96
   2   9  12  901.82   39.98
   5  -2 -13  169.88   23.44
   5   2 -13  193.21   28.25
   6  -8   0  161.40   15.45
   6   8   0  175.87   27.23
   3  14   2 2681.73   72.48
   3 -14   2 2566.60  110.99
   6  -3   6  161.76   19.59
   6   3   6  169.31   21.88
   6   8  -4  308.29   21.15
   6  -8  -4  287.12   21.32
   3 -14  -4  405.20   53.33
   3  14  -4  361.66   23.57
   5  11   0   52.43   10.75
   5 -11   0   33.36   12.19
   4  13  -1  117.55   21.76
   4 -13  -1  123.52   23.55
   1  15  -5 1860.43   82.19
   1 -15  -5 1731.49   73.88
   1  -9  13    6.49    5.42
   1   9  13    4.79    4.19
   2 -15  -3   40.77   14.02
   2  15  -3   41.87   10.10
   7  -1  -1   18.67    5.69
   7   1  -1    1.81    3.58
   4  13  -2  212.49   28.67
   4 -13  -2  225.40   37.92
   7   0  -4    3.74   15.19
   4   8 -12 1936.31   72.58
   4  -8 -12 1882.30   60.85
   3   7  12  188.03   24.26
   3  -7  12  104.34   10.41
   2  12   9  814.93   33.29
   2 -12   9  754.09   30.39
   5   5 -12  296.01   45.48
   5  -5 -12  285.68   21.97
   6   3 -10  864.66   41.11
   6  -3 -10  827.22   15.86
   4 -10 -10  741.06   37.38
   4  10 -10  763.14   37.56
   1  14   7   79.40   18.95
   1 -14   7  103.66   17.93
   2   2  15   45.17    9.79
   2  -2  15   39.82   13.30
   6  -6   4  118.41   18.53
   6   6   4  127.74   14.59
   4 -12   4   10.74    4.23
   4  12   4   22.76   10.91
   3   7 -14   97.96   14.79
   3  -7 -14   64.82   13.11
   3   5  13   92.61   18.94
   3  -5  13   98.63   34.40
   4  11   6    0.99    6.72
   4 -11   6    2.99    3.91
   7  -1  -4  525.87   20.20
   7   1  -4  647.45   80.89
   4  13   0  123.85   20.79
   4 -13   0  137.50   17.28
   1   0  16    2.58    6.37
   6   6  -8 3193.53   94.30
   6  -6  -8 3185.27   68.12
   5   0  10    8.59    9.16
   2  15   2  530.61   26.74
   2 -15   2  584.99   35.61
   7  -2  -2   30.80    7.10
   7   2  -2   38.78   10.90
   1 -11 -12   32.70    9.71
   1  11 -12   21.00    9.43
   6  -5   5  204.39   23.22
   6   5   5  191.60   22.15
   3   5 -15  557.36   30.78
   3  -5 -15  706.27   49.82
   7  -2  -3  629.77   23.43
   7   2  -3  604.11   36.44
   4  13  -3   61.45    7.41
   4 -13  -3   74.55   29.85
   5  11  -4  609.98   15.46
   5 -11  -4  617.61   57.71
   1   1  16    3.46    3.59
   1  -1  16    2.79    2.42
   6  -5  -9  146.39   18.41
   6   5  -9  165.37   26.28
   7   0   0   13.39    5.04
   0  -4  16  459.00   44.72
   0   4  16  491.47   16.91
   5  -1  10  194.51   22.68
   5   1  10  160.53   20.43
   5 -10  -7  768.21   34.24
   5  10  -7  803.91   46.58
   1   7 -15  477.06   34.89
   1  -7 -15  603.45   42.09
   3   0  14    1.39    5.55
   7   2  -1  203.34   19.64
   7  -2  -1  235.47   17.44
   2  14  -7  652.38   46.80
   2 -14  -7  757.91   38.52
   1  10 -13   39.60   15.74
   1 -10 -13   55.93   15.62
   2  13  -9  660.17   74.49
   2 -13  -9  520.19   77.33
   7   1   0    6.83    3.74
   7  -1   0   18.31    5.91
   2  -4 -16  584.46   49.67
   2   4 -16  641.41   25.17
   4   3  12   24.37    9.93
   4  -3  12   35.67    7.18
   3   0 -16   -2.03   14.62
   5  11   1   57.21   12.93
   5 -11   1   79.50   18.22
   6  -7   3    3.71    3.71
   6   7   3   37.51    9.19
   4   0 -15   19.59   12.42
   0  11  12  365.24   33.93
   0 -11  12  332.92   24.96
   3  -1  14  104.19   19.93
   3   1  14  122.95   14.06
   6  -8   1   85.20    7.40
   6   8   1  114.08   14.82
   1  12 -11  163.42   24.71
   1 -12 -11  180.16   27.80
   6  -7  -7 1978.91   50.14
   6   7  -7 1978.14   65.67
   7  -2  -4    6.49    7.58
   7   2  -4   40.26   19.92
   7   0  -5   31.42   16.55
   6  -8  -5 1933.74   55.30
   6   8  -5 1900.30   67.59
   1  13   9   39.88   17.58
   1 -13   9   40.23    8.30
   5  -3 -13   74.26   13.80
   5   3 -13   69.00   15.43
   4   5 -14   30.65    9.49
   4  -5 -14   -0.35   18.12
   4  12  -7   23.85   10.99
   4 -12  -7   55.91   15.83
   2   6  14  357.69   31.87
   2  -6  14  353.19   36.71
   3  -1 -16   81.42   20.64
   3   1 -16   55.80   13.87
   4  13   1  198.80   24.90
   4 -13   1  211.27   27.33
   5  -8 -10 1399.46   49.87
   5   8 -10 1436.27   66.56
   4   1 -15   44.85   14.67
   4  -1 -15   36.46   12.78
   0  14   8  213.50   66.08
   0 -14   8  283.28   37.95
   7   1  -5  185.93   48.39
   7  -1  -5  144.55   19.11
   1  14  -8  230.41   32.33
   1 -14  -8  237.21   27.77
   1   2  16  494.66   37.08
   1  -2  16  433.63   33.08
   2  15  -4  725.88   33.55
   2 -15  -4  720.61   41.74
   5   2  10   14.48    7.38
   5  -2  10   13.23    7.41
   0 -12  11    6.70    9.73
   0  12  11   53.46   18.21
   5 -10   4  279.89   29.17
   5  10   4  262.47   31.30
   2  -3  15   38.89   13.67
   2   3  15   58.18   11.43
   0  16   0   76.10   29.15
   0 -16   0   58.59   20.87
   4   7 -13   17.52   24.50
   4  -7 -13   25.42   15.82
   5  -5   9  569.04   22.43
   5   5   9  490.03   33.89
   3 -14   3 2843.53   92.76
   3  14   3 2876.48   72.36
   0  10  13   26.60    7.17
   0 -10  13   13.26   10.74
   5   7 -11  275.74   49.15
   5  -7 -11  326.80   23.26
   1 -15   5  438.61   29.42
   1  15   5  375.25   40.87
   3 -14  -5  146.29   31.40
   3  14  -5  202.44   31.77
   6   0   7    6.12   14.36
   4 -11  -9   16.31   10.15
   4  11  -9   12.86    9.40
   4  13  -4    9.07    8.81
   4 -13  -4   27.16   13.09
   7  -2   0   22.14    6.57
   7   2   0   16.11    7.36
   2  -8  13  407.67   25.86
   2   8  13  450.47   29.82
   6  -4   6  217.13   25.15
   6   4   6  256.89   22.99
   7  -3  -2   13.48    5.20
   7   3  -2   21.54   12.09
   0  16   1  513.64   48.67
   0 -16   1  484.45   36.23
   0   7  15    5.77    2.86
   0  -7  15   12.45   20.46
   1  -5 -16   23.03   14.64
   1   5 -16   20.83    8.45
   3  10  10  257.77   22.67
   3 -10  10  251.80   27.89
   4   6  11   38.83    5.18
   4  -6  11   43.24   14.70
   3   2  14    7.86   10.41
   3  -2  14   -2.47    3.49
   7   3  -3   59.24   18.71
   7  -3  -3   41.95    8.08
   2 -14   6 1220.66   64.41
   2  14   6 1149.22   44.67
   6   0 -11    1.95    8.30
   5   9  -9   21.24    9.36
   5  -9  -9    5.11    6.79
   6  -1   7   47.40   14.59
   6   1   7   41.98    9.74
   6   4 -10  261.53   29.40
   6  -4 -10  250.07   18.74
   2  15   3  111.91   17.66
   2 -15   3   81.90   13.33
   3  10 -12   60.01   14.21
   3 -10 -12   35.78   13.25
   5 -11  -5   11.98    8.98
   5  11  -5   19.39    7.92
   7   0   1 1858.13   56.39
   3  -2 -16  326.19   37.93
   3   2 -16  250.05   24.78
   4  -2 -15  589.27   33.85
   4   2 -15  576.34   52.57
   1   6  15   16.76    8.65
   1  -6  15   23.69   11.90
   0  15   6   30.09   11.63
   0 -15   6   -4.90    6.27
   7  -3  -1   56.04    9.67
   7   3  -1   46.48    7.85
   6   1 -11   56.68   10.37
   6  -1 -11   47.47   10.36
   7   2  -5  322.75   25.14
   7  -2  -5  390.88   32.66
   2  13   8 1041.74   91.80
   2 -13   8  823.11   31.05
   3  11   9   13.61   12.66
   3 -11   9   17.20    6.72
   7   1   1  921.10   37.13
   7  -1   1  945.18   26.93
   1  -9 -14   78.52   28.61
   1   9 -14   67.37   10.51
   1  -8  14  204.76   26.40
   1   8  14  201.54   30.23
   3 -11 -11   77.97   23.14
   3  11 -11   90.61   18.62
   3  -9  11 1254.94   55.80
   3   9  11 1297.30   49.08
   2   7 -15  873.40   49.50
   2  -7 -15  984.56   66.86
   7   3  -4   17.57    9.52
   7  -3  -4   19.13    8.43
   5  -8   7  871.10   22.84
   5   8   7  823.90   13.00
   3 -13   6  227.10   34.09
   3  13   6  243.01   28.65
   5 -11   2  235.46   24.58
   5  11   2  266.46   25.82
   0  16   2   30.73   14.91
   0 -16   2   24.38   15.04
   1  15  -6   30.16   22.75
   1 -15  -6   25.44   15.63
   3   9 -13 1823.61   90.48
   3  -9 -13 1946.28   75.07
   3 -13  -8  505.76   43.01
   3  13  -8  403.01   38.31
   4  13   2   53.44   21.43
   4 -13   2   40.63   19.90
   2  11 -12 1165.34   62.55
   2 -11 -12 1231.21   65.65
   4  -9   9 1954.65   60.53
   4   9   9 2034.01   64.74
   7   0  -6   11.85   11.54
   6   2   7   18.86    7.59
   6  -2   7   27.02    9.82
   1 -13 -10   34.43   16.31
   1  13 -10   44.93   17.25
   1  -3  16  271.12   32.80
   1   3  16  262.48   32.20
   6   8   2   14.35    7.70
   6  -8   2   10.97    3.33
   5   3  10  201.13   23.64
   5  -3  10  165.25   18.75
   4  -4  12 3446.00   95.87
   4   4  12 3582.35   92.99
   6   8  -6  238.27   32.73
   6  -8  -6  331.81   16.63
   2  10 -13 2889.33   72.85
   2 -10 -13 2801.42   81.09
   4  10   8  442.67   26.98
   4 -10   8  483.85   35.13
   1  16   0  357.19   22.19
   1 -16   0  364.63   39.02
   6  -2 -11   92.31   15.06
   6   2 -11  102.52   19.40
   7   1  -6  429.83   51.74
   7  -1  -6  357.02   46.77
   5   7   8  858.49   26.63
   5  -7   8  835.38   20.82
   5  -9   6   11.51    5.52
   5   9   6   31.32    5.33
   0  13  10  162.29   26.43
   0 -13  10  189.17   26.12
   1 -16  -1  130.69   20.67
   1  16  -1  123.70   20.40
   5  -6 -12 1832.55   59.71
   5   6 -12 1816.63   70.16
   5  -4 -13  377.96   35.18
   5   4 -13  407.70   45.46
   7  -3   0   14.78    9.48
   7   3   0    7.06    6.37
   0  -5  16 1356.31   66.66
   0   5  16 1270.11   61.02
   4 -12   5  202.50   25.34
   4  12   5  223.84   38.32
   7  -2   1  896.85   20.77
   7   2   1  915.66   25.09
   1   0 -17  157.46   25.19
   3   3  14  210.41   20.98
   3  -3  14  186.19   35.17
   0  -9  14   41.00   16.33
   0   9  14   35.68    6.70
   3   6  13   29.07    6.50
   3  -6  13    6.45    6.21
   4  13  -5   62.03   11.28
   4 -13  -5  110.80   21.70
   2 -15  -5  241.05   47.11
   2  15  -5  266.81   27.75
   1  16   1  907.58   33.26
   1 -16   1  920.43   43.65
   2  -5 -16   51.02   17.51
   2   5 -16   64.81   11.17
   3   3 -16    5.18    7.11
   3  -3 -16   28.54   12.35
   2  -4  15   12.51   10.48
   2   4  15   19.75    7.45
   1   1 -17  215.44   28.29
   1  -1 -17  223.78   34.71
   6   6   5  185.56   17.46
   6  -6   5  157.58   23.85
   4  -3 -15  159.41   25.64
   4   3 -15  194.13   35.09
   6  -9  -2 1982.26   71.20
   6   9  -2 1865.29   81.00
   3   6 -15   47.86    9.66
   3  -6 -15   46.09   29.88
   2  12 -11   75.41   17.35
   2 -12 -11  141.03   35.60
   4  -8  10 1166.64   66.71
   4   8  10 1220.60   63.93
   7  -3  -5 1612.05   51.59
   7   3  -5 1582.84   56.31
   6  -6  -9   13.09    5.25
   6   6  -9   33.25   10.68
   1  16  -2    5.44    9.44
   1 -16  -2    7.70   12.77
   5  10  -8   22.81    8.18
   5 -10  -8   30.41    9.30
   7  -4  -2 5810.10  131.56
   7   4  -2 5843.62  174.15
   6  -9  -1    7.37    5.97
   6   9  -1   13.17    6.87
   6   9  -3  276.61   16.68
   6  -9  -3  293.70   19.84
   6   7   4  130.00   18.93
   6  -7   4  145.99   16.93
   3  12   8   10.79    8.42
   3 -12   8   26.96    8.08
   7  -4  -3   12.87    9.28
   7   4  -3   47.92    9.15
   0  16   3   10.76   14.09
   0 -16   3   51.21   15.74
   7  -2  -6   13.99    7.72
   7   2  -6    5.23    4.28
   3  14   4   35.22   12.90
   3 -14   4   44.07   13.42
   6  -7  -8    4.90    5.12
   6   7  -8   13.53   10.74
   3  12 -10  220.41   34.49
   3 -12 -10  262.08   32.77
   3 -14  -6  180.62   25.83
   3  14  -6  189.83   20.80
   7   0   2   11.09    6.30
   5  11  -6 1650.65   49.94
   5 -11  -6 1581.23   59.43
   1  14   8  620.62   57.23
   1 -14   8  562.57   20.79
   2  15   4  139.92   16.07
   2 -15   4  155.90   24.47
   7   4  -1   12.96    3.79
   7  -4  -1   17.23    9.99
   3  -8  12  842.49   40.89
   3   8  12  844.78   27.17
   6   3   7   75.04   11.52
   6  -3   7   77.60   11.62
   4  -6 -14   51.75   17.65
   4   6 -14   58.16   18.04
   2  -9 -14 1681.13   59.07
   2   9 -14 1618.19   50.52
   6  -5   6 3315.37   77.39
   6   5   6 3139.21   83.48
   4  11   7   38.57   15.00
   4 -11   7   12.52    6.78
   7  -1   2  298.95   27.05
   7   1   2  315.76   29.82
   1  -2 -17    2.88    6.74
   1   2 -17   21.11    9.12
   3   8 -14 1111.84   54.77
   3  -8 -14 1189.39   61.79
   2 -14  -8  495.24   53.08
   2  14  -8  477.68   48.98
   1 -16   2  398.09   33.61
   1  16   2  389.81   33.82
   4  12  -8    8.50    5.75
   4 -12  -8    4.26   10.29
   6  -3 -11    7.34    7.90
   6   3 -11   40.41   10.14
   7   4  -4  700.80   58.59
   7  -4  -4  624.22   37.85
   6   5 -10 1175.64   52.32
   6  -5 -10 1140.52   38.13
   1  11  12   89.34   14.97
   1 -11  12   65.58    8.25
   6   9   0  316.46   24.86
   6  -9   0  291.26   24.72
   6   9  -4 1596.08   57.03
   6  -9  -4 1699.07   63.59
   7   3   1 1491.29   49.06
   7  -3   1 1451.62   52.53
   2  11  11   27.42   12.16
   2 -11  11    9.07    3.66
   1  15   6   28.48    8.63
   1 -15   6   34.56    9.33
   2   0 -17   14.11    7.73
   4  13   3  134.82   18.82
   4 -13   3  161.63   23.07
   5  -6   9 1914.41   60.24
   5   6   9 1959.43   62.81
   0   0  17    1.47    6.30
   5  10   5  655.61   25.96
   5 -10   5  663.75   21.99
   5 -11   3 1087.18   45.26
   5  11   3 1061.37   50.86
   4   9 -12 1879.10   74.96
   4  -9 -12 1796.26   66.58
   5   0 -14   13.23    9.57
   1  -4  16   75.38   17.52
   1   4  16  105.51   20.34
   4 -10 -11  184.23   26.76
   4  10 -11  167.67   33.72
   1  16  -3  248.19   31.18
   1 -16  -3  263.80   33.51
   1  12  11   15.86    6.83
   1 -12  11    7.00    6.41
   5   4  10  317.24   27.27
   5  -4  10  383.89   44.00
   2   7  14  198.46   25.24
   2  -7  14  208.98   26.52
   1   8 -15  289.43   27.19
   1  -8 -15  308.42   31.41
   1  -6 -16   77.02   17.63
   1   6 -16   80.05   12.22
   2  -1 -17  469.07   47.01
   2   1 -17  523.16   38.91
   7   0  -7  184.88   31.34
   0   1  17   96.48   15.43
   0  -1  17  103.36   22.84
   2 -10  12  426.34   18.85
   2  10  12  438.71   29.01
   5  -1 -14  300.14   31.25
   5   1 -14  271.84   30.81
   7   4   0   73.74   12.63
   7  -4   0   75.33   10.43
   7   2   2   23.35    8.70
   7  -2   2   42.00    9.15
   6   8   3  543.17   29.71
   6  -8   3  588.66   16.37
   7   1  -7    5.83    5.47
   7  -1  -7   16.11    9.88
   3   4  14   10.54   11.57
   3  -4  14   17.46   13.98
   2  12  10  774.69   24.65
   2 -12  10  784.25   26.34
   1 -10  13   13.38    5.64
   1  10  13   13.23    5.96
   6   8  -7  869.65   33.96
   6  -8  -7  841.19   26.89
   7  -3  -6   28.79   11.78
   7   3  -6   63.50   12.63
   4   5  12  218.53   31.52
   4  -5  12  220.84   30.27
   3   4 -16  435.12   45.75
   3  -4 -16  445.40   36.96
   2 -13 -10 3852.32  106.39
   2  13 -10 3948.81  104.86
   4   4 -15   15.68   15.17
   4  -4 -15   -2.86   12.38
   4   7  11    6.17   10.71
   4  -7  11   19.39    9.99
   4  13  -6  381.23   33.32
   4 -13  -6  437.27   36.89
   0  15   7  119.00   25.10
   0 -15   7   82.35   11.39
   4   0  13   -2.35    5.36
   2  14   7   35.98   10.19
   2 -14   7   34.60    9.75
   7  -4  -5   62.35   15.69
   7   4  -5   70.33   15.93
   3 -15  -1  197.35   36.60
   3  15  -1  177.83   26.61
   5 -12  -2  200.93   29.89
   5  12  -2  186.25   23.01
   1 -14  -9 1603.59   61.64
   1  14  -9 1608.25   69.75
   5   5 -13  430.70   56.05
   5  -5 -13  349.42   37.33
   5  12  -1 1598.58   50.78
   5 -12  -1 1647.26  156.56
   0 -16   4 1080.56   58.85
   0  16   4 1130.64   51.14
   0 -14   9    4.77    6.78
   0  14   9   17.28   18.64
   1  -3 -17 1299.85   49.63
   1   3 -17 1334.39   57.68
   4  -8 -13   15.89   13.47
   4   8 -13   25.76   13.11
   2   2 -17    6.75    8.78
   2  -2 -17    8.95    8.86
   0  -2  17   49.96    9.18
   0   2  17   62.45   10.69
   6  -9   1   14.98    7.14
   6   9   1   19.92    8.61
   1  15  -7 1029.17   58.57
   1 -15  -7 1035.53   54.23
   1  -7  15  379.66   49.12
   1   7  15  363.87   27.89
   5  -8 -11 2104.33   86.39
   5   8 -11 2184.34   95.60
   1 -16   3  966.23   29.28
   1  16   3  926.66   27.38
   4  -1  13   12.82    7.51
   4   1  13   14.16    4.63
   3 -15   0  227.55   29.35
   3  15   0  322.90   27.81
   3  15  -2  374.68   23.99
   3 -15  -2  367.95   38.36
   6  -9  -5   57.46   11.95
   6   9  -5   53.46    9.33
   5  -2 -14   51.28   10.99
   5   2 -14   81.63   15.44
   4 -11 -10 2988.76   86.74
   4  11 -10 2731.68   77.67
   2 -15  -6 2372.62  101.15
   2  15  -6 2369.27  114.80
   2   5  15    9.73    8.84
   2  -5  15    6.89    7.90
   5   9 -10 1288.01   59.74
   5  -9 -10 1320.78   45.51
   0   8  15    3.23    4.27
   0  -8  15   10.21   14.53
   5  12  -3   25.19    9.38
   5 -12  -3   29.08   18.08
   7  -2  -7  914.01   37.17
   7   2  -7  935.47   29.03
   6  -4   7  413.30   39.93
   6   4   7  437.80   26.26
   0   6  16   22.72   13.33
   0  -6  16   31.90   11.19
   1  13  10   13.77   13.64
   1 -13  10   23.89    6.84
   7  -5  -2  236.81   29.90
   7   5  -2  247.35   25.27
   5  12   0   75.71   11.85
   5 -12   0   70.34   18.73
   7   5  -3   37.78   10.87
   7  -5  -3   54.04   13.48
   6   4 -11  160.77   24.02
   6  -4 -11  164.41   18.39
   3  13   7  466.89   33.90
   3 -13   7  391.14   17.72
   1 -16  -4  194.92   23.21
   1  16  -4  126.78   31.02
   2   9  13   16.79    5.93
   2  -9  13    7.63    6.25
   7   0   3  273.71   23.53
   2  -6 -16   28.64   16.19
   2   6 -16   28.41    8.74
   7  -4   1  108.49   12.19
   7   4   1   90.18   21.39
   7   3   2   91.30   14.84
   7  -3   2   87.23   10.21
   3 -13  -9 2349.68   98.45
   3  13  -9 2169.61   79.46
   5  11  -7  139.10   20.54
   5 -11  -7  219.52   27.55
   6   0   8 1561.64   65.45
   3 -15   1  781.43   37.40
   3  15   1  879.38   36.16
   5   0  11 1335.39   48.31
   3  15  -3   26.17    6.50
   3 -15  -3   60.35   22.28
   7  -5  -1   21.38    6.49
   7   5  -1   11.48    4.31
   4  -2  13   13.26    6.02
   4   2  13    9.35    7.05
   2  -8 -15  621.92   40.27
   2   8 -15  550.68   38.23
   4  12   6  631.11   27.11
   4 -12   6  645.22   30.32
   1 -11 -13  855.79   34.98
   1  11 -13  868.79   40.93
   5  -7 -12   35.19   15.61
   5   7 -12   36.83   23.64
   3  14   5 1847.84   59.31
   3 -14   5 1858.27   57.95
   7   1   3  375.35   26.15
   7  -1   3  370.91   33.43
   2  15   5 1620.06   57.36
   2 -15   5 1650.07   59.74
   6   0 -12   73.27   15.10
   3 -14  -7   77.58   17.04
   3  14  -7   69.16   20.05
   1 -12 -12   44.59   11.06
   1  12 -12   51.36   14.45
   6   1   8    6.90    6.26
   6  -1   8   35.20   10.11
   5  -1  11  736.24   39.79
   5   1  11  772.89   26.95
   3   7  13   34.78    6.58
   3  -7  13   85.52   11.79
   7  -5  -4 1037.95   55.07
   7   5  -4 1009.26   37.47
   2  13   9   47.43   13.98
   2 -13   9   28.11   11.04
   5  12  -4  560.23   15.18
   5 -12  -4  599.52   54.34
   1  -9  14   88.05   23.65
   1   9  14   75.81   14.16
   6   1 -12 1532.17   55.63
   6  -1 -12 1551.94   59.24
   6   7   5  319.45   27.11
   6  -7   5  324.81   24.77
   3   7 -15  865.68   38.58
   3  -7 -15 1005.38   58.66
   4  13   4  400.29   44.00
   4 -13   4  380.19   29.64
   2   3 -17   11.02    7.18
   2  -3 -17   11.05   12.60
   0   3  17  121.89   17.47
   0  -3  17  143.08   20.72
   2 -16  -1  332.07   28.11
   2  16  -1  315.38   29.61
   7   4  -6  591.25   39.43
   7  -4  -6  663.00   34.02
   5   8   8   84.22   20.15
   5  -8   8   53.64   10.43
   5  10  -9 1396.83   58.55
   5 -10  -9 1363.78   48.82
   5  -9   7  117.23   16.58
   5   9   7  163.09   32.73
   5   3 -14   21.23   11.94
   5  -3 -14   19.94    7.84
   1   5  16  349.09   30.25
   1  -5  16  350.05   54.80
   2 -16   0  106.93   16.24
   2  16   0   77.88   12.43
   6  -7  -9  201.40   19.90
   6   7  -9  244.31   32.96
   2   0  16  167.95   21.39
   5  -5  10 1761.61   51.35
   5   5  10 1702.21   58.68
   6  -6   6  307.18   32.59
   6   6   6  388.22   28.28
   5 -11   4  801.31   48.22
   5  11   4  750.43   43.40
   5  12   1  163.68   28.96
   5 -12   1  150.82   21.16
   4  14  -1  153.19   28.06
   4 -14  -1  170.53   29.42
   0  12  12   61.89   16.46
   0 -12  12   47.10    9.09
   7  -3  -7  298.53   58.39
   7   3  -7  388.19   27.09
   0 -11  13   25.40    8.02
   0  11  13   16.28    8.09
   4  14  -2  298.41   37.73
   4 -14  -2  325.87   49.26
   6   6 -10  488.96   64.01
   6  -6 -10  449.25   22.32
   6   9   2 1594.34   62.71
   6  -9   2 1623.25   73.56
   7   5   0  318.45   25.82
   7  -5   0  356.53   26.93
   7   0  -8   -0.48    3.11
   7   2   3   39.98    8.12
   7  -2   3   60.70   19.68
   2   1  16  220.38   42.13
   2  -1  16  247.26   29.93
   1  10 -14 1086.13   57.63
   1 -10 -14 1088.38   60.81
   2 -16  -2   89.41   18.11
   2  16  -2  128.96   20.84
   1  -4 -17   41.43   37.31
   1   4 -17   50.25   12.97
   6   2   8  470.54   29.53
   6  -2   8  437.48   49.65
   6   9  -6  537.21   42.67
   6  -9  -6  522.91   21.02
   3  11  10   94.16   19.49
   3 -11  10  120.19   20.36
   3  -5  14  692.04   32.09
   3   5  14  579.27   26.87
   5   2  11  316.04   28.18
   5  -2  11  339.98   33.27
   3  10  11 2472.44   74.14
   3 -10  11 2481.59  106.12
   1 -16   4  361.03   34.88
   1  16   4  343.43   37.32
   4 -14   0  349.30   43.58
   4  14   0  401.07   50.44
   4  -7 -14  130.31   20.93
   4   7 -14  118.38   25.35
   3  11 -12   69.47   18.33
   3 -11 -12   57.45   16.52
   7  -1  -8  338.12   28.62
   7   1  -8  383.07   27.95
   3 -15   2  338.70   34.47
   3  15   2  364.30   29.78
   2 -16   1  158.47   28.28
   2  16   1  151.34   21.64
   3  -5 -16  899.00   54.51
   3   5 -16  820.01   47.81
   3 -15  -4  153.27   47.61
   3  15  -4  228.45   27.75
   3 -10 -13   63.64   13.99
   3  10 -13   76.62   19.45
   6   2 -12    5.82    7.18
   6  -2 -12   26.57    8.88
   4  -5 -15   47.23   10.50
   4   5 -15   12.48    8.92
   6  -8   4   28.68    8.18
   6   8   4   37.55   10.75
   0 -16   5  357.38   47.10
   0  16   5  371.50   35.73
   4  10   9   23.28    7.23
   4 -10   9    4.02    7.96
   1 -13 -11  459.53   40.20
   1  13 -11  420.06   50.00
   4   3  13  159.91   21.74
   4  -3  13  199.11   20.90
   7   5  -5  195.56   25.35
   7  -5  -5  190.45   29.75
   4 -12  -9 1555.82   80.19
   4  12  -9 1389.79   56.49
   4  14  -3  801.32   31.79
   4 -14  -3  728.66   37.06
   6   8  -8 1365.17   64.21
   6  -8  -8 1283.85   45.83
   1  15   7 2134.42   89.74
   1 -15   7 2090.63   98.22
   4  13  -7 1122.19   59.33
   4 -13  -7 1153.84   58.31
   5  -7   9   36.38    8.06
   5   7   9    4.02   14.84
   4   0 -16   73.35   16.80
   4   9  10   48.82   11.96
   4  -9  10   45.52   11.12
   5  10   6  517.30   34.26
   5 -10   6  356.59   23.66
   2 -14  -9  824.11   65.18
   2  14  -9  764.62   73.45
   2  -2  16  784.44   40.48
   2   2  16  785.14   36.51
   5  12  -5   50.28    9.24
   5 -12  -5   92.44   19.35
   4   6  12  966.02   39.71
   4  -6  12 1030.37   59.53
   7  -4   2 1295.12   49.42
   7   4   2 1257.77   53.46
   0  13  11   24.87   15.49
   0 -13  11    6.96    5.93
   1  -7 -16   35.62   20.25
   1   7 -16   18.47   10.78
   0  10  14   13.18    6.97
   0 -10  14   27.41   12.83
   4   1 -16  310.90   45.81
   4  -1 -16  344.48   58.78
   1 -16  -5  693.11   48.83
   1  16  -5  729.46   69.70
   2  16  -3  305.46   20.95
   2 -16  -3  290.87   47.88
   6   5   7  133.59   17.40
   6  -5   7  168.73   25.06
   1 -14   9 2655.33   62.81
   1  14   9 2643.30   92.68
   5  -6 -13  317.31   31.13
   5   6 -13  381.53   88.93
   3 -12   9 1957.53   58.98
   3  12   9 2009.43   69.47
   7  -2  -8  120.50   18.92
   7   2  -8  128.20   26.90
   3   0  15  915.88   46.04
   4 -14   1   11.79   12.30
   4  14   1   15.23   10.47
   6  10  -2  373.03   34.38
   6 -10  -2  479.33   38.46
   2 -11 -13  971.89   57.25
   2  11 -13  941.59   43.58
   4  11   8   15.21    8.76
   4 -11   8    2.00   10.25
   3  12 -11  223.17   34.20
   3 -12 -11  257.84   32.86
   6   5 -11   35.66   18.08
   6  -5 -11   77.76    9.97
   2  15  -7  602.26   57.19
   2 -15  -7  638.67   62.10
   3   9  12   55.75   14.45
   3  -9  12   33.66   16.17
   3   0 -17 2204.98   70.71
   1   0  17   66.30   14.26
   5  12   2  113.64   18.75
   5 -12   2  115.36   17.22
   7   3   3  115.03   19.14
   7  -3   3  198.71   23.23
   2  16   2   10.71    6.29
   2 -16   2   21.95    7.59
   3  -1  15    5.20    4.30
   3   1  15    2.64    4.83
   7  -5   1 1220.85   48.85
   7   5   1 1205.16   67.81
   2   8  14  509.66   29.32
   2  -8  14  536.89   31.58
   2  -6  15  139.27   30.65
   2   6  15  178.24   24.44
   6  10  -1  274.81   48.84
   6 -10  -1  229.91   27.71
   6   3   8   30.09    9.17
   6  -3   8   29.57    9.75
   6 -10  -3  624.51   27.75
   6  10  -3  616.81   33.84
   3  -9 -14   83.33   19.67
   3   9 -14   43.94   32.09
   2  -4 -17  185.13   35.40
   2   4 -17  218.35   25.98
   2 -12 -12  170.43   35.04
   2  12 -12  136.10   28.18
   0   4  17    8.01    4.01
   0  -4  17   21.06   12.88
   5   3  11   62.97   16.74
   5  -3  11   71.18   13.77
   5  -4 -14  374.26   26.94
   5   4 -14  395.41   43.04
   3   1 -17  479.75   31.67
   3  -1 -17  426.71   43.04
   4  14  -4  179.85   21.77
   4 -14  -4  174.00   39.77
   1  -1  17 4362.13  109.45
   1   1  17 4442.02  110.42
   7  -6  -2 1763.53   72.69
   7   6  -2 1858.09   55.57
   6  -3 -12  745.18   44.88
   6   3 -12  794.62   48.79
   7  -4  -7   56.68   24.18
   7   4  -7   72.23   11.45
   0  15   8  449.22   34.76
   0 -15   8  438.47   32.52
   7   6  -3  103.86   18.26
   7  -6  -3  122.90   21.58
   4   2 -16  323.58   32.84
   4  -2 -16  361.74   37.73
   1 -15  -8  163.38   33.27
   1  15  -8  216.40   34.59
   7   0   4   11.34    9.85
   5  11  -8   94.26   26.94
   5 -11  -8  171.48   21.11
   2 -10 -14   25.77   18.39
   2  10 -14    6.34    7.92
   1  -9 -15  305.43   33.57
   1   9 -15  236.27   28.74
   4   8  11 2427.13   88.70
   4  -8  11 2452.30   73.80
   3  15   3  581.83   22.88
   3 -15   3  544.91   23.54
   7   6  -1  270.17   37.40
   7  -6  -1  252.27   41.22
   7  -5  -6  451.48   29.96
   7   5  -6  460.92   31.28
   3  15  -5  453.05   31.17
   3 -15  -5  491.97   66.60
   7  -1   4  812.51   52.11
   7   1   4  820.66   34.45
   2 -14   8 4903.66  117.18
   2  14   8 4957.55  136.71
   6  10   0   14.62    5.71
   6 -10   0   13.60    7.14
   0   7  16   60.75   14.06
   0  -7  16   60.97   18.97
   2   3  16 1710.74   91.28
   2  -3  16 1605.78   73.06
   3   2  15  531.76   24.80
   3  -2  15  632.62   37.83
   6  10  -4  521.30   21.35
   6 -10  -4  519.53   45.22
   6   9   3  215.91   39.98
   6  -9   3  201.01   18.73
   2 -15   6   94.38   22.37
   2  15   6  136.08   19.17
   1   8  15  838.29   69.05
   1  -8  15  954.42   50.54
   6  -9  -7  278.01   31.03
   6   9  -7  257.23   30.57
   4  -4  13    9.73    3.45
   4   4  13    3.91    7.93
   7   6  -4 3505.61   87.20
   7  -6  -4 3538.50  121.63
   4 -10 -12  359.16   44.15
   4  10 -12  341.18   44.75
   3  -2 -17 1756.40   75.57
   3   2 -17 1613.03   68.73
   2 -16  -4  103.60   33.78
   2  16  -4   78.88   13.62
   3  14   6  533.12   29.07
   3 -14   6  505.88   20.32
   1  -2  17  139.78   33.80
   1   2  17  137.70   22.60
   7  -3  -8  204.67   29.59
   7   3  -8  182.90   27.79
   4  13   5   17.25    4.03
   4 -13   5   20.92    6.61
   2   7 -16  118.92   19.72
   2  -7 -16  168.17   57.20
   3 -14  -8   33.87   14.17
   3  14  -8   47.21   16.83
   1  -5 -17 3300.76  133.04
   1   5 -17 3538.03   82.53
   4 -14   2  288.18   33.37
   4  14   2  352.13   34.52
   1  16   5  355.75   22.81
   1 -16   5  347.64   34.40
   1  14 -10  116.48   25.66
   1 -14 -10   90.39   15.83
   1   6  16  162.30   22.62
   1  -6  16  240.32   36.47
   5   6  10   64.91    9.66
   5  -6  10   46.79    7.73
   5  12  -6  705.94   36.32
   5 -12  -6  709.41   49.05
   4  -9 -13  280.38   30.46
   4   9 -13  179.08   30.56
   2  13 -11   30.93   12.40
   2 -13 -11   21.43   11.78
   5  11   5  854.12   43.57
   5 -11   5  916.86   37.88
   5  -9 -11  179.37   25.93
   5   9 -11  209.81   34.73
   0  14  10 1349.36   63.58
   0 -14  10 1188.79   74.09
   7   2   4  169.14   22.57
   7  -2   4  170.79   27.64
   4  11 -11   68.66   21.09
   4 -11 -11  115.97   29.07
   2 -16   3   13.56    8.36
   2  16   3   23.20    6.26
   7   6   0 1325.83   53.71
   7  -6   0 1293.17   55.38
   4  12   7   45.48   15.90
   4 -12   7   28.20   13.21
   0   9  15  118.89   15.21
   0  -9  15  139.57   27.40
   0  17   0    9.00   12.07
   0 -17   0   -2.92   19.99
   3   6  14    2.16    4.07
   3  -6  14   43.16   12.80
   3  13   8  481.75   28.54
   3 -13   8  512.20   51.03
   7   0  -9    4.88    5.74
   4  -3 -16  525.55   50.63
   4   3 -16  545.20   32.46
   0  16   6   52.00   33.40
   0 -16   6   79.42   28.34
   2 -11  12   43.59    4.81
   2  11  12   89.34   19.61
   4  14  -5   79.85   12.48
   4 -14  -5   64.52   17.62
   5  -8 -12  611.69   27.81
   5   8 -12  674.59   51.72
   1  12  12  135.73   22.60
   1 -12  12  131.47   16.07
   3  13 -10  441.32   44.66
   3 -13 -10  441.79   35.02
   7  -4   3   18.96    7.49
   7   4   3   14.85    6.17
   6   7   6 4695.94  148.72
   6  -7   6 4627.72  165.12
   3  -6 -16   46.20   16.20
   3   6 -16   41.21   11.55
   7   5   2  697.91   27.55
   7  -5   2  640.51   33.49
   2  12  11 1298.69   68.46
   2 -12  11 1194.33   48.85
   0 -17   1  263.75   28.85
   0  17   1  191.67   51.10
   6   4   8  709.05   59.75
   6  -4   8  748.54   55.74
   4   6 -15   16.78   12.19
   4  -6 -15   15.62   16.00
   7   1  -9  549.16   42.97
   7  -1  -9  497.51   34.44
   6  10   1  129.18   20.36
   6 -10   1  143.18   21.13
   5   4  11 1190.98   52.70
   5  -4  11 1179.32   59.86
   1  11  13  563.18   35.79
   1 -11  13  577.82   24.00
   5 -12   3   47.05   17.28
   5  12   3  103.04   15.44
   3   8  13  451.14   56.82
   3  -8  13  373.84   38.72
   7   6  -5   81.94   14.95
   7  -6  -5   97.10   20.09
   6 -10  -5  228.85   25.53
   6  10  -5  194.22   37.27
   6   7 -10   19.77   11.18
   6  -7 -10    9.45    7.26
   3  -3  15    6.43    8.98
   3   3  15   10.42   11.91
   1  16  -6  918.65   47.56
   1 -16  -6  770.66   42.14
   5 -10 -10   82.28   18.16
   5  10 -10   95.60   19.28
   6   4 -12 1009.54   57.40
   6  -4 -12  939.85   35.50
   6   8   5  302.11   29.12
   6  -8   5  341.78   36.42
   3  -8 -15  503.96   50.65
   3   8 -15  433.93   44.84
   4 -13  -8   52.89   14.40
   4  13  -8    7.55   10.64
   5   0 -1511127.24  548.74
   2  -9 -15  460.00   57.91
   2   9 -15  429.80   59.23
   3  -3 -17  124.82   26.93
   3   3 -17   90.01   30.80
   6   8  -9  476.27   52.38
   6  -8  -9  516.36   33.95
   1   3  17 2116.66  109.73
   1  -3  17 2037.32  108.05
   2   5 -17  282.80   35.97
   2  -5 -17  246.02   76.45
   0   5  17   14.76   14.31
   0  -5  17    5.07   22.82
   5  -1 -15   91.03   18.72
   5   1 -15   75.60   17.95
   6  -6   7 1351.34   72.32
   6   6   7 1256.41   53.30
   5   5 -14   19.15   13.77
   5  -5 -14    8.28    8.46
   2  10  13  306.44   28.14
   2 -10  13  259.31   26.65
   0  17   2  637.65   35.36
   0 -17   2  418.32   28.77
   1  13  11   92.74   25.17
   1 -13  11  130.57   16.10
   2   4  16   15.14    9.24
   2  -4  16   22.32   10.20
   7   5  -7   12.15    9.12
   7  -5  -7    7.09    7.75
   7  -2  -9  102.78   19.98
   7   2  -9  113.68   19.65
   6  -6 -11  322.50   26.93
   6   6 -11  278.28   55.70
   6   0   9   26.04   15.44
   5   9   8  477.15   60.52
   5  -9   8  427.49   28.06
   7   3   4   68.82   14.77
   7  -3   4   85.57   11.35
   3  15   4   18.74    9.20
   3 -15   4   22.48    6.79
   4  -8 -14  776.99   47.61
   4   8 -14  823.04   58.54
   2  16  -5  314.76   29.47
   2 -16  -5  306.22   53.07
   1   0 -18    3.69    6.91
   7  -4  -8   21.97   10.09
   7   4  -8   18.23    6.90
   3  15  -6 1001.79   44.46
   3 -15  -6 1003.38   63.63
   4   7  12   41.75   10.58
   4  -7  12   25.23    8.48
   7   6   1   14.62    7.10
   7  -6   1   11.05    5.27
   4  14   3  764.46   42.23
   4 -14   3  804.12   52.72
   1  17   0    3.02   13.72
   1 -17   0   18.73   16.36
   1 -15   8    9.20    6.97
   1  15   8   59.82   19.49
   2  13  10  122.01   28.08
   2 -13  10   97.41   15.24
   6   1   9   41.68    8.93
   6  -1   9   46.43   17.45
   6   0 -13   -3.37   11.59
   1 -17  -1   49.28   12.31
   1  17  -1   17.99   12.18
   5  -7 -13  196.36   25.83
   5   7 -13  227.16   37.83
   4 -12 -10   41.63    9.51
   4  12 -10   29.41   11.20
   1   1 -18 1152.28   52.10
   1  -1 -18 1121.39   54.62
   1  10  14   44.38   12.09
   1 -10  14   28.36   11.62
   2  15  -8 2584.58  107.09
   2 -15  -8 2598.76  101.59
   5  -8   9  689.54   36.48
   5   8   9  760.97   40.83
   5  -2 -15 1411.61   66.32
   5   2 -15 1374.01   83.43
   4   5  13  547.56   28.46
   4  -5  13  570.18   24.26
   6   1 -13  102.65   18.00
   6  -1 -13  103.74   15.70
   5 -10   7 1039.34   54.07
   5  10   7 1125.00   88.37
   5  13  -2  494.08   42.88
   5 -13  -2  565.10   49.86
   1  17   1  756.34   36.20
   1 -17   1  800.81   45.39
   5  13  -1   42.14   13.54
   5 -13  -1   61.45   14.86
   2   7  15   17.83    8.41
   2  -7  15   -4.73    9.82
   6  -9   4  459.12   18.47
   6   9   4  476.08   24.85
   1   8 -16   13.56    6.84
   1  -8 -16   27.71   14.76
   4  -4 -16 2162.08  102.59
   4   4 -16 2113.56   71.74
   2  16   4   22.15    8.49
   2 -16   4   34.08   12.25
   7   6  -6 4539.98  121.18
   7  -6  -6 4601.98  131.82
   6  -9  -8   17.74    5.04
   6   9  -8   18.58   11.86
   6 -10   2   35.85   16.06
   6  10   2   30.30   11.50
   1 -17  -2   22.56   15.93
   1  17  -2   47.37   14.00
   7   7  -2  373.61   29.83
   7  -7  -2  375.12   32.03
   2 -14 -10  404.02   47.44
   2  14 -10  303.40   67.72
   5 -12  -7   74.02   17.44
   5  12  -7   71.79   12.23
   6 -10  -6  282.62   21.73
   6  10  -6  319.40   21.96
   7   0   5 1998.60   70.09
   5 -13  -3    5.18   13.35
   5  13  -3   13.77    9.71
   4 -14  -6   67.03   17.70
   4  14  -6   64.35   13.17
   7  -7  -3 1350.71   92.20
   7   7  -3 1453.23   67.03
   0 -17   3  249.98   31.02
   0  17   3  268.99   31.52
   6   2   9   18.60    7.99
   6  -2   9    5.10    7.67
   5 -11  -9 1358.43   55.01
   5  11  -9 1372.40   73.97
   1  12 -13  128.74   18.65
   1 -12 -13  116.79   34.21
   1  -2 -18   23.62   10.66
   1   2 -18   21.02    8.50
   4   0  14 3027.98   93.14
   3  -4  15  708.19   49.24
   3   4  15  706.18   49.86
   5 -13   0  568.04   34.31
   5  13   0  499.80   36.77
   1  -6 -17  132.42   50.82
   1   6 -17  132.83   16.14
   7   1   5  108.51   20.76
   7  -1   5   89.11   19.84
   1  16   6   78.15   18.10
   1 -16   6   90.56   17.44
   7  -3  -9  462.41   39.94
   7   3  -9  455.39   37.71
   2   0 -18  136.79   21.10
   7  -7  -1  238.37   27.53
   7   7  -1  235.99   35.97
   6   2 -13    4.64    8.82
   6  -2 -13   12.96    7.65
   5   0  12    2.16   10.57
   3   4 -17 2569.03   83.87
   3  -4 -17 2527.81   93.54
   1   4  17  471.51   35.24
   1  -4  17  446.43   66.34
   7   5   3   31.67    9.30
   7  -5   3   10.07    8.92
   4   1  14  563.79   32.94
   4  -1  14  555.66   30.30
   1 -11 -14   10.05   19.37
   1  11 -14   14.05    8.26
   6   5   8  394.79   24.62
   6  -5   8  408.32   31.84
   1  17   2  996.99   47.79
   1 -17   2  986.45   69.85
   5   5  11  154.25   19.11
   5  -5  11  153.37   28.96
   2  -1 -18 1805.30   73.02
   2   1 -18 1827.45   64.91
   4 -10  10  640.93   25.81
   4  10  10  628.67   69.46
   3  11  11   30.23   10.16
   3 -11  11   23.05    8.22
   4  13   6   19.19    4.77
   4 -13   6   38.28   14.47
   7   7  -4  335.96   21.75
   7  -7  -4  311.76   35.51
   2  15   7  190.84   27.09
   2 -15   7  194.21   29.22
   0   0  18 2785.01   87.84
   5   1  12   22.32    7.29
   5  -1  12    7.45    7.81
   1 -15  -9  142.44   21.91
   1  15  -9  130.94   26.43
   1 -14  10  150.57   18.98
   1  14  10  184.43   35.43
   2  -9  14  178.48   29.67
   2   9  14  171.51   37.55
   5 -12   4  117.13   15.91
   5  12   4  124.42   19.99
   0  15   9    8.77   10.56
   0 -15   9   29.60    9.76
   3 -11 -13   18.96   13.73
   3  11 -13   29.33   13.14
   6   5 -12  153.50   31.17
   6  -5 -12  111.06   15.17
   1 -13 -12    5.25    9.38
   1  13 -12   -3.25   22.72
   0 -12  13   31.75   11.11
   0  12  13   32.42   10.72
   5   3 -15  572.88   43.95
   5  -3 -15  565.51   61.78
   4  11   9  254.09   28.37
   4 -11   9  308.53   42.61
   7  -4   4    9.24    7.32
   7   4   4    6.19    7.65
   3  14   7  684.27   43.41
   3 -14   7  689.03   14.36
   0   1  18 2938.72   77.20
   0  -1  18 2974.93   97.07
   5 -13  -4  782.67   44.69
   5  13  -4  640.86   35.69
   1   7  16   16.15    8.85
   1  -7  16   32.16   23.70
   0   8  16    4.56    5.18
   0  -8  16   17.65   17.85
   1 -17  -3  760.87   73.02
   1  17  -3  689.13   50.13
   5   7  10 2455.20   84.33
   5  -7  10 2274.32   63.03
   7   6   2 1027.31   39.35
   7  -6   2  964.90   55.58
   3  14  -9   34.08   13.69
   3 -14  -9   14.15   13.31
   7  -2   5 2178.85   78.03
   7   2   5 2133.41   69.58
   3 -12  10 1761.74   62.45
   3  12  10 1719.53   75.83
   0  16   7  306.99   36.38
   0 -16   7  248.21   36.84
   3  10  12   81.04   29.23
   3 -10  12   96.44   15.02
   5  11   6  342.82   66.04
   5 -11   6  294.46   31.56
   3 -16  -1  168.78   25.85
   3  16  -1   86.50   17.45
   3  12 -12   43.36   19.94
   3 -12 -12   48.78   14.45
   7   7   0  511.63   26.90
   7  -7   0  463.26   22.69
   2   5  16  133.21   18.94
   2  -5  16   80.92   17.08
   4  -2  14 2028.26   87.57
   4   2  14 1969.07   66.96
   2  -8 -16  130.36   27.71
   2   8 -16  136.77   20.72
   5  13   1  427.98   41.67
   5 -13   1  435.32   50.48
   3  10 -14   16.42   14.09
   3 -10 -14   51.51   20.69
   0  13  12 1360.71   66.36
   0 -13  12 1311.52   50.05
   4   9  11 2401.96   70.91
   4  -9  11 2366.58   63.63
   3   7  14  100.73   14.52
   3  -7  14  107.24   16.39
   0  11  14   20.72    6.88
   0 -11  14   13.71   11.89
   1  16  -7   59.26   15.20
   1 -16  -7   29.49   16.36
   2  -2 -18  559.41   35.35
   2   2 -18  496.88   28.95
   6   3   9   41.40    9.15
   6  -3   9   68.40   13.93
   3 -16   0  116.69   21.11
   3  16   0  142.39   23.43
   3 -16  -2   37.76   17.53
   3  16  -2   22.41    8.33
   2  14   9  190.27   36.58
   2 -14   9  141.58   19.22
   7   0 -10    7.90    4.66
   5   2  12   25.94    7.94
   5  -2  12   19.38    7.62
   2 -16  -6   32.78   18.70
   2  16  -6   19.32   12.68
   1  -3 -18  379.31   28.35
   1   3 -18  335.11   35.41
   7   5  -8   90.17   16.61
   7  -5  -8   82.96   14.74
   3  -7 -16  982.77   74.01
   3   7 -16  901.36   60.51
   4   7 -15   65.82   17.15
   4  -7 -15  112.06   24.20
   6 -11  -2 2023.50   70.59
   6  11  -2 1957.41   66.53
   4 -14   4 1989.59   74.91
   4  14   4 2011.46   61.60
   2   6 -17  279.09   29.27
   2  -6 -17  370.12   76.19
   0   6  17   48.26   12.97
   0  -6  17   36.23   17.80
   1   9  15   41.84   12.22
   1  -9  15   69.81   16.72
   6  -3 -13   79.19   12.46
   6   3 -13   99.57   15.40
   7  -7  -5   93.75   14.59
   7   7  -5   92.67   17.93
   7  -1 -10    1.91    5.29
   7   1 -10   10.66    5.09
   5  -6 -14  178.45   21.41
   5   6 -14  230.56   39.09
   0   2  18  405.23   31.52
   0  -2  18  388.25   28.82
   3  15   5   26.81   10.80
   3 -15   5   21.77    6.56
   0 -17   4  480.09   51.30
   0  17   4  528.78   34.48
   6  11  -1  795.94   49.12
   6 -11  -1  970.28   50.13
   3 -15  -7  527.82   37.60
   3  15  -7  442.07   31.92
   6  11  -3  113.77   33.27
   6 -11  -3  218.69   27.90
   1 -10 -15  424.13   44.28
   1  10 -15  383.47   31.66
   7  -6  -7  593.90   59.94
   7   6  -7  501.81   29.37
   1  17   3  880.96   49.17
   1 -17   3  757.70   54.27
   4  13  -9   16.19    8.60
   4 -13  -9   24.40   13.29
   6   8   6 1303.81   94.98
   6  -8   6 1216.62   55.96
   6  10   3  370.69   35.99
   6 -10   3  377.48   40.41
   2  12 -13  151.37   24.19
   2 -12 -13  148.26   30.16
   4 -12   8 1844.16   79.72
   4  12   8 1845.66   67.21
   3 -16   1 1183.83   67.75
   3  16   1 1202.35   51.80
   7   4  -9   21.39   11.33
   7  -4  -9   17.16    6.30
   4  -5 -16    5.81   12.18
   4   5 -16   30.24   11.62
   3  16  -3  416.41   36.43
   3 -16  -3  423.80   43.83
   6  10  -7   43.42   15.09
   6 -10  -7   44.05   10.32
   6   7   7    6.47    7.69
   6  -7   7   27.11    8.99
   6   8 -10 4027.62  113.66
   6  -8 -10 3918.99   91.17
   2 -11 -14  413.97   37.08
   2  11 -14  398.24   37.03
   5  13  -5   63.34    8.34
   5 -13  -5   75.90   29.06
   2 -16   5   11.59    6.04
   2  16   5   21.47    8.99
   4 -15  -1   36.19   19.27
   4  15  -1   49.09   25.72
   7   3   5  341.08   27.57
   7  -3   5  346.84   35.93
   6  -7 -11  130.24   18.43
   6   7 -11  140.38   25.68
   1  14 -11    2.96   19.42
   1 -14 -11   44.13   13.05
   4 -15  -2   40.77   17.88
   4  15  -2   17.85    5.19
   4  -6  13 1595.47   62.81
   4   6  13 1568.91   90.89
   7   2 -10  384.27   28.23
   7  -2 -10  322.21   18.37
   5  -9 -12   66.40   11.44
   5   9 -12   74.36   19.13
   1  17  -4  374.66   37.84
   1 -17  -4  316.99   36.97
   6 -11   0  564.90   39.74
   6  11   0  534.56   32.89
   3  13   9   70.55   25.39
   3 -13   9   38.67   11.62
   4   3  14   58.26   11.18
   4  -3  14   34.62    7.24
   4  14  -7  190.89   30.52
   4 -14  -7  136.06   24.91
   3  -5  15  420.71   71.77
   3   5  15  458.80   45.62
   6  11  -4  420.38   32.19
   6 -11  -4  407.43   37.19
   7   7   1   21.40    7.29
   7  -7   1   30.27    8.79
   4  10 -13 1569.80   80.84
   4 -10 -13 1605.31   83.16
   3 -13 -11 1187.39   65.24
   3  13 -11 1161.30   73.79
   2  -3 -18  157.20   30.54
   2   3 -18  161.97   26.07
   5   4 -15  263.53   38.09
   5  -4 -15  230.46   32.24
   5  10 -11 1020.07   87.70
   5 -10 -11  996.84   69.34
   3   9  13   33.01    8.83
   3  -9  13   36.58    8.46
   4  11 -12  345.61   39.09
   4 -11 -12  326.41   36.46
   4 -15   0  485.82   35.66
   4  15   0  460.46   35.12
   5  -3  12    1.44    5.93
   5   3  12   23.29    9.03
   3   5 -17   18.68    6.59
   3  -5 -17   54.22   13.69
   1  -5  17  404.26   25.12
   1   5  17  447.58   27.66
   5 -13   2  327.55   40.25
   5  13   2  400.59   42.67
   5 -12  -8   81.64   18.59
   5  12  -8  132.47   18.98
   0  14  11   95.34   22.06
   0 -14  11   97.82   19.50
   6   9   5   14.51    5.62
   6  -9   5   12.46    5.73
   0 -10  15   20.86   15.88
   0  10  15   17.98    5.79
   3   9 -15 1968.03   65.87
   3  -9 -15 1842.62   66.07
   2  13 -12 2367.76   82.20
   2 -13 -12 2414.10   78.81
   4   0 -17   11.06   11.54
   2   0  17    5.77    6.64
   0   3  18  866.32   41.07
   0  -3  18  878.91   66.76
   4  15  -3   98.32   12.60
   4 -15  -3  148.46   33.87
   6   9  -9   24.72   10.98
   6  -9  -9   10.64    6.04
   4   8  12  859.61   47.38
   4  -8  12  813.09   47.73
   4   1 -17   10.03    8.97
   4  -1 -17   11.21   14.48
   2 -17  -1    0.05   10.73
   2  17  -1   18.73    9.82
   6  -4   9   52.18   13.40
   6   4   9   40.44    7.84
   7   7  -6  285.85   34.21
   7  -7  -6  285.31   33.43
   7   5   4    9.35    7.53
   7  -5   4   18.73    5.73
   2   1  17    4.92    8.33
   2  -1  17   22.91    6.92
   2  15  -9  197.70   31.81
   2 -15  -9  300.65   36.91
   5  -8 -13 1913.30   58.96
   5   8 -13 1920.46   70.79
   2 -17   0   62.19   17.41
   2  17   0   93.17   17.78
   1   4 -18  281.25   34.37
   1  -4 -18  268.46   95.95
   7   6   3    5.13    5.49
   7  -6   3   13.21    4.53
   3 -16   2   25.54    9.50
   3  16   2   37.05    9.63
   3  16  -4   93.01   14.07
   3 -16  -4   85.21   23.78
   6   6   8  433.01   37.58
   6  -6   8  402.62   55.24
   5   6  11 2632.72   88.02
   5  -6  11 2551.76   74.07
   2  10 -15  615.04   64.48
   2 -10 -15  712.15   71.75
   6   4 -13   48.74   19.98
   6  -4 -13   20.04    7.12
   1  15   9   30.47   17.08
   1 -15   9   14.76    7.90
   4   9 -14  235.67   33.72
   4  -9 -14  202.61   34.79
   1 -16   7 1330.61   74.02
   1  16   7 1424.90   78.22
   4  15   1   18.14   18.98
   4 -15   1   26.53    9.52
   2  -8  15   88.88   14.44
   2   8  15   76.78   13.52
   2 -17  -2   47.96   13.27
   2  17  -2   48.80    9.59
   6  -6 -12  850.92   33.21
   6   6 -12  980.29   87.96
   1  -7 -17  387.12   65.99
   1   7 -17  363.18   29.62
   6 -11   1   18.27   10.97
   6  11   1   25.16   11.37
   5 -12   5   44.51   13.33
   5  12   5   32.02   10.08
   1 -17   4  948.67   78.09
   1  17   4 1077.59  100.85
   7   0   6   -2.85    9.42
   6 -11  -5   32.95   13.69
   6  11  -5   21.47    5.19
   7  -3 -10  178.61   26.73
   7   3 -10  158.42   27.47
   4  12 -11  556.87   52.09
   4 -12 -11  588.25   43.03
   2 -17   1   31.93   15.47
   2  17   1    6.36   10.12
   7   8  -2  169.09   21.79
   7  -8  -2  231.06   31.54
   5 -11 -10   26.05    9.24
   5  11 -10    3.30   10.97
   0  17   5   94.22   21.10
   0 -17   5   47.71   13.76
   5   9   9  801.27   57.18
   5  -9   9  677.02   30.23
   7   8  -3  581.35   32.68
   7  -8  -3  468.61   23.92
   3   0  16    2.90    5.73
   4  -2 -17   37.29   11.34
   4   2 -17   36.48   15.17
   2 -12  12 2053.30  110.96
   2  12  12 2171.59   80.76
   5  10   8  646.74   44.35
   5 -10   8  516.44   27.77
   2   2  17  150.44   28.85
   2  -2  17   95.73   22.15
   7  -1   6    3.03    5.59
   7   1   6    4.89    8.18
   4  15  -4   12.25    5.27
   4 -15  -4  -24.11   18.73
   2  -6  16   38.58   13.52
   2   6  16   49.01    9.18
   5  13  -6 1021.50   49.69
   5 -13  -6 1187.27   59.67
   7   4   5   67.89   11.47
   7  -4   5   49.34   12.55
   3   0 -18   28.53   11.21
   1   9 -16   16.68    8.43
   1  -9 -16   23.86   14.97
   3  -1  16   15.98   10.99
   3   1  16   21.76   10.59
   1  12  13  329.11   40.15
   1 -12  13  293.39   28.45
   7   8  -1    8.77    5.77
   7  -8  -1    4.47    5.52
   2  16  -7    9.10   10.80
   2 -16  -7   48.26   15.47
   2  11  13  125.95   20.28
   2 -11  13  123.84   14.34
   7   6  -8    5.65   13.35
   7  -6  -8   34.29    9.08
   4   4  14 1493.69   72.59
   4  -4  14 1554.16   93.63
   4  14   5   52.96    7.43
   4 -14   5   52.39   19.83
   4  13   7   23.68    8.12
   4 -13   7   15.39   10.29
   7  -7   2   37.98    9.41
   7   7   2   59.84   14.94
   3  -1 -18   50.21   13.71
   3   1 -18   29.20   11.35
   7  -5  -9  760.73   45.78
   7   5  -9  646.88   40.90
   1 -17  -5 1705.32   85.17
   1  17  -5 1823.00   84.03
   2   4 -18 1517.65   67.54
   2  -4 -18 1565.25   69.94
   2 -17  -3  133.15   34.02
   2  17  -3  125.46   16.98
   7   8  -4  661.74   30.41
   7  -8  -4  573.06   33.29
   5  -4  12  149.69   19.91
   5   4  12  128.33   18.55
   2  15   8   22.69   11.21
   2 -15   8   15.64    5.83
   6   0  10  742.25   45.19
   1  13  12   18.08   10.29
   1 -13  12   16.28    5.38
   2  13  11  760.39   58.88
   2 -13  11  663.59   23.07
   6  10   4   97.65   18.75
   6 -10   4   58.07   12.41
   2 -14 -11  886.15   44.53
   2  14 -11  931.32   64.12
   0 -16   8  215.89   31.26
   0  16   8  174.10   53.12
   5  13   3 1282.05   59.27
   5 -13   3 1205.89   58.99
   1  16  -8   12.83   14.15
   1 -16  -8   25.52   13.73
   7  -2   6   75.17   18.93
   7   2   6  168.45   23.75
   0   4  18  429.91   45.55
   0  -4  18  361.98   44.13
   1   8  16   48.60   18.98
   1  -8  16   77.77   19.12
   6  -1  10   51.14   13.27
   6   1  10   23.66   13.52
   6  10  -8 1970.54   67.17
   6 -10  -8 1998.56   76.74
   1   0  18   12.89   13.21
   3 -15   6  273.25   29.75
   3  15   6  231.18   31.01
   6   0 -14 1630.37   94.56
   5   8  10  782.80   55.55
   5  -8  10  702.16   36.80
   2 -17   2 1405.51   58.82
   2  17   2 1398.46   64.25
   1 -11  14   14.94    6.86
   1  11  14   10.48    6.61
   3  15  -8  402.75   42.56
   3 -15  -8  470.77   47.34
   4  15   2  701.46   52.46
   4 -15   2  664.27   40.28
   2  -7 -17 1587.61   87.11
   2   7 -17 1441.61   55.52
   0  -7  17   54.57   27.26
   0   7  17   52.34   16.77
   3 -14   8   22.95   16.44
   3  14   8   32.07   14.00
   3 -16   3  106.05   16.14
   3  16   3  101.59   18.06
   4  -6 -16  364.10   36.01
   4   6 -16  359.30   42.31
   3   2  16  227.95   31.16
   3  -2  16  262.37   52.39
   5   5 -15  116.87   22.64
   5  -5 -15  179.21   27.78
   3  16  -5   15.27    7.59
   3 -16  -5   51.75   21.34
   5 -11   7 1658.04   61.04
   5  11   7 1719.08   94.67
   5  -7 -14  546.99   34.70
   5   7 -14  605.16   71.30
   1 -15 -10   77.60   16.49
   1  15 -10   46.68   13.90
   3  14 -10  447.49   53.97
   3 -14 -10  531.66   44.08
   1  -1  18    3.98    5.44
   1   1  18    8.62    5.18
   7  -8   0 1600.00   95.08
   7   8   0 1661.16   73.21
   6   1 -14   40.88   11.66
   6  -1 -14   33.04   15.61
   5   0 -16    2.91   16.21
   3   2 -18   67.69   13.72
   3  -2 -18   87.80   18.49
   7   7  -7  110.63   20.48
   7  -7  -7  112.96   17.18
   3   8  14  616.08   38.08
   3  -8  14  477.12   12.86
   2 -16   6 1844.37   93.37
   2  16   6 1870.03   57.37
   4  -3 -17   58.84   14.25
   4   3 -17   11.51   13.56
   0 -15  10   21.57   10.03
   0  15  10    4.78   11.44
   2  -3  17   13.84    6.56
   2   3  17   -5.03    9.34
   6  11   2 1852.97   71.99
   6 -11   2 1926.08   99.24
   7   0 -11  584.98   28.01
   0   9  16   93.65   11.68
   0  -9  16  134.52   25.32
   3  -6  15   61.95   15.61
   3   6  15   61.92   11.77
   3   8 -16  559.53   40.70
   3  -8 -16  524.06   59.71
   5   1 -16  249.41   36.56
   5  -1 -16  222.50   35.78
   4  -8 -15  236.95   33.73
   4   8 -15  275.72   40.60
   6 -11  -6   62.79   21.48
   6  11  -6   35.98    9.11
   4  14  -8  116.41   13.59
   4 -14  -8  144.74   24.87
   6  -5   9 1717.48   81.91
   6   5   9 1661.76   91.95
   4  15  -5  323.77   27.38
   4 -15  -5  385.31   28.29
   7  -8  -5  842.78   42.94
   7   8  -5  897.24   51.26
   7  -4 -10   43.57   16.20
   7   4 -10   79.89   24.12
   3  -6 -17 2685.35  101.67
   3   6 -17 2563.71   73.64
   6  -2  10 2519.55   91.73
   6   2  10 2477.33   60.52
   7   1 -11 1286.15   58.18
   7  -1 -11 1352.44   68.04
   1   6  17    9.94    9.51
   1  -6  17   55.21   18.51
   1  -5 -18  380.85   45.68
   1   5 -18  370.50   27.00
   2   9 -16  343.15   26.37
   2  -9 -16  456.03   36.35
   2  10  14  725.06   51.64
   2 -10  14  736.39   24.08
   4  -7  13    0.97    4.10
   4   7  13   48.82   18.09
   6   5 -13   96.74   20.85
   6  -5 -13   65.09    8.45
   2  17  -4  984.43   45.59
   2 -17  -4 1056.19   73.82
   4  13 -10 1421.92   66.61
   4 -13 -10 1390.11   76.68
   1   2  18   26.77   11.25
   1  -2  18   20.44    7.28
   6   2 -14 1201.86   57.50
   6  -2 -14 1243.09   54.93
   1  14  11  922.36   43.74
   1 -14  11  869.94   41.41
   4  11  10   83.50   16.16
   4 -11  10   58.17    9.90
   1 -17   5  110.26   15.90
   1  17   5  103.86   22.51
   5 -12  -9 1694.67   76.06
   5  12  -9 1780.62   66.27
   6   8   7  170.02   20.48
   6  -8   7  172.74   29.96
   7   6   4   68.31   12.69
   7  -6   4   61.35   10.30
   7   3   6   90.52   17.00
   7  -3   6   74.95   16.92
   5   2 -16  209.59   34.92
   5  -2 -16  304.56   38.44
   4 -10  11    0.13    6.85
   4  10  11    6.07    8.93
   2  14  10 1467.14   90.40
   2 -14  10 1389.36   44.67
   3  -3  16   10.69    7.85
   3   3  16   10.07    8.85
   6   8 -11  611.44   45.15
   6  -8 -11  630.11   40.22
   2 -17   3   32.72    8.66
   2  17   3   33.06   19.46
   7  -2 -11   55.95   10.79
   7   2 -11   61.86   11.98
   6   9   6  601.80   37.80
   6  -9   6  648.55   27.32
   7   8   1   72.12   13.05
   7  -8   1   80.55   10.03
   1 -12 -14  490.35   41.76
   1  12 -14  459.07   35.71
   5  13  -7   18.79    4.90
   5 -13  -7   31.83   13.64
   7   5   5  570.32   51.73
   7  -5   5  596.12   36.80
   3   3 -18   26.13   15.31
   3  -3 -18   12.50   11.55
   1 -10  15   -0.90    8.95
   1  10  15    1.25    2.60
   0 -17   6  367.15   45.02
   0  17   6  391.61   39.19
   3  12  11 1889.72   84.47
   3 -12  11 1894.17   97.88
   3  11  12  745.20   37.03
   3 -11  12  773.98   71.43
   1 -13 -13  391.53   40.08
   1  13 -13  413.59   44.84
   5 -14  -2   69.80   30.62
   5  14  -2   77.44   30.72
   6   9 -10   30.96   18.34
   6  -9 -10   47.68    9.08
   7   7   3  313.79   34.53
   7  -7   3  320.91   24.12
   4   5  14  791.07   45.14
   4  -5  14  657.99   42.12
   5 -14  -1  712.61   35.50
   5  14  -1  698.00   42.89
   3 -12 -13  663.51   61.51
   3  12 -13  551.94   33.76
   6  -7   8 1348.54   66.29
   6   7   8 1311.98   63.86
   3  11 -14  110.07   41.28
   3 -11 -14  130.81   34.58
   4  15   3   88.95   18.84
   4 -15   3   94.19   15.94
   5  -7  11  214.99   43.04
   5   7  11  284.99   42.28
   2  -5 -18  223.71   61.39
   2   5 -18  210.88   29.05
   4 -12   9   62.30   14.58
   4  12   9   70.09   21.68
   5   5  12  851.17   44.61
   5  -5  12  900.21   48.67
   6  -3  10   11.73    6.75
   6   3  10   39.44    9.88
   8   0  -3   37.35   13.43
   1  17  -6  673.74   62.64
   1 -17  -6  619.51   38.50
   6   7 -12  434.70   51.96
   6  -7 -12  352.65   28.09
   8   0  -2   13.89    5.09
   0 -18   0    9.92   33.10
   0  18   0   46.55   22.19
   5 -14  -3   47.32   16.15
   5  14  -3   29.36   16.85
   4  -4 -17  588.69   39.97
   4   4 -17  671.24   55.13
   7  -8  -6 3147.77   96.35
   7   8  -6 3166.85   96.11
   5  12   6   64.63   27.66
   5 -12   6   59.57    7.92
   2  -4  17 1552.58   82.66
   2   4  17 1549.39   75.62
   3  16   4 1831.74   72.43
   3 -16   4 1827.93   67.68
   0   5  18  405.38   30.08
   0  -5  18  383.77   45.18
   1   3  18   81.37   16.65
   1  -3  18   52.88   15.46
   5   0  13 1010.46   41.58
   6  -3 -14   38.41   12.67
   6   3 -14   42.43   11.82
   8   1  -3  109.03   37.28
   8  -1  -3  122.86   15.57
   3  16  -6   83.24   16.38
   3 -16  -6  100.87   24.12
   5  13   4    5.05    7.52
   5 -13   4   11.54    7.37
   5 -14   0  161.78   25.37
   5  14   0  122.72   19.00
   0 -18   1   19.97   12.65
   0  18   1   34.05   14.13
   8  -1  -2  129.69   17.19
   8   1  -2  193.59   35.72
   1 -11 -15   29.21   12.33
   1  11 -15   15.07    7.18
   7   6  -9   20.72   12.35
   7  -6  -9   60.22   15.60
   0  12  14   26.38    9.96
   0 -12  14   26.09    8.85
   1  16   8  698.16   41.02
   1 -16   8  579.73   30.36
   0  13  13   15.84   15.88
   0 -13  13   38.72    9.31
   8   0  -4  580.10   42.81
   5 -10 -12  238.43   34.20
   5  10 -12  217.91   34.13
   5   1  13   99.27   14.98
   5  -1  13   79.98   16.03
   2  -7  16  200.26   57.99
   2   7  16  211.17   29.11
   4  -9  12  104.17   14.97
   4   9  12   51.26   12.47
   5  -3 -16    0.65   14.49
   5   3 -16   50.09   12.18
   6 -11   3   89.34   24.39
   6  11   3  107.85   39.38
   2  15 -10 1066.03   52.15
   2 -15 -10  962.32   62.62
   1   8 -17  101.58   13.80
   1  -8 -17   89.22   22.67
   6 -12  -2   19.68    7.13
   6  12  -2   14.49    9.74
   8   0  -1    7.61    3.78
   2 -16  -8  856.50   60.99
   2  16  -8  866.64   64.71
   3  13  10   10.62    6.95
   3 -13  10    9.75    7.87
   4 -15  -6  152.39   26.00
   4  15  -6  196.45   35.59
   8  -1  -4   90.72   13.62
   8   1  -4   79.09   26.98
   6  11  -7 2992.78   87.81
   6 -11  -7 2978.11   98.33
   3 -10  13 1225.78   70.22
   3  10  13 1246.72   57.59
   4 -14   6  121.10   16.03
   4  14   6  109.00   13.63
   5  -9 -13   24.79   11.39
   5   9 -13   24.12   15.20
   3  13 -12   68.16   20.58
   3 -13 -12  109.40   24.25
   7  -3 -11  596.98   18.93
   7   3 -11  675.98   55.06
   2  17  -5   22.74   14.12
   2 -17  -5   51.02   25.51
   7   7  -8 1702.38   78.08
   7  -7  -8 1747.50   84.21
   6 -12  -1   82.66   17.85
   6  12  -1   53.12   14.37
   1 -14 -12 1036.00   53.21
   1  14 -12  985.48   57.10
   6  10   5    7.81   10.11
   6 -10   5   18.11    5.35
   6  12  -3  124.47   21.74
   6 -12  -3  114.79   25.39
   4   0  15    0.33    5.76
   3 -10 -15   90.66   20.44
   3  10 -15   37.22   16.00
   8   1  -1   35.97    6.77
   8  -1  -1   16.27    7.27
   5   6 -15 2727.92  105.22
   5  -6 -15 2608.05   77.94
   1   0 -19 1351.48   62.46
   7  -4   6    8.71    6.80
   7   4   6   10.33   11.02
   7   5 -10   92.19   15.26
   7  -5 -10   92.06   16.33
   5  14  -4  174.40   32.15
   5 -14  -4  124.36   32.03
   6 -10  -9  262.62   28.39
   6  10  -9  238.20   37.72
   8  -2  -3  308.33   29.38
   8   2  -3  294.46   52.22
   0  18   2  679.89   38.72
   0 -18   2  590.64   45.81
   7   0   7 1427.28   65.20
   2   9  15  365.93   65.46
   2  -9  15  304.14   36.79
   8  -2  -2  391.66   24.11
   8   2  -2  389.61   48.01
   4  -1  15   79.12   16.26
   4   1  15   72.10   10.93
   4 -11 -13  241.14   29.52
   4  11 -13  156.79   30.93
   3  -4  16    4.31   11.31
   3   4  16    6.53    7.38
   5 -11 -11  686.56   52.72
   5  11 -11  655.85   59.53
   1   1 -19  694.91   24.13
   1  -1 -19  658.09   38.88
   5   2  13  884.97   63.59
   5  -2  13  950.80   38.91
   1  15  10   75.06   14.31
   1 -15  10   97.68   14.11
   7  -1   7   23.06    8.31
   7   1   7   21.65   12.59
   8   0  -5   13.54   15.42
   2  12 -14  103.95   19.38
   2 -12 -14  139.31   25.85
   7  -9  -2  363.42   28.39
   7   9  -2  300.71   27.81
   7   8   2  111.40   25.01
   7  -8   2  123.71   15.98
   5 -14   1    8.33   11.28
   5  14   1    3.50   19.87
   0 -11  15   28.79    8.47
   0  11  15   27.08    8.57
   3  -4 -18   19.52    7.60
   3   4 -18   29.91   12.70
   0  14  12   22.91   11.34
   0 -14  12    9.98   11.30
   1  18   0   84.79   21.58
   1 -18   0   61.51   17.45
   7  -9  -3 1511.88   56.55
   7   9  -3 1461.45   56.61
   4  -7 -16   16.78   12.87
   4   7 -16   13.43    9.62
   2 -17   4  571.47   65.61
   2  17   4  527.70   31.58
   8   2  -4  357.18   50.94
   8  -2  -4  275.50   31.85
   6  -6   9  110.18   15.63
   6   6   9   95.93   13.12
   1 -18  -1   24.29   15.78
   1  18  -1    7.57   10.50
   3  15   7  549.98   21.75
   3 -15   7  528.46   30.57
   4 -10 -14 1112.57   61.06
   4  10 -14 1034.57   71.68
   6  12   0 1219.28   62.67
   6 -12   0 1283.89   67.59
   1  -6 -18   20.23   15.33
   1   6 -18    5.96    4.43
   8  -1  -5   43.34   12.53
   8   1  -5   73.45   16.19
   6  12  -4   -0.11   12.72
   6 -12  -4   25.19   16.36
   3  15  -9 1836.96   77.18
   3 -15  -9 1686.00   84.12
   8   0   0  305.76   32.16
   8   2  -1  307.69   33.59
   8  -2  -1  246.91   28.91
   2  13 -13   20.02   21.65
   2 -13 -13   14.28   15.01
   4 -13   8  223.79   34.52
   4  13   8  191.43   27.05
   7   9  -1  435.59   38.23
   7  -9  -1  433.34   21.24
   6  -6 -13   35.28   11.66
   6   6 -13   42.93   20.43
   4 -12 -12 2127.70   96.32
   4  12 -12 1821.60   87.49
   2  16   7  634.51   66.62
   2 -16   7  679.81   39.39
   6   4  10  385.11   32.71
   6  -4  10  422.46   34.05
   1  16  -9   13.60   11.84
   1 -16  -9   37.37   12.59
   1 -18   1  757.45   50.13
   1  18   1  773.39   52.10
   3   7  15   79.85   11.35
   3  -7  15   85.82   15.68
   0  16   9   16.48   14.31
   0 -16   9    6.38    9.14
   8  -1   0   65.73   12.63
   8   1   0   65.93    9.48
   4   2  15  136.23   18.68
   4  -2  15  126.82   17.18
   1  17   6   17.35   11.34
   1 -17   6   20.16    7.64
   2  -8 -17  730.97   52.71
   2   8 -17  611.87   50.67
   5  10   9   95.92   19.89
   5 -10   9   62.44    8.61
   0   8  17   21.47   12.41
   0  -8  17   38.06   14.11
   2   0 -19   13.21    9.10
   1  -2 -19  672.13   48.60
   1   2 -19  688.86   41.89
   2 -11 -15  404.97   39.79
   2  11 -15  319.01   39.24
   7  -9  -4  637.44   26.41
   7   9  -4  593.88   34.35
   2 -15   9  168.87   21.07
   2  15   9  298.10   50.85
   4 -14  -9   29.60   12.31
   4  14  -9   20.20   10.26
   5   8 -14   16.31   16.08
   5  -8 -14   55.62   15.58
   3  -7 -17   43.98   22.24
   3   7 -17   19.47    9.27
   1   4  18   21.07   16.58
   1  -4  18   16.03    8.03
   1  18  -2  129.50   24.09
   1 -18  -2   52.53   20.01
   1   7  17   23.99   10.28
   1  -7  17   31.29   12.47
   6  -4 -14  844.04   59.65
   6   4 -14  783.69   48.50
   7  -2   7  235.30   28.82
   7   2   7  240.39   33.46
   4  15   4  121.45   19.87
   4 -15   4  104.49   14.02
   1  10 -16    8.29    7.11
   1 -10 -16   60.40   17.84
   7   8  -7 1581.46   84.03
   7  -8  -7 1488.12  108.80
   2  -1 -19   89.49   20.82
   2   1 -19   75.61    9.76
   0 -18   3  101.31   20.50
   0  18   3   97.04   19.12
   1   9  16  631.15   51.52
   1  -9  16  602.67   58.66
   8  -3  -3  528.00   30.38
   8   3  -3  572.01   47.46
   5 -13  -8  155.54   28.04
   5  13  -8  140.11   23.79
   8   2  -5  324.86   39.66
   8  -2  -5  282.68   31.73
   5  -9  10   50.34   10.69
   5   9  10   57.81   19.05
   5 -14  -5  446.35   50.14
   5  14  -5  331.31   21.38
   5  -4 -16   24.06   14.75
   5   4 -16   12.06   11.36
   8   3  -2  481.95   40.51
   8  -3  -2  445.51   20.70
   7   6   5  139.34   18.17
   7  -6   5  149.64   20.35
   4   5 -17  521.81   58.60
   4  -5 -17  403.27   50.83
   5  11   8   42.27   14.69
   5 -11   8   29.70   10.92
   7   7   4  283.35   40.19
   7  -7   4  256.86   31.31
   2   5  17 1584.32   88.97
   2  -5  17 1740.07   99.69
   7   9   0  697.55   32.15
   7  -9   0  831.22   53.60
   7   4 -11 1183.10   62.78
   7  -4 -11 1107.05   45.76
   5   3  13 1034.08   62.53
   5  -3  13  960.21   61.36
   3  14   9  177.91   25.27
   3 -14   9  238.81   50.99
   0   0  19    7.81    4.68
   4  -6  14 2798.83   75.80
   4   6  14 2784.02   89.75
   8  -2   0   30.01    8.79
   8   2   0   32.95    7.00
   8   0  -6   24.49   21.18
   1  18   2   14.57   21.21
   1 -18   2   16.80    9.41
   3   9  14  300.12   34.09
   3  -9  14  300.33   39.27
   3 -14 -11  623.69   47.95
   3  14 -11  645.16   63.63
   6 -12   1  173.23   30.04
   6  12   1  232.88   54.86
   2   6 -18  317.88   39.70
   2  -6 -18  435.11   47.30
   8   3  -4   26.43   10.64
   8  -3  -4   11.96    7.81
   0 -17   7  263.92   38.89
   0  17   7  353.93   45.44
   4  -8  13   19.08   13.71
   4   8  13   12.33    7.88
   6  12  -5   57.83   10.47
   6 -12  -5   83.31   18.30
   3 -17  -1  646.01   37.96
   3  17  -1  552.03   23.08
   5  -6  12  142.70   25.91
   5   6  12   57.72   13.82
   3 -16   5  669.54   32.16
   3  16   5  569.55   33.08
   7   0 -12    0.00    7.00
   5 -14   2  461.74   30.58
   5  14   2  483.49   45.15
   0  -1  19   13.00    5.55
   0   1  19   12.33    7.92
   3  -9 -16 1545.93   69.48
   3   9 -16 1352.62   84.44
   5  12 -10 1274.14   62.74
   5 -12 -10 1323.01   65.74
   3 -16  -7   26.23   36.20
   3  16  -7   54.29   13.22
   4   9 -15  807.76   56.01
   4  -9 -15  782.84   54.31
   8   3  -1  299.78   40.65
   8  -3  -1  290.63   25.61
   8   1  -6  468.28   73.33
   8  -1  -6  445.99   35.68
   2 -14 -12  110.49   23.57
   2  14 -12   26.83   14.95
   1  17  -7  480.41   46.65
   1 -17  -7  513.03   31.90
   2  -2 -19 2215.99   73.59
   2   2 -19 2215.68   71.08
   1  15 -11 1334.05   70.93
   1 -15 -11 1294.31   68.11
   3 -17   0  782.34   46.83
   3  17   0  723.28   27.10
   7   9  -5  706.25   43.33
   7  -9  -5  644.69   23.73
   3  17  -2   44.98   12.32
   3 -17  -2   58.69   20.08
   0  -6  18   -2.04   17.77
   0   6  18   22.43   13.29
   2  17  -6  676.26   38.75
   2 -17  -6  702.71   72.06
   7   1 -12   92.41   13.92
   7  -1 -12   77.02   13.29
   1  18  -3   47.53   19.87
   1 -18  -3   50.68   13.55
   4  15  -7   50.81   10.42
   4 -15  -7   57.84   22.37
   8   0   1    9.20    5.64
   4  -3  15  255.30   26.51
   4   3  15  192.17   34.57
   6  11   4 2211.87   67.79
   6 -11   4 2393.24  103.95
   5 -13   5   -0.59    3.90
   5  13   5    4.95    4.21
   1   3 -19  747.76   39.54
   1  -3 -19  754.52   31.57
   7   5   6   32.97    8.54
   7  -5   6   21.54    7.23
   6 -11  -8   24.03    8.90
   6  11  -8   26.57   14.61
   4 -13 -11   43.56   15.15
   4  13 -11   38.16   16.27
   0  10  16   69.59   11.72
   0 -10  16   68.82   19.89
   2 -12  13  347.05   52.52
   2  12  13  387.18   28.17
   7   3   7  127.91   20.98
   7  -3   7  126.44   17.51
   8  -1   1   10.70    6.20
   8   1   1   12.49    5.72
   0  15  11  352.62   31.05
   0 -15  11  340.64   34.88
   4  16  -1  475.62   42.98
   4 -16  -1  559.07   37.23
   3   5  16  206.45   28.30
   3  -5  16  169.20   63.08
   4  16  -2   14.57    5.34
   4 -16  -2   33.14   32.46
   2  13  12   28.48   13.09
   2 -13  12   16.24    7.26
   6   9   7  836.88   27.84
   6  -9   7  779.26   35.81
   6   0  11   12.80   16.49
   0   2  19  875.28   35.53
   0  -2  19  911.95   62.75
   7   8   3   96.22   17.03
   7  -8   3   86.60   11.81
   8  -3  -5   72.08    8.90
   8   3  -5   99.68   29.26
   2  10 -16    7.46    7.88
   2 -10 -16   29.38   13.23
   6  -8   8  674.23   37.86
   6   8   8  677.44   23.44
   8  -2  -6  322.62   21.75
   8   2  -6  391.95   56.08
   3  -5 -18   23.29   14.85
   3   5 -18   30.55   11.89
   3 -17   1   -4.41    9.33
   3  17   1   13.87    7.00
   7   7  -9  905.05   55.20
   7  -7  -9  948.48   33.99
   4   0 -18  255.69   32.25
   5  -8  11 2686.51   88.11
   5   8  11 2771.16  138.34
   3 -17  -3  700.60  105.29
   3  17  -3  593.06   21.31
   1 -13  13  108.57   16.85
   1  13  13  128.02   27.29
   6  -9 -11 1344.29   57.68
   6   9 -11 1319.75   63.69
   7   6 -10   19.17    7.84
   7  -6 -10   59.01   16.63
   4 -16   0  784.28   58.41
   4  16   0  707.53   42.49
   6   1  11  239.52   28.99
   6  -1  11  255.03   34.02
   7  -2 -12  191.46   21.20
   7   2 -12  202.51   26.78
   0 -18   4  120.09   26.00
   0  18   4   84.48   19.80
   7   9   1 2343.27  106.02
   7  -9   1 2340.72  104.00
   2  17   5  307.34   36.05
   2 -17   5  299.58   33.65
   6   0 -15   17.50    8.71
   1 -12  14    7.87    8.88
   1  12  14   22.90   11.73
   6  -8 -12   22.39    7.80
   6   8 -12   45.46   14.77
   8   3   0   54.58    8.39
   8  -3   0   38.73   10.51
   4  -1 -18  909.59   42.07
   4   1 -18  797.31   71.83
   1  18   3  251.40   35.00
   1 -18   3  258.48   37.29
   5  12   7  615.65   61.85
   5 -12   7  517.14   21.80
   4 -16  -3 1374.42   78.26
   4  16  -3 1183.54   46.65
   6  -5  10   38.63   10.21
   6   5  10   14.99    5.73
   8   4  -3 1140.92   96.29
   8  -4  -3 1155.93   44.12
   8   2   1  373.69   23.52
   8  -2   1  375.54   30.60
   2 -11  14   76.74    9.86
   2  11  14  112.20   23.17
   6   1 -15   17.06   15.81
   6  -1 -15   17.97    8.06
   5 -14  -6  180.66   29.59
   5  14  -6  107.57   13.45
   8   4  -2  687.12  101.32
   8  -4  -2  472.56   28.54
   2  -3 -19  236.06   31.33
   2   3 -19  213.20   32.91
   5  -7 -15   30.79    8.98
   5   7 -15   22.37   13.02
   2  16  -9  494.69   61.23
   2 -16  -9  479.08   52.34
   6  12   2  731.64   62.57
   6 -12   2  753.05   71.03
   1  -5  18  687.22   83.33
   1   5  18  761.51   40.68
   5  -4  13 1818.62   62.71
   5   4  13 1873.99   56.25
   6  -5 -14  502.65   37.09
   6   5 -14  534.24   71.75
   2   8  16   40.13    8.62
   2  -8  16   21.47    8.30
   6  10   6  826.90   23.23
   6 -10   6  837.07   40.74
   4  14   7    5.25    8.64
   4 -14   7   33.97    9.87
   6 -12  -6  406.64   35.96
   6  12  -6  374.30   25.55
   8   0  -7   29.56   12.38
   8   4  -4 1358.35   69.44
   8  -4  -4 1204.64   63.40
   7   9  -6   78.35   16.01
   7  -9  -6   79.36    8.94
   1  16   9   71.32   23.93
   1 -16   9   61.75   10.70
   1  18  -4  291.25   33.68
   1 -18  -4  284.31   36.03
   6  10 -10 2541.04   91.63
   6 -10 -10 2508.12   60.70
   1  14  12   22.63   11.60
   1 -14  12   27.52    8.07
   6  -2  11   54.89   12.57
   6   2  11  100.67   17.79
   7   8  -8 1222.39   63.06
   7  -8  -8 1162.41   64.19
   4 -16   1   52.04   13.31
   4  16   1   42.27   16.21
   2 -14  11  479.63   39.72
   2  14  11  523.08   37.88
   5  -5 -16  896.36   42.92
   5   5 -16  903.56   39.43
   8  -4  -1  320.50   25.50
   8   4  -1  331.23   32.21
   2   0  18   32.91   14.47
   4  11  11  181.75   26.40
   4 -11  11  163.58   23.08
   4  -2 -18 2947.11   88.58
   4   2 -18 2914.05   93.73
   8  -1  -7   61.85   27.18
   8   1  -7   42.13   21.62
   6  -7   9  512.32   49.25
   6   7   9  479.84   20.57
   5  14   3   50.18   14.85
   5 -14   3   84.01   17.93
   7  -5 -11   65.40    8.39
   7   5 -11   85.91   17.43
   0   3  19  424.66   38.69
   0  -3  19  493.99   42.25
   1   7 -18    7.22    5.51
   1  -7 -18   25.92   12.05
   3 -17   2  231.63   29.38
   3  17   2  292.52   20.83
   4 -15   5   37.92    8.71
   4  15   5   51.93    8.56
   6  -2 -15   25.94    7.68
   6   2 -15    9.67   12.53
   3 -17  -4  106.01   29.31
   3  17  -4  117.37   17.85
   1   9 -17  888.31   55.05
   1  -9 -17 1027.92   86.17
   4  -4  15  175.72   33.12
   4   4  15  154.15   24.79
   2   1  18 1332.29   65.46
   2  -1  18 1311.43   67.73
   8   3  -6  187.83   27.09
   8  -3  -6  181.38   30.54
   4  12  10 2225.06   83.54
   4 -12  10 2207.84   65.10
   1  11  15  203.33   25.36
   1 -11  15  211.75   30.03
   1  -4 -19 1261.92   77.86
   1   4 -19 1166.54   59.87
   6   7 -13 1301.88   72.98
   6  -7 -13 1279.41   53.50
   8   0   2 1494.91   67.30
   4 -16  -4   70.78   26.10
   4  16  -4   39.36    8.54
   7  -3 -12  103.03   13.92
   7   3 -12  130.05   21.16
   1 -17   7  159.40   21.00
   1  17   7   88.66   20.39
   7   4   7  199.93   21.96
   7  -4   7  196.80   25.70
   2  15 -11   61.38   19.82
   2 -15 -11   74.06   18.92
   4  -8 -16  393.88   36.39
   4   8 -16  272.81   45.07
   4  -6 -17  300.89   68.74
   4   6 -17  264.52   51.21
   5   0 -17 2739.22   87.73
   2  18  -1   83.82   13.38
   2 -18  -1  106.77   23.39
   8   1   2  522.21   32.13
   8  -1   2  568.77   38.82
   2  -6  17  550.53   45.88
   2   6  17  444.26   39.42
   3   0  17   79.41   12.48
   2  18   0   23.66    7.71
   2 -18   0   27.65   12.11
   8  -4  -5   87.88   23.25
   8   4  -5   70.02   21.01
   8  -3   1   11.89    6.18
   8   3   1    5.68    8.31
   4  10  12  322.57   34.40
   4 -10  12  321.79   53.00
   3 -15   8   52.13    8.02
   3  15   8   75.84   14.56
   8  -2  -7  158.83   41.31
   8   2  -7  233.71   41.40
   5   1 -17  664.32   84.79
   5  -1 -17  596.92   63.37
   5  13  -9  133.87   24.28
   5 -13  -9  201.36   29.12
   3  12  12  607.65   62.29
   3 -12  12  505.93   43.63
   3   0 -19   84.55   22.45
   2  16   8 3040.72   90.55
   2 -16   8 2967.67   72.90
   5 -10 -13  615.06   45.58
   5  10 -13  573.68   44.45
   3   1  17    3.87    5.06
   3  -1  17    3.21    4.01
   3 -15 -10   54.56   21.03
   3  15 -10   23.68   18.48
   3   8  15   35.48    9.56
   3  -8  15   51.39   13.39
   7  -9   2  681.74   30.63
   7   9   2  581.67   52.28
   7   0   8    3.95   12.12
   2 -18  -2  412.71   51.82
   2  18  -2  341.33   31.95
   8  -4   0   42.36    9.67
   8   4   0   64.42    8.43
   2  -2  18   41.05   16.33
   2   2  18   56.07   13.07
   3 -12 -14 6355.89  200.00
   3  12 -14 6449.37  202.03
   7   7   5 1200.01   57.74
   7  -7   5 1276.70   54.81
   1  18   4  525.08   44.84
   1 -18   4  448.58   50.83
   2 -17  -7  128.27   27.48
   2  17  -7  182.07   27.13
   3  -1 -19  198.76   44.09
   3   1 -19  190.84   21.54
   5  11 -12   43.67   18.13
   5 -11 -12   40.78   11.40
   3   8 -17  130.86   29.99
   3  -8 -17  260.35   34.06
   4 -14 -10  128.75   31.44
   4  14 -10  115.67   25.38
   6  -3  11  780.26   52.04
   6   3  11  757.18   30.53
   3  16   6   20.44    6.71
   3 -16   6   16.16    8.20
   1   8  17   36.93   10.68
   1  -8  17   65.97   16.82
   4   7  14  402.70   45.33
   4  -7  14  306.39   19.68
   2 -18   1   29.35   10.22
   2  18   1   59.38   17.62
   1 -13 -14   44.84   16.46
   1  13 -14   39.54   11.22
   7   1   8   73.86   20.92
   7  -1   8   46.48    8.68
   2  10  15   11.91   21.87
   2 -10  15    5.15    6.06
   3  16  -8  300.41   43.83
   3 -16  -8  344.81   43.30
   4  16   2  734.10   54.39
   4 -16   2  638.92   46.13
   0 -18   5  337.08   44.12
   0  18   5  448.38   39.26
   4  15  -8   11.95    7.55
   4 -15  -8   20.74   18.85
   4  -3 -18  579.33   60.10
   4   3 -18  537.41   87.02
   2   4 -19   24.29   13.10
   2  -4 -19   38.66   16.75
   2   7 -18  680.04   35.70
   2  -7 -18  773.92   72.55
   3  13  11  861.77   52.81
   3 -13  11  892.60   36.27
   3 -11  13    5.25    6.49
   3  11  13   -1.97    7.38
   8  -2   2  199.42   31.04
   8   2   2  207.21   30.96
   7   6   6 1373.83   87.54
   7  -6   6 1394.42   65.53
   5  -7  12  188.56   42.58
   5   7  12  243.40   43.34
   1 -16 -10  513.61   35.04
   1  16 -10  500.92   49.00
   7  10  -2    5.67    8.74
   7 -10  -2   15.24   10.63
   6   3 -15   72.91   17.90
   6  -3 -15   68.92   11.80
   3 -13 -13 2280.04   78.58
   3  13 -13 2275.40  143.93
   6  11   5   17.68    5.68
   6 -11   5   33.40   19.84
   3  11 -15  260.04   38.68
   3 -11 -15  241.50   48.01
   1  12 -15  143.49   20.23
   1 -12 -15  165.25   22.45
   2   9 -17  160.72   22.00
   2  -9 -17  208.04   41.79
   0  -9  17   16.50   14.69
   0   9  17    0.69    4.51
   0  17   8 1177.63   93.35
   0 -17   8 1138.97   62.03
   7  10  -3  321.25   38.04
   7 -10  -3  405.74   28.68
   3  -6  16   50.00   25.26
   3   6  16   60.06   14.00
   4  13   9  206.83   25.96
   4 -13   9  255.45   29.38
   5  -2 -17  984.54   49.25
   5   2 -17 1003.72   73.42
   0  16  10   90.76   22.35
   0 -16  10   35.01    9.29
   1 -17  -8   59.86   16.21
   1  17  -8   90.36   19.23
   7  -8   4  120.95   17.17
   7   8   4  129.67   17.74
   5   9 -14   19.46   10.32
   5  -9 -14   12.05   12.03
   0   7  18   35.41   13.52
   0  -7  18   45.97   14.28
   3  -2  17  528.44   34.98
   3   2  17  493.12   50.44
   6  11  -9  204.89   36.16
   6 -11  -9  159.53   20.40
   8   5  -3   40.37   19.04
   8  -5  -3   21.57    6.88
   1  15  11  299.49   33.23
   1 -15  11  213.38   41.52
   6 -12   3  922.59   45.74
   6  12   3  863.33   58.24
   5  14  -7  578.10   43.27
   5 -14  -7  549.34   49.44
   8   5  -2   56.26   16.75
   8  -5  -2   45.65   10.14
   3  -6 -18  409.15   45.23
   3   6 -18  326.94   44.94
   7   9  -7  400.49   51.26
   7  -9  -7  356.85   15.51
   3  17   3  463.57   39.80
   3 -17   3  397.15   27.86
   1  18  -5  107.13   24.99
   1 -18  -5  120.26   20.71
   2 -18  -3   97.77   19.20
   2  18  -3   60.18   12.29
   7  10  -1  711.78   21.91
   7 -10  -1  735.32   34.50
   6  12  -7  707.34   32.09
   6 -12  -7  749.02   37.57
   3 -17  -5 1351.53   96.03
   3  17  -5 1467.07   63.35
   5  13   6   17.95   17.58
   5 -13   6    7.29    4.40
   3  -2 -19   -2.08   18.56
   3   2 -19   22.05    9.21
   4  16  -5  183.07   28.28
   4 -16  -5  203.78   32.91
   1 -14 -13  385.45   47.29
   1  14 -13  373.77   32.63
   5   5  13   25.84    7.25
   5  -5  13   15.57    8.88
   0   4  19  121.84   46.07
   0  -4  19   99.53   17.27
   7   2   8  804.24   64.78
   7  -2   8  826.07   35.57
   8  -4  -6   70.76   20.36
   8   4  -6   52.51    9.84
   0  13  14   17.98   11.00
   0 -13  14   26.49   10.26
   8   0  -8  323.32   44.80
   8  -3  -7  143.06   36.64
   8   3  -7  119.50   20.21
   2  17   6    7.83    7.67
   2 -17   6   19.89    8.49
   2  15  10   71.22   20.08
   2 -15  10   50.23    8.83
   8   5  -4   30.41   12.55
   8  -5  -4   39.06   16.36
   7 -10  -4  426.86   18.18
   7  10  -4  479.07   44.55
   1   0  19  218.53   38.60
   6   6  10  962.64   30.15
   6  -6  10 1061.79   50.66
   4 -11 -14  268.35   37.24
   4  11 -14  190.44   29.67
   7  -4 -12   -2.17    4.58
   7   4 -12   21.22   13.14
   2 -18   2 1741.49  110.35
   2  18   2 1677.66   67.88
   6  13  -2  551.91   39.74
   6 -13  -2  650.09   44.24
   8  -5  -1  180.09   22.49
   8   5  -1  272.19   29.35
   2  -3  18  692.61   43.31
   2   3  18  710.75   65.17
   4 -12 -13  436.03   43.69
   4  12 -13  406.86   49.96
   8   1  -8   30.20   12.75
   8  -1  -8    0.44    1.85
   5 -12 -11   64.88   21.43
   5  12 -11   68.67   17.75
   4   9  13 1199.43   57.59
   4  -9  13 1048.17   56.22
   1  -1  19 1306.75   65.33
   1   1  19 1251.79   58.77
   7  -7 -10  322.89   16.92
   7   7 -10  338.11   44.27
   5  15  -2   20.30    9.65
   5 -15  -2   31.12   18.32
   1  10  16   30.40   13.78
   1 -10  16   21.77   11.07
   1  -6  18   51.92   20.59
   1   6  18  120.05   20.63
   6  -6 -14 1322.71   57.72
   6   6 -14 1439.63   91.21
   5 -10  10    8.57    8.18
   5  10  10   40.70   11.90
   8  -4   1    3.12    6.98
   8   4   1    5.48    3.33
   5  15  -1  144.31   21.55
   5 -15  -1  159.23   28.56
   5  14   4   37.89   10.30
   5 -14   4    5.62    6.91
   6 -13  -1  413.13   35.79
   6  13  -1  307.91   51.26
   6  13  -3  157.70   26.67
   6 -13  -3  255.63   32.84
   4   5  15  183.15   21.78
   4  -5  15  196.74   29.71
   0  12  15  146.10   19.45
   0 -12  15  128.97   27.34
   5 -11   9   42.39   14.01
   5  11   9   32.20   13.91
   0 -14  13    7.69    3.52
   0  14  13   21.13   14.63
   1  -5 -19  316.00   38.87
   1   5 -19  250.54   23.35
   8  -3   2  494.25   32.48
   8   3   2  490.08   25.75
   7  10   0   61.32   14.48
   7 -10   0   29.07   11.54
   5   0  14    3.06    5.10
   7   5   7   60.34   12.94
   7  -5   7   70.36   13.84
   5   6 -16  590.28   78.62
   5  -6 -16  671.42   38.06
   8   0   3    3.18    5.30
   1  11 -16   26.18    9.29
   1 -11 -16   45.12   16.21
   5 -15  -3    1.26   18.39
   5  15  -3   29.00   12.92
   3  14  10  219.03   31.75
   3 -14  10  221.70   40.36
   3  10  14  361.25   17.78
   3 -10  14  313.27   41.36
   7   8  -9 1318.18   65.92
   7  -8  -9 1156.67   46.40
   5   3 -17   48.95   12.63
   5  -3 -17   31.40   20.17
   7   0 -13  179.78   24.97
   3  -3  17  549.32   32.11
   3   3  17  531.00   47.63
   3 -14 -12   51.28   16.97
   3  14 -12   16.35   11.55
   6   4  11   53.33   11.15
   6  -4  11   60.39   12.91
   7   6 -11   29.37   32.38
   7  -6 -11    4.40    6.17
   5  -1  14  519.29   44.05
   5   1  14  577.52   18.12
   8   5  -5   26.16    8.25
   8  -5  -5   17.41    7.21
   2 -13 -14 1655.77   87.16
   2  13 -14 1652.78   82.89
   3 -10 -16   -6.04   15.59
   3  10 -16   39.79   11.80
   8   1   3   29.10    8.76
   8  -1   3   61.80   11.54
   5 -15   0   79.20   18.07
   5  15   0  119.61   23.95
   4 -10 -15   37.07   12.45
   4  10 -15   17.01   17.66
   4  16   3  170.48   29.36
   4 -16   3  125.94   24.18
   4  -4 -18 2310.47   80.20
   4   4 -18 2271.35  103.21
   8  -2  -8    3.32    6.23
   8   2  -8   14.68    9.11
   2  12 -15  512.96   63.69
   2 -12 -15  603.71   66.41
   1   2  19  101.78   22.87
   1  -2  19   57.59   15.80
   3   3 -19   32.99   13.24
   3  -3 -19    3.37   14.31
   7  10  -5   98.99   19.95
   7 -10  -5  123.64   15.14
   7   1 -13  353.96   51.15
   7  -1 -13  288.53   26.59
   2  18  -4   82.59   21.35
   2 -18  -4  141.64   32.79
   6 -13   0  400.99   29.93
   6  13   0  380.27   36.00
   7   9   3   18.53    8.80
   7  -9   3    8.34    4.34
   6  13  -4  299.54   60.15
   6 -13  -4  432.55   42.76
   6   4 -15   68.64   24.32
   6  -4 -15   94.04   17.44
   7   3   8  218.43   27.88
   7  -3   8  232.57   37.22
   8   5   0    1.25    1.98
   8  -5   0   10.35    8.42
   6  -9   8   20.15    7.60
   6   9   8   57.60   17.08
   5   9  11  855.90   48.05
   5  -9  11  761.80   38.16
   5  -8 -15  250.47   29.76
   5   8 -15  111.27   26.81
   1 -18   5  556.54   63.65
   1  18   5  629.11   43.41
   4  15   6   62.11   11.43
   4 -15   6   92.32   17.18
   4  13 -12  109.37   20.48
   4 -13 -12  166.41   27.99
   6   9 -12  614.62   51.54
   6  -9 -12  602.28   45.74
   1 -15 -12   52.65   16.87
   1  15 -12   25.23   10.84
   2  -5 -19   49.66   19.74
   2   5 -19   32.88    7.93
   5  12   8   43.69   20.93
   5 -12   8   31.84    8.20
   6  10   7  291.86   41.77
   6 -10   7  246.61   31.29
   5 -15  -4  230.97   40.01
   5  15  -4  310.92   43.10
   2  18   3   20.16    7.62
   2 -18   3   31.80   12.67
   5   2  14  100.66   19.23
   5  -2  14  108.62   21.35
   8   2   3   14.94    6.66
   8  -2   3   17.16    8.30
   2  16 -10  325.62   39.92
   2 -16 -10  356.14   45.65
   2 -14 -13  539.29   69.56
   2  14 -13  551.17   69.39
   4 -14   8  146.08   22.11
   4  14   8   84.03   18.87
   4  16  -6   53.97   11.64
   4 -16  -6   43.68   33.35
   8   4  -7  303.18   33.72
   8  -4  -7  340.18   46.02
   4  -7 -17   53.82   17.88
   4   7 -17   30.46   17.67
   0  18   6  -10.50   16.22
   0 -18   6   36.47   15.12
   6 -10 -11 2124.06   71.62
   6  10 -11 2087.55   73.49
   6  -8   9   16.74    7.21
   6   8   9   34.86    8.88
   2   7  17 1284.58   77.93
   2  -7  17 1408.50   96.01
   7   2 -13  119.59   17.55
   7  -2 -13  157.53   20.73
   3 -17   4    5.97   15.07
   3  17   4    3.68    5.86
   0 -11  16  143.93   25.47
   0  11  16   89.04   13.33
   1   8 -18  284.76   33.51
   1  -8 -18  305.71   33.69
   3  17  -6   45.89   25.30
   3 -17  -6   36.49   18.07
   2  -9  16   76.51   21.66
   2   9  16  121.10   23.16
   7 -10   1  316.56   26.22
   7  10   1  315.60   43.93
   5  15   1  111.64   23.37
   5 -15   1  100.06   25.27
   2   4  18  140.73   24.90
   2  -4  18  100.05   20.30
   4   0  16 1921.19  101.36
   0  15  12  291.36   36.35
   0 -15  12  231.66   29.25
   1  17   8   59.53   22.95
   1 -17   8   25.33    7.95
   6  -8 -13    7.44    3.81
   6   8 -13   37.95   16.29
   0   5  19  262.15   36.61
   0  -5  19  202.45   33.16
   7   9  -8  223.15   42.21
   7  -9  -8  178.20   19.48
   1 -18  -6   31.30   19.21
   1  18  -6   21.03   11.72
   2 -11 -16  297.75   31.86
   2  11 -16  363.72   32.55
   6 -12   4   11.94    5.79
   6  12   4   -2.99    7.32
   8  -5  -6   72.12   19.61
   8   5  -6   57.39    9.22
   2 -17  -8  872.45   65.82
   2  17  -8  769.68   52.37
   4   1  16  107.28   18.17
   4  -1  16  124.26   19.41
   6  13   1 1838.34   79.59
   6 -13   1 1848.79   70.54
   8  -3  -8  143.23   49.57
   8   3  -8  181.72   24.84
   8   4   2   38.43    7.74
   8  -4   2   53.35   12.12
   1   3  19 2006.54   74.18
   1  -3  19 1898.01   62.95
   6  13  -5  996.16   37.61
   6 -13  -5 1088.55   63.62
   6 -12  -8  111.29   20.01
   6  12  -8  151.70   23.17
   7   5 -12   40.56   19.13
   7  -5 -12    9.85    2.92
   1  16  10  796.61   34.94
   1 -16  10  846.77   28.75
   8   6  -3  475.58   30.61
   8  -6  -3  474.07   43.40
   5  14  -8   98.33   20.79
   5 -14  -8  112.54   24.96
   5 -13 -10  135.89   34.93
   5  13 -10  144.86   19.71
   8  -6  -2  212.05   27.87
   8   6  -2  308.68   26.98
   5  -4 -17 1283.04   95.66
   5   4 -17 1390.36   80.67
   7 -10  -6    2.12    3.91
   7  10  -6   11.78   11.85
   7  -7   6   12.59    7.64
   7   7   6   16.74    9.60
   4  15  -9    9.33    7.56
   4 -15  -9   42.95   14.48
   3  16   7 3339.21  104.95
   3 -16   7 3419.09  122.04
   3   4  17   16.22    6.52
   3  -4  17    4.48   13.85
   5  -6  13  977.35   31.92
   5   6  13  892.94   35.33
   8  -5   1   16.47    7.75
   8   5   1    8.76    6.07
   3 -16  -9  215.01   35.31
   3  16  -9  192.25   45.72
   0 -19   0    4.21   16.77
   0  19   0  -32.18   25.52
   7  -8   5   34.46    8.14
   7   8   5   17.84    8.09
   8   0  -9   58.03   22.29
   4   9 -16  539.21   60.60
   4  -9 -16  469.43   53.57
   3  -7  16 1712.00  102.82
   3   7  16 1690.78   85.70
   8  -6  -4  164.70   25.28
   8   6  -4  181.09   25.17
   3   4 -19  705.29   44.95
   3  -4 -19  761.60   46.84
   2  18  -5  477.05   37.18
   2 -18  -5  496.26   66.80
   5   3  14  408.96   43.95
   5  -3  14  342.51   27.94
   2  13  13  333.36   48.37
   2 -13  13  297.79   30.10
   4  -8  14   51.83   15.77
   4   8  14   85.11   22.58
   6 -11   6  306.09   19.76
   6  11   6  234.14   31.00
   5 -15  -5   50.22   13.75
   5  15  -5   17.04    5.99
   7  -4   8   33.63   10.96
   7   4   8   15.92    6.47
   8   3   3  149.08   19.23
   8  -3   3  111.54   26.51
   0  19   1  114.97   25.93
   0 -19   1   53.73   21.60
   1 -10 -17  153.55   28.00
   1  10 -17  130.98   17.20
   8   6  -1  374.68   47.08
   8  -6  -1  302.23   43.40
   8  -1  -9    1.37    3.81
   8   1  -9   -0.69    2.82
   3   7 -18  938.15   49.54
   3  -7 -18 1062.66  105.43
   4  -2  16 2161.11   81.01
   4   2  16 2198.42   59.48
   2  -8 -18  758.39   45.26
   2   8 -18  702.65   36.94
   2 -16   9   48.40   16.61
   2  16   9  106.12   29.50
   7  -3 -13   31.52    8.27
   7   3 -13   57.56   13.29
   5  -8  12   18.22   17.76
   5   8  12    4.82   14.95
   6   0  12 1301.69   66.80
   6 -11 -10   11.30    4.67
   6  11 -10   24.18   11.48
   6   5  11   13.87    6.50
   6  -5  11   10.93    6.39
   3 -15   9  102.57   24.42
   3  15   9  131.62   29.19
   1   0 -20    4.26   10.65
   3   9  15   87.51   23.98
   3  -9  15  161.59   31.91
   2  12  14 1101.89   80.86
   2 -12  14 1132.68   50.64
   4   6  15   97.35   18.07
   4  -6  15  114.72   30.81
   4  16   4   15.35    8.79
   4 -16   4   16.61    4.83
   3 -15 -11  284.14   33.51
   3  15 -11  164.45   31.82
   4  -5 -18  139.84   25.85
   4   5 -18  183.66   32.51
   5  14   5   16.42    7.99
   5 -14   5   13.33    7.69
   1   6 -19   86.75   11.23
   1  -6 -19   57.40   32.76
   2  17   7  627.39   33.05
   2 -17   7  600.54   48.21
   0  -8  18   25.15   12.37
   0   8  18   40.75   11.65
   3   9 -17   31.50   15.62
   3  -9 -17   17.11   13.29
   6  -1  12  218.07   33.71
   6   1  12  231.78   47.03
   6   7  10 1858.28   84.89
   6  -7  10 1770.27   59.06
   1  17  -9 1633.65  100.08
   1 -17  -9 1777.59  112.78
   4  14 -11   52.57   18.67
   4 -14 -11   10.00   13.49
   1   9  17   76.22   18.89
   1  -9  17   61.55   11.61
   5  15   2   44.48   20.12
   5 -15   2   40.84   13.03
   7  -6   7   49.18   10.70
   7   6   7   39.00   14.63
   1   1 -20  530.36   54.39
   1  -1 -20  537.93   45.30
   6   5 -15  873.13   62.37
   6  -5 -15  890.25   29.33
   6   0 -16  363.09   49.54
   1 -13  14  146.97   21.20
   1  13  14  155.18   27.45
   0  17   9    5.83   24.84
   0 -17   9   33.35   18.72
   2  15 -12 1966.59   75.46
   2 -15 -12 2128.14   81.91
   8   0   4 1014.95   34.06
   2  18   4  457.42   40.83
   2 -18   4  408.49   47.38
   2 -14  12 1181.02   48.40
   2  14  12 1234.31   68.00
   5  13   7   42.38   17.98
   5 -13   7    8.73    9.18
   1   7  18   30.17    9.60
   1  -7  18   28.31   18.49
   6  -7 -14  100.74   14.70
   6   7 -14   79.11   29.99
   0  19   2  116.21   26.04
   0 -19   2  126.84   26.60
   8   6  -5 1945.31   60.50
   8  -6  -5 1893.31   62.47
   6  -1 -16  115.16   23.42
   6   1 -16   76.35   21.91
   7  10   2  541.22   24.02
   7 -10   2  496.46   43.16
   8  -2  -9   19.08    7.49
   8   2  -9   41.12   10.73
   4 -12  11  237.50   27.99
   4  12  11  285.14   32.07
   8   1   4   61.35   11.21
   8  -1   4   35.15   11.74
   1  14  13   65.69   13.28
   1 -14  13   82.89    9.54
   7   9   4 1276.57   75.13
   7  -9   4 1281.15   51.06
   6  13   2  408.13   51.15
   6 -13   2  390.40   37.47
   4 -11  12   80.88   12.01
   4  11  12   78.45   17.73
   7   0   9 1948.61  104.37
   5  -7 -16  145.60   23.76
   5   7 -16   82.54   16.43
   8  -6   0   82.03   16.23
   8   6   0   37.57    7.07
   6 -13  -6  235.12   41.17
   6  13  -6  200.95   21.34
   2   0 -20  898.98   44.36
   1 -18   6  261.04   45.55
   1  18   6  279.37   43.78
   1  19   0  928.63   54.09
   1 -19   0  894.41   34.50
   8   4  -8   32.70    9.39
   8  -4  -8   62.37   15.79
   8  -5  -7   49.75   17.41
   8   5  -7   55.96   14.20
   1 -12  15  130.78   20.05
   1  12  15   88.60   14.13
   1  16 -11   37.25   12.58
   1 -16 -11   32.36   14.08
   1  -4  19  283.16   50.58
   1   4  19  389.59   43.49
   1 -19  -1  828.76   47.63
   1  19  -1  756.90   43.00
   7   8 -10   36.43   10.00
   7  -8 -10   12.64    4.91
   6   2  12 1170.99   61.86
   6  -2  12 1061.01   41.06
   5 -11 -13  156.40   34.32
   5  11 -13  171.57   33.79
   7  -7 -11  125.61   29.80
   7   7 -11  105.60   37.22
   1   2 -20   73.89   16.32
   1  -2 -20   87.23   20.93
   4 -16  -7  774.90   58.04
   4  16  -7  662.42   41.45
   7   1   9   12.48   15.23
   7  -1   9   13.14    9.93
   2   5  18  183.69   23.34
   2  -5  18  249.24   58.52
   2   1 -20   42.57   14.09
   2  -1 -20   70.88   24.01
   4   3  16   14.59    7.39
   4  -3  16   20.86   15.27
   2  10 -17  135.10   21.83
   2 -10 -17  154.44   23.99
   0 -10  17   48.85   14.42
   0  10  17   53.06    8.97
   2   6 -19  502.12   29.94
   2  -6 -19  557.32   67.25
   5  10 -14  236.13   38.06
   5 -10 -14  149.10   39.43
   3 -17   5   -0.08    7.34
   3  17   5    8.12    8.29
   1 -19   1   51.61   13.11
   1  19   1   51.61   13.39
   6  -2 -16  646.36   53.26
   6   2 -16  641.04   50.86
   0 -16  11  280.73   30.62
   0  16  11  258.82   33.22
   2  11  15   54.05   22.04
   2 -11  15    1.58    2.60
   3  17  -7   44.30   12.08
   3 -17  -7   37.77   14.33
   7 -10  -7   50.70   10.35
   7  10  -7   81.52   27.40
   8   2   4   12.81    6.01
   8  -2   4   17.74   12.98
   4  13  10   95.33   27.35
   4 -13  10  122.38   40.92
   8   5   2  521.74   33.91
   8  -5   2  502.97   37.35
   1  19  -2   11.40   15.95
   1 -19  -2   13.02   14.83
   5  -4  14  191.84   25.97
   5   4  14  230.98   25.09
   7 -11  -2    9.29   10.19
   7  11  -2    3.45   12.22
   8  -4   3  146.04   33.30
   8   4   3  189.52   24.18
   5  15  -6  806.34   21.52
   5 -15  -6  813.10   40.99
   7 -11  -3   48.85   13.29
   7  11  -3   60.78   13.25
   0 -18   7   53.20   17.19
   0  18   7  127.14   32.97
   0  19   3   35.48   20.62
   0 -19   3   38.25   15.68
   5  -5 -17  283.88   49.97
   5   5 -17  273.61   49.55
   7   4 -13  347.30   43.45
   7  -4 -13  308.08   31.48
   3  18  -1  170.69   27.82
   3 -18  -1  213.63   43.80
   5 -12 -12   25.73   19.46
   5  12 -12   -6.62   17.74
   3   5  17  236.43   30.51
   3  -5  17  290.36   44.43
   0  -6  19   17.71   21.28
   0   6  19   58.93   21.92
   0   0  20  352.99   47.04
   4  15   7    3.41    7.12
   4 -15   7    8.95    4.85
   7  -2   9   43.52   13.61
   7   2   9   36.72    8.25
   4   0 -19   41.37   12.60
   4  17  -1   10.76    4.24
   4 -17  -1   10.49   22.85
   8  -3  -9  153.27   34.62
   8   3  -9  142.96   26.16
   8  -6  -6  542.12   63.53
   8   6  -6  627.21   38.35
   2  -2 -20 2462.80  112.41
   2   2 -20 2425.52   96.91
   7   9  -9  515.08   33.84
   7  -9  -9  412.33   23.78
   1  18  -7 1327.79   66.72
   1 -18  -7 1358.56   62.40
   7  11  -1   25.37    8.99
   7 -11  -1    9.34    9.27
   4 -17  -2  507.46   69.22
   4  17  -2  516.41   18.27
   4  10  13   31.09    9.92
   4 -10  13   30.29   15.74
   3  12  13  100.27   21.83
   3 -12  13   83.69   15.61
   3 -18   0   28.48   10.12
   3  18   0   23.02    8.04
   3  13  12  625.45   55.58
   3 -13  12  629.09   61.70
   3  -5 -19   34.85    9.20
   3   5 -19   50.39   20.41
   3  18  -2  499.15   51.10
   3 -18  -2  590.98   39.02
   1 -15  12   87.90   13.31
   1  15  12  113.77   23.61
   2 -18  -6   37.87   17.00
   2  18  -6   20.59   16.53
   7  -6 -12    9.16    4.68
   7   6 -12   21.61   19.73
   0  -1  20 2974.67   92.60
   0   1  20 3065.84   91.88
   2  15  11  185.70   31.28
   2 -15  11  121.29   13.39
   7   5   8   24.50    8.53
   7  -5   8   32.58   11.82
   4   1 -19   55.12   20.79
   4  -1 -19   63.65   18.24
   6  12   5  946.40   43.58
   6 -12   5 1116.50   72.31
   3 -12 -15   53.02   18.80
   3  12 -15   22.55   11.83
   3  13 -14   81.71   22.28
   3 -13 -14  104.12   23.71
   1  19   2   49.54   23.42
   1 -19   2   42.76   21.60
   5 -15   3  193.59   30.04
   5  15   3  244.19   42.48
   7 -11  -4  387.64   33.84
   7  11  -4  309.39   36.49
   4 -17   0   47.13   23.83
   4  17   0   70.36   23.85
   6   3  12  147.78   20.37
   6  -3  12  117.14   20.79
   6 -12  -9   -2.19    6.50
   6  12  -9   22.89   11.62
   1   3 -20 1859.44   88.86
   1  -3 -20 1805.86   59.78
   8   6   1   30.38    7.43
   8  -6   1   12.89    6.17
   5   9 -15  427.58   40.68
   5  -9 -15  391.28   42.04
   4  -8 -17   31.97   17.49
   4   8 -17   -0.40   15.22
   5 -14  -9  307.09   29.39
   5  14  -9  311.82   38.45
   2   8  17   54.04   12.79
   2  -8  17   38.37   11.70
   4  17  -3    9.92    4.83
   4 -17  -3   17.60   18.72
   1 -11  16   98.76   14.38
   1  11  16   68.92   15.88
   1 -19  -3  116.86   21.70
   1  19  -3  134.52   23.45
   8   7  -3  130.35   22.02
   8  -7  -3   98.88   15.09
   5 -11  10  130.10   25.74
   5  11  10  175.44   31.27
   6  -3 -16   14.76   10.58
   6   3 -16   13.74   10.37
   8   7  -2   16.58   12.46
   8  -7  -2   15.66    8.96
   1  13 -15   82.60   15.12
   1 -13 -15   22.09   15.33
   3  18   1   30.19    8.78
   3 -18   1   24.26   10.76
   8  -3   4  140.96   29.37
   8   3   4  131.55   20.55
   3 -18  -3  559.51   55.80
   3  18  -3  415.29   26.75
   2  17  -9  165.91   43.87
   2 -17  -9  181.93   38.33
   4 -12 -14   18.92   14.43
   4  12 -14    8.08   17.89
   6   6  11  416.05   34.89
   6  -6  11  470.16   35.67
   7  11   0   29.34    8.35
   7 -11   0   35.04   11.02
   5   0 -18  -25.18   16.90
   5   7  13  197.98   40.81
   5  -7  13  128.91   32.22
   7 -10   3  283.31   33.94
   7  10   3  285.91   32.98
   8   0 -10   62.24   23.15
   0   2  20  325.93   41.08
   0  -2  20  280.19   30.54
   4  16   5   15.72    7.63
   4 -16   5   30.82    7.42
   2  18   5   15.27    8.47
   2 -18   5   13.31    9.23
   1  14 -14  409.45   51.46
   1 -14 -14  447.95   70.45
   6  13   3  157.45   27.11
   6 -13   3  138.06   31.12
   4  -2 -19  159.61   30.14
   4   2 -19   84.57   38.31
   6  10   8  388.62   44.92
   6 -10   8  367.65   31.82
   4  -4  16  877.75   50.08
   4   4  16  902.77   44.53
   3  11  14    6.77    5.00
   3 -11  14    1.69    6.84
   7   0 -14    8.49    9.25
   4  -6 -18  688.49   80.24
   4   6 -18  859.68   47.25
   5 -10  11  120.39   17.08
   5  10  11  164.95   33.93
   8  -7  -4  378.54   51.44
   8   7  -4  424.50   41.66
   3  14  11  783.68   53.58
   3 -14  11  780.98   29.98
   6   9   9  290.81   42.45
   6  -9   9  239.53   30.43
   6 -13  -7  554.85   43.67
   6  13  -7  510.98   25.32
   1  17   9   57.55   28.85
   1 -17   9   61.80   10.75
   5  -1 -18   91.36   23.49
   5   1 -18   97.23   22.41
   1   9 -18   12.99    6.37
   1  -9 -18   28.55   16.44
   8  -1 -10   10.59    5.82
   8   1 -10   14.51    8.58
   7   3   9   69.58   19.44
   7  -3   9   45.65   11.21
   6  -6 -15  131.93   17.02
   6   6 -15  116.21   30.90
   3 -11 -16   53.03   17.95
   3  11 -16  -19.74   17.06
   4  17   1   35.88   13.03
   4 -17   1   40.05   19.58
   3 -14 -13 1430.71   67.34
   3  14 -13 1289.18   64.27
   6 -10 -12 1313.04   73.11
   6  10 -12 1497.16  116.36
   4  11 -15   42.11   13.94
   4 -11 -15   60.50   16.94
   8   7  -1    0.26    3.27
   8  -7  -1    7.97    6.35
   2   3 -20   10.84    7.81
   2  -3 -20   30.35   15.17
   2 -16 -11  171.58   43.26
   2  16 -11  201.97   37.33
   5 -12   9   22.14    6.73
   5  12   9   67.17   20.11
   7   1 -14   46.59    8.50
   7  -1 -14   83.81   12.72
   8   5  -8   12.82    6.23
   8  -5  -8   16.52   11.42
   4 -14   9   18.96    9.93
   4  14   9   37.43   12.35
   6   9 -13  163.35   30.35
   6  -9 -13  175.31   33.19
   1   5  19 2184.45   92.36
   1  -5  19 2167.48   88.53
   7 -11  -5   94.23   18.50
   7  11  -5   82.95   21.98
   7  -8   6   18.55    6.31
   7   8   6    7.47    7.33
   4  15 -10  809.18   56.07
   4 -15 -10  819.08   67.28
   0  19   4  328.95   40.04
   0 -19   4  310.28   32.23
   4   7  15 1032.75   71.78
   4  -7  15 1051.10   68.93
   1 -12 -16  830.56   56.99
   1  12 -16  645.86   58.16
   4 -13 -13  405.94   59.18
   4  13 -13  403.46   44.66
   3  16   8   13.73   12.47
   3 -16   8   35.92    6.96
   3   8  16  224.39   35.82
   3  -8  16  262.66   47.03
   5  13 -11  357.79   44.66
   5 -13 -11  390.26   47.13
   1 -19   3  142.02   31.47
   1  19   3  154.85   31.63
   1  -7 -19 2207.39   99.51
   1   7 -19 2220.73   67.98
   5  14   6  924.79   69.53
   5 -14   6 1049.08   69.43
   4  17  -4  269.95   34.51
   4 -17  -4  223.70   44.84
   3 -16 -10  201.32   40.94
   3  16 -10  149.00   19.82
   2 -10  16   31.25    8.95
   2  10  16   64.18   23.78
   7   7   7   38.00    7.93
   7  -7   7   28.37   10.17
   0  13  15   63.24   18.47
   0 -13  15  113.34   16.42
   8  -4  -9 1453.49   87.98
   8   4  -9 1355.34   67.55
   3   8 -18  573.94   62.09
   3  -8 -18  730.06   54.27
   0  14  14  337.05   48.91
   0 -14  14  259.66   22.60
   8  -6  -7   17.44    9.28
   8   6  -7   22.58    9.33
   8   0   5   20.51    7.23
   2   0  19    2.14    3.47
   6  11   7  237.97   46.52
   6 -11   7  183.88   26.56
   5   2 -18   38.75   11.40
   5  -2 -18   60.49   20.61
   5   5  14  536.39   40.49
   5  -5  14  576.61   29.63
   7 -10  -8  957.33   26.64
   7  10  -8 1003.77   53.52
   8  -2 -10   71.03   12.17
   8   2 -10   40.81   12.80
   8  -7  -5  414.81   34.33
   8   7  -5  509.75   35.54
   3  18   2   39.98   12.10
   3 -18   2   42.38   12.96
   8   5   3  102.68   22.79
   8  -5   3  102.85   10.43
   3  18  -4   17.22    7.68
   3 -18  -4    0.23   40.62
   5 -15  -7  386.87   46.80
   5  15  -7  363.33   34.05
   6 -14  -2  163.91   23.05
   6  14  -2  123.33   37.39
   2   6  18  159.53   22.92
   2  -6  18  165.24   31.41
   7  -9   5  581.10   18.57
   7   9   5  637.85   39.32
   4 -16  -8   33.22   14.29
   4  16  -8   55.44   19.55
   7  -2 -14  170.95   24.19
   7   2 -14  124.94   27.22
   6 -11 -11  286.19   29.74
   6  11 -11  340.81   40.43
   8   1   5   41.83    9.85
   8  -1   5   30.85   33.26
   2  -1  19    7.97    7.58
   2   1  19   12.77    7.37
   1 -15 -13 2560.40   87.38
   1  15 -13 2583.57   83.24
   7  -5 -13  445.96   26.27
   7   5 -13  387.77   52.07
   1  19  -4  353.19   40.46
   1 -19  -4  318.45   33.79
   2  17   8  284.06   47.94
   2 -17   8  167.58   19.98
   6  -4  12   27.95   10.64
   6   4  12   25.66    9.52
   6   8  10 1202.51   89.62
   6  -8  10 1192.69   67.42
   1 -18   7  507.14   32.65
   1  18   7  496.48   36.48
   4  -9  14   65.30   11.71
   4   9  14   82.62   30.02
   1   4 -20    6.75    4.47
   1  -4 -20   62.17   25.69
   0  -3  20 2614.87  145.44
   0   3  20 2692.61   88.62
   3   0  18    4.31    4.46
   7  11   1 1492.05   64.95
   7 -11   1 1504.37   84.87
   6  14  -1  108.41   36.66
   6 -14  -1  163.87   34.25
   4   3 -19   17.41   15.76
   4  -3 -19   53.81   15.76
   8  -7   0  343.96   31.49
   8   7   0  356.79   36.05
   6 -14  -3  202.41   34.38
   6  14  -3  157.18   58.76
   2  -9 -18   69.25   16.28
   2   9 -18    5.42    8.77
   2 -13 -15  165.15   27.53
   2  13 -15  167.52   28.69
   8  -6   2  728.12   40.15
   8   6   2  773.17   40.66
   5   9  12   69.93   18.85
   5  -9  12   19.97    8.44
   1   8  18   14.21   12.28
   1  -8  18   20.20   10.89
   3  17   6   74.75   15.26
   3 -17   6   93.78   18.67
   3   0 -20   45.83   15.24
   6  -8 -14 1181.49   74.83
   6   8 -14 1287.71   69.70
   1  16  11  216.09   52.26
   1 -16  11  194.81   18.59
   3  -1  18   38.90   23.37
   3   1  18    1.76    9.52
   6   4 -16  320.27   41.65
   6  -4 -16  317.29   33.39
   3 -17  -8  427.94   44.05
   3  17  -8  365.63   40.23
   4 -17   2   12.65    6.88
   4  17   2    6.03   13.03
   4  10 -16 2929.82   92.95
   4 -10 -16 2988.70   94.49
   2  -7 -19   65.04   28.77
   2   7 -19   66.14   12.97
   8   4   4   63.42   13.26
   8  -4   4   77.81   16.00
   5  -6 -17 2472.21  100.35
   5   6 -17 2508.75  104.28
   0   9  18  225.61   46.52
   0  -9  18  268.14   46.03
   1 -17 -10   79.12   16.21
   1  17 -10   43.47   10.98
   3   6  17  109.17   22.43
   3  -6  17  126.00   22.38
   0 -12  16  114.10   24.39
   0  12  16  115.08   15.80
   3   1 -20   10.24   18.28
   3  -1 -20    9.08   18.33
   2 -14 -14  316.08   41.71
   2  14 -14  292.18   35.80
   5 -15   4  623.78   54.81
   5  15   4  565.48   53.39
   5   8 -16   73.64   19.07
   5  -8 -16  113.33   23.81
   0  15  13   68.30   25.49
   0 -15  13   75.59   13.61
   2  16  10  615.58   44.01
   2 -16  10  514.49   33.03
   2 -19  -1  128.36   50.34
   2  19  -1  157.30   23.60
   7  11  -6  456.13   63.22
   7 -11  -6  430.95   31.58
   5 -13   8  262.20   37.08
   5  13   8  315.57   53.04
   2  18  -7  475.45   46.77
   2 -18  -7  528.31   53.31
   8   2   5   26.88    8.74
   8  -2   5   12.03   11.97
   3   6 -19  674.12   48.60
   3  -6 -19  762.28   49.91
   0 -17  10  202.55   29.60
   0  17  10  158.12   19.35
   2  -2  19    8.17    8.56
   2   2  19   18.67    6.84
   6  14   0   38.34   11.88
   6 -14   0   13.25    8.69
   2  19   0  212.96   35.37
   2 -19   0  293.20   37.83
   7   8 -11  114.71   23.84
   7  -8 -11  129.27   17.98
   3 -10  15 1085.71   91.24
   3  10  15 1012.10   60.04
   6  14  -4  914.72  134.24
   6 -14  -4  965.82   61.31
   2 -12 -16   98.39   23.44
   2  12 -16   67.44   19.75
   7  -4   9 2126.32   72.80
   7   4   9 1911.94   57.75
   7  -6   8   30.14   12.56
   7   6   8   17.68    7.54
   2   4 -20  511.45   46.63
   2  -4 -20  438.61   34.79
   3 -15  10  902.52   53.00
   3  15  10  847.83   57.80
   4 -14 -12   59.41   17.65
   4  14 -12   55.77   15.31
   4 -17  -5   62.22   21.59
   4  17  -5   99.19   16.35
   5 -16  -2   47.46   19.24
   5  16  -2   11.66   14.27
   5   0  15 1054.66   82.84
   3 -10 -17  131.93   35.73
   3  10 -17  163.64   26.72
   3 -15 -12  315.15   49.78
   3  15 -12  286.72   29.46
   5   3 -18  145.07   24.47
   5  -3 -18  166.73   31.05
   1  10  17   -0.90    8.03
   1 -10  17   18.30   11.69
   0   7  19   33.28   17.33
   0  -7  19   52.93   20.66
   8  -3 -10   21.17   13.87
   8   3 -10   11.22    5.03
   3  -2  18  346.61   37.36
   3   2  18  381.77   29.39
   5  16  -1   89.30   21.27
   5 -16  -1   37.90   16.46
   2  19  -2 1302.95   80.31
   2 -19  -2 1325.54   74.68
   1  11 -17  158.09   20.66
   1 -11 -17  175.31   32.52
   8   7  -6   61.53   15.00
   8  -7  -6    3.98    8.78
   4   5  16   43.83   11.38
   4  -5  16   31.49   20.04
   0 -18   8 1479.14   70.26
   0  18   8 1724.00   83.25
   7  -3 -14 1323.42   54.61
   7   3 -14 1259.30   80.04
   1 -19   4   43.73   13.86
   1  19   4    7.91   15.57
   1 -18  -8   39.28   12.05
   1  18  -8   50.87   15.11
   7   9 -10   18.43   12.27
   7  -9 -10   21.46   10.17
   5  -1  15    6.46    4.35
   5   1  15    2.06    8.26
   7  -7 -12  351.99   25.64
   7   7 -12  406.27   52.04
   3  -2 -20    7.83    9.68
   3   2 -20   29.95   15.52
   2 -19   1 1535.52   91.29
   2  19   1 1422.19   64.94
   6  13   4  426.26   43.68
   6 -13   4  395.55   50.47
   5  16  -3  123.61   28.97
   5 -16  -3  103.58   24.12
   0 -19   5   10.48   10.78
   0  19   5   12.23   16.85
   3 -18   3  309.84   29.02
   3  18   3  300.31   28.38
   3 -18  -5   51.11   38.40
   3  18  -5    4.79    7.46
   7  10   4  145.10   23.26
   7 -10   4   93.66   32.39
   6  13  -8  430.12   33.47
   6 -13  -8  462.07   36.13
   8   7   1   31.73    7.26
   8  -7   1   17.39    6.10
   6 -12   6  148.04   40.63
   6  12   6  158.23   44.89
   5  16   0  836.41   49.86
   5 -16   0  973.21   75.01
   2  18   6   23.19    9.55
   2 -18   6   10.74    5.78
   6  12 -10 2831.38   94.68
   6 -12 -10 2640.69  112.68
   0   4  20 1283.29   80.99
   0  -4  20 1260.89   81.87
   7 -11   2  167.67   23.08
   7  11   2  121.40   30.19
   4   4 -19  242.25   49.23
   4  -4 -19  306.79   29.12
   2 -15 -13   38.58   12.72
   2  15 -13   29.95   13.38
   8   5  -9  174.50   26.15
   8  -5  -9  205.89   32.23
   4 -15   8   48.38   10.34
   4  15   8   24.19   10.95
   6 -14   1  225.67   34.91
   6  14   1  226.55   35.01
   8   6  -8  551.84   70.69
   8  -6  -8  529.92   73.45
   1 -19  -5  303.54   34.53
   1  19  -5  280.86   35.77
   2 -19  -3  148.57   41.78
   2  19  -3  142.85   25.99
   4  16   6  347.52   28.66
   4 -16   6  333.17   35.30
   8  -3   5  169.82   31.56
   8   3   5  142.95   18.27
   1  -6  19  436.32   41.49
   1   6  19  338.90   45.55
   2   3  19   21.98   11.36
   2  -3  19   43.85    9.69
   6 -14  -5  280.51   44.00
   6  14  -5  312.12   50.35
   5   2  15 1915.80   57.99
   5  -2  15 1952.69  104.46
   6   7  11  142.29   20.82
   6  -7  11  136.45   24.48
   5 -14 -10   12.38   16.86
   5  14 -10   21.59    9.83
   1 -16 -12 1088.03   61.32
   1  16 -12 1034.70   70.79
   1   0  20    7.95    4.12
   4  17   3   37.09   14.66
   4 -17   3   13.89    7.29
   4   7 -18  291.59   33.10
   4  -7 -18  301.55   36.98
   5 -16  -4  181.64   32.54
   5  16  -4  106.91   37.79
   6   5  12  585.26   23.32
   6  -5  12  537.72   60.31
   7   0  10    4.46    8.11
   8  -8  -3   28.50    8.99
   8   8  -3   20.97    8.57
   1  -5 -20  156.17   34.30
   1   5 -20  209.60   28.11
   2  19   2   96.32   21.64
   2 -19   2  141.64   27.39
   3  -3  18    0.85    5.33
   3   3  18    3.08    7.73
   2 -13  14   17.76    4.50
   2  13  14   57.17   23.22
   6   7 -15  237.84   38.36
   6  -7 -15  192.11   23.34
   8  -8  -2 1236.70   75.22
   8   8  -2 1174.52   60.60
   1  -1  20  195.06   36.92
   1   1  20  156.43   23.36
   2  11 -17   37.13    9.08
   2 -11 -17   58.47   19.43
   0  11  17  128.74   14.84
   0 -11  17  151.59   33.46
   8   0 -11    1.29    2.27
   5 -11 -14   20.13   15.21
   5  11 -14   11.73   16.21
   3   3 -20  129.21   27.33
   3  -3 -20   63.87   23.28
   7  -1  10   65.85   15.70
   7   1  10   65.64   12.45
   5  -8  13   14.10    6.87
   5   8  13   35.06   13.42
   5  -6  14   16.44    8.42
   5   6  14   14.63    7.73
   2 -14  13  171.79   19.94
   2  14  13  253.61   44.79
   5  15  -8   21.61    7.95
   5 -15  -8    6.90   12.96
   4  12  12  733.29   60.51
   4 -12  12  793.89   48.79
   6  -5 -16  406.26   42.49
   6   5 -16  446.98   49.17
   5  16   1   33.13    8.91
   5 -16   1   32.71   10.86
   8   6   3  489.25   83.97
   8  -6   3  450.85   51.30
   0  16  12  129.89   23.38
   0 -16  12  124.34   19.53
   7  11  -7   18.47    9.83
   7 -11  -7   14.52    4.55
   7 -10  -9 1735.65   68.57
   7  10  -9 1802.16   72.73
   8  -5   4   32.48    8.07
   8   5   4   28.48    9.10
   4   9 -17    2.87   18.59
   4  -9 -17   35.80   21.85
   8   1 -11   25.17    9.97
   8  -1 -11   24.74    7.45
   6   0  13   11.70    8.64
   8   8  -4  407.87   38.69
   8  -8  -4  331.67   53.68
   2  -9  17  870.53   47.86
   2   9  17  862.08   87.62
   7   6 -13  694.94   36.34
   7  -6 -13  755.30   32.46
   5 -12 -13 1600.37   64.49
   5  12 -13 1571.55   66.40
   5  -4 -18   32.47   21.38
   5   4 -18   42.22   16.46
   8  -4 -10 1071.04   45.91
   8   4 -10  927.06   74.25
   2 -17 -10  831.15   53.57
   2  17 -10  964.78   48.33
   8   8  -1   44.14    8.50
   8  -8  -1   32.79    9.73
   4  13  11   62.99   17.77
   4 -13  11   67.54   19.29
   4 -17  -6 1063.64   45.84
   4  17  -6 1067.92   43.33
   7  -4 -14   93.70   13.59
   7   4 -14  105.53   28.68
   8  -7  -7  103.26   23.56
   8   7  -7  114.91   25.00
   6  -1  13   20.24   10.02
   6   1  13   25.74   11.00
   6   0 -17   25.81   12.39
   7   5   9   11.95    7.49
   7  -5   9   42.17   14.54
   1  14  14   94.34   19.46
   1 -14  14   91.97   11.78
   2 -12  15   31.80    6.83
   2  12  15   56.56   15.22
   4   8  15  164.21   41.62
   4  -8  15  288.88   40.65
   4   0  17   11.29    6.73
   2   7  18    5.86    6.38
   2  -7  18   14.79    9.66
   2   5 -20   39.56   11.78
   2  -5 -20   96.90   25.50
   1  -2  20   14.95    9.44
   1   2  20   25.33   10.74
   5  10 -15  110.80   24.47
   5 -10 -15   84.02   16.35
   1 -13  15   62.90   11.84
   1  13  15   40.31    7.06
   1   8 -19  209.82   40.07
   1  -8 -19  235.89   45.29
   4  11  13  274.36   34.22
   4 -11  13  269.78   45.01
   4  16  -9  194.34   21.28
   4 -16  -9  234.32   42.73
   5 -14   7  736.70   25.75
   5  14   7  777.37   76.47
   5   3  15   84.41   17.73
   5  -3  15  109.26   18.20
   2  19  -4 1506.89   81.17
   2 -19  -4 1413.96   62.02
   7   2  10  459.75   33.45
   7  -2  10  422.61   53.21
   6  -1 -17   26.71   11.89
   6   1 -17   25.37   11.17
   7   8   7   17.05    7.06
   7  -8   7    7.65    6.37
   7 -12  -2  109.48   19.07
   7  12  -2   74.30   19.42
   4  -1  17  120.33   19.94
   4   1  17  124.33   17.30
   7 -12  -3  243.73   37.55
   7  12  -3  206.37   31.71
   5  15   5  180.95   31.41
   5 -15   5  170.35   29.13
   8  -2 -11  137.12   24.29
   8   2 -11  147.38   19.85
   1 -19   5   53.03   16.79
   1  19   5   58.00   15.60
   8   7   2  638.90   83.20
   8  -7   2  606.13   32.02
   8   0   6  986.77   51.25
   7  -9   6    3.09    6.34
   7   9   6    2.84    4.05
   3 -18   4    2.07    6.14
   3  18   4    6.91   10.03
   4  15 -11   50.13   13.63
   4 -15 -11   60.15   16.22
   6  14   2   50.62   15.33
   6 -14   2   39.93   10.84
   1 -17  10   34.72   12.31
   1  17  10   35.82   17.60
   3  18  -6  262.12   37.16
   3 -18  -6  280.27   42.27
   8  -8  -5  148.06   24.90
   8   8  -5  186.72   32.26
   5 -16  -5   91.51   22.31
   5  16  -5   61.88    8.41
   6 -14  -6 1696.34   60.03
   6  14  -6 1602.40   49.99
   1  18   8  125.17   25.02
   1 -18   8  125.58   21.22
   3   9  16 1232.79   79.46
   3  -9  16 1371.81   99.04
   6   2  13  119.52   15.57
   6  -2  13  103.26   23.68
   7  12  -1  888.78   43.03
   7 -12  -1 1036.34   50.10
   5   7 -17 1551.25   62.05
   5  -7 -17 1614.37   97.90
   6 -10   9  234.03   29.30
   6  10   9  298.35   51.46
   2  15  12   36.19   15.48
   2 -15  12   14.51    5.37
   8   4   5   26.11   12.25
   8  -4   5   12.20   12.40
   2   4  19   48.11   25.41
   2  -4  19   30.32    6.28
   8  -1   6   34.70   13.93
   8   1   6   56.17   18.20
   3  17   7  158.17   25.67
   3 -17   7  243.52   31.29
   3  -7  17   16.24   12.26
   3   7  17   20.29    5.90
   2  19   3  212.47   41.28
   2 -19   3  328.75   54.89
   3  16   9 2001.14   72.06
   3 -16   9 1917.25   58.64
   1  10 -18  490.19   37.25
   1 -10 -18  587.57   54.22
   3  17  -9  706.69   57.78
   3 -17  -9  673.37   48.95
   8  -8   0  184.78   23.03
   8   8   0  175.71   22.39
   2 -18  -8  860.71   57.11
   2  18  -8  848.52   65.38
   3  -9 -18   36.68   18.19
   3   9 -18   48.55   16.96
   4   6  16 1075.89   85.28
   4  -6  16 1206.67   56.84
   3  16 -11   34.06   15.02
   3 -16 -11   44.50   16.49
   0  19   6   44.21   14.15
   0 -19   6   51.89   16.78
   1  15  13   67.97   18.13
   1 -15  13   21.91   11.04
   6 -10 -13  607.37   38.84
   6  10 -13  682.83   70.62
   7  12  -4  367.02   43.45
   7 -12  -4  493.44   34.19
   3   7 -19   68.16   15.09
   3  -7 -19   77.25   38.20
   5 -13 -12  176.60   25.87
   5  13 -12  110.54   18.89
   5 -16   2  117.04   27.55
   5  16   2   80.77   14.94
   6   2 -17  376.31   45.24
   6  -2 -17  370.76   42.28
   7 -11   3  416.35   45.41
   7  11   3  483.38   45.81
   0   5  20  546.72   53.95
   0  -5  20  464.77   68.73
   3  -4  18   43.51   17.46
   3   4  18   61.35   11.26
   7  -7   8   83.91   13.25
   7   7   8   60.51    9.50
   4  -5 -19  201.19   33.09
   4   5 -19  141.31   35.91
   6 -11   8   64.58   14.36
   6  11   8  107.02   36.99
   4   2  17   99.00   29.60
   4  -2  17  121.67   28.52
   2 -16 -12  736.07   77.23
   2  16 -12  713.95   70.63
   5 -11  11 1355.81   53.59
   5  11  11 1503.93   73.63
   2   8 -19  941.94   55.97
   2  -8 -19 1037.84   60.43
   4  14  10 2161.21   81.47
   4 -14  10 2240.29  100.46
   3  13  13  321.88   39.52
   3 -13  13  217.82   41.67
   2  17   9  246.52   35.17
   2 -17   9  156.28   19.26
   1  12  16  343.43   32.26
   1 -12  16  353.59   49.62
   6   9  10  255.94   50.37
   6  -9  10  242.45   35.62
   3  -4 -20  214.39   49.29
   3   4 -20  296.08   42.66
   5  12  10   41.96   13.98
   5 -12  10    9.68    7.48
   1  19  -6  690.27   59.92
   1 -19  -6  707.30   29.96
   6  11 -12   26.69   11.03
   6 -11 -12   13.33    6.30
   6  13   5   38.81   13.65
   6 -13   5   26.79    7.95
   3  13 -15   52.58   15.27
   3 -13 -15   29.56   18.76
   4  17   4  183.10   24.51
   4 -17   4  183.22   23.49
   1   3  20   20.06   15.88
   1  -3  20   20.34    8.58
   8  -2   6   16.52    6.98
   8   2   6   27.29    9.93
   1  -9  18   93.25   15.90
   1   9  18   62.75   23.47
   6  13  -9   69.96   16.36
   6 -13  -9   93.95   12.63
   7  12   0  104.98   18.22
   7 -12   0  216.42   38.08
   7  -3  10  200.67   27.94
   7   3  10  251.93   26.09
   6  -9 -14  382.19   31.88
   6   9 -14  375.61   41.01
   7   0 -15   14.06    9.33
   7  10   5  111.40   14.44
   7 -10   5   77.00   13.07
   8   6  -9  208.65   45.00
   8  -6  -9  196.48   51.38
   3  12  14   14.25    8.11
   3 -12  14   34.70    8.92
   8  -3 -11   34.22   14.22
   8   3 -11    1.02    6.10
   3  14  12  573.79   44.61
   3 -14  12  457.29   35.72
   0   8  19  794.39   55.12
   0  -8  19  818.03   58.69
   2  11  16  811.77   84.10
   2 -11  16  693.63   47.16
   7  -1 -15  301.94   38.28
   7   1 -15  319.58   34.34
   4  10  14    5.67    6.60
   4 -10  14   15.09    7.89
   3 -12 -16 1473.50   81.42
   3  12 -16 1692.76   81.11
   5  -9 -16   80.80   17.64
   5   9 -16   69.88   23.81
   4 -12 -15    9.73   15.81
   4  12 -15   37.56   12.97
   3  14 -14  105.27   29.43
   3 -14 -14  137.34   26.69
   8  -8  -6  104.05   31.63
   8   8  -6  150.95   24.06
   2 -10 -18  507.00   52.86
   2  10 -18  385.80   35.53
   6  -3  13  266.70   27.43
   6   3  13  212.38   32.68
   2  18   7   33.09   22.47
   2 -18   7   20.59    6.80
   7  12  -5    9.51    7.80
   7 -12  -5    4.02   16.96
   5  10  12   33.04   13.15
   5 -10  12   28.95    9.20
   5   4  15 1947.62   66.63
   5  -4  15 1982.09   59.10
   6  -6  12  687.74   42.97
   6   6  12  622.41   25.50
   1 -18  -9   69.27   19.34
   1  18  -9   30.71   14.75
   4  13 -14  371.09   53.76
   4 -13 -14  394.79   54.70
   7   9 -11  131.04   28.37
   7  -9 -11  107.95   17.42
   7  -8 -12   20.14    6.91
   7   8 -12   33.56   12.84
   5  -5 -18  766.56   39.55
   5   5 -18  692.29   77.58
   2 -19  -5   38.07   19.48
   2  19  -5   26.33   13.99
   7  11  -8  388.38   38.36
   7 -11  -8  394.94   24.53
   8   5 -10   29.00    8.71
   8  -5 -10   12.86   13.59
   1   6 -20 1872.68   66.95
   1  -6 -20 1965.03   83.75
   0  18   9  210.35   32.00
   0 -18   9  119.09   26.97
   7   5 -14 1225.17   60.97
   7  -5 -14 1144.75   35.50
   8   7  -8 1290.79   54.90
   8  -7  -8 1368.09   78.07
   1  17 -11  414.06   39.56
   1 -17 -11  390.94   42.61
   1   7  19  278.01   31.27
   1  -7  19  167.16   32.54
   0  10  18   53.74   19.99
   0 -10  18   42.78   16.64
   6   3 -17    9.23    8.47
   6  -3 -17   41.34   15.54
   4 -17  -7   49.19   21.30
   4  17  -7   17.53    7.26
   8   8   1 1428.60   78.41
   8  -8   1 1294.28   41.07
   6  -6 -16  604.09   47.49
   6   6 -16  589.66   54.17
   5 -16  -6   48.19   21.46
   5  16  -6   11.44    4.27
   0  20   0   99.94   38.34
   0 -20   0   46.61   22.87
   4  -3  17   72.31   17.13
   4   3  17   66.12   17.06
   1 -14 -15  167.75   37.04
   1  14 -15  134.60   20.02
   1   0 -21  168.73   28.19
   5  13   9  614.45   36.92
   5 -13   9  510.05   45.52
   8   6   4  108.84   20.65
   8  -6   4  104.53   16.23
   6  12   7   12.25   19.29
   6 -12   7   36.32   13.92
   7  -2 -15   16.89    5.27
   7   2 -15    9.97    9.04
   4 -16   7 1239.66   44.10
   4  16   7 1299.81   62.28
   0 -17  11  865.93   65.74
   0  17  11  979.13   55.85
   6  14   3   35.04   12.87
   6 -14   3   28.33    9.40
   0 -20   1  337.10   34.52
   0  20   1  375.23   37.11
   1  -1 -21 1630.54   64.63
   1   1 -21 1537.02   77.58
   1 -13 -16  138.98   26.73
   1  13 -16  147.97   23.26
   4  11 -16   28.84   11.67
   4 -11 -16   61.16   17.37
   2  19   4  966.46   52.85
   2 -19   4  966.22   78.34
   6  12 -11    1.22   13.85
   6 -12 -11   31.52   13.57
   6  14  -7   30.47    8.56
   6 -14  -7   50.12   18.18
   5 -15  -9  537.43   56.12
   5  15  -9  457.71   49.23
   8  -3   6   25.14   13.11
   8   3   6   24.68    9.91
   1  16  12  441.62   29.55
   1 -16  12  348.12   45.15
   6   8  11  358.37   59.63
   6  -8  11  316.23   38.98
   5   7  14  502.43   85.17
   5  -7  14  578.30   31.12
   7  12   1  174.32   31.48
   7 -12   1  166.53   21.48
   7   6   9  544.77   62.98
   7  -6   9  666.90   52.68
   2  16  11  399.13   39.25
   2 -16  11  335.58   20.62
   8   7   3 1067.43   65.00
   8  -7   3 1147.54   41.74
   2   6 -20   33.84    8.14
   2  -6 -20   43.10   17.93
   4   8 -18  319.70   37.47
   4  -8 -18  360.43   44.23
   5 -16   3   21.96   11.54
   5  16   3   23.72   10.21
   8   5   5  452.87   45.32
   8  -5   5  486.30   34.68
   2  -5  19  -11.85   17.09
   2   5  19   36.79   16.06
   7  10 -10   12.50   20.67
   7 -10 -10   52.58    9.94
   7   7 -13  446.89   47.22
   7  -7 -13  368.33   35.31
   3 -18   5 1653.31   89.71
   3  18   5 1643.43   64.88
   2   0 -21   -1.68   13.17
   3  11  15  311.70   53.27
   3 -11  15  393.20   62.44
   1 -15 -14   25.82   12.09
   1  15 -14    7.20   12.71
   6   8 -15   71.43   14.60
   6  -8 -15   67.03   23.12
   3 -18  -7   63.83   19.87
   3  18  -7   29.73   14.41
   4 -14 -13   30.47   12.63
   4  14 -13   42.12   13.76
   1  -4  20   11.38   13.50
   1   4  20   37.33   20.74
   1  19   6    2.07   12.15
   1 -19   6   19.67    8.51
   5  14 -11  905.63   47.38
   5 -14 -11  833.77   48.39
   3  15  11    2.78   11.97
   3 -15  11   22.99   17.27
   3  11 -17 2022.87  133.81
   3 -11 -17 1882.37   86.00
   4   0 -20  516.15   61.27
   1  11  17   14.50   17.85
   1 -11  17   31.73    9.71
   7   4  10   11.28    8.34
   7  -4  10   30.86    9.52
   0  20   2  437.54   48.58
   0 -20   2  436.56   48.38
   2   1 -21   23.12    9.39
   2  -1 -21   23.76   11.27
   3  -5  18   32.19   14.70
   3   5  18   16.43    8.28
   3  15 -13  594.35   55.54
   3 -15 -13  570.80   50.91
   0  14  15    2.70    4.90
   0 -14  15   36.05    8.96
   1   2 -21  460.75   40.84
   1  -2 -21  525.47   38.57
   4 -15   9  116.87   39.51
   4  15   9   98.21   17.50
   8  -4 -11  326.59   44.85
   8   4 -11  305.17   31.26
   7  12  -6    5.33    4.38
   7 -12  -6   25.26   10.50
   4   1 -20  283.70   39.64
   4  -1 -20  217.43   34.69
   3  -5 -20    5.97   13.13
   3   5 -20   30.11   13.25
   8   0 -12  403.59   29.31
   8  -9  -3  651.83   55.94
   8   9  -3  684.80   36.24
   5   0 -19   16.47   13.59
   8   9  -2   54.73    8.38
   8  -9  -2   53.32    8.53
   4  18  -1   14.14    4.56
   4 -18  -1   19.66   16.04
   1  20   0  220.68   46.06
   1 -20   0  263.49   50.44
   8  -8  -7   25.54    9.09
   8   8  -7   43.07   11.93
   6  -4  13  575.82   57.09
   6   4  13  546.88   51.01
   4  18  -2  279.68   28.72
   4 -18  -2  358.97   44.04
   5  15   6  649.30   56.68
   5 -15   6  680.19   64.71
   7  11   4   17.11    6.94
   7 -11   4   31.94   16.43
   1 -20  -1  244.48   32.29
   1  20  -1  261.20   34.24
   0 -13  16   47.36   11.64
   0  13  16   22.00    7.60
   5  -9  13  453.59   62.28
   5   9  13  503.59   52.84
   8   1 -12  220.16   29.30
   8  -1 -12  233.20   41.59
   7   3 -15  469.68   56.23
   7  -3 -15  464.74   61.78
   0  -6  20  309.03   38.39
   0   6  20  159.51   31.53
   5   1 -19    9.08   14.77
   5  -1 -19   34.24   21.14
   4   6 -19  436.48   45.27
   4  -6 -19  469.11   78.51
   1 -12 -17  102.21   34.93
   1  12 -17  131.10   17.13
   2  -8  18  187.67   29.23
   2   8  18  126.21   25.06
   0 -15  14  675.35   58.03
   0  15  14  633.72   58.73
   8   9  -4   50.59   11.18
   8  -9  -4   55.38   13.38
   0  19   7   63.93   43.89
   0 -19   7   35.58   19.96
   2 -14 -15  427.33   54.41
   2  14 -15  422.27   48.12
   4  18   0   52.76   10.65
   4 -18   0  130.96   32.83
   3 -19  -1   33.56   13.00
   3  19  -1   16.17   10.27
   4  16 -10  456.64   57.72
   4 -16 -10  505.45   56.25
   1  20   1  178.43   32.33
   1 -20   1  216.90   34.18
   6  -4 -17   56.78   18.82
   6   4 -17   36.90   12.92
   2  -2 -21 1764.37   66.97
   2   2 -21 1817.81   70.03
   4  17   5  685.00   18.84
   4 -17   5  717.25   48.28
   2  13 -16  488.19   50.51
   2 -13 -16  510.19   40.19
   6  15  -2   21.87   12.16
   6 -15  -2   43.74   13.50
   4  -4  17   18.01   13.53
   4   4  17   14.12   15.80
   8   9  -1   19.36   10.76
   8  -9  -1   57.70   11.91
   4   7  16    0.90    6.40
   4  -7  16    9.66    6.63
   1  19  -7 1251.26   59.19
   1 -19  -7 1291.18   50.33
   8   8   2  250.31   47.70
   8  -8   2  261.61   38.43
   3  19   0    8.79    7.69
   3 -19   0   12.59   11.81
   3  19  -2  589.74   47.49
   3 -19  -2  688.97  105.51
   4  18  -3   19.99    7.79
   4 -18  -3   58.52   19.84
   5   5  15   76.91   12.53
   5  -5  15   35.14    7.16
   4  -2 -20   15.69   17.76
   4   2 -20   30.53   12.30
   2 -19  -6  164.83   39.11
   2  19  -6  155.14   25.29
   1  20  -2   25.86   15.30
   1 -20  -2   66.30   19.66
   0   0  21   20.90    7.72
   6  15  -1  100.12   24.96
   6 -15  -1  128.32   28.53
   6 -15  -3   43.94   12.63
   6  15  -3   42.92   17.70
   4   9  15  118.83   33.65
   4  -9  15   63.09   25.51
   2 -17 -11  334.49   47.53
   2  17 -11  352.18   48.47
   4 -10 -17  138.52   22.95
   4  10 -17  116.09   29.73
   1   9 -19   36.93    8.39
   1  -9 -19   39.40   15.68
   0 -20   3  213.12   26.77
   0  20   3  178.36   48.56
   5   8 -17 1081.57   60.84
   5  -8 -17 1204.02   67.46
   5  14   8    4.60   14.13
   5 -14   8    7.05    4.09
   8  -4   6  151.75   19.69
   8   4   6   90.19   25.91
   2 -10  17  437.36   61.01
   2  10  17  612.28   85.79
   2  18  -9   39.61   16.04
   2 -18  -9   44.42   35.90
   3   8  17    2.81    4.64
   3  -8  17    4.37    5.24
   0  -1  21   62.30   12.52
   0   1  21   46.76   16.98
   8   2 -12   25.34    9.89
   8  -2 -12   14.23    4.70
   7   9   7 2313.40   95.92
   7  -9   7 2445.31   81.22
   5  -2 -19 1911.14   87.39
   5   2 -19 1835.47   79.12
   7  12   2   42.79   17.49
   7 -12   2    7.53    6.54
   5 -16  -7   87.02   20.40
   5  16  -7   79.70   14.41
   1   3 -21 1069.04   53.57
   1  -3 -21 1125.51   54.39
   3  17   8   40.10   13.98
   3 -17   8   36.99   10.98
   8   0   7   16.65    9.97
   3   8 -19    8.16    7.27
   3  -8 -19   29.28   10.60
   1 -16 -13  161.67   27.12
   1  16 -13  138.33   23.75
   1  18   9  243.93   30.63
   1 -18   9  230.89   23.14
   9   0  -3 1041.01   56.81
   3 -17 -10  211.50   29.05
   3  17 -10  145.86   28.16
   5  -6 -18   27.87   17.51
   5   6 -18   28.86   12.79
   8   6 -10   59.55   14.81
   8  -6 -10   54.26   18.15
   8  -9  -5 1391.76   79.07
   8   9  -5 1549.59   66.15
   2 -15 -14  405.14   42.34
   2  15 -14  274.73   39.69
   6 -13   6  586.60   59.37
   6  13   6  634.03   46.81
   4  18   1   -4.34   17.61
   4 -18   1   14.82   18.66
   7  -8   8  517.16   43.85
   7   8   8  550.84   53.47
   8   7  -9  128.55   24.77
   8  -7  -9  110.19   21.14
   1 -20   2   30.54   14.49
   1  20   2   20.55   16.06
   3 -19   1  290.70   51.18
   3  19   1  286.27   38.26
   7  11  -9  453.46   41.04
   7 -11  -9  412.55   48.87
   7   6 -14  106.35   27.30
   7  -6 -14  130.23   16.31
   3  19  -3  269.94   28.89
   3 -19  -3  313.00   47.70
   8   1   7  269.08   32.28
   8  -1   7  245.80   35.23
   9   0  -2   -0.90    4.50
   9   0  -4   20.08   23.11
   9  -1  -3 1447.06   49.45
   9   1  -3 1466.14   66.74
   6 -13 -10    9.44   17.58
   6  13 -10    6.91    9.97
   6 -15   0   23.57   13.43
   6  15   0   23.64   13.13
   6  15  -4   41.25   27.70
   6 -15  -4   10.47   14.29
   2 -19   5  594.46   58.95
   2  19   5  547.24   41.70
   8  -9   0   12.37    4.72
   8   9   0   13.10    8.58
   6 -14   4 1498.13   61.14
   6  14   4 1507.47   61.45
   2 -12 -17  852.24   70.21
   2  12 -17  674.98   48.61
   0  12  17  213.01   39.55
   0 -12  17  271.00   64.64
   4 -17  -8   35.44   19.59
   4  17  -8    1.32    7.79
   7   0  11   15.54   14.00
   9   1  -2   57.43   18.57
   9  -1  -2   12.25    8.60
   4  15 -12  259.82   35.95
   4 -15 -12  216.05   29.12
   7 -10   6  255.98   28.57
   7  10   6  225.25   26.37
   5 -12 -14    3.05   17.07
   5  12 -14   23.53   14.09
   9   1  -4  555.84   92.56
   9  -1  -4  440.08   78.15
   6  -7  12   29.92   12.09
   6   7  12   35.87   15.75
   4 -18  -4   62.77   32.74
   4  18  -4   29.85   10.88
   6  14  -8   90.91   14.73
   6 -14  -8   96.02   24.79
   1  20  -3   17.87   14.90
   1 -20  -3    8.57   18.10
   0   2  21  145.63   19.83
   0  -2  21  162.60   20.66
   2   3 -21  898.70   68.10
   2  -3 -21  966.51   48.50
   1   7 -20  293.34   29.36
   1  -7 -20  401.99   67.04
   5 -16   4   75.58   17.31
   5  16   4  106.09   20.27
   1   5  20    9.00   14.40
   1  -5  20   10.04   16.37
   7 -12  -7  743.52   51.14
   7  12  -7  723.36   30.12
   2  -9 -19   32.82   16.10
   2   9 -19   12.59    8.30
   0 -16  13  395.70   42.60
   0  16  13  418.22   35.13
   3  10  16   29.41   16.00
   3 -10  16   44.04   26.54
   5  11 -15   34.53   13.58
   5 -11 -15    4.81   22.92
   7   1  11 1105.70   41.85
   7  -1  11 1089.33   78.20
   4  -3 -20  565.14   63.37
   4   3 -20  568.33   57.55
   7   5  10  184.73   24.01
   7  -5  10  232.32   31.82
   1  17  11   94.41   32.92
   1 -17  11  128.88   31.53
   7   4 -15 1563.08   74.74
   7  -4 -15 1431.04   47.31
   6   7 -16  499.68   50.89
   6  -7 -16  449.93   48.85
   3  10 -18  148.57   24.16
   3 -10 -18  147.63   37.37
   9   0  -1 1985.26   59.42
   3 -16  10  677.61   74.08
   3  16  10  940.86   52.21
   8  -7   4   15.86    6.98
   8   7   4   23.46    8.67
   8   5 -11  282.55   37.64
   8  -5 -11  271.87   34.18
   8  -2   7  161.79   33.45
   8   2   7  164.09   35.40
   9   0  -5  705.63   48.35
   8  -6   5   46.46   11.36
   8   6   5   58.30   14.95
   2  -6  19  101.26   36.91
   2   6  19  176.81   27.13
   9  -2  -3 1828.01   66.96
   9   2  -3 1959.29   85.03
   2 -18   8  306.48   30.10
   2  18   8  422.51   42.60
   3 -16 -12   27.67   23.71
   3  16 -12   11.55   14.30
   8  -3 -12   29.30    9.36
   8   3 -12   16.21    7.35
   5   3 -19   41.48   16.11
   5  -3 -19   39.47   14.93
   4  13  12   85.53   48.54
   4 -13  12   86.04   16.47
   9   1  -1  520.77   10.23
   9  -1  -1  530.59   35.04
   8   8  -8  115.37   24.50
   8  -8  -8   54.75   15.99
   5   0  16   -2.03    6.13
   2 -17  10   57.34   12.50
   2  17  10   26.03   26.68
   6  -5  13  533.74   55.64
   6   5  13  503.07   32.44
   6  11   9  496.15   44.57
   6 -11   9  398.25   31.88
   9  -1  -5 1165.54   75.26
   9   1  -5 1323.54   71.97
   4 -12  13  146.53   42.08
   4  12  13  139.75   31.58
   9  -2  -2   33.74    7.94
   9   2  -2   48.14   13.59
   1   8  19  266.79   38.40
   1  -8  19  290.65   42.57
   9   2  -4  624.30   74.01
   9  -2  -4  569.02   27.39
   6 -10  10  158.76   31.49
   6  10  10  199.23   45.81
   5  13 -13  582.85   70.87
   5 -13 -13  599.43   70.53
   3 -18   6  240.57   30.06
   3  18   6  219.69   25.71
   0   9  19   70.96   25.12
   0  -9  19   51.64   17.41
   1  11 -18  121.28   17.75
   1 -11 -18  130.58   30.72
   2   0  20   45.45    7.97
   3  19   2 1024.55   47.68
   3 -19   2 1004.24   59.98
   3  -6  18  167.33   27.03
   3   6  18  115.08   18.30
   3   0  19 2874.65  114.95
   0 -20   4  118.94   21.33
   0  20   4  155.32   25.26
   7  -7   9 1063.43   47.36
   7   7   9  997.33   68.12
   2 -14  14  106.48   44.06
   2  14  14   73.86   18.65
   3  19  -4   59.14   12.29
   3 -19  -4   74.85   45.82
   3 -18  -8  210.18   31.25
   3  18  -8  270.51   35.95
   8   9  -6   14.04   12.88
   8  -9  -6   19.94    9.75
   2  -7 -20 1021.18   79.12
   2   7 -20  977.43   46.33
   4 -18   2   32.94   15.66
   4  18   2    3.49   12.90
   6  15   1   32.92   11.13
   6 -15   1   18.61   14.04
   5  -1  16   11.90    7.23
   5   1  16    5.91    9.24
   1 -20   3  608.81   51.04
   1  20   3  691.55   62.73
   7   2  11  405.27   51.60
   7  -2  11  430.43   51.32
   6 -11 -13  490.61   45.93
   6  11 -13  530.34   81.43
   6 -15  -5 1080.37   60.96
   6  15  -5  958.11   71.08
   5 -17  -2    0.78   36.11
   5  17  -2   50.78   27.01
   1 -18 -10  410.24   46.75
   1  18 -10  468.02   36.28
   1  10  18   28.73   14.46
   1 -10  18   37.32   10.89
   7  -9 -12  105.88   14.31
   7   9 -12  120.39   26.46
   3   6 -20 1737.27   67.96
   3  -6 -20 1816.67  102.43
   6  10 -14  128.45   24.82
   6 -10 -14  137.80   37.22
   6   5 -17   44.39   21.54
   6  -5 -17   21.22   14.12
   1  19   7  335.21   41.67
   1 -19   7  354.09   44.32
   2  -1  20  392.50   43.27
   2   1  20  440.15   34.90
   3   0 -21 1917.90   81.86
   5  17  -1   -3.50   12.54
   5 -17  -1    7.04    9.21
   3  -1  19  400.31  102.53
   3   1  19  368.71   60.40
   2  13  15    8.36    6.82
   2 -13  15    5.12    3.13
   5 -15 -10  311.40   38.91
   5  15 -10  213.96   42.23
   4   5  17  114.04   16.65
   4  -5  17  122.30   23.83
   1  -4 -21  501.97   56.02
   1   4 -21  409.89   38.84
   0 -18  10   61.07   19.57
   0  18  10   53.37   18.68
   0   3  21   36.22   15.54
   0  -3  21   38.25   17.01
   5   8  14   83.51   23.33
   5  -8  14   21.21    6.12
   3   1 -21   41.85   13.75
   3  -1 -21    4.57   18.47
   8   9   1   14.02    8.76
   8  -9   1    3.33    2.61
   7  13  -2   30.55   16.71
   7 -13  -2   39.44   16.34
   5  10 -16  844.69   63.75
   5 -10 -16  995.57   54.12
   8   8   3  473.47   49.60
   8  -8   3  540.01   25.31
   2 -16 -13   21.03   17.11
   2  16 -13  -18.84   16.46
   9  -2  -1   13.23    5.45
   9   2  -1   24.90   18.17
   5  17  -3  125.96   26.92
   5 -17  -3  180.84   33.07
   4  14  11  160.81   42.56
   4 -14  11  223.94   32.37
   4 -16   8 3237.98  123.08
   4  16   8 3049.11  101.87
   7 -13  -3  776.22   49.10
   7  13  -3  820.38   76.33
   9   2  -5 1551.04   85.52
   9  -2  -5 1658.69   78.88
   4 -18  -5  530.66   58.34
   4  18  -5  383.37   36.11
   8  -5   6   18.62    8.03
   8   5   6   32.74    8.80
   7   8 -13    1.97    9.80
   7  -8 -13   22.70    7.26
   1  20  -4   70.36   20.30
   1 -20  -4   49.64   13.99
   9   0   0    5.48    4.95
   7 -10 -11 3217.92  108.23
   7  10 -11 3290.71  120.81
   2  15  13   97.27   19.47
   2 -15  13   26.33    5.65
   7  12   3  366.85   58.93
   7 -12   3  282.03   54.53
   5  17   0  134.66   26.25
   5 -17   0  153.35   31.23
   6   0  14 2469.05   84.55
   6 -12   8    9.20    4.54
   6  12   8   42.07   26.67
   7 -11   5 1683.47   74.32
   7  11   5 1757.32   68.73
   9   0  -6    6.51   19.53
   5  12  11  218.28   33.47
   5 -12  11  305.60   40.76
   5  -2  16  380.11   31.15
   5   2  16  370.70   45.12
   1  14  15   28.10   14.67
   1 -14  15   11.76    4.20
   7  13  -1   65.50   22.72
   7 -13  -1  103.99   21.91
   8  -3   7   19.92    7.93
   8   3   7   23.97   11.33
   2 -19  -7   78.49   18.39
   2  19  -7   26.12   18.48
   9  -3  -3   13.85    5.24
   9   3  -3   27.75   20.11
   5  -6  15 1209.30   59.10
   5   6  15 1146.69   53.49
   6   9  11   12.96   16.00
   6  -9  11   20.75    8.98
   9  -1   0  101.15   14.77
   9   1   0   97.30   14.52
   2  -2  20   30.03   12.85
   2   2  20   33.06   14.59
   2  -4 -21  525.97   65.78
   2   4 -21  507.13   48.75
   4  11  14  739.01   35.72
   4 -11  14  615.07   51.73
   0   7  20  798.17   51.09
   0  -7  20  901.46  100.92
   3   2  19  370.33   45.61
   3  -2  19  450.01   49.06
   6   1  14 1672.94   81.61
   6  -1  14 1550.53   62.45
   6  12 -12 1057.14   59.16
   6 -12 -12 1060.04   51.33
   4   7 -19  153.86   27.98
   4  -7 -19  118.13   44.79
   9   1  -6  124.08   27.16
   9  -1  -6  174.22   31.20
   4  -9 -18  407.84   60.19
   4   9 -18  375.27   46.30
   2  11 -18 1254.26   75.85
   2 -11 -18 1296.36   58.84
   9   3  -2   95.54   23.31
   9  -3  -2   87.84   14.98
   4 -17   6   55.23   10.69
   4  17   6   44.89   17.10
   7  13  -4  223.86   40.77
   7 -13  -4  270.38   33.10
   6   0 -18 1078.45   52.73
   9   3  -4  154.68   30.21
   9  -3  -4  102.46   14.85
   5  11  12   82.89   17.59
   5 -11  12   93.22   18.52
   4   4 -20  521.27   54.19
   4  -4 -20  521.21   64.56
   5 -16  -8   82.94   21.41
   5  16  -8   71.38   11.83
   3  -2 -21 1328.14   74.25
   3   2 -21 1256.40   57.89
   6   9 -15  515.63   53.74
   6  -9 -15  489.58   50.81
   1  15  14    0.18    9.90
   1 -15  14   14.23    9.45
   1 -17 -12  175.18   38.08
   1  17 -12  176.17   39.17
   0  19   8 1071.25   88.26
   0 -19   8  987.10   43.40
   2 -20  -1  557.48   41.47
   2  20  -1  601.65   51.91
   7   3  11  915.04   70.74
   7  -3  11 1002.41   46.98
   6  -1 -18   19.27   19.98
   6   1 -18   25.14   11.29
   1 -19  -8   63.10   22.22
   1  19  -8   56.94   25.74
   5  15   7  728.30   61.57
   5 -15   7  674.08   21.78
   0  11  18  122.15   14.74
   0 -11  18  167.78   31.83
   5 -17  -4  228.95   39.84
   5  17  -4  283.39   48.86
   1  13  16   65.89    9.20
   1 -13  16   56.15   24.18
   2 -20   0   36.56   18.04
   2  20   0   26.15   18.15
   8   4 -12   27.10    8.51
   8  -4 -12    5.24   16.60
   2  12  16  352.97   53.83
   2 -12  16  190.54   21.69
   5  13  10   68.96   18.01
   5 -13  10   14.71    8.01
   5   4 -19 2777.40  125.71
   5  -4 -19 2727.78   95.59
   7   0 -16   -3.47   14.57
   3  19   3   42.54   12.98
   3 -19   3   33.70   16.90
   3  19  -5 1593.86   70.73
   3 -19  -5 1749.75   80.88
   5 -14 -12 1468.04   63.43
   5  14 -12 1462.62   70.91
   6 -15   2    5.38    8.09
   6  15   2   28.26   13.59
   9   2   0   98.65   21.07
   9  -2   0  114.19   16.57
   7  13   0  348.06   55.65
   7 -13   0  419.20   39.23
   7  12  -8  710.16   60.68
   7 -12  -8  595.84   41.71
   7   5 -15   24.06   35.65
   7  -5 -15    8.42    6.15
   5  17   1   41.61   11.99
   5 -17   1   44.84   19.78
   2 -20  -2  161.49   32.23
   2  20  -2  103.72   24.89
   6   2  14  853.90   45.41
   6  -2  14  849.97   45.76
   6  15  -6  621.03   11.26
   6 -15  -6  678.45   60.99
   9  -2  -6    3.81    3.37
   9   2  -6   46.89   18.76
   9   3  -1  380.12   51.78
   9  -3  -1  354.45   32.62
   4   8  16  769.33   45.71
   4  -8  16  782.53  106.70
   4  18   3    5.02    4.90
   4 -18   3    9.69    5.18
   0  17  12  981.70   50.88
   0 -17  12  931.99   42.70
   3  13  14   15.97    8.91
   3 -13  14   -3.92   10.18
   7   1 -16   23.37    8.57
   7  -1 -16   20.83   29.06
   8   9  -7   90.55   21.42
   8  -9  -7   91.24   16.86
   2  19   6   55.95   14.76
   2 -19   6    7.45   34.62
   9   3  -5   46.95   17.67
   9  -3  -5   39.85    9.00
   3  14  13   99.29   18.80
   3 -14  13   43.96   15.68
   1 -20   4  972.78   61.69
   1  20   4  947.47   68.20
   5   7 -18  164.15   27.63
   5  -7 -18  189.88   47.07
   8  -7 -10   -7.88   18.50
   8   7 -10   26.60   13.14
   2  20   1   41.58   20.93
   2 -20   1   80.76   19.49
   3  13 -16  128.13   22.91
   3 -13 -16   80.45   22.03
   8   0 -13    7.20    5.22
   6  14   5   86.03   17.31
   6 -14   5   87.91   14.02
   4 -13 -15  486.87   59.45
   4  13 -15  588.52   66.33
   3 -14 -15  630.12   58.59
   3  14 -15  726.95   46.24
   2   9  18  -19.50   21.50
   2  -9  18   12.19   14.54
   1   6  20  467.84   38.46
   1  -6  20  470.03   51.43
   0 -20   5  816.90   54.40
   0  20   5  850.34   65.96
   7  -7 -14  396.34   32.87
   7   7 -14  461.48   37.41
   5  -3  16   59.75    9.05
   5   3  16   81.84   17.16
   5  16   5  303.26   46.66
   5 -16   5  292.41   43.48
   6   2 -18  799.08   53.13
   6  -2 -18  885.66   68.03
   7  13  -5  105.05   24.98
   7 -13  -5  200.33   45.09
   7 -11 -10   32.61    8.77
   7  11 -10   45.71   13.97
   4 -16 -11   33.51   13.53
   4  16 -11    7.64    9.27
   6 -14  -9  116.69   38.20
   6  14  -9  161.01   21.82
   0   4  21  423.34   51.06
   0  -4  21  395.98   51.86
   7  -6  10  112.94   19.93
   7   6  10   84.33   14.40
   8  10  -3    0.47    2.49
   8 -10  -3    0.38    3.94
   2  -3  20   38.37   10.11
   2   3  20   62.45   17.92
   3   3  19  321.40   34.12
   3  -3  19  240.14   32.15
   8   1 -13   26.72    8.10
   8  -1 -13   25.90    7.83
   8 -10  -2  441.43   30.60
   8  10  -2  464.93   53.18
   9   0   1 1235.62   72.06
   4 -12 -16   35.88   14.92
   4  12 -16    8.02   13.47
   4 -15  10  468.42   47.55
   4  15  10  373.18   43.73
   8   6 -11  411.98   60.29
   8  -6 -11  355.01   40.66
   2 -16  12  568.45   23.12
   2  16  12  674.50   60.47
   8  -9   2    0.74    2.41
   8   9   2    4.18    8.72
   4  17  -9   19.78   15.32
   4 -17  -9   30.73   17.13
   9   0  -7  300.30   56.57
   5  10  13  481.08   41.90
   5 -10  13  497.10   70.91
   3  -3 -21  306.69   41.19
   3   3 -21  191.90   50.36
   2 -18 -10   40.16   19.02
   2  18 -10   44.86   13.56
   9   1   1   75.73   13.51
   9  -1   1   75.81   16.69
   1   5 -21  379.45   31.96
   1  -5 -21  380.17   62.58
   8   8  -9 1115.93   47.16
   8  -8  -9 1046.99  122.49
   7   2 -16   22.87   15.68
   7  -2 -16   25.63   14.04
   4  18  -6  190.18   29.54
   4 -18  -6  205.76   34.84
   1 -20  -5   82.54   19.86
   1  20  -5   79.63   29.15
   6   6  13    5.46    5.53
   6  -6  13    2.98    7.50
   1  16  13  895.57   64.79
   1 -16  13  910.72   47.22
   8  10  -4    6.47    4.19
   8 -10  -4   18.17   11.85
   2  20  -3   24.78   15.04
   2 -20  -3   24.70   15.30
   5   9 -17   31.99   21.78
   5  -9 -17   41.56   14.91
   8   4   7  195.69   32.98
   8  -4   7  270.83   30.99
   6 -13   7   12.11    4.97
   6  13   7   58.55   23.18
   9  -4  -3 2803.00  109.03
   9   4  -3 2752.78  120.26
   3  -9  17    8.79    5.23
   3   9  17    6.25   17.12
   9   1  -7  299.28   75.75
   9  -1  -7  304.48   38.32
   1   0  21   29.82   12.00
   4 -14 -14   93.44   19.46
   4  14 -14   65.80   17.94
   3  12  15   34.37   26.53
   3 -12  15    4.54    3.41
   5  17  -5    3.43    2.99
   5 -17  -5   23.19   11.28
   4   0  18 2353.97   94.17
   8 -10  -1   57.56   15.30
   8  10  -1   61.86   13.54
   6 -13 -11   55.55   26.11
   6  13 -11   51.64   12.52
   9  -4  -2   25.27   18.18
   9   4  -2   23.86   16.55
   8   7   5   43.34   11.86
   8  -7   5   21.11    7.40
   3 -15  12   29.24   25.64
   3  15  12   18.30   21.07
   3  -9 -19  518.87   43.38
   3   9 -19  604.11   63.82
   2   7  19  391.45   43.86
   2  -7  19  352.87   52.25
   9   4  -4   26.17   13.25
   9  -4  -4   -0.64    5.72
   3  12 -17   29.19   12.11
   3 -12 -17   29.38   13.00
   6   8  12  789.12  103.05
   6  -8  12  706.55   62.90
   1   1  21   23.71    9.49
   1  -1  21    7.71    3.89
   9  -3   0  221.21   56.54
   9   3   0  199.54   23.22
   1 -12  17  294.70   39.01
   1  12  17  268.17   42.12
   6  -6 -17  390.50   38.89
   6   6 -17  507.00   50.05
   3  17   9   52.78   24.85
   3 -17   9   32.56   12.62
   1  -8 -20 1011.24   68.07
   1   8 -20  955.03   59.08
   2  20   2  783.04   73.78
   2 -20   2  685.59   64.85
   4   1  18  548.99   27.57
   4  -1  18  427.89   39.95
   7  13   1  120.20   26.40
   7 -13   1   91.43   25.05
   7  -9   8  251.44   33.58
   7   9   8  211.32   37.39
   6  -3  14   27.97    8.30
   6   3  14   12.41   19.59
   8   2 -13    5.97    5.84
   8  -2 -13    5.66    3.24
   4  10  15   45.35   25.20
   4 -10  15   33.88   22.75
   4   6  17   14.54   17.56
   4  -6  17   38.72   12.12
   3 -15 -14  608.12   44.82
   3  15 -14  506.47   54.12
   9   3  -6  160.00   33.46
   9  -3  -6  126.61   28.93
   5 -14   9  157.63   23.26
   5  14   9  262.11   43.39
   3 -17 -11  330.63   48.62
   3  17 -11  278.74   34.21
   1  10 -19    5.78    3.61
   1 -10 -19   17.25   23.28
   7   4  11    8.89    8.26
   7  -4  11   40.10    9.91
   5  17   2  719.52   46.44
   5 -17   2  681.89   64.13
   1  18  10    9.12   35.00
   1 -18  10    6.43   11.27
   2   5 -21   83.00   13.96
   2  -5 -21  100.84   23.37
   7 -10   7  441.48   40.74
   7  10   7  475.48   60.03
   3  -7  18   62.64   15.57
   3   7  18   25.55   14.59
   6  -8 -16 1536.85   69.87
   6   8 -16 1434.56   60.40
   9   2   1  625.55   43.45
   9  -2   1  577.74   43.82
   1  14 -16  311.52   36.52
   1 -14 -16  357.65   45.75
   8   0   8   23.98   19.80
   2 -17 -12  481.02   58.40
   2  17 -12  483.10   58.70
   8   8   4   31.75   17.24
   8  -8   4   22.40    6.74
   6  -3 -18   49.05   16.71
   6   3 -18   16.40   14.25
   8   6   6   23.25    9.02
   8  -6   6   22.30   21.07
   7 -12   4   39.20   12.37
   7  12   4   42.35   13.77
   3  18   7  564.33   30.31
   3 -18   7  674.27   47.41
   4  -5 -20  373.38   47.37
   4   5 -20  350.88   54.01
   9  -2  -7  794.50   64.81
   9   2  -7  613.78   48.80
   3   7 -20  152.99   27.01
   3  -7 -20  193.66   36.55
   8  10  -5   34.82   10.24
   8 -10  -5   49.92   14.06
   3  18  -9  144.41   29.31
   3 -18  -9  173.06   33.31
   1 -15 -15  710.73   57.48
   1  15 -15  636.75   62.38
   9  -4  -1   43.93   17.11
   9   4  -1   70.64   17.63
   8   1   8  183.68   38.43
   8  -1   8  108.64   19.13
   4 -11 -17   75.67   21.93
   4  11 -17   63.87   15.85
   9   4  -5  686.60   52.62
   9  -4  -5  642.84   41.11
   7  13  -6  146.56   23.19
   7 -13  -6  217.56   36.36
   2  11  17  104.37   22.03
   2 -11  17   56.64   14.89
   3  19   4   31.47   11.44
   3 -19   4   75.24   26.13
   1  -2  21   15.47    7.75
   1   2  21   23.49    8.43
   8  -5 -12   90.03   24.18
   8   5 -12   98.26   29.53
   3 -19  -6  352.41   39.61
   3  19  -6  344.65   34.85
   4   2  18 1026.32   63.60
   4  -2  18 1187.41   98.91
   5  -5 -19   65.27   25.47
   5   5 -19   91.25   27.11
   7   8   9  285.72   47.34
   7  -8   9  301.07   41.36
   6  15   3   50.48   13.08
   6 -15   3   48.58   16.07
   8 -10   0 1736.31   80.42
   8  10   0 1664.81   98.86
   2  -8 -20   52.58   20.39
   2   8 -20   17.03    6.17
   7  -3 -16   84.41   17.83
   7   3 -16  116.24   23.64
   1 -19   8   29.75   10.69
   1  19   8    4.33   20.08
   5   4  16    0.70    6.82
   5  -4  16   10.86    5.51
   6  15  -7    8.83    6.24
   6 -15  -7   26.92   11.36
   2  18   9   13.32   19.86
   2 -18   9    7.73    6.94
   2  20  -4  517.36   64.85
   2 -20  -4  604.92   41.30
   2   4  20  333.72   36.41
   2  -4  20  347.40   52.37
   3   4  19   -0.65   12.77
   3  -4  19   27.61   13.75
   1  13 -17   29.73    9.44
   1 -13 -17   51.11   15.36
   4  18   4  710.67   78.17
   4 -18   4  725.96   46.71
   2 -19  -8   56.18   12.96
   2  19  -8   49.43   14.96
   8  -9  -8   51.15   16.83
   8   9  -8   21.44   10.53
   2 -10 -19  699.94   74.84
   2  10 -19  645.50   42.32
   1 -20   5  436.82   32.00
   1  20   5  520.15   41.69
   1  -9  19   14.72   11.30
   1   9  19   27.91   19.81
   5  -7  15   20.64    8.91
   5   7  15   29.65   17.76
   3  -4 -21  198.49   43.72
   3   4 -21  273.74   37.65
   8   3 -13  222.24   36.69
   8  -3 -13  171.27   18.62
   8   2   8   37.35   15.11
   8  -2   8   35.76    8.56
   4 -15 -13   39.69   17.11
   4  15 -13   42.92   11.29
   9   0   2   20.17   10.81
   5 -15 -11  115.95   24.62
   5  15 -11   96.26   23.32
   5 -16  -9  200.60   40.90
   5  16  -9  289.00   33.09
   7  11   6   94.73   20.04
   7 -11   6  106.11   32.20
   2  20   3   51.42   16.96
   2 -20   3   38.07   13.38
   0 -14  16   23.32   10.56
   0  14  16   19.40    8.59
   0   5  21  127.97   26.22
   0  -5  21  177.64   30.85
   7   6 -15 1265.68  110.81
   7  -6 -15 1266.55   79.84
   5 -17  -6   20.09   14.34
   5  17  -6   31.24    9.88
   9   0  -8   38.19   18.37
   0 -15  15   90.41   18.15
   0  15  15   42.75   17.03
   9  -3   1  361.02   67.33
   9   3   1  329.58   56.60
   7 -12  -9   47.98   11.75
   7  12  -9   40.43   14.70
   3  11  16   72.80   28.78
   3 -11  16   94.96   23.45
   9  -1   2   53.26   16.85
   9   1   2   39.77   10.52
   0  20   6   20.22   23.61
   0 -20   6  -12.64   25.86
   9  -3  -7   34.67    9.85
   9   3  -7   94.65   22.62
   9  -4   0   41.82   15.23
   9   4   0   46.71   16.30
   5  -9  14  778.39   54.94
   5   9  14  749.62   96.88
   0 -10  19   48.27   14.27
   0  10  19   51.78   20.52
   0   8  20 1221.94   90.26
   0  -8  20 1040.59   90.83
   2 -14 -16  352.64   46.51
   2  14 -16  386.07   46.41
   1 -16 -14  221.47   30.57
   1  16 -14  154.30   24.41
   4 -17   7   90.83   11.65
   4  17   7  123.38   26.44
   7 -13   2   34.65   12.90
   7  13   2   28.32    7.05
   8  -9   3   39.91    9.52
   8   9   3   42.93   15.59
   6  -4  14  388.73   42.80
   6   4  14  420.17   38.44
   4  -8 -19  479.15   55.81
   4   8 -19  448.99   52.00
   9   1  -8   27.90   12.84
   9  -1  -8   58.59   16.80
   9  -4  -6  264.36   42.00
   9   4  -6  381.93   59.00
   8  10  -6   85.21   16.19
   8 -10  -6  141.95   34.21
   3 -11 -18  359.38   40.86
   3  11 -18  263.96   39.24
   1  18 -11  790.66   37.68
   1 -18 -11  868.93   52.12
   3  16  11   91.15   20.36
   3 -16  11   91.04   19.97
   8   5   7   39.46   10.59
   8  -5   7   53.44   11.53
   7   9 -13   56.44   18.73
   7  -9 -13   48.78   12.74
   9   5  -3  259.33   32.65
   9  -5  -3  260.45   43.63
   1  17  12 1069.75   65.93
   1 -17  12 1023.29   85.06
   1  -3  21   44.28   14.28
   1   3  21   33.69   21.05
   7  10 -12  452.79   51.36
   7 -10 -12  478.41   41.60
   4  18  -7   37.61    9.73
   4 -18  -7   75.18   22.36
   1 -20  -6   47.19   34.92
   1  20  -6   48.02   23.31
   4   3  18 1499.72   73.13
   4  -3  18 1516.79   83.09
   2  17  11   61.15   19.25
   2 -17  11   63.20   12.54
   3  16 -13   19.00   10.15
   3 -16 -13   32.93   13.79
   5 -12 -15  363.27   47.13
   5  12 -15  230.08   52.68
   4  16   9    4.23   17.91
   4 -16   9   32.79   13.24
   5  17   3    9.61   12.06
   5 -17   3   28.87   19.19
   2  15 -15  392.56   42.66
   2 -15 -15  434.65   48.95
   9   5  -2   21.20   11.14
   9  -5  -2   21.89   11.78
   6  -4 -18  464.91   59.12
   6   4 -18  473.14   40.82
   2  19   7  620.61   70.37
   2 -19   7  710.61   48.44
   9   5  -4 1120.13   72.41
   9  -5  -4 1090.57   57.60
   6  11  10  139.79   25.24
   6 -11  10  124.93   20.64
   1  19  -9  227.09   29.34
   1 -19  -9  214.59   33.70
   8 -10   1  147.92   28.87
   8  10   1  102.31   39.41
   0  18  11    8.15   22.28
   0 -18  11   24.71   12.49
   0 -19   9   30.88   13.69
   0  19   9   50.88   17.43
   1  -6 -21  107.05   24.75
   1   6 -21   74.31   12.03
   1   7  20   19.09   11.38
   1  -7  20   32.09   12.25
   2  13 -17  208.10   33.59
   2 -13 -17  282.02   34.57
   0  13  17    4.07    7.75
   0 -13  17   19.29   10.77
   9   2   2   19.38    9.40
   9  -2   2   43.22   14.79
   7  -5  11   31.57    8.29
   7   5  11   23.81    6.89
   5  16   6    0.97    2.67
   5 -16   6    1.00    3.18
   5  13 -14 1665.79   77.30
   5 -13 -14 1747.54   72.72
   1  11  18  102.87   21.12
   1 -11  18   93.96   18.46
   7   7  10 2528.30   83.92
   7  -7  10 2528.45   89.52
   6 -11 -14  652.26   47.25
   6  11 -14  636.23   62.15
   6  14   6   64.61   31.95
   6 -14   6   83.95   43.56
   7   0  12   34.90   13.21
   9  -2  -8   17.45   11.16
   9   2  -8   54.67   19.98
   8  -3   8   23.27    9.90
   8   3   8   11.67   12.27
   7 -13  -7   22.14    8.13
   7  13  -7   31.97    9.27
   7  -4 -16   67.95   13.74
   7   4 -16   40.57   12.83
   0 -16  14   45.88   14.50
   0  16  14   28.65   13.14
   8   7 -11    3.92   13.91
   8  -7 -11   15.99    9.85
   6  12   9  107.32   28.27
   6 -12   9   69.32   17.36
   5  15   8  299.92   57.14
   5 -15   8  288.92   34.00
   6  14 -10  211.72   37.52
   6 -14 -10  200.66   43.56
   6  10  11   26.04   76.03
   6 -10  11   73.09   16.23
   5  -8 -18  353.94   45.77
   5   8 -18  278.60   33.95
   2  20  -5   28.38   12.73
   2 -20  -5   47.35   30.13
   1 -12 -18  288.09   38.27
   1  12 -18  244.54   36.07
   8   8 -10  150.91   28.61
   8  -8 -10  166.31   28.48
   5   0 -20   32.96   13.06
   7  -1  12   38.35   10.08
   7   1  12   26.75    9.09
   5 -11 -16   50.91   23.23
   5  11 -16   98.92   17.12
   6 -16  -2   34.84   16.15
   6  16  -2   26.69   15.82
   9  -5  -1   13.53    9.75
   9   5  -1   -5.90   13.19
   7   8 -14  192.76   31.03
   7  -8 -14  153.15   27.95
   4 -10 -18 1010.93   79.84
   4  10 -18 1046.07   52.40
   6   7  13  548.86   59.83
   6  -7  13  495.49   39.98
   9   5  -5   11.50   17.03
   9  -5  -5   29.77    7.98
   6  12 -13   95.08   26.91
   6 -12 -13   85.07   33.78
   7  11 -11   25.76   14.23
   7 -11 -11   22.87    9.28
   2  -6 -21  838.35   74.90
   2   6 -21  775.59   35.49
   5  -1 -20   44.61   14.56
   5   1 -20   45.28   21.62
   6  10 -15 2403.82   95.58
   6 -10 -15 2482.55   95.58
   6  16  -1   84.64   21.41
   6 -16  -1  161.97   28.79
   8  -4 -13  193.03   21.75
   8   4 -13  157.41   59.52
   6  16  -3   20.73   17.82
   6 -16  -3   44.95   14.70
   4   0 -21   27.97   12.51
   4   9  16   19.38   21.96
   4  -9  16   21.47   15.37
   1   0 -22   18.76   12.52
   5  -5  16    5.51    4.29
   5   5  16   20.14   15.67
   4  13  13   47.81   14.36
   4 -13  13   62.37   22.57
   4  -6 -20   33.46   18.33
   4   6 -20   30.51   22.69
   4  17 -10  259.87   35.30
   4 -17 -10  245.23   34.98
   3 -19   5  125.78   23.06
   3  19   5   52.81   12.26
   6  -7 -17  191.36   29.67
   6   7 -17  199.97   41.97
   2  -5  20  225.63   38.01
   2   5  20  306.97   42.90
   3   5  19  389.41   38.10
   3  -5  19  339.19   31.49
   3 -19  -7   83.04   26.61
   3  19  -7   64.69   16.11
   6  15   4   13.70    8.11
   6 -15   4   18.01   14.05
   4   7  17  120.03   22.88
   4  -7  17   57.19   20.32
   9  -4   1   80.32   16.10
   9   4   1   46.78   11.49
   4   1 -21   34.78   12.12
   4  -1 -21   33.52   24.35
   1   1 -22   47.71   16.46
   1  -1 -22   28.91   13.93
   2 -20   4   95.17   24.35
   2  20   4   67.65   16.43
   6  15  -8   13.85   10.97
   6 -15  -8   46.42   35.06
   9   4  -7  278.41   32.61
   9  -4  -7  214.07   48.38
   8  -6 -12  812.35   64.50
   8   6 -12  754.04   75.31
   3  -5 -21   11.16    7.97
   3   5 -21    1.93   17.92
   2  16 -14  142.01   28.30
   2 -16 -14  133.01   23.34
   5   6 -19   30.51   15.89
   5  -6 -19   29.29   16.71
   4  14  12   12.98   12.60
   4 -14  12    8.06   14.78
   7   2  12  149.01   21.42
   7  -2  12  212.52   28.85
   0  21   0   35.71   32.45
   0 -21   0   29.85   25.60
   7 -12   5   50.87   31.85
   7  12   5   26.98    9.12
   8  10  -7  335.39   43.58
   8 -10  -7  285.93   56.27
   2   0 -22  166.10   33.28
   9   3   2   20.67   10.75
   9  -3   2   21.41    8.25
   8  -8   5   12.99    7.00
   8   8   5   40.41   10.99
   2   8  19   25.28   16.47
   2  -8  19   61.16   18.59
   8   7   6   41.35   28.02
   8  -7   6   88.98   17.48
   5 -14 -13  150.12   47.99
   5  14 -13   96.90   20.30
   1  -4  21  107.15   23.01
   1   4  21   96.36   20.67
   6  16   0   30.11   11.91
   6 -16   0   30.97   16.33
   4 -12  14   28.53   23.23
   4  12  14    8.51    9.18
   4  18   5   57.06   16.03
   4 -18   5   77.82   16.70
   6  16  -4   25.52   13.62
   6 -16  -4   49.36   18.75
   4   4  18   13.74   11.28
   4  -4  18   14.51   10.99
   5  -2 -20    0.85   19.25
   5   2 -20   23.35   27.38
   5 -17  -7  306.69   56.08
   5  17  -7  345.56   35.51
   0 -21   1   31.08   16.71
   0  21   1   38.26   15.34
   9   3  -8   19.74   10.07
   9  -3  -8   21.43   11.32
   4  19  -1  292.27   49.32
   4 -19  -1  377.48   42.20
   2  10  18  229.54   39.74
   2 -10  18  249.04   36.37
   8   9  -9  404.70   42.95
   8  -9  -9  342.38   56.44
   1  20   6   78.29   23.69
   1 -20   6  102.30   20.98
   2  12 -18   38.86   15.98
   2 -12 -18   22.19   15.22
   2  -1 -22 1496.51   76.34
   2   1 -22 1681.82  116.32
   4  19  -2  481.82   28.37
   4 -19  -2  518.53   64.60
   9   0   3   81.96   17.88
   4 -16 -12   41.48   13.97
   4  16 -12   24.70   11.94
   1 -17 -13  258.37   38.61
   1  17 -13  405.65   36.95
   5  12  12   14.32   15.97
   5 -12  12    3.21    8.97
   9   5   0   28.70   18.63
   9  -5   0   36.64   14.24
   7 -13   3   38.92    9.84
   7  13   3   22.17    9.88
   3   8  18  405.29   80.60
   3  -8  18  428.98   34.29
   2  14  15   55.16   15.77
   2 -14  15   48.51   14.72
   6  -5  14   40.59   13.55
   6   5  14   23.06    9.38
   6  13   8 1596.06   89.27
   6 -13   8 1509.38   90.18
   8   0 -14   22.24   10.86
   9  -5  -6  237.09   45.78
   9   5  -6  381.44   53.13
   4  -2 -21   76.71   19.44
   4   2 -21   64.18   17.92
   2 -18 -11   29.56   12.51
   2  18 -11   43.40   11.58
   1  -2 -22  596.07   38.35
   1   2 -22  665.95   63.10
   5  13  11  139.22   23.92
   5 -13  11   86.47   18.79
   9   0  -9  106.86   23.39
   9   1   3   18.23    9.71
   9  -1   3   27.47   10.33
   8  10   2  344.06   47.56
   8 -10   2  365.71   48.13
   4  19   0    0.80    3.48
   4 -19   0   36.79   22.95
   0 -12  18   34.03   16.33
   0  12  18    3.34    2.63
   6  -9  12  609.16   42.99
   6   9  12  502.37   53.66
   3   8 -20  490.14   54.91
   3  -8 -20  583.81   50.58
   0   6  21  568.62   37.25
   0  -6  21  511.25   99.40
   1  -9 -20  153.70   29.31
   1   9 -20   96.68   27.97
   7  14  -2  993.40   66.59
   7 -14  -2  959.54   32.18
   2  15  14   -4.88   10.42
   2 -15  14   20.86   18.35
   6 -13 -12   64.04   17.54
   6  13 -12   31.97   13.94
   8  -1 -14   12.02    9.98
   8   1 -14   23.99   12.62
   8   4   8 1023.09   62.10
   8  -4   8 1162.68   56.82
   3 -18   8  184.30   25.71
   3  18   8  268.38   53.10
   7 -14  -3  247.63   39.92
   7  14  -3  195.26   40.35
   9   1  -9  753.08   72.40
   9  -1  -9  687.56   98.69
   5 -10 -17  429.64   41.29
   5  10 -17  431.11   50.77
   6   5 -18  162.77   24.75
   6  -5 -18  136.35   33.77
   4  19  -3  424.64   58.48
   4 -19  -3  511.74   65.42
   3  10  17   57.62   24.58
   3 -10  17   47.88   32.07
   3  18 -10   11.62   14.92
   3 -18 -10   59.55   31.92
   8  11  -3  194.53   38.12
   8 -11  -3  135.06   19.53
   0 -21   2  850.00   52.16
   0  21   2  701.74   56.61
   6  -9 -16   24.88   14.10
   6   9 -16  -26.80   28.53
   5  17   4   84.72   14.01
   5 -17   4  154.94   26.68
   8  11  -2   47.68   16.44
   8 -11  -2   22.37    8.97
   0  17  13  103.01   25.21
   0 -17  13  187.89   30.61
   8  -9   4  194.08   34.93
   8   9   4  228.48   33.62
   2   2 -22   85.03   32.76
   2  -2 -22   76.12   16.57
   0  20   7   27.12   14.74
   0 -20   7   15.20   15.12
   7 -14  -1   76.19   22.20
   7  14  -1   58.60   13.71
   8  -6   7  517.05   54.19
   8   6   7  422.95   56.28
   3  10 -19  485.63   54.73
   3 -10 -19  573.84   63.24
   3  20  -1  200.68   35.10
   3 -20  -1  157.50   37.02
   9  -6  -3 1266.94   87.43
   9   6  -3 1365.83   83.27
   2 -19  -9   38.97   15.28
   2  19  -9   35.84   10.61
   5 -11  13  278.62   45.01
   5  11  13  262.38   44.95
   2  13  16    1.30    3.03
   2 -13  16    1.03    3.94
   7  -7 -15  616.21   46.83
   7   7 -15  692.66   38.05
   7  -3  12   55.28   11.86
   7   3  12   23.12    8.19
   7  10   8  391.06   81.54
   7 -10   8  428.59   34.13
   3 -17  10  350.78   46.49
   3  17  10  442.69   68.06
   4  15  11  200.49   29.32
   4 -15  11  227.91   32.26
   7  -5 -16  432.53   39.13
   7   5 -16  549.38   64.89
   1  21   0   39.81   20.76
   1 -21   0   49.16   19.55
   6 -16   1  344.63   68.22
   6  16   1  317.25   40.62
   4 -18  -8   28.09   14.23
   4  18  -8   16.85   14.12
   1 -20  -7  454.46   44.57
   1  20  -7  475.75   81.09
   8 -11  -4  693.43   22.42
   8  11  -4  755.25  103.49
   9   6  -2   11.01   10.60
   9  -6  -2   28.89   15.98
   9   2   3  409.29   38.07
   9  -2   3  459.73   37.65
   7  14  -4  219.14   56.50
   7 -14  -4  254.73   32.98
   3  20   0   66.50   24.18
   3 -20   0   28.04    9.77
   3 -20  -2   31.48   43.90
   3  20  -2   50.98   12.73
   6 -16  -5   17.91   13.92
   6  16  -5   18.50   22.09
   1 -21  -1 2091.30  108.21
   1  21  -1 1965.96  109.23
   7  12 -10  223.66   35.81
   7 -12 -10  252.38   29.46
   9  -6  -4  493.58   61.28
   9   6  -4  658.96   76.94
   1 -19   9    9.05   12.29
   1  19   9   34.46   40.65
   5   8  15  573.28   77.61
   5  -8  15  468.20   35.41
   2  20  -6   16.22    8.32
   2 -20  -6   47.65   35.27
   3  17 -12   45.01   12.28
   3 -17 -12   36.39   26.40
   7 -13  -8  163.32   22.48
   7  13  -8  155.30   22.78
   5  -3 -20   57.14   15.08
   5   3 -20   50.67   12.90
   7   9   9 1405.00   68.91
   7  -9   9 1502.57   66.05
   4  19   1    7.03    4.64
   4 -19   1   54.95   15.80
   5  16 -10   74.60   22.04
   5 -16 -10   74.89   17.61
   8   2 -14   36.69   23.90
   8  -2 -14   29.02   18.06
   8  11  -1  426.01   66.45
   8 -11  -1  397.54   42.27
   2  -9 -20  742.79   58.79
   2   9 -20  604.11   64.58
   9   2  -9 1141.17  120.65
   9  -2  -9 1032.79   25.20
   1 -15  15   18.23    9.88
   1  15  15   17.28    8.96
   7  -6  11   99.70   28.06
   7   6  11  119.13   20.09
   7   0 -17   84.36   24.18
   0   0  22  230.48   28.97
   1  14  16  212.39   44.38
   1 -14  16  263.38   41.98
   1  21   1   20.65   14.71
   1 -21   1   48.22   19.05
   1 -18  11  302.23   33.48
   1  18  11  347.29   51.08
   5 -14  10   25.64    9.86
   5  14  10   22.29   13.95
   5   0  17   35.20   14.16
   8   5 -13   36.51   16.55
   8  -5 -13    6.23    3.55
   4 -11  15   46.57   18.61
   4  11  15   47.45   14.84
   4   3 -21    4.18   18.83
   4  -3 -21   22.40   14.82
   1  -3 -22  409.15   58.34
   1   3 -22  441.18   45.03
   9   4   2  825.25   40.67
   9  -4   2  738.98   69.12
   1 -11 -19   21.13   13.43
   1  11 -19   26.99   12.80
   6   0  15   -4.98   15.48
   7   1 -17  607.80   43.02
   7  -1 -17  519.15   49.44
   0   1  22  144.87   33.29
   0  -1  22  211.86   32.68
   4  19  -4   40.51   13.96
   4 -19  -4   27.16   17.47
   7  14   0   55.21   18.19
   7 -14   0   71.77   17.45
   1 -21  -2   18.67   14.72
   1  21  -2   29.80   22.34
   8   0   9   18.80   10.06
   2  16  13   49.09   31.40
   2 -16  13   71.75   17.25
   7  11   7  889.48   29.74
   7 -11   7 1020.06   37.75
   5  -1  17   12.24    5.69
   5   1  17   26.14   13.35
   9  -4  -8   16.15    9.34
   9   4  -8   18.97   33.07
   9  -5   1   95.88   18.33
   9   5   1   93.22   14.22
   1   7 -21  180.48   21.86
   1  -7 -21  226.69   37.40
   9  -6  -1  739.65   66.71
   9   6  -1  875.67   37.17
   3  14  14   26.07   13.94
   3 -14  14   22.53   16.12
   3 -20   1  365.05   70.37
   3  20   1  317.99   44.36
   4 -13 -16  144.83   31.48
   4  13 -16   98.93   25.24
   2 -18  10  341.14   33.48
   2  18  10  379.28   68.00
   3 -20  -3   34.48   20.32
   3  20  -3   10.37    8.76
   0 -21   3   18.79   10.80
   0  21   3   22.85   12.92
   9   6  -5 1202.33   56.13
   9  -6  -5 1213.79   57.08
   6   1  15   96.77   40.16
   6  -1  15   54.55   13.77
   9   5  -7 1021.84   47.08
   9  -5  -7 1057.19   72.09
   8   1   9  511.47   63.69
   8  -1   9  427.06   31.17
   8 -11  -5   28.62    6.64
   8  11  -5   12.68    6.46
   2  20   5  672.81   49.35
   2 -20   5  817.94   74.46
   3 -14 -16   25.06   18.57
   3  14 -16   31.89   21.26
   6   0 -19   -3.46   14.32
   4  14 -15  129.27   24.15
   4 -14 -15  191.68   30.48
   2 -17 -13   39.01   14.05
   2  17 -13    5.04   10.70
   4 -17   8   32.84   12.13
   4  17   8   33.39   21.69
   8  10  -8   26.22   16.15
   8 -10  -8   61.62   20.99
   5   6  16  375.31   84.35
   5  -6  16  409.31   64.92
   2   3 -22   16.74   14.27
   2  -3 -22   18.50    9.17
   1  10  19   41.31   19.70
   1 -10  19    6.47    9.40
   7  14  -5  431.25   73.02
   7 -14  -5  417.79   36.00
   5  15 -12   12.03   10.29
   5 -15 -12   -4.67   13.08
   5  18  -2  351.34   50.57
   5 -18  -2  299.80   49.90
   2  19   8  100.94   33.93
   2 -19   8   88.93   21.83
   1   5  21  361.74   34.49
   1  -5  21  311.63   52.79
   2   6  20  725.39   55.51
   2  -6  20  649.60   53.73
   0  -9  20    7.34   11.59
   0   9  20   26.99   19.29
   3  13  15 1156.51   70.55
   3 -13  15 1068.72   43.19
   5 -18  -1   38.36   23.37
   5  18  -1   63.55   18.67
   3  -6  19  228.64   34.16
   3   6  19  174.37   26.54
   4   5  18  108.85   22.00
   4  -5  18  126.01   24.82
   1  16  14   33.17   21.70
   1 -16  14    6.04    8.61
   6   1 -19  168.85   24.81
   6  -1 -19  161.75   31.10
   4   9 -19 1293.24   59.66
   4  -9 -19 1284.47   78.01
   8 -11   0   47.34   13.13
   8  11   0   62.61   20.53
   1 -21   2   60.40   15.13
   1  21   2   60.16   23.60
   1  -8  20   44.44   15.93
   1   8  20   -2.32   13.01
   3  15  13   26.81   14.65
   3 -15  13    5.29   25.20
   9   3   3  445.25   40.53
   9  -3   3  498.73   54.92
   7  -2 -17  181.06   30.31
   7   2 -17  145.07   26.40
   0  -2  22  414.17   13.81
   0   2  22  616.82   70.82
   5 -16   7   43.11   23.61
   5  16   7   32.21   16.13
   3 -13 -17   85.73   34.88
   3  13 -17  135.14   23.15
   3 -19   6   42.70   14.73
   3  19   6   21.03   11.44
   1  13  17   69.19   23.00
   1 -13  17   56.85   14.75
   7   8  10   50.80   18.10
   7  -8  10   36.89    9.05
   2  -7 -21  398.64   56.11
   2   7 -21  395.63   37.92
   3  -6 -21  126.30   24.69
   3   6 -21  114.50   21.02
   5  -2  17 1092.79   48.52
   5   2  17 1096.27   88.71
   3  19  -8    6.07   15.16
   3 -19  -8   33.37   20.74
   6 -15   5  105.26   17.79
   6  15   5   84.97   20.64
   8  -3 -14   82.26   14.58
   8   3 -14   73.18   19.94
   3  15 -15  395.59   44.23
   3 -15 -15  473.99   58.46
   4 -19   2  202.58   35.87
   4  19   2  248.80   27.39
   5  18  -3   21.49   12.57
   5 -18  -3   27.29   16.88
   2  11 -19   61.11   13.59
   2 -11 -19   73.13   22.68
   9   3  -9  167.63   53.11
   9  -3  -9  203.23   41.46
   4 -12 -17 1482.98   77.58
   4  12 -17 1530.75   65.27
   8   8 -11   27.48   11.02
   8  -8 -11   34.89   40.15
   6  -2  15   11.17    7.63
   6   2  15   47.04   12.61
   6 -14   7  144.50   42.83
   6  14   7  206.15   35.20
   2  12  17  392.97   49.85
   2 -12  17  353.62   51.94
   1  19 -10   84.93   20.60
   1 -19 -10   54.68   28.65
   4  -7 -20  317.50   52.36
   4   7 -20  369.20   43.68
   6  16   2  138.91   24.98
   6 -16   2  133.28   34.86
   6  15  -9   39.08   15.26
   6 -15  -9   42.54   18.64
   8  -2   9  203.62   29.24
   8   2   9  207.90   37.12
   1  21  -3  171.11   46.95
   1 -21  -3  296.04   41.66
   5 -10  14  357.98   46.86
   5  10  14  346.71   28.66
   3   0  20    2.94    3.79
   5 -17  -8  328.62   32.38
   5  17  -8  280.74   39.56
   7   4  12   39.58   12.60
   7  -4  12   29.45   13.75
   8  10   3  113.29   21.88
   8 -10   3   42.95   18.09
   5 -18   0  253.62   34.26
   5  18   0  200.10   30.18
   6 -16  -6   95.34   20.93
   6  16  -6  106.45   24.33
   8   5   8  844.38   44.81
   8  -5   8  848.50   48.66
   6   8  13  301.30   34.89
   6  -8  13  312.49   42.56
   6  14 -11   99.50   20.15
   6 -14 -11  112.83   19.27
   0 -19  10   60.84   14.26
   0  19  10   86.68   29.13
   7  13   4  220.28   33.49
   7 -13   4  261.17   41.20
   7 -10 -13  151.09   23.96
   7  10 -13  162.33   28.91
   9   6   0  152.06   25.65
   9  -6   0  139.15   60.88
   3   0 -22   10.37   10.03
   3  -1  20   68.04   21.39
   3   1  20   19.57   28.10
   8  -7 -12  576.41   60.67
   8   7 -12  714.79   56.11
   3  20   2  252.77   37.06
   3 -20   2  203.12   26.95
   5  -7 -19   28.07   13.29
   5   7 -19   21.76   22.66
   5   4 -20   41.08   22.44
   5  -4 -20   60.95   13.42
   7  14   1  549.64   63.82
   7 -14   1  638.94   37.53
   2   0  21    2.14    4.37
   3 -20  -4   57.10   25.48
   3  20  -4   37.03   14.27
   6  -6  14  664.21   52.25
   6   6  14  538.40   38.01
   6   2 -19  953.64   58.83
   6  -2 -19  868.03   58.48
   9   6  -6  355.17   40.85
   9  -6  -6  394.15   53.64
   9   0   4   28.47   14.45
   4  18   6  440.52   52.67
   4 -18   6  443.50   47.37
   4 -19  -5   44.98   15.27
   4  19  -5   17.49   10.94
   4 -15 -14  458.85   54.89
   4  15 -14  425.37   43.34
   5  -9 -18   52.76   29.19
   5   9 -18   84.51   15.18
   3  -1 -22   -5.58   17.77
   3   1 -22   41.26   16.07
   6   8 -17  122.29   29.84
   6  -8 -17   99.09   16.97
   0 -11  19  300.23   26.75
   0  11  19  205.16   34.57
   1  20   7   37.59   15.24
   1 -20   7   52.17   18.01
   8  -9 -10 2111.44  113.54
   8   9 -10 2180.99   84.80
   2  -1  21   68.07   25.31
   2   1  21   36.43   11.92
   1 -18 -12   38.79   16.10
   1  18 -12   27.80   14.29
   4  -8  17   12.13   11.96
   4   8  17   20.34   25.30
   8  11  -6    7.29   33.09
   8 -11  -6   22.13   16.32
   4  -4 -21   13.88   16.27
   4   4 -21   81.64   21.85
   1   4 -22  230.51   42.71
   1  -4 -22  335.52   41.45
   7  -9 -14   16.87   10.44
   7   9 -14   37.07   14.15
   4 -16  10   18.09   10.39
   4  16  10   58.28   20.98
   9   0 -10   35.89   21.25
   9   1   4   52.12   10.89
   9  -1   4   52.05   19.12
   6   6 -18 1042.37   50.48
   6  -6 -18 1008.07   40.59
   7 -12   6  417.96   54.82
   7  12   6  332.49   52.01
   5  18  -4   27.24   18.15
   5 -18  -4   11.14   12.88
   7 -11 -12   18.22    7.58
   7  11 -12   39.56   13.68
   0  21   4   22.56   17.80
   0 -21   4   22.86   21.61
   5 -15   9  220.17   37.10
   5  15   9  255.71   45.30
   5 -17   5  492.03   50.90
   5  17   5  407.19   30.73
   3 -12  16  167.24   32.44
   3  12  16  159.61   37.78
   9  -1 -10   56.31   21.57
   9   1 -10   17.49   17.02
   1 -21   3    5.04   10.73
   1  21   3   43.31   14.57
   7  14  -6   16.81   21.17
   7 -14  -6   62.91   14.14
   7  -3 -17   71.66   15.86
   7   3 -17   71.88   16.40
   0  -3  22  785.63   63.73
   0   3  22  720.44   53.90
   8   8   6  407.64   42.98
   8  -8   6  379.73   47.84
   4  17 -11 1389.73   68.99
   4 -17 -11 1347.94   89.68
   0   7  21   21.35   20.78
   0  -7  21   36.18   16.15
   3   2  20   17.54    8.08
   3  -2  20  -13.87   16.45
   5  -3  17  447.32   39.36
   5   3  17  533.81   53.93
   8 -11   1   63.81   17.48
   8  11   1   38.78   17.12
   5  18   1   48.45   17.13
   5 -18   1   30.01   17.08
   3  12 -18   24.04   13.37
   3 -12 -18   80.88   19.47
   1  15 -16  103.05   18.96
   1 -15 -16  111.34   20.43
   0 -18  12   84.88   20.68
   0  18  12   76.91   21.28
   7  -6 -16   22.97   12.58
   7   6 -16   34.26   21.96
   2  -4 -22  464.83   45.28
   2   4 -22  474.36   56.75
   9   5   2   51.37   11.98
   9  -5   2   54.45   18.98
   2  17  12   57.13   13.46
   2 -17  12   40.97   13.75
   6  -3  15  201.77   23.60
   6   3  15  147.12   25.25
   2  20  -7   82.31   23.95
   2 -20  -7  105.60   27.66
   3 -16  12   94.33   25.36
   3  16  12  128.22   30.84
   8  -3   9   44.00   10.34
   8   3   9   40.42   10.39
   3   2 -22  191.81   32.02
   3  -2 -22  132.98   26.82
   2  -2  21  432.18   73.16
   2   2  21  400.48   62.73
   1 -14 -17  113.13   19.17
   1  14 -17  111.12   28.51
   9   5  -8  194.09   36.24
   9  -5  -8  104.34   23.46
   3  16 -14   31.78   24.03
   3 -16 -14   33.23   20.33
   4 -10  16   43.64   15.20
   4  10  16   58.28   24.00
   7 -13  -9  256.68   56.36
   7  13  -9  228.50   45.03
   1  17  13  156.42   43.46
   1 -17  13  124.00   19.01
   9   2   4   37.01   11.81
   9  -2   4   38.23   16.22
   8   7   7   29.81   11.04
   8  -7   7   21.43    7.37
   9   4   3  616.09   32.48
   9  -4   3  701.44   30.50
   8  -9   5  893.98   55.37
   8   9   5  893.38   44.40
   2  -9  19  766.70   72.57
   2   9  19  810.83   69.82
   9  -7  -3  235.04   42.32
   9   7  -3  201.89   39.94
   1 -21  -4  473.94   63.31
   1  21  -4  436.30   41.14
   6 -12  10   24.10    9.13
   6  12  10   40.22   16.93
   6  11  11  538.21   52.83
   6 -11  11  533.33   64.27
   8  -6 -13   31.86   11.81
   8   6 -13    9.75   16.25
   6   3 -19  162.87   32.37
   6  -3 -19  187.18   56.34
   8  -4 -14  389.01   37.92
   8   4 -14  518.23   56.79
   4  19   3  428.31   47.58
   4 -19   3  353.10   34.47
   0 -20   8   57.58   12.33
   0  20   8   75.71   30.06
   4  11 -18  395.82   47.80
   4 -11 -18  449.51   41.74
   9  -4  -9 1127.18   39.37
   9   4  -9 1144.03   72.11
   9  -2 -10  207.46   29.07
   9   2 -10  327.12   53.77
   9  -7  -2  174.18   48.77
   9   7  -2  212.51   35.40
   1 -20  -8  302.57   31.40
   1  20  -8  264.36   34.94
   4  18  -9   11.11   10.61
   4 -18  -9   30.27   15.45
   9  -7  -4   30.98   17.42
   9   7  -4   31.85   15.54
   1  12  18  542.52  109.57
   1 -12  18  610.39   61.72
   6 -12 -14  137.67   31.60
   6  12 -14  156.58   50.90
   3  -9  18  164.47   16.85
   3   9  18  196.11   42.43
   6  11 -15   11.25   17.09
   6 -11 -15   -4.97   12.66
   9   6   1  473.88   33.55
   9  -6   1  521.62   57.44
   1  16 -15 1775.26  107.80
   1 -16 -15 1936.32   86.93
   3 -20   3  667.00   42.01
   3  20   3  641.17   56.24
   5 -13 -15  144.04   37.16
   5  13 -15  143.68   27.86
   7   7  11    0.63    3.87
   7  -7  11   24.57   12.99
   3  20  -5   77.29   26.94
   3 -20  -5   55.49   28.43
   9  -6  -7   20.76   15.97
   9   6  -7   24.80   18.35
   3   9 -20   23.45   10.39
   3  -9 -20   59.85   20.73
   7  -8 -15  138.86   32.05
   7   8 -15  156.93   30.15
   5  18  -5  219.60   40.10
   5 -18  -5  228.59   28.22
   7  14   2  174.44   35.28
   7 -14   2  185.79   51.51
   5  12 -16 1233.82   81.09
   5 -12 -16 1269.10   54.63
   6  16   3  153.33   22.98
   6 -16   3  207.71   37.55
   8 -10  -9  207.31   34.37
   8  10  -9  182.67   30.79
   2  20   6  735.58   50.07
   2 -20   6  884.51   43.57
   2  21  -1  184.81   34.15
   2 -21  -1  149.37   29.02
   6 -16  -7   58.94   16.18
   6  16  -7   36.50   17.47
   1   6  21   34.57   15.38
   1  -6  21   52.40   34.96
   2 -21   0 1456.17   70.44
   2  21   0 1454.97   74.67
   7  12 -11 2296.06   83.15
   7 -12 -11 2331.11   86.54
   0 -15  16   45.64   17.56
   0  15  16   28.02   11.61
   3   3  20   30.15   12.09
   3  -3  20   24.24   23.24
   3 -18   9  579.53   32.49
   3  18   9  629.29   60.67
   4   6  18   39.98   17.47
   4  -6  18   15.80   14.14
   7   5  12  234.23   41.52
   7  -5  12  212.43   25.98
   2 -19 -10  147.52   44.31
   2  19 -10  211.14   27.45
   9   7  -1  760.00   58.39
   9  -7  -1  723.62   67.36
   4 -19  -6  708.55   91.67
   4  19  -6  654.18   58.94
   3 -18 -11   12.84   20.23
   3  18 -11   24.74   14.32
   8  11  -7  964.45   39.78
   8 -11  -7  903.39   88.57
   6 -13   9  813.01   33.24
   6  13   9  863.37   80.82
   9   7  -5  146.39   23.05
   9  -7  -5  156.15   25.64
   4   0  19  -10.00    9.63
   6 -10  12   31.49   15.84
   6  10  12   12.02   14.34
   3  -3 -22  182.06   43.03
   3   3 -22  160.82   26.10
   5 -18   2   53.85   17.31
   5  18   2   53.47   15.32
   1  13 -18  301.48   38.51
   1 -13 -18  371.47   41.01
   1  10 -20  361.62   40.40
   1 -10 -20  445.10   50.56
   2 -15 -16   24.18   33.24
   2  15 -16   29.11   12.16
   5  -5 -20   50.62   15.58
   5   5 -20   45.11   21.97
   2   3  21   20.61   11.62
   2  -3  21   -2.17   16.94
   2  21  -2 1144.90   52.84
   2 -21  -2 1373.30   62.61
   2 -11  18    3.81    9.27
   2  11  18   34.67   23.09
   4  16 -13  303.00   34.71
   4 -16 -13  331.81   35.80
   2  14 -17   26.95    9.92
   2 -14 -17   30.20   14.93
   2  18 -12  219.47   44.15
   2 -18 -12  224.67   41.71
   0  14  17   22.63   14.99
   0 -14  17   54.29   13.50
   5  -7  16   10.41   12.43
   5   7  16    4.48   17.67
   5 -16 -11   66.69   15.27
   5  16 -11   63.19   21.30
   9  -3   4   20.84   11.80
   9   3   4    6.51    7.31
   6  13 -13  689.14   59.67
   6 -13 -13  707.02   62.89
   1  21   4  112.54   34.28
   1 -21   4  184.26   29.74
   7   4 -17  375.37   54.38
   7  -4 -17  418.10   41.04
   0   4  22   29.21   14.04
   0  -4  22   39.92   13.99
   4  -1  19  280.01   62.79
   4   1  19  253.19   36.21
   5 -14 -14  175.01   41.45
   5  14 -14  235.05   45.48
   5   9  15  102.95   21.45
   5  -9  15   19.94    8.92
   2   7  20  385.56   76.57
   2  -7  20  563.68   44.83
   5  -4  17 1777.56   80.23
   5   4  17 1713.50   87.21
   2  21   1   46.08   21.76
   2 -21   1   36.97   15.97
   3  -7  19  912.90   93.40
   3   7  19  850.78   52.54
   6 -10 -16   36.84   12.54
   6  10 -16   52.34   20.90
   0  16  15  351.61   30.65
   0 -16  15  419.28   73.06
   1   8 -21  378.66   32.15
   1  -8 -21  487.30   67.98
   4  -5 -21  401.51   55.58
   4   5 -21  424.78   70.03
   8   6   8   78.86   12.07
   8  -6   8   33.94    6.93
   0  21   5   73.92   21.82
   0 -21   5   48.68   17.18
   7 -14  -7 1426.34   60.36
   7  14  -7 1421.48   78.31
   1  -5 -22   -0.81   15.52
   1   5 -22   14.13    6.25
   7   0  13  463.62   33.61
   8 -10   4  682.59   66.20
   8  10   4  680.95   62.93
   9  -3 -10  856.97   36.63
   9   3 -10  940.69   36.71
   6  -4  15   50.52   22.70
   6   4  15  127.45   24.94
   8 -11   2  309.79   36.49
   8  11   2  297.20   45.75
   8   4   9  686.53   32.75
   8  -4   9  678.66   41.95
   1  19  10  355.15   84.05
   1 -19  10  306.45   41.17
   3  -7 -21   39.99   15.17
   3   7 -21   16.02   10.05
   8   0 -15    6.02    6.74
   7   1  13   36.54   11.41
   7  -1  13   45.19   14.67
   5 -11 -17   51.07   18.81
   5  11 -17  119.77   25.41
   5 -17  -9   53.99   16.88
   5  17  -9   44.38   15.05
   3  19   7   12.15    5.59
   3 -19   7   25.40   11.97
   3 -11  17  487.42   67.81
   3  11  17  467.91   68.31
   6 -15   6   43.79   17.00
   6  15   6   87.71   25.01
   7  10   9   32.09   14.97
   7 -10   9    2.04    6.31
   3 -19  -9  734.38   69.51
   3  19  -9  692.00   70.26
   1   0  22    9.91    5.13
   8  -1 -15   83.13   17.92
   8   1 -15   20.86   10.00
   6   4 -19   69.82   22.68
   6  -4 -19   65.29   19.95
   7  13   5    3.21    8.54
   7 -13   5   42.50   21.75
   2 -10 -20   19.36   18.76
   2  10 -20   19.83   18.76
   1  21  -5  822.94   41.93
   1 -21  -5  616.78   91.99
   2  -5 -22   21.00   28.09
   2   5 -22   65.48   16.78
   2  21  -3   52.49   22.34
   2 -21  -3   30.73   28.90
   4  14  13   55.08   15.05
   4 -14  13   57.26   12.43
   2  16 -15   26.97   17.96
   2 -16 -15   63.25   19.57
   3 -11 -19  911.98   87.76
   3  11 -19  843.69   73.65
   4   2  19   70.99   28.75
   4  -2  19   85.22   26.77
   6 -15 -10  896.57   39.54
   6  15 -10  912.08  103.12
   9   7   0    8.80    4.02
   9  -7   0   25.26   15.95
   2  -8 -21   58.14   21.20
   2   8 -21   26.35   11.28
   4  13  14 1107.38   57.54
   4 -13  14 1203.73   93.55
   1 -17 -14  398.55   34.47
   1  17 -14  365.89   29.37
   7  11   8   50.96   23.77
   7 -11   8   10.30    7.37
   6   7  14  167.20   32.81
   6  -7  14  110.50   21.36
   1   1  22   -9.01    7.61
   1  -1  22   38.01   14.87
   9  -7  -6  488.19   57.40
   9   7  -6  578.22   72.68
   2  13 -18   64.22   20.38
   2 -13 -18   84.54   16.99
   3 -17  11  278.96   36.89
   3  17  11  233.89   42.66
   9   5   3   22.74    7.63
   9  -5   3   24.54   11.05
   2 -19   9  411.15   36.21
   2  19   9  535.78   90.36
   5  13  12  199.75   32.75
   5 -13  12  173.31   38.54
   4   8 -20   85.90   24.19
   4  -8 -20   87.54   18.78
   8 -12  -3  189.80   41.84
   8  12  -3  179.29   32.81
   2 -21   2   13.22    8.38
   2  21   2  -14.21   19.81
   3  17 -13   41.83   14.71
   3 -17 -13   65.88   23.10
   5  18  -6  345.66   43.69
   5 -18  -6  385.71   39.02
   8 -12  -2    9.42    8.48
   8  12  -2   43.04   20.21
   8  -5 -14  159.52   27.24
   8   5 -14  140.81   45.35
   4  19   4   31.29   12.89
   4 -19   4   39.15   11.19
   1   9  20  209.26   46.70
   1  -9  20  226.46   30.69
   9   0   5  625.68   41.37
   9  -5  -9 1479.26   65.58
   9   5  -9 1593.75   70.97
   7   2  13  226.31   27.09
   7  -2  13  318.80   70.62
   9  -6   2   85.23   19.96
   9   6   2   68.15   14.76
   4  17   9   27.50   22.98
   4 -17   9   11.63   11.51
   5 -16   8    9.77    6.70
   5  16   8   28.41   11.74
   6   7 -18  509.99   49.84
   6  -7 -18  389.13   48.32
   3  20   4   79.70   15.12
   3 -20   4   88.41   16.81
   0 -13  18   93.03   18.03
   0  13  18   59.98   24.88
   7  -9  10  335.62   38.48
   7   9  10  316.79   56.76
   5  12  13   89.81   35.75
   5 -12  13   79.61   20.97
   3   4  20   19.86   13.40
   3  -4  20   10.32   13.03
   8   8 -12  335.83   46.97
   8  -8 -12  336.85   47.21
   3 -20  -6   83.84   27.59
   3  20  -6   60.17   17.96
   5  -8 -19  608.11   70.67
   5   8 -19  662.40   71.86
   4 -18   7    2.43    7.55
   4  18   7   40.34   23.12
   8   2 -15  138.14   22.48
   8  -2 -15  237.31   25.10
   9   6  -8  555.85   56.46
   9  -6  -8  436.53   67.36
   9   1   5   23.67    9.60
   9  -1   5   20.88   14.02
   1 -20   8   23.03   11.34
   1  20   8   41.71   23.26
   9   0 -11   31.91   14.75
   8  -9 -11   33.22   19.74
   8   9 -11   56.72   26.51
   8 -12  -4  226.69   29.40
   8  12  -4  270.06   61.83
   5 -17   6   29.31   13.78
   5  17   6   13.34    6.67
   1 -18  12   94.27   19.70
   1  18  12  118.46   24.01
   3   4 -22  248.56   31.32
   3  -4 -22  168.20   47.49
   7  14   3   60.62   13.78
   7 -14   3   47.97   24.92
   0  10  20  241.52   35.68
   0 -10  20  239.31   38.55
   4 -15  12   65.23   40.53
   4  15  12   48.70   23.11
   2   4  21   35.70   12.94
   2  -4  21   32.64   11.20
   2  18  11   53.92   18.84
   2 -18  11   71.47   14.11
   1  -2  22   95.21   23.53
   1   2  22   32.15   16.72
   4 -10 -19  153.93   27.40
   4  10 -19  113.02   22.06
   6  14   8   59.38   14.74
   6 -14   8   24.41    7.58
   8 -12  -1  103.55   24.25
   8  12  -1   68.50   50.43
   2  20  -8  438.87   53.09
   2 -20  -8  492.08   62.66
   7  -7 -16   23.72   12.54
   7   7 -16   55.23   23.85
   0 -17  14   37.09   15.21
   0  17  14   21.61   12.24
   5  14  11   22.15   14.36
   5 -14  11    0.87   12.47
   9  -1 -11   63.61   22.11
   9   1 -11   91.64   25.91
   6   9  13  323.28   36.73
   6  -9  13  319.86   47.24
   9  -4   4   22.14   12.42
   9   4   4   17.52    8.83
   5  18   3   35.74   12.87
   5 -18   3   38.55   15.35
   5 -15 -13   41.98   12.02
   5  15 -13   28.12   18.00
   6 -14 -12  240.81   40.95
   6  14 -12  241.88   31.71
   4 -12  15 2307.75  112.23
   4  12  15 2238.20   79.01
   6  16   4   15.49    8.40
   6 -16   4   43.18   24.92
   6  17  -2  212.58   35.83
   6 -17  -2  232.87   33.38
   8   0  10  131.20   30.76
   8 -11  -8  340.33   62.98
   8  11  -8  290.44   31.32
   9   4 -10   52.82   22.87
   9  -4 -10   25.67   12.36
   1  12 -19   56.87   13.89
   1 -12 -19   90.78   17.98
   1  19 -11   19.12   26.05
   1 -19 -11   40.95   16.54
   1 -11  19   59.48   17.31
   1  11  19   52.18   17.85
   4   3  19  134.38   20.65
   4  -3  19  118.66   22.27
   7 -13 -10   27.03   17.41
   7  13 -10   29.76   13.91
   2 -21  -4  297.19   43.08
   2  21  -4  262.20   35.67
   6 -16  -8  207.67   29.39
   6  16  -8  203.95   34.82
   0  -8  21   20.85   10.38
   0   8  21   41.43   35.38
   6   9 -17 1088.15   49.02
   6  -9 -17 1013.11   58.31
   7 -12   7   18.87   15.01
   7  12   7   47.42   23.77
   4  19  -7  376.63   43.41
   4 -19  -7  399.57   40.36
   2  15  15    7.06    9.31
   2 -15  15   34.32   21.77
   6 -17  -1   74.83   17.02
   6  17  -1   37.55    9.25
   8  -7 -13   36.54   20.11
   8   7 -13   30.14   23.29
   6 -17  -3  224.37   27.01
   6  17  -3  144.92   29.71
   4  -9  17  162.04   40.25
   4   9  17  230.08   36.04
   8   1  10  107.96   22.99
   8  -1  10  139.61   22.51
   9  -2   5  431.66   59.91
   9   2   5  552.47   42.25
   1 -21   5   42.71   18.17
   1  21   5   14.94    9.43
   7  -5 -17   23.66   16.44
   7   5 -17   44.91   22.39
   0   5  22   53.95   21.91
   0  -5  22   99.97   29.18
   5   0 -21   89.02   25.14
   2  14  16   18.88    7.73
   2 -14  16   47.14   29.82
   8 -12  -5 1956.21   77.12
   8  12  -5 2022.71   92.57
   5  -5  17   11.93   15.43
   5   5  17   20.12   11.45
   7  15  -2   94.56   27.53
   7 -15  -2  109.99   17.79
   7   6  12  207.74   39.69
   7  -6  12  239.45   34.20
   0  19  11   41.00   15.80
   0 -19  11   22.46   15.79
   9   7   1  114.88   16.80
   9  -7   1  136.73   34.91
   7  15  -3   80.89   40.35
   7 -15  -3  137.58   30.86
   7   3  13   26.15   11.37
   7  -3  13    1.61   12.63
   9   2 -11  617.56  103.31
   9  -2 -11  481.60   58.53
   8   8   7   99.85   23.31
   8  -8   7   84.92   27.72
   6  -5  15  292.06   62.28
   6   5  15  321.61   39.44
   8  -9   6   94.33   17.65
   8   9   6  136.69   22.64
   9   8  -3  176.20   28.64
   9  -8  -3  109.13   23.98
   9  -7  -7 1704.92   87.90
   9   7  -7 1741.68   68.04
   2 -21   3   15.11   17.57
   2  21   3   45.72   18.96
   5 -10 -18   24.98   15.20
   5  10 -18   19.74   13.64
   8   5   9  257.22   32.76
   8  -5   9  287.02   31.59
   5 -11  14   81.23   24.39
   5  11  14  119.51   25.30
   5  -1 -21 1847.51   86.71
   5   1 -21 1682.12  118.15
   7  14  -8   99.29   18.19
   7 -14  -8  115.38   42.99
   8 -10 -10   37.27   24.13
   8  10 -10   46.44   19.81
   2 -17 -14   32.05   18.13
   2  17 -14   14.95   15.88
   5   6 -20  177.34   37.39
   5  -6 -20  202.78   33.12
   8  11   3 1239.32   67.42
   8 -11   3 1434.12   59.54
   8  -3 -15  546.93   37.25
   8   3 -15  549.77   95.31
   8 -12   0   49.32   14.60
   8  12   0   30.08   11.07
   7 -10 -14   21.73   15.11
   7  10 -14   26.29   14.02
   0 -21   6  119.07   27.01
   0  21   6  119.40   25.61
   7  15  -1  406.55   55.56
   7 -15  -1  387.44   38.37
   9  -8  -2  303.41   35.32
   9   8  -2  279.39   34.58
   2  20   7    9.83   12.29
   2 -20   7   21.90    8.82
   7 -11 -13  119.00   19.30
   7  11 -13   77.01   21.70
   9   8  -4  539.08   54.94
   9  -8  -4  480.26   64.82
   1 -20  -9  205.68   32.47
   1  20  -9  206.70   35.63
   1   7  21 1588.25   74.44
   1  -7  21 1640.23   89.02
   4  18 -10   85.11   18.99
   4 -18 -10   63.42   16.99
   6 -17   0   31.20    9.70
   6  17   0   40.93   16.28
   6  17  -4  386.91   62.79
   6 -17  -4  444.55   50.02
   4   7  18  355.08   43.65
   4  -7  18  281.42   40.00
   2 -16  14   35.55   14.57
   2  16  14   28.97   13.47
   0 -20   9   55.07   15.18
   0  20   9   48.06   13.22
   1   3  22   28.75   13.26
   1  -3  22   31.23   14.65
   6  -5 -19    8.22   16.63
   6   5 -19   12.32   12.17
   4   6 -21 1178.76   77.73
   4  -6 -21 1404.88  163.46
   8  -2  10  280.86   32.18
   8   2  10  250.71   45.86
   1  -6 -22   16.67   37.38
   1   6 -22    9.17    5.47
   2  12 -19   14.65   13.46
   2 -12 -19   34.67   14.85
   7   8  11   34.43   12.18
   7  -8  11   53.23   14.21
   7  15  -4   90.62   21.27
   7 -15  -4   39.79   16.91
   4  17 -12   69.78   18.82
   4 -17 -12  105.16   26.19
   7   0 -18   17.57   15.95
   1  21  -6   14.39   13.85
   1 -21  -6   20.33   23.98
   4 -14 -16   33.86   15.25
   4  14 -16   40.82   12.71
   4   0 -22 1711.58  123.38
   7  -1 -18   24.83   14.82
   7   1 -18    6.31   16.57
   1  15  16   16.11   10.85
   1 -15  16   31.22    8.71
   5   2 -21 1006.84   75.40
   5  -2 -21 1023.18   67.00
   5  15  10  203.29   35.92
   5 -15  10  195.68   34.06
   5  18  -7   24.97   10.25
   5 -18  -7   65.94   19.68
   9  -8  -1  640.15   91.70
   9   8  -1  654.42   38.56
   8   7   8  201.33   29.50
   8  -7   8  244.66   34.29
   9  -3   5   95.30   25.89
   9   3   5   72.59   15.65
   4  16  11   15.29   10.57
   4 -16  11   -1.17   12.48
   2   6 -22   23.52    8.31
   2  -6 -22   25.64   31.59
   4 -13 -17  615.24   53.02
   4  13 -17  509.14   48.98
   9   8  -5   14.25   11.09
   9  -8  -5   31.28   30.87
   4  -1 -22  730.93   74.11
   4   1 -22  691.47   53.36
   8 -10   5   21.15    8.73
   8  10   5    0.77   11.35
   2  10  19  230.77   61.64
   2 -10  19  179.00   28.84
   2  13  17   33.03   26.50
   2 -13  17   38.57   17.49
   1  18 -13   88.68   23.08
   1 -18 -13   93.68   19.99
   7  15   0   77.41   16.22
   7 -15   0   31.59   15.92
   3   5  20  584.93   36.30
   3  -5  20  563.99   36.53
   0 -12  19   47.14   13.91
   0  12  19   46.04   21.41
   7  -9 -15   20.61   13.90
   7   9 -15   16.70   16.56
   3 -14  15   54.83   19.72
   3  14  15    0.95    6.56
   8 -12  -6  540.09   36.88
   8  12  -6  584.15   70.23
   3 -15  14  186.35   40.11
   3  15  14  196.70   26.24
   5   8  16   72.51   28.10
   5  -8  16   37.12   15.23
   9  -3 -11  147.57   46.48
   9   3 -11  200.75   35.69
   1  16  15   45.41   27.81
   1 -16  15   41.66   13.60
   9   6   3  704.75   69.68
   9  -6   3  603.70   52.57
   4  -4  19   32.56   14.83
   4   4  19   31.21   19.96
   3  14 -17  815.94   58.97
   3 -14 -17  742.00   83.30
   3 -20   5  151.81   27.79
   3  20   5  154.20   25.39
   7 -12 -12   36.87   16.32
   7  12 -12   45.13   20.78
   2  21  -5   53.16   14.81
   2 -21  -5   31.74   34.55
   1 -14  17   68.78   16.64
   1  14  17   96.89   29.28
   3   5 -22  206.49   28.19
   3  -5 -22  193.95   38.76
   2  -8  20  539.42   54.28
   2   8  20  516.36   53.49
   3 -10  18  383.33   76.26
   3  10  18  514.22   43.35
   4  19   5  322.32   37.11
   4 -19   5  276.92   36.17
   3   8  19  203.90   39.56
   3  -8  19  201.63   28.66
   2   5  21   49.64   15.95
   2  -5  21   14.01   25.39
   3 -15 -16   23.91   16.54
   3  15 -16   17.68   13.88
   3  20  -7  274.88   34.47
   3 -20  -7  281.73   34.52
   4  15 -15  157.10   24.18
   4 -15 -15  238.56   34.98
   8  -6 -14   54.63    9.89
   8   6 -14   60.71   35.40
   4  11  16   59.43   39.22
   4 -11  16   67.29   23.23
   6  17   1  141.97   34.94
   6 -17   1   91.93   29.25
   9   6  -9  327.89   40.71
   9  -6  -9  207.50   53.36
   9  -5   4   92.29   22.94
   9   5   4   97.15   27.13
   7 -15  -5   20.42   11.50
   7  15  -5   14.56   13.61
   6  17  -5   57.04   19.23
   6 -17  -5   14.29   14.32
   7  -2 -18    3.47   14.92
   7   2 -18   12.16   11.23
   3  10 -20  144.70   25.53
   3 -10 -20  124.70   34.75
   3  -8 -21   21.75   15.51
   3   8 -21   32.96   13.67
   8  12   1  124.70   23.54
   8 -12   1   57.37   16.29
   5  18   4  518.74   48.57
   5 -18   4  537.01   65.58
   5  17 -10  475.83   54.89
   5 -17 -10  520.10   87.89
   8   3  10  926.36   62.97
   8  -3  10  988.91   41.19
   2  19 -11   83.51   37.89
   2 -19 -11  113.92   25.23
   1   0 -23   17.32   11.08
   7   4  13  379.97   44.83
   7  -4  13  407.03   51.73
   0 -18  13   46.18   16.16
   0  18  13   46.14   17.01
   9  -5 -10  255.96   43.99
   9   5 -10  339.09   64.36
   4   2 -22 1155.72   72.44
   4  -2 -22 1100.15   59.28
   7  14   4  144.40   23.72
   7 -14   4  169.43   34.79
   7 -13   6   73.44   21.00
   7  13   6  115.60   22.08
   6   0  16 2465.96  118.51
   8   4 -15  202.31   39.42
   8  -4 -15  209.55   39.41
   4 -20  -1   69.94   26.00
   4  20  -1   36.37   12.01
   1   9 -21    6.95    4.95
   1  -9 -21   52.39   17.86
   3  18  10   56.60   18.20
   3 -18  10   25.11   17.10
   3 -19   8  618.72   37.05
   3  19   8  667.08   69.15
   1   1 -23   89.87   18.10
   1  -1 -23   32.07   15.93
   3 -13  16   77.25   21.41
   3  13  16   72.51   17.88
   9   7   2   11.66   12.65
   9  -7   2   18.36    4.74
   2 -21   4   18.08   20.97
   2  21   4   32.96   12.92
   4  20  -2  200.16   24.75
   4 -20  -2  290.73   40.22
   6 -15   7   37.66   17.30
   6  15   7   22.83   19.14
   5 -16 -12   84.15   23.06
   5  16 -12   66.87   21.17
   3 -19 -10  232.31   51.84
   3  19 -10  283.52   34.02
   3 -18 -12  153.63   27.66
   3  18 -12  126.63   21.48
   6 -12  11  258.34   33.64
   6  12  11  224.45   46.01
   9  -8   0   31.53   17.80
   9   8   0   44.01   12.04
   2   0 -23   14.17   13.12
   6  -1  16   29.45   10.59
   6   1  16   39.96   13.66
   2  17  13   15.70   21.77
   2 -17  13    8.95    6.80
   5   3 -21  151.41   37.96
   5  -3 -21  145.61   26.86
   6   8  14  154.42   54.74
   6  -8  14  219.78   30.92
   1  -4  22  131.88   33.48
   1   4  22  151.44   26.09
   9  -7  -8  128.78   22.69
   9   7  -8  115.32   25.59
   8 -11  -9   68.68   24.72
   8  11  -9   57.16   20.84
   9  -8  -6  145.59   28.61
   9   8  -6  205.80   29.76
   3 -13 -18   42.69   13.82
   3  13 -18   45.18   15.04
   4  12 -18   13.42   12.94
   4 -12 -18   44.67   19.19
   6 -15 -11  598.44   67.75
   6  15 -11  681.13   69.86
   3 -16  13   19.51   32.60
   3  16  13   22.54    9.78
   6   0 -20  726.96  104.69
   4  20   0  135.38   31.63
   4 -20   0  114.92   31.07
   5 -10  15  286.72   50.56
   5  10  15  280.40   40.74
   2  -1 -23   -0.29   11.90
   2   1 -23   11.87    8.81
   7 -15   1  433.90   77.22
   7  15   1  496.90   45.97
   6  12 -15  444.04   58.01
   6 -12 -15  468.03   47.54
   6 -16   5  108.70   23.34
   6  16   5   41.89   17.01
   3 -16 -15   99.81   22.26
   3  16 -15   61.10   19.46
   1  21   6  138.61   28.86
   1 -21   6  169.49   30.63
   5   0  18   -0.83    8.09
   4 -19  -8  131.79   24.15
   4  19  -8  128.87   22.31
   6  -1 -20  137.23   26.70
   6   1 -20  154.42   36.88
   7   6 -17   11.30   14.96
   7  -6 -17   27.52   13.84
   6  -8 -18  489.96   54.18
   6   8 -18  559.25   73.87
   0  -6  22  226.91   41.51
   0   6  22  228.28   58.26
   4 -20  -3   10.70   28.88
   4  20  -3   -6.72    7.65
   6  11  12   12.77   10.66
   6 -11  12   25.05   12.61
   6 -13  10  948.64   27.29
   6  13  10 1058.01   41.55
   6 -16  -9   57.59   18.17
   6  16  -9    5.17    5.11
   2   9 -21   32.26   10.95
   2  -9 -21   27.82   22.63
   1 -11 -20   43.61   13.76
   1  11 -20    5.45    8.47
   9   0   6   19.48   11.57
   5   6  17   58.87   19.05
   5  -6  17   14.96   10.48
   1 -17  14   48.62   10.03
   1  17  14   25.83   13.94
   0 -22   0 1018.77   60.02
   0  22   0  997.30   59.31
   9  -4   5  312.77   51.96
   9   4   5  377.64   48.42
   5   1  18   20.94   12.97
   5  -1  18    7.74    9.88
   1  -2 -23  351.59   41.51
   1   2 -23  319.88   51.97
   6  -6  15  221.05   47.85
   6   6  15  321.55   40.15
   7  -3 -18  111.15   21.36
   7   3 -18  243.36   38.35
   5  17   7   59.26   23.20
   5 -17   7   14.06   16.83
   2 -20  -9   15.61   10.70
   2  20  -9   -6.32   20.75
   4  -9 -20  127.61   27.88
   4   9 -20  150.73   34.90
   1  13  18   39.35   21.77
   1 -13  18   24.68   11.70
   8  -6   9   30.27    8.66
   8   6   9   39.01   11.01
   6   2  16  332.53   41.70
   6  -2  16  313.73   53.11
   6 -13 -14  214.15   36.45
   6  13 -14  261.55   40.79
   1 -19  11   33.10   11.09
   1  19  11   29.42   11.94
   9  -1   6   79.71   16.33
   9   1   6   74.25   14.13
   6 -11 -16  283.28   35.67
   6  11 -16  307.94   43.20
   0 -22   1  330.85   44.39
   0  22   1  360.69   41.81
   9   0 -12   -5.07   24.81
   2 -18 -13   29.67   22.40
   2  18 -13   15.66   18.85
   4  18   8   50.13   20.93
   4 -18   8   24.51    8.13
   7  -8 -16   41.88   13.29
   7   8 -16   28.92   21.24
   7  14  -9  150.69   27.53
   7 -14  -9  157.68   34.18
   8  12  -7   11.26    8.10
   8 -12  -7   13.20    9.13
   8  11   4  661.60   68.53
   8 -11   4  755.03   51.69
   9  -4 -11 1457.76   96.70
   9   4 -11 1522.17   81.68
   7  15  -6  317.63   79.18
   7 -15  -6  439.98   65.06
   4   3 -22  986.37   50.66
   4  -3 -22  945.07   65.30
   1 -20   9 1368.95   80.96
   1  20   9 1476.57  103.42
   4  16 -14  102.17   25.16
   4 -16 -14  119.69   23.27
   6  17   2  431.91   50.82
   6 -17   2  411.92   36.54
   2   2 -23   21.21   14.19
   2  -2 -23   10.70   12.84
   8  -9 -12  324.09   52.61
   8   9 -12  332.96   50.76
   5   9 -19   93.87   18.52
   5  -9 -19   96.09   22.15
   4 -20   1   63.47   36.30
   4  20   1  125.30   23.68
   7  -7  12 2038.05  101.78
   7   7  12 1862.04   82.89
   5 -13 -16  242.55   52.00
   5  13 -16  323.32   33.76
   6   6 -19  190.10   37.08
   6  -6 -19  191.75   31.83
   6  17  -6   53.32   18.84
   6 -17  -6  107.01   31.14
   9  -1 -12  203.31   55.83
   9   1 -12  269.35   41.65
   2  12  18    4.37   25.47
   2 -12  18    8.20    6.33
   2  19  10   25.98   16.82
   2 -19  10   24.61    8.95
   0 -21   7    1.46   10.57
   0  21   7   19.65   14.85
   6  -2 -20  339.69   41.96
   6   2 -20  271.39   44.48
   3 -21  -1  266.07   31.86
   3  21  -1  294.48   35.66
   7  13 -11   72.71   21.11
   7 -13 -11   66.79   19.71
   5  -7 -20 1251.76   64.59
   5   7 -20 1276.25   62.58
   7  11   9  292.12   32.44
   7 -11   9  254.72   34.36
   8   8 -13  333.43   48.09
   8  -8 -13  275.58   39.40
   1 -15 -17 1027.93   72.67
   1  15 -17 1104.89   75.21
   2 -11 -20   70.73   27.84
   2  11 -20   55.36   14.58
   8  -4  10   53.56   13.41
   8   4  10   71.69   25.15
   1  10  20  139.81   31.45
   1 -10  20  137.96   31.33
   5 -16   9   98.67   24.57
   5  16   9   69.77   28.49
   5  -2  18 1188.44   89.20
   5   2  18 1272.39   64.48
   1  21  -7   57.81   19.18
   1 -21  -7   61.12   19.07
   5  14 -15  707.85   47.43
   5 -14 -15  685.24   54.17
   8 -12   2   27.24    9.53
   8  12   2   -7.06   22.92
   3  21   0   26.50   12.13
   3 -21   0   14.73    6.88
   4   5  19   13.18   19.33
   4  -5  19    8.36   14.90
   3  21  -2  183.34   23.53
   3 -21  -2  172.86   39.76
   5 -19  -2  177.65   56.40
   5  19  -2  133.67   33.15
   4  20  -4   14.50    8.66
   4 -20  -4   59.84   26.44
   2 -21  -6   25.44   28.41
   2  21  -6    7.14   13.98
   7 -10  10   24.10    9.62
   7  10  10   14.81   13.75
   0 -22   2   15.80   15.63
   0  22   2   28.06   22.32
   5 -18  -8  152.51   29.67
   5  18  -8  136.53   24.42
   9  -2   6  181.97   37.85
   9   2   6  157.71   19.45
   5 -19  -1   37.39   25.92
   5  19  -1   45.86   20.41
   9   8   1  304.73   37.25
   9  -8   1  252.51   31.62
   4  -7 -21   60.82   29.22
   4   7 -21   67.23   13.87
   1 -16 -16   15.95   14.70
   1  16 -16   12.07   14.49
   1  -7 -22   49.66   19.69
   1   7 -22   47.41   21.64
   4  17  10   48.42   25.04
   4 -17  10   53.54   17.21
   8 -10 -11  391.85   57.55
   8  10 -11  458.19   40.05
   5 -12 -17   24.22   11.27
   5  12 -17   39.23   16.92
   3  12  17  288.06   41.48
   3 -12  17  297.92   62.71
   9   8  -7   19.17   13.18
   9  -8  -7   15.74   20.76
   0  -9  21   29.76   14.35
   0   9  21   34.04   21.15
   3  -6  20   17.87   22.32
   3   6  20   25.43   18.51
   5  -4 -21   49.86   13.04
   5   4 -21   59.21   21.00
   8   0 -16  280.87   49.41
   0   0  23    9.95    9.47
   9  -2 -12  206.72   47.37
   9   2 -12  294.97   41.38
   5 -19  -3  168.24   33.07
   5  19  -3   78.74   25.57
   1 -22   0  102.22   23.34
   1  22   0   80.33   26.24
   1  -3 -23   96.18   24.61
   1   3 -23  100.54   20.52
   7   5  13   10.31    7.89
   7  -5  13  -16.05   16.63
   6  10  13  358.78   39.81
   6 -10  13  358.14   32.48
   6  14   9  322.07   48.68
   6 -14   9  295.41   35.27
   3 -12 -19  638.37   57.19
   3  12 -19  604.62   56.87
   1  22  -1   15.01   19.68
   1 -22  -1   35.99   20.58
   2 -20   8  571.90   50.89
   2  20   8  701.67   60.21
   1   8  21  274.76   45.76
   1  -8  21  291.02   46.02
   3   6 -22   38.09   12.90
   3  -6 -22   70.23   24.88
   6   3  16  494.73   52.22
   6  -3  16  447.07   34.94
   1 -14 -18  340.55   44.13
   1  14 -18  262.16   40.13
   8  -1 -16   52.70   13.60
   8   1 -16   68.29   16.34
   4   8  18  442.58   39.92
   4  -8  18  447.91   52.83
   2  -6  21    9.50   22.21
   2   6  21   16.16   14.10
   7 -15   2   23.79   12.47
   7  15   2   29.94   14.21
   7  12   8  112.13   26.29
   7 -12   8   92.19   13.75
   5  19   0   29.50   16.27
   5 -19   0   40.56   32.11
   8  -5 -15    5.13    6.47
   8   5 -15   20.68   16.37
   0   1  23  189.71   53.45
   0  -1  23  203.43   28.99
   3 -21   1   34.90   12.59
   3  21   1   39.99   13.38
   3  21  -3  511.85   46.24
   3 -21  -3  554.39   87.41
   2  -7 -22  728.06   68.94
   2   7 -22  633.58   41.93
   9   6   4  229.91   31.69
   9  -6   4  211.52   25.20
   8   9   7   36.47   10.84
   8  -9   7   37.47    9.19
   6  14 -13  404.09   33.91
   6 -14 -13  366.26   44.20
   3 -17  12   29.05   24.66
   3  17  12   20.22   22.99
   9   9  -3   18.76   10.22
   9  -9  -3   37.10   30.18
   3  20   6  383.22   53.49
   3 -20   6  368.50   49.47
   2  -3 -23   94.83   18.54
   2   3 -23   76.33   18.59
   1 -22   1 2113.65   94.83
   1  22   1 1991.84   83.75
   6  10 -17   94.08   20.35
   6 -10 -17   49.53   20.08
   0 -11  20   85.83   20.69
   0  11  20   91.91   26.58
   2  21   5   77.60   17.49
   2 -21   5   90.67   24.30
   1   5  22    8.97   18.71
   1  -5  22   29.06   25.99
   4  11 -19   27.56   15.65
   4 -11 -19   54.84   19.68
   3  20  -8  219.86   35.99
   3 -20  -8  263.27   36.12
   4 -10  17   38.56   19.22
   4  10  17   33.94   24.85
   3  17 -14   20.03    8.40
   3 -17 -14   55.20   17.25
   4 -20   2  366.62   50.07
   4  20   2  335.15   43.25
   5  18   5   20.10   10.55
   5 -18   5   35.10   24.41
   9  -6 -10   31.43    9.86
   9   6 -10  -14.47   15.51
   6  -3 -20  112.23   25.65
   6   3 -20   91.67   28.18
   9  -9  -2  513.44   61.13
   9   7   3   61.53   17.29
   9   9  -2  480.53   34.11
   9  -7   3   39.33   10.35
   4  19   6   15.10   15.21
   4 -19   6   25.59    9.42
   7  -4 -18  225.44   36.62
   7   4 -18  207.73   34.94
   9  -9  -4   47.58   19.10
   9   9  -4   42.57   12.06
   1 -20 -10  282.65   44.46
   1  20 -10  337.45   35.59
   4 -18 -11   19.36   13.86
   4  18 -11   10.77   20.29
   1 -22  -2  361.61   49.45
   1  22  -2  428.47   55.29
   1 -19 -12   86.54   26.48
   1  19 -12   87.58   25.40
   8   7 -14  472.14   57.41
   8  -7 -14  331.51   50.13
   8   8   8  572.02   50.14
   8  -8   8  460.86   62.28
   2  15 -17  232.95   44.37
   2 -15 -17  287.00   34.89
   0  15  17    7.53    9.94
   0 -15  17   33.93    9.78
   5  -3  18  117.78   24.71
   5   3  18  137.12   28.22
   9   7  -9  112.09   20.84
   9  -7  -9   65.24   23.12
   0 -22   3   28.56   14.83
   0  22   3   28.35   22.96
   7   9  11  343.14   51.83
   7  -9  11  361.63   34.71
   2  18  12  573.18   52.93
   2 -18  12  518.17   73.95
   4   4 -22  402.73   54.26
   4  -4 -22  328.31   44.90
   3   0  21  838.08   52.32
   0  20  10  242.11   31.71
   0 -20  10  152.15   32.91
   8  10   6 1285.78   68.73
   8 -10   6 1306.45   62.33
   5 -15 -14  247.80   46.32
   5  15 -14  257.84   35.04
   5 -19  -4   23.98   23.12
   5  19  -4   24.43   14.86
   0 -16  16   25.10   17.23
   0  16  16   40.98   14.98
   8  13  -3  161.94   49.23
   8 -13  -3  231.15   33.25
   8  -2 -16   29.84   18.17
   8   2 -16   11.86    7.18
   9  -3   6   11.08    8.80
   9   3   6   25.82   10.39
   8 -13  -2  141.42   38.44
   8  13  -2  210.91   32.17
   0   2  23  256.59   37.35
   0  -2  23  218.45   61.30
   1 -17 -15    1.58   14.35
   1  17 -15   -0.90    9.89
   7  14   5  771.71   54.58
   7 -14   5  726.42   78.90
   9  -5   5  289.48   28.68
   9   5   5  299.08   38.40
   7  15  -7  712.43   98.78
   7 -15  -7  739.80   59.39
   1  18  13  138.03   21.06
   1 -18  13  152.13   23.95
   3   1  21  136.97   27.57
   3  -1  21  161.67   26.94
   3   0 -23  991.56   46.54
   4  20  -5   63.51   18.98
   4 -20  -5   82.37   36.25
   7   0  14   14.51   10.77
   5 -13  13 1571.50   83.46
   5  13  13 1590.30   76.62
   4  14  14  202.20   50.70
   4 -14  14  112.17   23.33
   2  16 -16  525.69   47.19
   2 -16 -16  421.61   45.42
   5  19   1   17.68   10.26
   5 -19   1   13.42   19.82
   6 -17   3  301.30   48.98
   6  17   3  304.55   23.78
   9  -3 -12   35.89   13.16
   9   3 -12   26.99   14.76
   9   9  -1  250.16   66.19
   9  -9  -1  265.21   37.26
   1  22   2   33.13   13.40
   1 -22   2   31.69   12.10
   0  19  12   45.20   20.57
   0 -19  12   57.84   14.43
   8  12  -8    2.18    4.35
   8 -12  -8   38.11   24.01
   2 -14 -18  517.67   44.78
   2  14 -18  415.02   46.17
   9  -5 -11 1632.67   86.55
   9   5 -11 1769.45   80.14
   8  13  -4 1354.54   96.20
   8 -13  -4 1377.15   68.62
   9  -9  -5  146.64   43.07
   9   9  -5  141.83   17.85
   6 -17  -7   49.11   18.71
   6  17  -7   17.27   18.35
   1  12  19   16.37   22.80
   1 -12  19   28.80    9.38
   3  -1 -23   49.57   16.31
   3   1 -23   65.31   21.80
   7  -1  14   25.76    8.26
   7   1  14   43.20   13.80
   5  14  12   16.70   17.08
   5 -14  12   45.33   14.74
   5  11 -18   19.79   13.65
   5 -11 -18   48.41   18.22
   8  11 -10  811.49   47.63
   8 -11 -10  790.45   98.19
   3 -21   2   97.35   22.77
   3  21   2   95.79   22.59
   2   0  22  361.80   59.46
   3  21  -4   40.85   13.82
   3 -21  -4  113.21   28.99
   8  13  -1  449.74   64.05
   8 -13  -1  545.35   55.82
   7  11 -14  623.84   58.48
   7 -11 -14  594.82   55.22
   5  -9  16   75.38   27.45
   5   9  16   88.31   27.24
   4 -15  13   61.75   23.38
   4  15  13   62.62   13.37
   8   0  11   23.87   12.94
   0 -14  18    1.61    9.98
   0  14  18   10.85   14.52
   1  22  -3   23.23   17.15
   1 -22  -3   20.48   12.18
   1  21   7   55.67   21.72
   1 -21   7   34.79   12.26
   2  -9  20  305.93   42.84
   2   9  20  307.10   56.88
   3   9  19  726.56   53.92
   3  -9  19  802.71  123.25
   2  -1  22    3.57   20.10
   2   1  22   15.15    7.86
   4 -13  15  205.37   41.24
   4  13  15  103.22   26.41
   4 -17 -13  397.56   47.51
   4  17 -13  456.52   47.85
   8  -5  10  181.32   30.68
   8   5  10  115.95   24.98
   1   4 -23   13.83    9.35
   1  -4 -23   24.28   23.83
   9  -8   2  216.67   25.56
   9   8   2  208.62   44.28
   5 -17 -11   32.01   14.19
   5  17 -11   11.34   22.61
   1 -13 -19   40.58   12.36
   1  13 -19   27.63    9.10
   8  -1  11   75.57   14.10
   8   1  11   64.86   26.99
   7   7 -17  341.94   56.41
   7  -7 -17  394.11   45.82
   3  -2  21  177.53   27.66
   3   2  21  114.12   24.99
   0  -7  22   11.57   14.60
   0   7  22   59.41   19.09
   4 -19  -9  173.01   29.69
   4  19  -9  149.57   26.15
   6  -4  16  241.07   42.28
   6   4  16  354.58   34.31
   5  12  14 1118.21   49.12
   5 -12  14 1063.13   46.61
   3  -9 -21  578.57   65.08
   3   9 -21  493.63   45.75
   7  13   7  625.75   47.33
   7 -13   7  600.30   81.63
   7 -10 -15  136.69   24.99
   7  10 -15  125.78   27.92
   5   7  17  415.12   59.42
   5  -7  17  550.60   58.32
   6  16   6   43.78   18.05
   6 -16   6   39.56   13.67
   8  12   3 1578.22   83.81
   8 -12   3 1569.14   69.22
   9  -8  -8   47.48   16.87
   9   8  -8   46.93    9.77
   0 -17  15   22.41   13.08
   0  17  15   18.14   21.14
   6   7  15   74.44   20.01
   6  -7  15   47.90   14.24
   3  -2 -23   23.48   12.31
   3   2 -23   24.75   11.74
   7  -2  14   16.50   16.59
   7   2  14   17.08   14.21
   7  12 -13 2504.73  100.37
   7 -12 -13 2405.36  121.02
   6 -16 -10  492.43   66.89
   6  16 -10  503.56   48.14
   2   4 -23  -13.79   23.02
   2  -4 -23   70.09   21.05
   8   7   9  546.69   29.96
   8  -7   9  658.83   37.23
   5   5 -21  695.42   87.23
   5  -5 -21  752.84   53.73
   8  -3 -16  403.37   39.13
   8   3 -16  403.47   57.83
   8  13  -5  132.64   48.82
   8 -13  -5  162.82   28.80
   5 -19  -5   26.78   14.87
   5  19  -5   35.01   14.61
   0  -3  23  238.99   34.22
   0   3  23  137.17   28.56
   4 -20   3  222.47   58.05
   4  20   3  216.71   32.82
   6  -4 -20   30.03   18.83
   6   4 -20   94.70   19.69
   2 -21  -7   35.61   17.81
   2  21  -7   44.90   13.96
   8  11   5  348.66   52.11
   8 -11   5  398.60   54.24
   4   6  19   40.25   14.42
   4  -6  19   23.63   12.48
   2 -11  19  199.66   37.96
   2  11  19  160.02   33.50
   7 -14 -10   46.68   15.44
   7  14 -10   50.99   13.92
   9   9   0   34.91   13.40
   9  -9   0   -1.58    5.64
   3 -19   9   38.16   10.55
   3  19   9   24.24   29.95
   7  15   3  515.58   65.61
   7 -15   3  709.63   63.09
   0 -22   4   91.98   29.28
   0  22   4   53.45   17.80
   2  -2  22  528.64   57.56
   2   2  22  375.89   42.90
   6  -9  14  418.80   68.90
   6   9  14  415.71   44.54
   6   7 -19   85.30   32.20
   6  -7 -19  193.26   30.02
   8  13   0 2310.32   98.32
   8 -13   0 2285.17   90.58
   6  15   8  127.68   24.10
   6 -15   8  151.12   35.06
   9   9  -6  685.25   51.65
   9  -9  -6  651.48   73.09
   5   4  18   27.60   22.21
   5  -4  18    7.57   10.29
   3  19 -11 1054.11   61.64
   3 -19 -11 1061.75   69.87
   5  15  11  157.40   39.95
   5 -15  11  162.87   34.95
   1 -22   3   95.72   21.42
   1  22   3   89.89   20.02
   8   2  11    4.15   12.37
   8  -2  11   27.95    8.82
   2 -17 -15  150.78   40.94
   2  17 -15  180.13   23.71
   5  19   2  123.86   21.75
   5 -19   2  110.58   52.97
   9  -4   6   25.67   19.58
   9   4   6   32.84    9.35
   3  11  18  297.54   53.86
   3 -11  18  304.67   66.14
   6  15 -12  224.26   34.89
   6 -15 -12  246.50   27.67
   1  10 -21   34.66   21.25
   1 -10 -21   18.35   12.73
   2 -19 -12  241.72   34.58
   2  19 -12  242.15   31.73
   0 -21   8   95.17   16.61
   0  21   8   76.09   23.50
   2 -13 -19 1260.18   59.81
   2  13 -19 1326.26   67.85
   7  -6  13  162.38   26.51
   7   6  13  190.95   28.52
   5  18  -9   31.45   13.18
   5 -18  -9   19.82   24.95
   6  -9 -18  242.04   36.19
   6   9 -18  182.48   33.45
   1  21  -8  193.93   28.18
   1 -21  -8  162.99   33.28
   7  -5 -18  282.58   28.85
   7   5 -18  241.53   44.84
   3  11 -20  385.81   60.31
   3 -11 -20  433.71   56.26
   4 -16  12   23.98   14.60
   4  16  12   18.86   11.47
   7   8  12   18.34    9.30
   7  -8  12   16.86   12.83
   2 -20 -10  391.26   52.46
   2  20 -10  350.70   40.79
   4   0  20 4093.06  170.55
   8  -6 -15   44.13    8.35
   8   6 -15   21.42   24.50
   9  -4 -12  702.40   27.01
   9   4 -12  845.95   51.02
   4  20  -6  316.27   38.77
   4 -20  -6  350.77   49.40
   3 -21   3   -5.09   10.82
   3  21   3    8.73   10.82
   9   0   7  502.16   45.31
   4  -5 -22   21.70   22.90
   4   5 -22   31.21   19.96
   3 -21  -5  795.32   63.33
   3  21  -5  979.26   59.28
   3  -3  21   58.39   28.17
   3   3  21   47.85   18.96
   5 -17   8   83.44   24.21
   5  17   8  142.76   26.74
   1 -22  -4  135.84   36.95
   1  22  -4  148.39   35.99
   5 -16 -13   40.26   15.63
   5  16 -13   35.37   18.79
   3   7  20   50.36   22.06
   3  -7  20   12.30   11.05
   2 -15  16  379.61   61.27
   2  15  16  334.13   43.88
   5   8 -20  463.73   69.28
   5  -8 -20  469.90   66.48
   1 -18 -14   42.97   14.23
   1  18 -14   23.43   15.53
   4   1  20   19.34   23.76
   4  -1  20   14.91   18.40
   1  -6  22  451.68   56.30
   1   6  22  397.84   68.46
   4 -12  16   32.47   25.44
   4  12  16   30.73   26.23
   7  -9 -16  199.99   23.21
   7   9 -16  270.71   36.41
   2  21   6   36.26   18.04
   2 -21   6   83.78   19.32
   9  -1   7   48.10   11.70
   9   1   7   41.78   15.10
   3  18  11 1201.38   74.89
   3 -18  11 1305.11   59.36
   3   3 -23   51.37   23.43
   3  -3 -23   27.07   14.32
   7   3  14   71.74   15.40
   7  -3  14   94.03   20.64
   3   7 -22  103.54   16.75
   3  -7 -22   67.77   39.06
   9   0 -13   34.51   24.10
   0  13  19   68.86   23.51
   0 -13  19   39.99   12.16
   7  15  -8   27.40   18.93
   7 -15  -8   -6.16   16.80
   2 -10 -21  447.72   51.06
   2  10 -21  366.31   53.73
   2   7  21   28.46   12.05
   2  -7  21    3.35   13.86
   2 -16  15  595.04   47.07
   2  16  15  641.59   58.55
   3 -18 -13   21.48   20.72
   3  18 -13   10.46   19.61
   8  13  -6    6.77   20.08
   8 -13  -6   11.03   10.74
   4   8 -21 1056.46   71.97
   4  -8 -21  999.72   59.45
   1  -8 -22   74.33   21.85
   1   8 -22   58.39   19.25
   4  18   9   55.02   19.26
   4 -18   9   21.54   15.63
   9   7   4   62.08   17.96
   9  -7   4   58.57   13.21
   5  11  15  574.17   71.80
   5 -11  15  653.58   49.28
   4 -10 -20  528.91   71.26
   4  10 -20  504.59   60.83
   7  13 -12 1788.48  107.27
   7 -13 -12 1834.77   78.37
   9   1 -13  152.24   35.72
   9  -1 -13  220.34   53.11
   1  20  10   47.64   26.14
   1 -20  10   13.28   12.06
   2   3  22   50.30   14.59
   2  -3  22   33.70   15.92
   7  16  -2   21.59   17.56
   7 -16  -2   28.80   15.70
   8  -9 -13   32.10   13.91
   8   9 -13    8.47    9.04
   6 -17   4  159.93   38.07
   6  17   4  172.60   28.51
   9   6   5  668.74   49.42
   9  -6   5  653.08   33.37
   7 -16  -3  257.18   37.02
   7  16  -3  328.66   54.26
   4  14 -17   35.01   15.53
   4 -14 -17   43.66   13.27
   9   7 -10  693.23   60.49
   9  -7 -10  601.98   45.37
   2 -22  -1  233.76   37.43
   2  22  -1  271.77   59.98
   8   3  11   55.13   26.29
   8  -3  11   78.73   14.75
   5  18   6   -7.92   20.22
   5 -18   6   42.88   22.52
   2  14  17  249.07   42.56
   2 -14  17  192.97   48.63
   3  20   7  500.21   65.63
   3 -20   7  542.45   46.47
   6 -17  -8   76.97   20.87
   6  17  -8   31.74    7.62
   2 -22   0   17.03    9.63
   2  22   0   47.18   24.13
   8 -10 -12  505.25   82.59
   8  10 -12  579.78   76.45
   8   4 -16   28.56   20.98
   8  -4 -16   12.91    6.34
   8 -13   1  696.07   43.21
   8  13   1  488.91   71.53
   5 -10 -19  554.82   60.79
   5  10 -19  399.15   49.96
   3  20  -9   26.99   17.10
   3 -20  -9   31.51   15.20
   5  19  -6  142.41   56.04
   5 -19  -6  117.67   18.44
   4   2  20  601.30   78.98
   4  -2  20  547.90   68.04
   0   4  23   88.43   20.64
   0  -4  23  124.22   26.87
   9   9   1   24.98   22.79
   9  -9   1   -0.60    8.24
   8  12  -9    5.11    5.90
   8 -12  -9   67.06   25.24
   1  -5 -23  692.00   69.20
   1   5 -23  714.60   55.76
   0  18  14   22.74   12.98
   0 -18  14   17.11   16.06
   4 -15 -16  319.49   52.05
   4  15 -16  335.97   41.18
   9   6 -11  334.70   75.10
   9  -6 -11  257.72   58.30
   9  -2   7   33.45   12.42
   9   2   7   31.59   12.86
   2   8 -22  232.29   38.16
   2  -8 -22  302.26   38.49
   7  16  -1   69.56   23.59
   7 -16  -1  105.50   29.17
   7   0 -19  316.31   40.33
   9  -9  -7   35.17   16.75
   9   9  -7   11.79    8.18
  10   0  -3   17.74   15.99
   6   5  16   15.03   18.59
   6  -5  16   25.16   12.33
   4  19   7  651.84   61.37
   4 -19   7  528.57   62.89
   2  22  -2   26.64   31.74
   2 -22  -2   28.39   17.93
   6  18  -2   24.94   14.11
   6 -18  -2   25.94   13.23
  10   0  -4  698.60   67.77
   9  -8   3  202.86   25.27
   9   8   3  143.80   44.47
   1  22   4   38.20   15.37
   1 -22   4   38.85   16.04
   7  16  -4   45.33   21.15
   7 -16  -4    2.14   12.88
   7  -1 -19   49.24   12.15
   7   1 -19   34.39   12.02
   2 -20   9   26.36   11.62
   2  20   9  -21.91   23.57
   6  12  12   40.14   15.38
   6 -12  12   32.86   10.17
   1 -19  12   53.53   11.75
   1  19  12   59.96   27.49
   1  -9  21   56.63   16.45
   1   9  21   82.11   42.46
   6 -13  11  187.68   46.82
   6  13  11  190.24   37.57
   2  -5 -23   52.54   23.74
   2   5 -23    5.71    5.73
  10   1  -3    1.39   28.71
  10  -1  -3   43.24   34.10
   9   2 -13   19.48   20.63
   9  -2 -13    3.83    6.51
   1 -12 -20   79.08   17.46
   1  12 -20   81.75   17.11
   2 -22   1   60.53   15.55
   2  22   1   25.66   21.99
   3  15  15  341.56   49.19
   3 -15  15  336.89   51.23
   4   9  18 1735.88   87.93
   4  -9  18 1721.87  123.33
   2 -19  11  187.50   21.81
   2  19  11  158.14   35.19
   6 -18  -1   44.05   19.51
   6  18  -1   28.42   21.28
   6 -18  -3  184.00   36.12
   6  18  -3  201.71   29.41
   8  -8 -14   11.08   34.29
   8   8 -14   13.98   10.68
   4 -20   4    6.23   36.11
   4  20   4   18.05   15.31
  10  -1  -4   19.49   25.30
  10   1  -4   50.72   16.42
   8  -6  10   36.31   12.15
   8   6  10   26.90    8.37
  10   0  -2 2441.89  111.75
   0 -22   5   44.95   22.97
   0  22   5   18.77   15.37
   4  13 -18   43.86   15.23
   4 -13 -18   39.86   16.76
   9   8  -9    5.60   13.20
   9  -8  -9   15.49   18.33
   5  19   3   21.51   12.28
   5 -19   3   30.30   20.77
   6   5 -20   27.08   14.44
   6  -5 -20   42.41   10.67
   7 -14   6   52.69   20.24
   7  14   6   49.97   22.28
   3  15 -17    7.34   14.32
   3 -15 -17   40.94   16.58
   1  16  16  133.44   22.60
   1 -16  16  107.71   18.67
   1  15  17   -0.99    6.83
   1 -15  17   14.86   11.10
   0 -10  21   61.19   18.91
   0  10  21   45.47   17.63
   5  16  10  286.37   48.20
   5 -16  10  307.64   32.02
   2  17  14  455.77   79.13
   2 -17  14  357.41   55.24
   6 -13 -15   39.10   21.43
   6  13 -15   17.73   12.99
   6  12 -16   33.28   17.96
   6 -12 -16   36.03   19.85
   1  11  20  160.28   34.31
   1 -11  20  137.57   27.41
  10   1  -2  539.36   64.89
  10  -1  -2  450.68   64.23
   5   5  18   62.84   15.49
   5  -5  18   22.58   18.27
   1   0  23 1945.84  107.11
   8 -12   4   35.10   21.04
   8  12   4   43.83   10.85
   3 -14  16  130.23   28.54
   3  14  16  158.78   29.62
  10   0  -5   23.72   13.51
   3   4  21    7.50   15.78
   3  -4  21   41.88   16.04
   7 -16   0  171.78   22.83
   7  16   0  210.15   37.84
   7  11  10   53.75   22.31
   7 -11  10  130.58   19.24
   5   6 -21   97.30   45.36
   5  -6 -21  157.76   38.00
   9   5   6   32.69   13.22
   9  -5   6   22.13    7.19
   2  18 -14   21.04   16.51
   2 -18 -14   28.69   14.65
   3 -14 -18   44.03   17.95
   3  14 -18   34.94   12.16
   8   9   8  461.21   80.95
   8  -9   8  465.28   50.70
   3  16  14    0.42    7.06
   3 -16  14   19.63   15.01
   1  -1  23  133.76   28.04
   1   1  23   76.41   28.40
   1 -22  -5  943.30   90.01
   1  22  -5  983.67   59.04
  10   1  -5   71.58   24.13
  10  -1  -5   45.43   26.07
   8  11 -11   51.31   16.34
   8 -11 -11   52.33   18.58
   2  22  -3  228.37   32.78
   2 -22  -3  274.18   36.52
   8 -10   7  824.44   37.67
   8  10   7  750.89   93.01
   5   0 -22    3.25   16.91
   7  -2 -19  342.62   44.91
   7   2 -19  417.15   51.66
   3   4 -23  109.60   26.01
   3  -4 -23  130.28   27.71
   7   4  14   56.44   14.10
   7  -4  14   59.51   13.94
   7  15   4  861.99   77.88
   7 -15   4  941.31   74.79
   3  21   4   83.33   21.26
   3 -21   4   56.25   11.94
   9 -10  -3  452.77   60.85
   9  10  -3  385.46   72.31
   6  18   0  167.27   25.12
   6 -18   0  218.41   32.35
  10   2  -3  183.69   36.68
  10  -2  -3  105.97   43.21
   3 -21  -6   67.57   26.35
   3  21  -6   50.35   13.19
   6  18  -4   28.83   13.51
   6 -18  -4   21.41   14.33
   7  12   9   56.11   21.58
   7 -12   9   18.81   13.75
   3 -16 -16  107.21   21.91
   3  16 -16  200.29   27.81
   4  -3  20   52.42   20.52
   4   3  20   30.01   11.13
   4  16 -15  443.62   55.98
   4 -16 -15  354.52   44.49
   9   5 -12 1082.61   76.73
   9  -5 -12 1163.94   74.38
  10  -2  -4  370.88   61.27
  10   2  -4  327.25   49.01
   2  12 -20  204.47   31.43
   2 -12 -20  178.68   27.08
   4  17  11  205.97   30.48
   4 -17  11  192.55   38.15
   1  21   8   43.78   18.62
   1 -21   8   45.30   10.17
   8  13  -7  390.63   59.08
   8 -13  -7  527.67   55.31
   9   3   7  100.22   24.62
   9  -3   7   57.68   19.74
   6 -11  13  194.60   27.67
   6  11  13  170.46   26.69
   1  20 -11   88.85   23.68
   1 -20 -11   46.08   13.46
   9 -10  -2   93.50   27.38
   9  10  -2  102.29   30.14
   5  -1 -22   34.06   12.27
   5   1 -22    3.00   15.60
   4  18 -12   14.56   15.51
   4 -18 -12   30.43   17.21
  10   0  -1   57.59   23.46
   7  16  -5   53.06   22.46
   7 -16  -5   78.96   34.72
   9 -10  -4   51.01   12.71
   9  10  -4   63.11   19.54
   6  14  10   70.04   27.48
   6 -14  10   27.35   16.62
   4  20  -7    5.42    3.88
   4 -20  -7   25.94   17.26
   2 -22   2  113.32   19.66
   2  22   2  124.04   28.14
   2  -4  22  343.31   44.64
   2   4  22  399.11   53.62
   2 -13  18   49.69   22.33
   2  13  18   70.76   46.77
   2  21  -8   -5.27   11.50
   2 -21  -8   19.67   24.57
  10   2  -2  847.83   86.40
  10  -2  -2  729.85   98.10
   1 -17  15  438.77   40.81
   1  17  15  417.82   37.14
   7  10  11    1.12   15.70
   7 -10  11   38.64   11.21
   8  -4  11   78.83   13.23
   8   4  11   61.65   14.35
   7   8 -17  133.44   28.39
   7  -8 -17  152.24   25.38
   0  -8  22  398.23   42.11
   0   8  22  340.26   57.62
  10  -1  -1  631.57   80.45
  10   1  -1  882.01   61.38
   4   7  19   12.35   16.23
   4  -7  19   31.72   19.54
   7   6 -18  144.54   28.98
   7  -6 -18   81.21   15.93
   4  19 -10    4.86   10.66
   4 -19 -10   17.35   29.35
   1  14  18  132.10   36.49
   1 -14  18   39.47   13.71
   9   3 -13  166.82   76.76
   9  -3 -13  269.31   50.03
   6 -14 -14  257.25   38.62
   6  14 -14  269.53   47.76
   6 -11 -17   31.29   16.46
   6  11 -17   17.08   14.30
   5  -8  17  138.39   26.73
   5   8  17  153.34   53.97
   0  20  11   22.44   17.15
   0 -20  11   45.26   17.12
   4 -11  17  495.99   71.67
   4  11  17  511.34   49.67
   1  -2  23 1292.25  118.38
   1   2  23 1039.29   67.43
  10   2  -5   16.94   25.64
  10  -2  -5   15.30   19.33
  10   0  -6  165.70   34.53
   6   8  15   29.05   14.54
   6  -8  15   46.90   14.06
   4   6 -22   26.87    9.14
   4  -6 -22   68.09   19.78
   8 -13   2 1142.57   65.50
   8  13   2 1154.35   73.29
   6  16   7  254.61   46.85
   6 -16   7  236.36   38.91
   8   8   9   45.61   14.65
   8  -8   9   32.52   10.06
   5 -14 -16  255.02   44.15
   5  14 -16  165.91   29.79
   9  10  -1  297.44   42.68
   9 -10  -1  331.60   37.87
   7  -7  13  272.60   29.14
   7   7  13  206.93   47.33
   9   9   2   62.97   25.38
   9  -9   2   42.86   12.33
   6 -16 -11   28.11   12.76
   6  16 -11   29.07   17.21
   5 -13 -17   47.24   21.75
   5  13 -17   59.68   16.32
   9 -10  -5   49.75   22.74
   9  10  -5   57.28   18.76
  10  -1  -6  311.76   61.05
  10   1  -6  192.27  106.11
   5   2 -22  116.81   38.64
   5  -2 -22  135.34   28.92
   8  11   6  685.47   83.19
   8 -11   6  660.75   69.34
   3  13  17  148.38   32.60
   3 -13  17  128.88   38.43
   7 -14 -11   74.88   13.27
   7  14 -11   80.01   14.35
   8   5 -16   57.30   22.20
   8  -5 -16   56.68   14.64
   0  12  20   27.15   16.72
   0 -12  20    6.41   14.66
   7  16   1  151.29   34.28
   7 -16   1  125.33   27.01
   5  19  -7  438.07   42.84
   5 -19  -7  417.17   46.34
   8  -7 -15 1300.34   75.52
   8   7 -15 1185.91   77.05
   6   8 -19   60.99   21.04
   6  -8 -19   49.28   16.31
   4 -12 -19  338.46   40.74
   4  12 -19  191.91   42.67
   9  -9  -8   46.44   17.80
   9   9  -8   81.00   13.38
   0  -5  23   93.47   27.63
   0   5  23   73.52   17.76
   7  15  -9   24.22   10.11
   7 -15  -9   24.13   12.15
   6  18   1   40.40   21.11
   6 -18   1   47.99   20.30
   5  10  16  381.70   53.92
   5 -10  16  389.06   54.87
   8   0 -17    8.63   11.83
  10   2  -1   31.68   13.99
  10  -2  -1   -9.78   27.81
   7   3 -19  104.45   23.33
   7  -3 -19  131.23   34.40
   3 -13 -19   72.34   20.89
   3  13 -19   62.50   17.13
   6  18  -5   24.94   14.73
   6 -18  -5   32.41   19.30
   1  19 -13   46.04   14.81
   1 -19 -13   27.65   11.65
   5  17 -12   80.22   18.21
   5 -17 -12   70.20   18.74
   2 -22  -4   10.26    9.88
   2  22  -4   22.72   16.93
  10   3  -3  439.32   67.55
  10  -3  -3  455.60   56.00
[truncated: 833,231 more chars]
